# Supplementary material for: Expanding the Repertoire of the Plant-Infecting Ophioviruses through Metatranscriptomics Data
Source: MDPI journal article supplement (doi:10.3390/v15040840), 2023-03-25
Supplement: s1 [file s1]

**Supplementary Table S1.** Virus names, abbreviations and NCBI accession numbers of ophiovirus sequences used in this study

| <b>Virus name</b>                 | <b>Abbreviation</b> | <b>Accession number</b> |
|-----------------------------------|---------------------|-------------------------|
| blueberry mosaic associated virus | BIMaV               | KJ704366- KJ704368      |
| carrot ophiovirus 1               | CaOV1               | OM419178-OM419181       |
| citrus psorosis virus             | CPsV                | MZ330078-MZ330080       |
| Dactylorhiza hatagirea ophiovirus | DhOV                | BK013328                |
| freesia sneak virus               | FreSV               | MN365016                |
| lettuce ring necrosis virus       | LRNV                | MW594439- MW594442      |
| Mirafiori lettuce big-vein virus  | MLBVV               | AF525933- AF525936      |
| ranunculus white mottle virus     | RWMV                | KY769680                |
| tulip mild mottle mosaic virus    | TMMMV               | KY769675                |
| pepper chlorosis-associated virus | PCaV                | BDO47352-BDO47349       |
