# Supplementary material for: Expanding the Repertoire of the Plant-Infecting Ophioviruses through Metatranscriptomics Data
Source: MDPI journal article supplement (doi:10.3390/v15040840), 2023-03-25
Supplement: s1 [file s1]

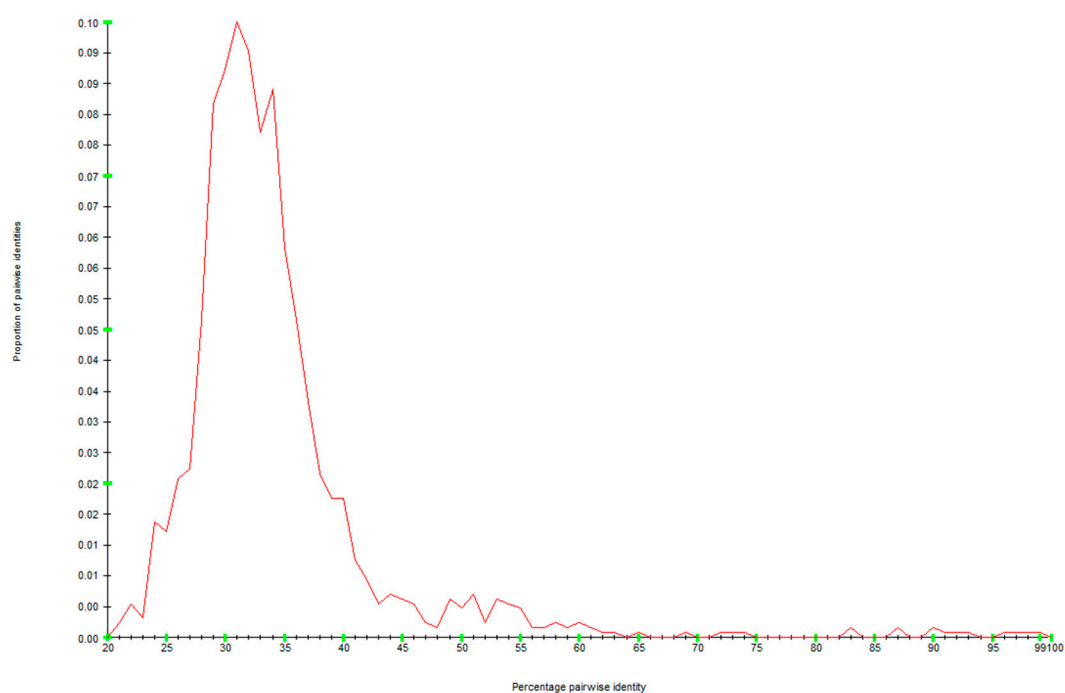

**Supplementary Figure S1.** Plot of frequency of percentage pairwise identity of ophiovirus complete capsid proteins generated using SDT v1.2 software based on MAFFT amino acid sequence alignments.

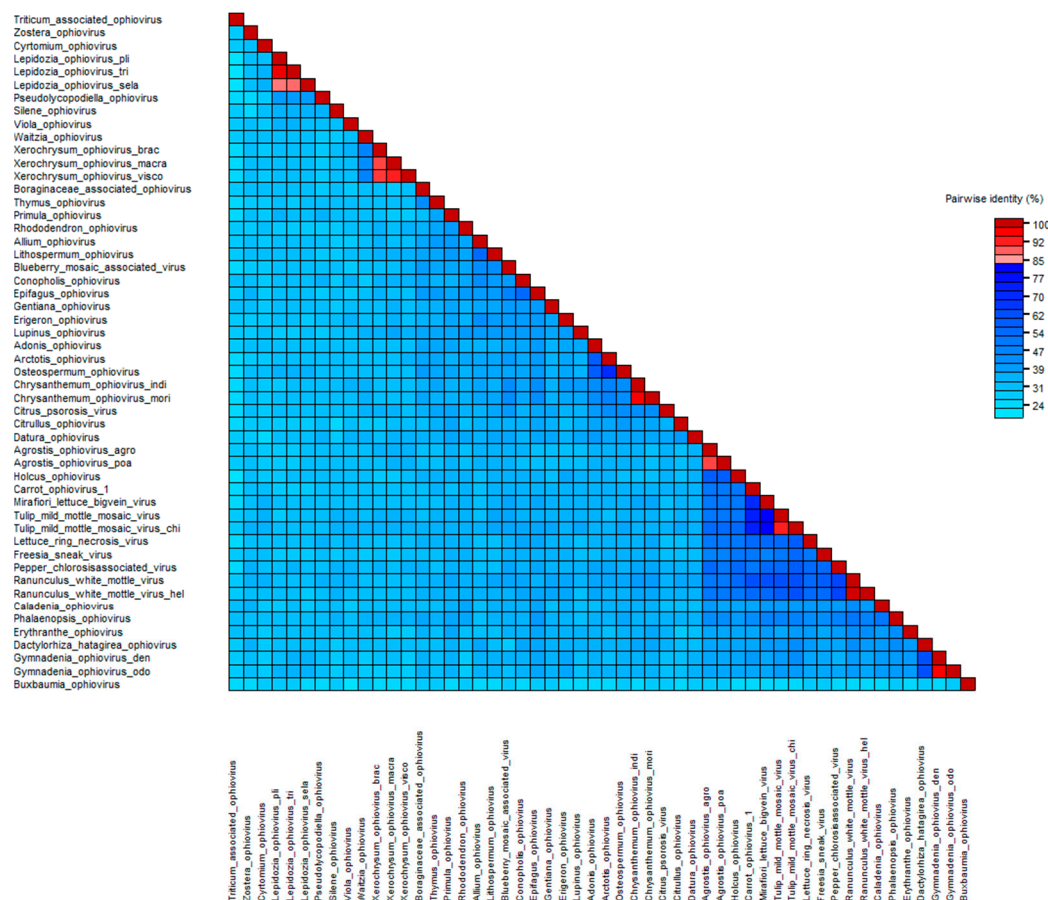

**Supplementary Figure S2.** Pairwise identity matrix of the amino acid sequences of the ophiavirus complete capsid proteins generated using SDT v1.2 software based on MAFFT alignments. The colored cut-off is based on ICTV demarcation criteria of ophiaviruses, which includes CP amino acid sequence identity <85% to be considered novel species (blue-light blue).

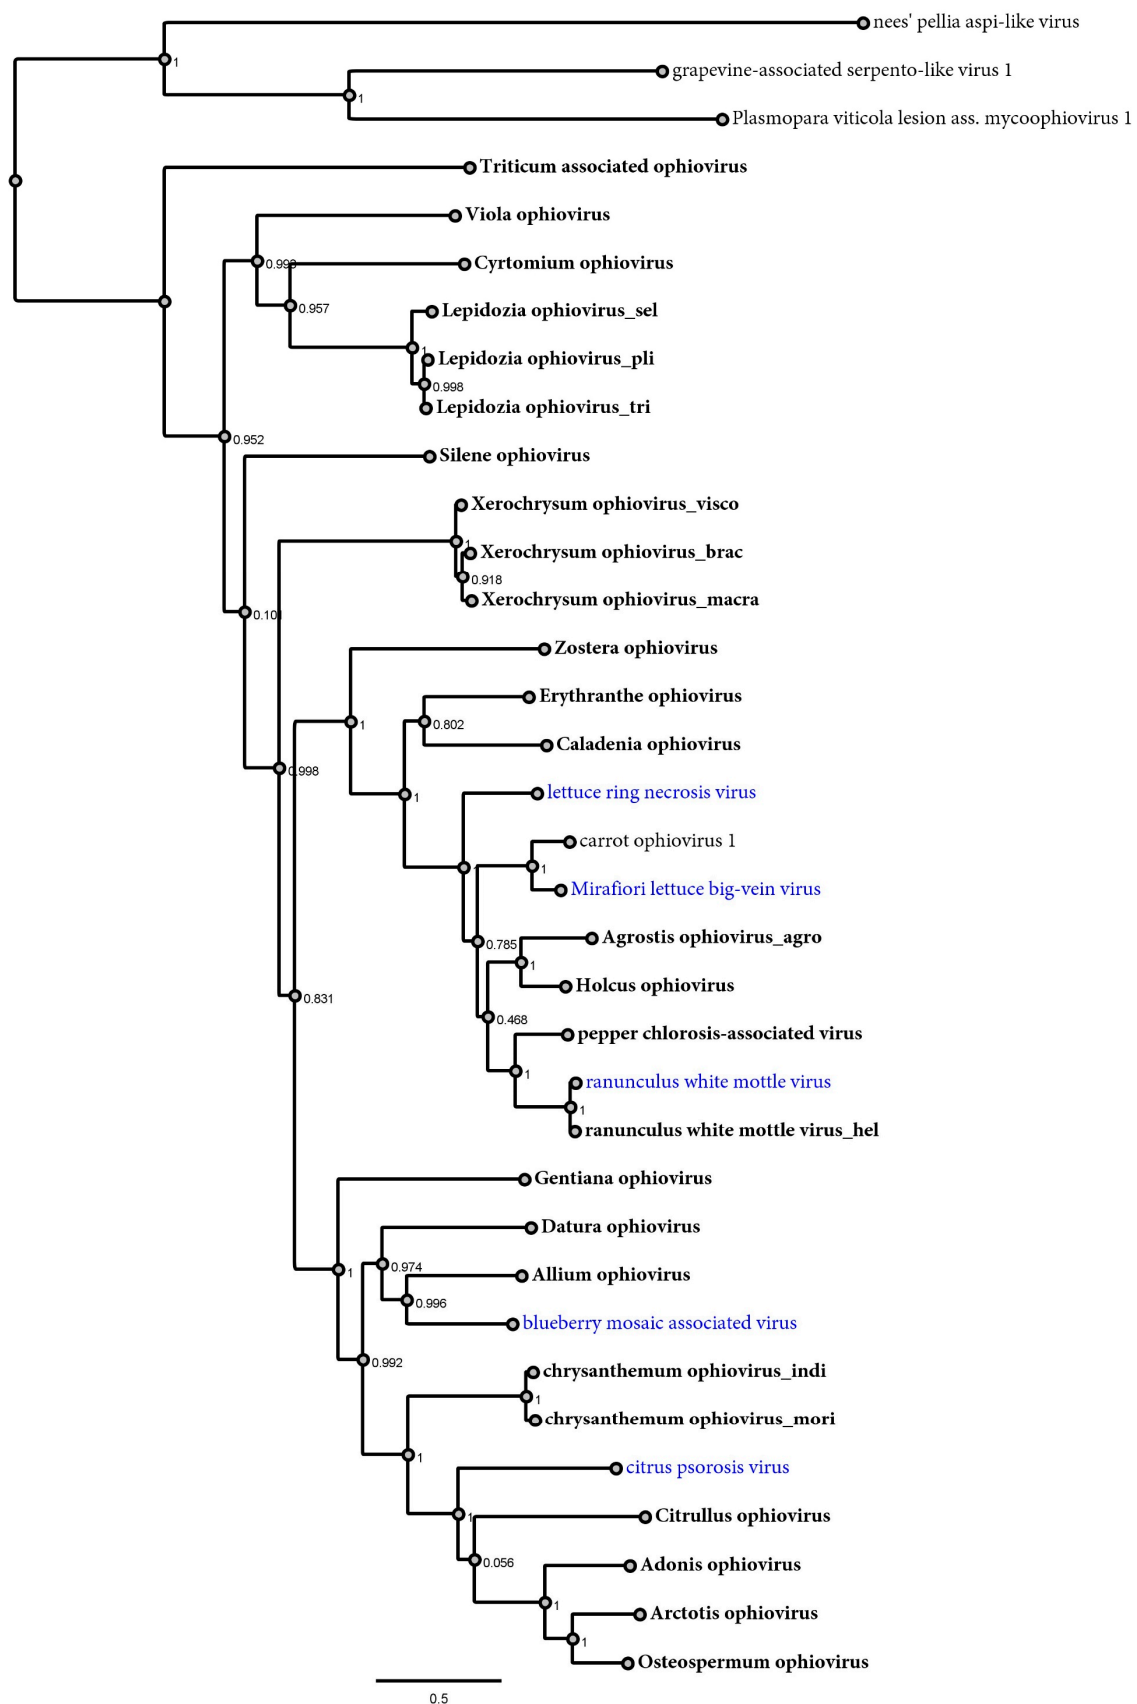

**Supplementary Figure S3.** Maximum-likelihood phylogenetic tree based on the amino acid MAFFT sequence alignments of the RdRp protein of all the ophiioviruses reported thus far and in this study. The

scale bar indicates the number of substitutions per site. The node labels indicate FastTree support values. The RdRp proteins of three related and unclassified aspirovirus-like viruses (nees' pella aspi-like virus CAH2618860, Plasmopara viticola lesion ass. mycoophiovirus 1 QJX19787, grapevine-associated serpeno-like virus 1 QXN75438) were used as outgroup.

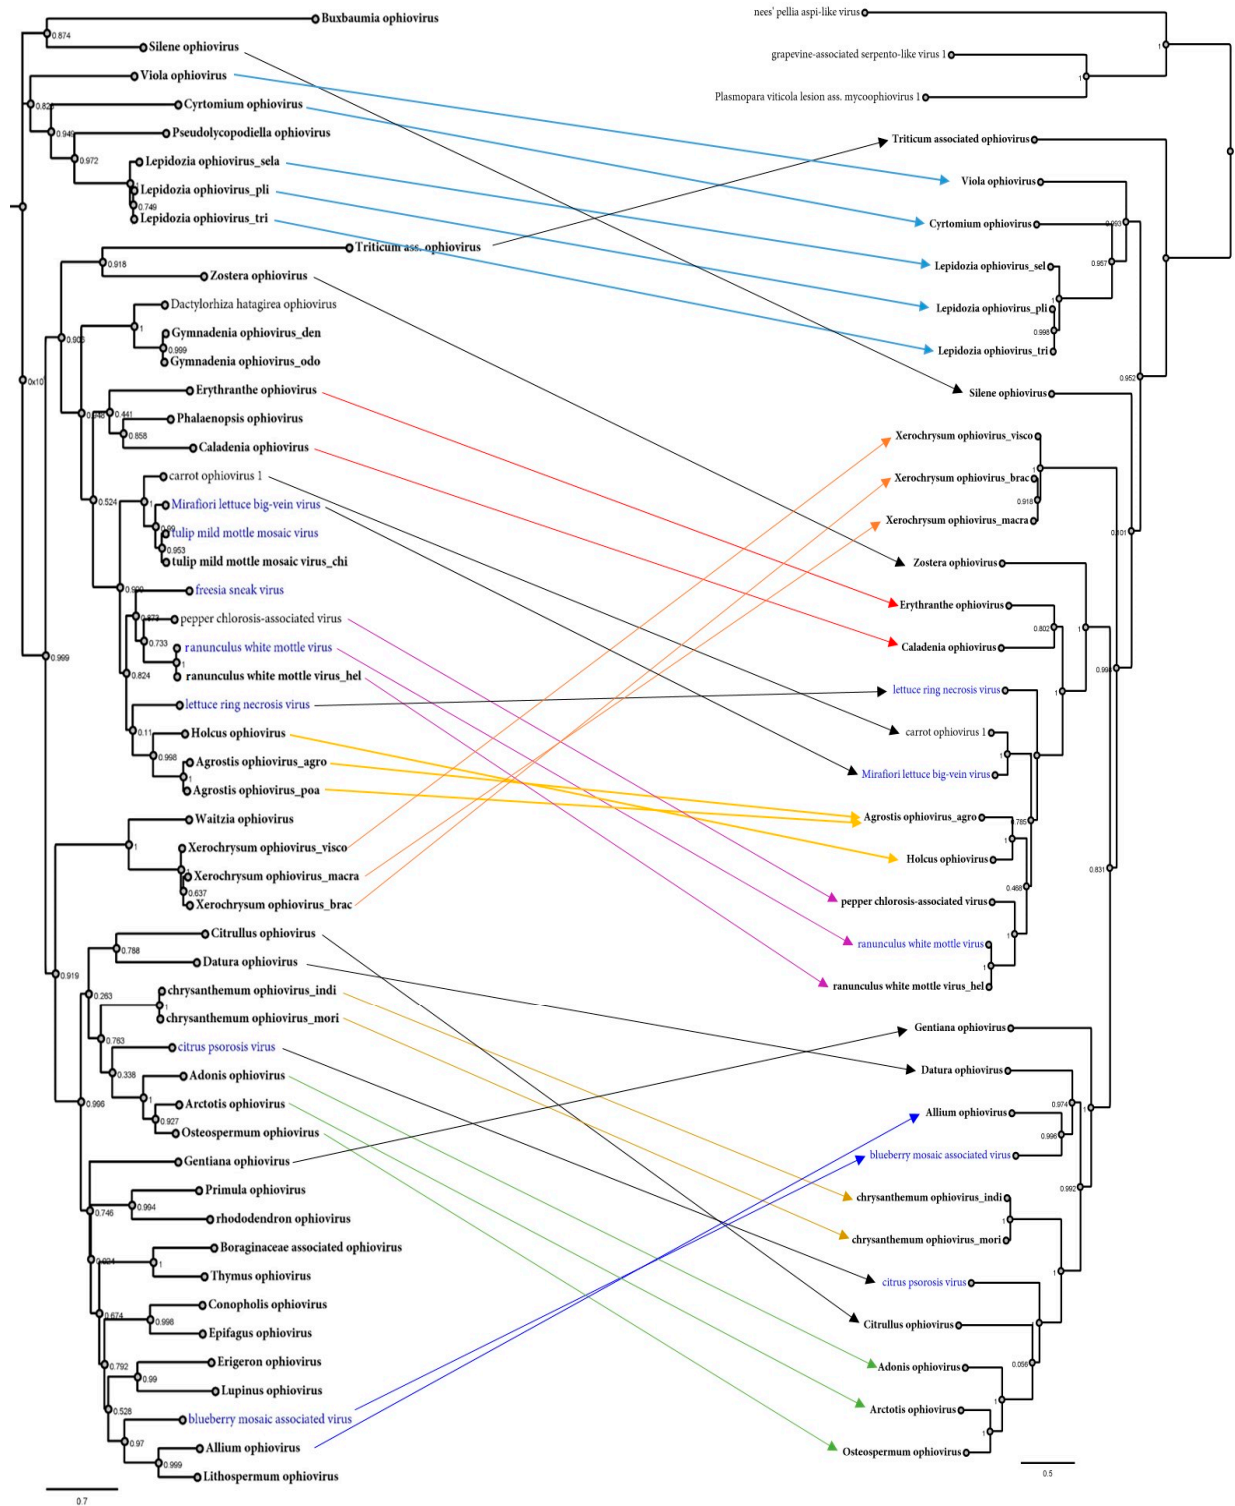

**Supplementary Figure S4.** Tanglegram contrasting phylogenetic relationships of the ophioviruses predicted with the CP protein (left), against an L protein maximum-likelihood phylogenetic tree shown on the right. Links of well-supported clusters of viruses co-diverging in both trees are indicated in colors. Viruses corresponding to members of ICTV recognized species are depicted in blue. The scale bar indicates the number of substitutions per site.

>Seq1 [organism=Adonis ophiovirus] RNA1 partial sequence

```
CTTCCTTCCTCGTCCTCATACTCATCAACCCCTCGGTTGACGGGGATCTGTACTCCTCTTTGC
GTATCATTTCCTGTTGTAGATTACATCAATCTGAGAAGTAGCAATCATCATCAAATCCAAATT
CCTCTCTCATTTCTTCAGCGGTAATGGTTTGATTTCTCTCTATTTCTTCTCGGGAAGTTCCTAT
CAAACCGGCAACCTCTGATGATATCATTTTCAGCCATAACTTGATTATTTCTTCTATGGAGCT
TTGTTCTGCGTATTTGCTTTTGCCGATTCAGCACTAAAATTTCTTTCTCGAATTTTCATGCAC
CCTTGCAAGCCTTTTCCCAAGTTGCTCAAGAGTTCGTTCCCCCACTGATGATTCACATAATCC
TCAAACCTTTGTGAAAGATCTAAGTGCCTCTATTTTCAGTCCTCATCTCATTCTCCAATTCTTCCT
TGGATTTGTTGATCTTCTTCCTTTTGAATAATCTAATCTTATTGTTTCATAATCTCTGTTCTTT
TGTTTTCTCATTTTCTTCAATTCCATGAACTCAGATATCATCCNNNNNNNNNNNNNNNNNNNN
NNNNNNNNNNNNNNNNNNNNNNNNNNNNNNNNNNNNNNNNNNNNNNNNNNNNNNNNNNNNNN
NNNNNNNNNNNNNNNNNNNNNNNNNNNNNNNNNNNNNNNNNNNNNNNNNNNNNNNNNNNNNN
NNNNTGCAAGCTTGAGAAAAGCAACTTCCCCGTTTCTTCCCAAATAGGCTTTCCTAACCAAT
TTTGAAATCCTGACTAGTCTGTGCAACGAGTGATATTTTCTCTAAATGAAGCACCAGTCTCA
ATGCTCATTATCAGTTCTTTAAAGTTCACCTGTCCATCTTCAACTTGCTGAAGTCCCTTGTGT
ATTGCTTTCCATGATTGATACGCTTCAACAGAGTTCACACGTTGGTTTGTCAAGTGTTCAGTG
AGATGTTTCGAGTTGTTGTTTCCTACAATCTTTTATATCGACCACGAATTTGCCTGAATTCTTG
ACGAATTTTTTGTCAACAAGCACTTGTGGAGATAAGTCTTTTTTCTCCTCATATTCTTTGCTTA
ATATTTTTAGTAACTCTTTCTTGGACACCCCGTTCACTCCGGTTGTCAACTTAGGAACGGACA
CAATGAGCAAGTCTTCCATCTCCTTTTCCATTGTGACCTTGATCTTTTCTTCTCTTTGGCTAA
GAAGTATGTTTCCTCTAATTTCGGTCACCATAAGATCTCTCATTCTTTGGCCTTTCCTAATTTTT
GATTCTATTTACCTCCCAGGAAGTTGTCATCTTCTTCTCTTTCCAGCAATATTGTCACCAAT
GATTTCGTCAGATATGAGCTCCACTGTGTGGTCGGACACATCACAAGGTTGAGAATTGAAAAT
CGAGTTTCGCCTCATCTTGAAGATCTCATTTGTCAATTTTTCTGCTATTATCGATTCAGTGAA
CGATCTTTTGGCGCTGGTGTCTGTGCTTTTTCTTTTTCTTCTCTTTTCTTCTGCTATTACCGG
TCGATTTCTCCAATGTCAAGTAAACATATCCTGGGGATTCAACTGAGGGAAGTAGCAGTTTA
GCCGAACCGCCTCTCGTTAACTCTTTCAAGAAACCAATGTCACCTGACAGCAACGAGTTTAT
CCGGAGCACCACCACTTTATTCGAGTCGTATAGATCCTCTATCATGGCCCCAAATGATGACT
TTTCTCCAGAAAAATGGGACACGTCAATCAAGAAGACGTCTCCATCTAGATACTCTGAGTAG
TTTTCTCTCTTAGTCATGTGATCGATGATTGATCTCCTTCATACCCGGTACACGGTTTATGA
GATTATATCCATCATTTCTGGAAACAGACTCATGTTGAATTCCAGATTTTGTCAATTGCAAAGT
GAAAGTCTCCCCTACCTCCAAACAAGTCCACCACTTTCTTCCCTTTGATCTTTTCTCCGAGAA
AACTCAACAATCCAAGCGCTGATGGATAGACATCTGACATCGTTGGAGAAGACAAATGTTG
TGGCTTACAATGCAGGGCACATATCATTTTCATAGCTCTGTGCAGATACCATTTTTTGTCTGA
```

GAAAAAATCGTCATCTACATCAATCTCTTCATATGATACATGCCCCACCTCCTTCTCAAATCT  
TTCACTATTGACATAGTCCTTGATGTCCGCATCATAGTATTGTACCAACATCTCAGTTTCAAA  
TACGTGTCCGTTCAATTTCTCATATAAATCTTCAAGGCATTCAAACATCTCATCCATTCTATA  
ACCACTGGTAGGGAAGGCGAAGAGTATCAATTCTGATATCCTTTTGTCTTTTATGTGGAAAT  
GGGCCTTCCCCTTCTTCAACCGTGAAAGATTGTTGACACCATTGCTTTTGTAAAGTCTTTCTT  
GATTATAAGTTTCATGGATTTTGCTGACTCCTCTTCCAGTTTGAACACTAAGCAAGTCGATAT  
GATGAAGACTTTTCATCAGAGTTCTGCGATAGTCGACAGAATATCCGAATTCATGATCTCCG  
TTATCCATTTTCGTCTTCTTAAAAGAATCTCCAAGGAGCTCAGTGTTTATTATGCTTCTCATCA  
CGGTTTTTGTGTAGCTCTCGTTTCCAATGATGTTTCAAGCCCCCTATAAAAAGAATAGAACTTGT  
CGAGATAATTGTCCCTGTTTAGGCTCATGTTAATTTCTGGAGCGATCTTGGATAGTGTGTCAT  
CAGGCAAGAGGTCAGGGGAAATTATCTCTTGGTCTTCCATGTATTTGTGGAGGCTCTTGAAT  
GAGGAAATTTCTGAAATTCTCTCGTCTGGAAGAACTGACTTGTGATCAATAAACTTCCCCTTT  
ATGTCATTATCGCATGAGATGAAGTATGAATAGTTTCTGTACAATCTCCCTTTCTCCGTGATC  
CTTTTTGTTTCTAAACTTTTTGGGATTTTGTGTTGGGAGGAGGCAAATAGAAAATCTCCCTACTA  
TCTCTTATCTGGTCTATACAAAAAGTTACATCCTTTGCATGCAACAAAACGTCGTCAGAAAT  
GGTTAGTGCTCCCATATCCCCGTCTGTTGCTTTCAGGTACCCCATTAACCTTAATATATGT  
TATCAGCAAGGAAACATTAAGATTGTTGTCTACACCCCCAGTTAAAGAAATCAATCTATTGA  
TTCCTGTCACCTCGTAACAATTTCGATCGAATGTTGGAAGTCAAATCCCCTGTTTTCGGGTTGA  
AACCCCTGCACTGCCCTGTGAAAGTACCTTCCGCCTTTTGGACAGACTACGTTTTCGGTGA  
CATCAAAAACACTGCAATCGGAATACGTCTTTATCGTAACATCCATTATTTTCATCAAAGAA  
TCTATAGAAGACTTTTTGATGCTTCCAACTTTTCACAATCCATGATTATCCATTTTGAGTAT  
CTCACTAACTCATATATCAAGAATATGAGTTTGTGTTGGTGAACATGCCTTCGATTTTCGATGTCT  
CTATCAAATTCGTCGAATTTACATGGGTTTTTGCAGGTCCAGCCAGCCTAAACCGGTTTTCTT  
TCCGTTCCAGTCCCTCACTCTTCCACTCTTTCTGATCACTGAGATCAATCCCATGTCATAGTCG  
CTATTCACTTTTCCGATTATTGGCAACTCTTCTATGGACAAAAATTTTAGAGTGACTGGAAC  
CTCTCTCCTTTTGAATTGAACATCTTCTTTTCCCTTTCTTTCTCTTTCTTGAATCAACCAATCAA  
ATCCGACGCCCTCAATTCTATCTTTTGAAAACCTGAATACAATATTGTGATTTGCGTTCCATG  
CCTTGTTCCACAGCCTATTCATCTTCTTTTTTCCCAAAAAGAAAGAAAGTGTCGTGGAATTGT  
CTATTTTGGAAATAGATGTCTTCTACAACTTATAAACAGAACTCTATAAACTTTCCGGTTA  
TCCTGTGTGACAAACAAAATTGGAATGTGGATAAGAGTTCTTGTTTAAAGGAGATTCATCC  
TCTGTTTTTACAGATTTAAGATCTCCTTAAGGTTTGAAGTTTGTGACCTTGTTTTTAAAGACTC  
TCTTAATTCATCCTTGAGAAGAGTCTTGGTGTCAAAACGTCCTCCTGTCATGGGGAAGGGC  
TCATTTAAGTAACTTGTGGCATTGTCTGATAAATTGACCAGGTCATACAGTTTTGATTTCAAT  
TTATCGCCAAGCAAAGATTCCACATAACACAGTCTTTTACGTTTGAATAAGAAAATCCAGA  
TATCATACTGTCTGGTATGCTGGTCATGGAATATCCATACATGGTATAAGGTAAGTACAACA  
TCATGAGGGTCGCTTCCAGTAGTTCGGTATTCTTCATGTTGAAATGGAAGAAGGCTGATAGC  
AGCTCTGATTCTAATGATCCTCGTTCAGAATTTATTACTCCTATCATTTCTTCAAAATTTCCAT  
TTCTTTTCTTCAGTTTCCCAAGCAAAGTTCTGCAAATTTACCATTTGCGTTGCGGTTGTTTAT  
GAAGTTGCAGTCCATGTCGAGTTCAAGTGAATGAGACCATCTCACGATTTCTTCTCTATGA  
CAGCAAGAGCTCTGTAATTCCTTATTACAACCTGTTTTCTTATGTCGTCTGATCTGAGCGTGG

ATGACGTGAATCCGCTGTCAATCGTCATCATTCTCTCAAGATCATCCCCCACAACACCTCAT  
TGTTCTGGGCTAATAGCCAGGACCCTCTTATATGACATGTCAATTGGCACATCCTTATAATAGT  
GGTTTTTGAGCATAGAGCATCTCCCATTTGGTTATCTGTGTCTGAGAAAGCTTTACCAAGAGTC  
CCATTTTCAACGCATAGGCTTTACGTAGCATATGATCTCGTTAAGGCTCCTTGGATTTAATC  
CTGGCTTGACAAATACTCCACATGAATCGTCACTATAGGTGGTTCCTATATATTTCTTGAAGT  
TGAGCGACTTCATCATATCTTCCATCATTAGCTGCGATTGGATTCCCCAGAGTGGACCAAAC  
CAGCCTTCAATTGCTCCTTTTTGATGCCTTGATATTACTATGTTGTCAGACATTAACCTCTCGT  
ATAAAATATGTATGTCTGAAAAAAGGTAGACAAGCATCACCATTCTTTTCTTTCTTTTGATC  
CGTCAGTGAACCCATACATGTCAGAGATTTCTCCATTATAAATAGGTTGTTTTCTGGCCTCT  
GCGAAGTGTTGTGTCTGAATAGTCTAGGAATAAAGAATACGAATTCTCTTCGTCTAATAGC  
CTTGACATCTCATGCATTATTTCTCTTCTCATCTTCTGACATAGTCATCATTTGGCCCCGGCA  
CCAATTTCAATTGCTCGTTTGATCATTTCCTAAGGACTGATATGTAAATTTTCAGTTTGAAGC  
TTGCGACACCATAAAAGCGCGCTTTCGTCTTGAGCTCTTTTTCTTTTCCACCAACCTCACTA  
GCTTAAATTTCTCAATTTCCCCTATCTTCTTTGTCTTTCCTGTCAGCCACTATTATCTCTCTA  
TCGAAGTGTTTTTTGATTTGACTAATATACATATCTTCGACCAGCTCCGGTATGTCATTGTTG  
GTGATGTAGTAGATCAATTCTTTGACTGAATTCCCTGTGAAATCATACTCATCTTTTGTGCAC  
GCCTTGTCTATCACTCTTGACGCTATGTTCACTTCTTGGCCCCGGTTGAAGCATCTGTCCCAT  
CTTATACTCTTGTAGTTGATTTGATTTGAGGTTATATCAGAATTGTAACCTCCCTCCTGCAGCC  
ATCAGATTCAAGTTCTTGTTCACATTCGGTTCGATCCTATCAGGGGGGAACCATTCATAT  
TTTTTAATGTAATTTGTTATCACTTTCATCTGAATAAGTGTCTTAAATTTTCAATTGATTCT  
TGCTCACCGGATGATTTCTGTTAGTCCTTTGTATGTATTTTTCTATTCTCCAGCTGTGTCTAC  
TTCAGCAAATGTGTTGGCTTTGTTTATGCCCCGACATTTTGATGCAAGTTTCCGCTGATGAATA  
CCTGCATGTTTTTATCAGCTTTTCCGTGAACACTGGGTCAACTTTTACAGCCTCTAGAAGAGC  
ATCAATCAGCGGCAAAGTCGACGACACTGACTTGGTGTCTGCCATCATCAAACAAAGGGTTT  
CATAGGCTGCAGCCATCTCGGTTCTTTTTGGGTTTTCCATATTTTGGAGAGAGATGATTAATT  
TTATGAAATCATTTTCTTCTATATTAGCGCTGAATTTCTCTTTGGAATTCATGTCTTTATCAG  
CGACAAAGTGCATTCGTTTTCGATGACTGTGAACAAATATTTGATCATTGTGTTGTTCCCGAT  
GAATACTATGGGCCCTATCATGATCCCGGTGAAAGTCTGGCTGATGAAAAGACTAAACTTGA  
AGTTCTCTTCTCTCTAATTTCTATTTCTGAAGTGCTTGAACCGTCATTCGAAACTTCACACT  
CAACTTTCCGTTCTCGTGCCATAGATCCGCTGAGGCATATTTTCTGTTGCTGCTTAGGCTTGA  
GTAGGTCAAGTTTAACTTGTGGTTTATAACTTCAAATAAGTTTAGCAACCACATGAGCTTTGT  
AGTCTCCACTCCTAGTTCTATTTTTCTGATTCTATGGAGTCGGGTTTCTTCTTTGAATGTTTG  
TTGAACAGCTGTTCTTTCAGTTTTTGTCTTCAAACATTCTTAGTTTCGTCAGAAAATCTGAAC  
AAAGTCTCCATCCTGGTCGACGGCCATGAATTTCTTTTCAATTCTGAAAAACAAAAAGCAT  
ATCATCCTGCTTTCCTGAAATAGCTGTCTTCCACCCACAAATTCCTTAACCTCTTCAAGTC  
TATCAGAGACCTTATGCCAAATTTTCCGGGTACAGCTTATTTCTGACCAAGTTATTCAAGTT  
CTTTTGAGATATTAGCTTGAAGGGGGAATCGATCCTAGACATCAGAGCTGGTTTGTCAATAT  
ATGTTTTCGCTCACGTACTCTTTTCCACACAATCCAATGAGAGATCCTTGATTACACTTTA  
CTTCACTTTTTTTCGGCTCCAGTTTTTCTTCGTCTTCTTGTGACACTCTGAGATCAATGAAGTT  
TTCTTTTTCATCCAAAAGCATGGACACTGTGCAAGGGCAACCCGTGATTTTCAGCTTTTTGAT

CAGAGATTCAAACCTCTTCTCCATACTTTGTCTCTGACTATGGGAATCTTCTGCTTCGTTTCGC  
ATGATTTTCCATGTCACCTTCGTTTGGCGTTGGTTCTTCTTCAATCTTCGTGGCAAAAGTACC  
ACTCTTCTTTTTATCCTCTACCTCTGCTTCATCAGCCCAATTCATCTTCTTATTTTCCTTGTTGA  
TTCCGTTGTTTTTCAATTCCTCCATAATTGTAATTTTGGCTTGTTTCCTTCTTTCTTCTTTCTT  
TGTTCTTTTTCTTTTTCTTTTTCTTTTCCCTTTTCTTTTTTCTTCTTCTTTTTTTCTTT

>Seq2 [organism=Adonis ophiovirus] RNA2 genomic sequence

GTCCACAGGCCTTCTGGCGAGTGGTTTGGAGCGAATATTGGATCTCTCAATCCTCACACTCA  
AAGTTTTTATTAAACGAAAAAGAAGCAGTCTACCGACCTGCAAATGCCATTGTCTCCTGC  
GCAGAAATATATTTCTCATCACCTACCAGACTTCATTTTTCCCTCCTTTGGTCGCCTCATTCCA  
CACATCATCCTTCAGCCACATTCTTCCCGGCTGTTTGATGTCAAACATCATCACTATCTCCCT  
GTCTTTATAAAGGAACAGCGCGCTCCAGCAGATTCCATCGAATCAACCACCTTAGCGTCTT  
CCAGTTTCTTGATGACATTATATTAATTTTATATCCTCAGTGTTGAACAGGAAAGCCTCTG  
GCAGAATGTGACTGTTTCCAAGCACTTCCAATCTCACTGCTGCTTGTCTACTCTTAAACTT  
CCACGCCTGCAGCGTTCTTGACCTCCCTGTTTGGCTTTGCCCCTGAAAAGTAAAAGTAGTGGT  
CAGGGGACCCAGTGTCCAACATCGTCATCATACCATTTCCATTTTTTATGGTGGTTCTTACTG  
CCGTTTCCGGTTTGTATCCTTCCTCCAGACTCTATACATAGCTGGAGCCATTATCTTCTCTCT  
TTCCTCCTCACTCTCACTTGAACTGTTTGCTTCGATTTCATTTCTATCAGCAGGTTTTTGTTT  
CTCCTGGCTGATTCTCTCCTCAAGGTTCTCTCCTTTTCTGAGAATTTGTTTCTTTTTCTTTTAC  
TCTTTCTTGATCTCTTCGCCGATCTTTTTGAATACTGAGCTGCTGTTAAGGTCCTTAGGTCTC  
TTTGCTGGGTCAATATACAACACCGTTGAAGCCCTAACATCTGTTTTTCATCGGAATACTGGC  
AGAGTGAGTGAAAAACGCCACATTAAGAGCAGCATATGCTCTTCCCACTATTGGAACCTCCT  
CTGCTTCAATAAATATACTTATTTTTCTCCATATCCGTCTTTTTTACAAAGAAATTCATCGACA  
ACTCAATCATGGCCATTTCTGAAGCATCAAATTTTACTTGCTGGATGACTTCATCTTTACCAG  
CTTTTTCTTTCCATCATCTATGAGTGAAATGGTGAGAGTACCATTATCTTCCTCATCTTTGTCT  
AAAGAGTGGAAGATACATAAACTGGATCTTGTCAAATGTGATGAAAGGGCTGTCTTCGATTC  
CTCCTATCTTTTTAAATGCTGAAACTATCCTTTTCATGGTGGCCAACTTAATGCTTTTTCTATG  
CTCATTTTCTTTCAACTGCAATGTGAGGGGGACAATCCCTGTATCTATCACCCCTGTGTGGAT  
CTTCGAAAAGTCCATCAATATCTCCTCAATTCCTCCTGGGAGCTCTGATTCTCCTTCTTTGAG  
AGATATTACGCTCACTTCACCTGATTTGACGAACTCTGCCCAATAGACTTTGCTTCAATCCT  
CTTCGGCCGAGAAATTGTCCCGTCATATCTGTTGAGAGAAGACATTTCTTCTATTCTGTTAAG  
ATCACTGGTCCTTAATGCGCGGGATAGTGAGTGCATCAACTCTTGTTCTCTTATCAGGGTTG  
CAAACGGGCAGATCTGTT

>Seq3 [organism=Adonis ophiovirus] RNA3 genomic sequence

ATAACGAAGCACAAATGCACCACCATCCACACTGCACCAGCAATCAAGCATGGATTTTGTA  
AATGTTCTTCAATCCCTCTACTGAAAGACCACTGAAGTCAGCATCTATATTTTCAATATTGG  
CCAATCTCTCTTCTCAGCATCACCGGTTCCGAAGAAATGAATGTCTCTCTTGAAAGCTTCATT  
CTTGTCAGAAATGATTTTTTCTGCCATGGCTTTTCTCCCGCTTTTACTCAGAGAAAAGATTAT  
CGCACATGTAAGCTTTAAAGTGAAGTTTTTTGTAGATGGTTTCGACTCTGAGAGTGGATGCA  
TCACTAACTGATTTTTGTAGCAACCATCGAGAGAAGCCAGTGTTTCTCGCAGCTCCCTAGCA  
AGTTTGATTTTCTTGTTTTCTCCATCTTTTGATACATTGCACTCACGGGAGTGTGCTCACTTA



TAGCCAATTCCTCCCGCTTGTCGAAAGAAGCTGCATACACTGCATACCGAATACCTCGGTTA  
CCAGCGACATTACAGTTTACACCTGGATGCCACGGGAAGTGGCAGCAGGTCCAAGTTCATTTG  
CAACAAAACCTCTCGCAGGAACTTAACCGTACTCACGGCACTGAGATCCTTCGCAATTCAT  
CCATAGAAATATTCTCTCCCTCATAAAGTTTATCGATTATGAAGTTCGGAACCTTCCTGTCTT  
CATGAGCTTTGTTGCCTGGCAAGCTTCCTTGGACAAATACTAGCACTATTCCTGCCTGTAGTG  
CTCTCTTCCCTTTCTTTGTGTTCACTACTATTTCCCTCTCAGTGATCCCTTCCTTCACTTCTTTT  
TCTACAAAAAGACCATTATTTGCAGCATCTTCCCTCATGCTGGCAAAAGCAATTGCGTCTAA  
TATTTTCGTTCCAGCAGCAATCAACATCGGAACATCAGCCAATCTATCCCCAAAGTGAAGA  
TTGGGAGATCACCTTGCTTGTATGTTTCATCTTCTAATCTGATAGTTCGGACAAACTTCTCTA  
GAGTGGCCTTCAACTTTTCCATATCCATAGTATAACTCTGCTGGTCGATAGCTTTGGTGATGT  
CTTCTTTGCTGGAGAGAATTATGTCCGATGACCTGGCCACATCCACCCTCATGCCAACTCTAC  
TCTCCTCCTTAGGTTCTGGGGCTAGGGAGGCATCCTTGGTGCGGGCAATAGCTTGTAGTTTTC  
CACCAACTAACATCACTTTTGCATCAGGGGTCTTGTTTTGAATATCCTCCATTAAGATACTAT  
TCTGAGTGTGTATTTTTTATCTTCCGTGATGAGACCATAATTCCTTAAGTTTTGCGACAGTTTG  
AGGTTACAGTCTTCCGAATCTACACTGAATGCATCAAAAAATTTCTTCAAGGATGACACGG  
CGATTGGAGACGACATCTTGGGATTTTGGGAATTTGTTTACTTTTGAAGACTTGCAGGTTTGT  
ACTTG

>Seq4 [organism=Agrostis ophiovirus\_agro] RNA1 partial sequence

CTGAACTAAATCAGCGGGTCGCAATGACCGTAAGGTGAAACGTCTAACACAAAAATCAATT  
GACCACTTCAATATCCTATTTCATCATCATCACAATCTGCCACATCCCCATTATCTCATCCTC  
GCCATATTCTTCCAACAAGTCATTGAAAGTGCTCAACCTTTCATTTTCCCGGATTTCTTCTTCT  
GTTGCCATGACTCCCATGCCTAATATGACATTAGTCATGCTATCAAAGTCTGACGTTGTGTTT  
TCTAATCGATCAGTCAGAGCAGTCAGAGCCCCAATAGCATCATTGAAGTGGTTCATAAAAGA  
AAAATATTCTTGATCAAGTTCAAAGAACATCTTGTCTAATTCCTCAGCAGTCATCATGTCAAC  
ATGATATCGAGACATATCAATGTCTTGTGGATTCTCTGAATATGAATTCCATATTTGANNNN  
NNNNNNNNNNNNNNNNNNNNNNNNNNNNNNNNNNNNNNNNNNNNNTTCTTCAGGTAAATTTTTCACGA  
TTAAAAGTATTTCGATTCATATATAATTTATAATGAAGTATGTTATTTCTTGTGTTTTGTCTTT  
ATGGTTTAGTATTGACTTCCTCCTTGTATTGTCTAGATTTGCAACACATAGTAACCCTTCTAN  
NNNNNNNNNNNNNNNNNNNNNNNNNNNNNNNNNNNNNNNNNNNNNNNNNNNNNNNNNNNNNN  
NNNNNNNNNNNNNNNNNNNNNNNNNNNNNNNNNNNNNNNNNNNNNNNNNNNNNNNNNNNNNN  
NNNNNNNNNNNNNNNNNNNNNNNNNNNNNNNNNNNNNNNNNNNNNNNNNNNNNNNNNNNNNN  
NNNNNNNNNNNNNNNNNNNNNNNNNNNNNNNNNNNNNNNNNNNNNNNNNNNNNNNNNNNNNN  
NNNNNNNNNNNNNNNNNNNNNNNNNNNNNNNNNNNNNNNNNNNNNNNNNNNNNNNNNNNNNN  
NNNNNNNNNNNNNNNNNNNNNNNNNNNNNNNNNNNNNNNNNNNNNNNNNNNNNNNNNNNNNN  
NNNNNNNNNTTCTCTTTGTAGTGTTTTTGTCACTTCTCATATGATACTTGTTTCTGTCATTAC  
GTTTTTTCGGTTGCTTGCCAGACTCTCCTTCTGTATTCTCTTGTCTTTGCCTCTGTTTACTC  
TGTTACAGTTTGTCTTCATTTTGATTTTTTTTGTCTATTCTTTGGGTCTGTCTAGTCCACTTCTC  
TTAATTCGTTTCCTCTTCTCTTTACTTCATATCTTCTTCTCTGAAATTTATGAATTCTTCTAT  
TTGTATGTTANNNNNNNNNNNNNNNNNNNNNNNNNNNNNNNNNNNNNNNNNNNNNNNNNNNNN  
NNNNNNNNNNNNNNNNNNNNNNNNNNNNNNNNNNNNNNNNNNNNNNNNNNNNNNNNNNNNCACTGA  
TTTATCAATGCAGAAGATAATAATGACCGATTATACCCCTTCAATTTTACTGTATTCTCTTCA

[illegible]

[illegible]

TTTAGGTGTTCTGAATATATCTAAGACCCAATAATTTTTTGCCTATCCTCAGTGATTTCCCAT  
TCTTCATTGTTTTTCTTCCACTTCCCAAGAGTGTCTTGCTAAGAGCGGAGATCTCATGATCC  
ATTAACCTTGCTAGCAAATTTTAGGAGTGCCTCTGACTCTTGTGATGGTTTGCTCTTTTCTCCCT  
TCAATTTCAATATAAGAGAAATAGATGATTCTTGTGTAGAACTAACCTCATGAATTCTCCA  
ATATCATTTTCGTGCACGGTTCAAAAATACTTCTCTAGTGAGAAGCAAGTCTATGTTATTCTTA  
TCCATCCATTTTTTCAGGATACGTCTTCTGTGATCATTTGAAGATTTTCCAAAGTTATCTCTT  
TGTATGGGCTGTCAATTTTGCAGATTAGTTGAGGTAATCTATTTTCCCAAGGTTGATTAGGT  
ATGATCCATCAATCACTGTCTTATCTGTTATGACGTGAGTGAAATCAAACCTCAACTCTTGGA  
GATTCTTTTTTCTCCTCATCTTCAATTGTCTGGATCAGAGAGTCATATTCCTTGCTGAACTTGC  
CTAATAGCCCTACTAGATTCGGTGTATCGTAATAGCACAAACCATAGGTTGTCATGAACTT  
TCCATATTTGCTTTCTTATACTCGTGGTTTTGCTCGCAGATTATTTCTGTGATCTTTAGAAC  
TTGAATTTGTAATCTTGTGGTGTATCCGCATTTCACTTCTTCCCTTTTATTTAAAACCTTTACT  
GTCCTAACATTTTCGTTAATTCACCTTCGACTCCCTTCTCCCTATTCTCTTTGATAATGGAGAA  
GTTTCTTATATTTTCTTCTTGTATTTTTTCGTTGAGGTTTAGTCAAAGTAGCTGAATATTTGGG  
AAAGCGATGTATTCACAACTTCATACAGTTGTTCTCCATGATATATCACCATCTCTTCAATT  
CCAAACCTAAAATAGTATGATTCAACAACGTCTTTCAATGAATTTGCAAGCACAAATTTCAAT  
GTCACCCACTGAATCAACATCGACTATCTTATTGTTACTCTGTATAAGAATGACCGATTTTTT  
ATGGAAAGGATGTTTTAACTCCTTTTCATTCAACAGCCAAGAACCAACCAGAAATCTATAAG  
TAGAACGATAACTAGTTTTATATTCACACAATTCATAAATGATCTTTTATTCCTCTTATTTAT  
CTTCTCATTGTCAATTCTAATCTCTCTCAAATTCATTGTTTCCCTGATGTCTCTGTGAATAATC  
TTAGAAGGATCACTATTTGACAATGATCTGGGCTCCATGTAACTCAAAGATTGTTTTTGATC  
TAGATGGTTTCTTAGCTTTGAAGTTTGTGTAGTCAGGTAGCTATTTAATTGTGTTA

>Seq5 [organism=Agrostis ophiovirus\_agro] RNA2 genomic sequence

CAATATATTCAGGTGTTAGTTAAAACCGTTTCCTGACTAACTGATGTTTCCTTGGGGCAGTCAT  
CCTGTATCCATAGGGAGTTTCAGAACATACTAGCCTTTCCAGGAGGTCTCAGCAGGCTGCGA  
TAGCCGGACCGGAAACACCATTACTGATGCTTCGAACAACCTTTTTATTTAAAACATCAAAA  
TGCAAAAGCACTCATAGTAATCACACACAAGACAATCTCGATGTCTTACTCAACCAGGATAG  
GTCACTATGCAACCACTTAATACCATCTACTTCTATTCTGCAATCGGCTAGCCACTTTCAACA  
AGCATCTGAAGACTAAGCTCATCAGACGTCTTAAACACCATATAATGACCACTACAGTCCAA  
CTCGAATATCACCTTCCCATCTTTGCACAACACTGCAGTTTTCTCCTTATCATATGACTGCAT  
GCTGTCTATGATTCCCTCCTTCTGTAGTTTCTGTAAAGATATCAAAGGGAAGTCTGGCTTGTC  
ACCAGGTAAAGAATAACAAATCTCTTTGAATTTACCCAGTGCTGCCCTAGCTTTATCTCAA  
CCCCTTTCACATTGTAGTATGTGATTCCCCTTTCATGTTGTGCACCTCTTGGTTTCTCAGATAA  
ATTAATCAGTCCTGGGTAATAGAACCAGTGGTCAGGTGCTCCTGTGTCCAATGCGATCTTAT  
CGGGATGGATAAAGGGCAACCTCCTTGGTAAGTAATCAGATATATTTTTCTCTGATATCTTAT  
GTATTTCACTCATTTCTGGCATTCTTTTCGATGCATATTCCTGAGTCTGTCCTTGATGAACTTCT  
GATCTTTTCATCTCCCATCGTCAGAGATCTCATGCTCCCAGTGAATCTCATGCTTGACTTCCT  
TTCTTCTTCTTCTTGATCGTATTTATCTTCTGCTTTCTCAAATCTCTCCTTATTGTTTTCAATCC  
TCCTATTAACCTGTGTTGACTATTCCTTTCAGTGAGGATGTCTTGTATATCCTTTGGTAACTC  
AATGTCGTCTATCAACAGAGAAATTGGCTTCTTAACTCATAAGTTATTGGTAAATATTAC

CCTGAATGTAAAAACAACAAACCATGAATCCAAAAGCACGCCCTTTTACAGGAACTCTCTTC  
ACCTTGTAATTGAACTCTATCATGCTTAGGTGTTCACTCGGGATGAAGTGGTCAGCGTATAG  
TTCAATCATACTCATCTTGTTTCAGATAAGTTGATATGCTAGAAATAGACTTTGACTTGTTTCC  
AACCTTCACGGAAGTATCGTTGATTGAGAACGTGATCTTCTCTTCCTTGGCTTCATCCCTAGA  
AAACAGAGGGGAGATAGAGTATCTTTAGTCTTACAATCCTATAAAATGGGTAACCTATGACCCG  
CTATTATTGTCTTCAGATTATCCATAGTCCCCAACTTCACCTTCTTCGAACCCTCCTTAGACTC  
TGCAGTCATCTTCATGGGAGAACTACTGAGCTAATCTTTCCTTTTATTGCATCTTTGAACTC  
TGCTGCCATGCATTCCACTTCTGGTGATATCGCTCCATCAGTGTTCAACGAAGCCAAAATTGT  
CACTCCTTCTTCCACCATCTGATCTGTTGCTTGGGAAAATTTCACTGCCTTCATGTCAACTAG  
CTCCTTGTTTCGATTTTTCTTCCTTGCCATTGAACAGTGATGAATTCATCTTGTTTCATCGTACTT  
GTTGATCCCATTGCCAAAGGTAGTCTTGCGTGGACTTGGATTTTTATCAGGTTATTCTCTTTC  
ACCGTAAGATTATTCACCCGTGATATGTTTTGCATGTAGATACGTTGGCTAGCGTGCTTGTTA  
AAGATTATGAGGGTTTATAGTTTTCGAACGTTGCTCTCTT

>Seq6 [organism=Agrostis ophiovirus\_agro] RNA3 genomic sequence

TATTTAAAGCTATCATTGTTTCAGACTCCAAAGTCGCGCCTTCAACTCGTCTTAACCGTGCTCC  
TTCTCTCTCAACAAGTCCATCAGCTCGTGAAGTCGTAATATTTCACTTCATCCAGACTTCCC  
CCATGCAGTTTTAATAGCATCGACAGAAAGTTTCAGAGAAGTCTGCGTCAGAATCAAAGAGT  
ACTCTGTGTTCTGGTTCATTGATTTGGTTCACAGTACCATAGAAGTTTGCATCCTTTTTGAAC  
GCTTCTATCTTTCCATCGTTTATTGCTTTCCTCAAGTCCAGTCTCCCCTTAGGCGAGAGAGAG  
AATATGATTGCACAGGTCAACTGTAAAGTCAAATTTCTTCTCACTGTCCTTTTCGGGTTAGCA  
GGATTCATGTGTTTCTGGGCTTCGAAATCAGATGCAAGTGCTGAAAGAGTGTCTCTTATCTTC  
TGAGCCTTGGTCAATTTTTCGCTTTCTGTTGTATACTTAACAAGGGCATCAGTATCAGTGCTC  
GTTGGTTTGGTGATAGTATTCTTCTCAAACCTTCATAGAAAGAGTCGCATATCTGATTGCTCTG  
TTCCCTGCAACTGACATCTTGACCTTGATGCGACTTCAGTGGGCAAGAATTTCAAGGTCTATT  
TCCAAAAAACACCTGCTGGAAACAGTCCGGGATCAGCAGTGGAGAGCATCTCTACGAGCT  
TGTTTGCAGTCAGTTCCTTTGTGCCTTTAAACAAGGTGTCCTTGATGAATTTAGATAGATTCT  
TTTCATCTGAGGTCCTGGAAGGTAACGAACCCTGATTATAAACCATGCAGAAAGATGCAAGT  
AGTGCTTTCTTTCCTTCATCCATCCTTTTTTGCTATTTCACTTGTGTTACCGTCTTAGGGGACA  
GTTCTTAGTTACGAAGATAAAGTTGTGATCTTTAGAAGATTTATAAGCCATATACATTATG  
GCGTCCAGTATTTTAGTTCCAGCAGACAAGAGGCTGCTGATGCTGTCTTCAACACCTGAATA  
CCAGAAAATTGATATGTACCCGTTTTGTATGTCTCTGCTGTTTTTGGCAAATCTTTTACATA  
GGTTTCAAGCACTTTCTGTATTTTACTAGAATCAATTGTTAGGCTCTTTACTTGGATCATCTTT  
TTCAATGCTTCTGCAGAGAATTTACATCAAGTCCAGCTTCTTCAATCTTATCATCTGTTTTA  
ACTGTGCTGCTTGCTTCTCCTTCCTTCGCTTTTGCCTTTTCTTCTGATCCTGTGATAACAGCAG  
TCGGTGCTGTGAATTCCAGGGTACCTTCAGGCTTCAAGTACACTAAGTAACTTGGAGTCGTT  
TTCTCAACTGCTTTCAGTGCATCAGTCATCTTTGTGTTACAGTTTCATCAGTGTTCAAAACC  
TTGATTGATTTTCATGAACGTCTTCTCATCAACACTTAATACAGGTTTCCTGGCCAGATCGAGC  
ACTTCCTTGACAGTTTTGACTCCTGACATTTTCGATTTCTCTCTAGTAGCTTGATTTAAAGTGA  
AAGTTTGAGGTTGCTTATTGCTCGACAGTTGCT

>Seq7 [organism=Agrostis ophiovirus\_agro] RNA4 genomic sequence

ATTTAAAACTTGACAAGATCAATACCTCACATTGACTATTATTCTCTAATCTACCCATTAATC  
GGTATCATACTGATATGACTCGAAATTATCATGGAAGTTATCTTCTCGATCAACCTCATAAAT  
CTCCCAATACTCACGAAGATAGCTTCCATACCAGCTTTCGAAGCATTTCGAAATCTTCTCGAGC  
ATCTGTGTGCATTTCAAATATCTCAGATAAAAAGATTGCTCCTGATCTTCCTTGGTATCTTCAC  
TGGACGATTGTGGAAAGTCTCGAATCTTACATCGTGATATATCACGATAAGGTAGTTCAAGT  
CTATCTCAGTGTCTCTCTTAAAAAGTTCTATCACTCTGTAGAGATTCAATTTGATAACCTTAAA  
CTTTTGAATTGTGTGTTATGTTTCATCTAACCTTTTATTTAAACATTGAAATTGTAATCCATGT  
GAATTGATCAACCTGATTCCCTGCTTCTCTCTTTGTCTCATCACCCTTCTCACCTAACCAAC  
TGGGAAGCATATCAACTTGTTGAGGTAAAATGAATCAAACCAGTTCTCTAACATAGCTAGGT  
CACGTTTGGCATCAGAATGTTTCAACAGGATTTCTGACAATGACCAGTCTCTCAACACACTC  
TCCATGAGAAAGTACTTTCCACACGTTTCATACCTAACATCACGATATATCAATATGAGATA  
GCTGAGATCAATATTCATATGTTCCCTGAATAAGCGTATTACAGTGTAGAAGGTCATTCCTA  
TAGGATACACTTTGCTATCTCGATAGATGTATCCCATTACGTGGTTAGGCATCATCTTATTAT  
TCATTCACTACTGTGATTGTTCACTTGTCTTTTCATAAGTTAAACAAAACTATCACCACCAA  
GGGATATCTCTCGAAAGCAATCTTGTAACATCCTTCTCAATCTTCCTAATTCTTGCTGCCTCA  
GCTTCAATAGGGCGCCTTGGATACATGTAATCAAATAATTGTTTGTCAAATAGACTTGTAGT  
AGTCCATAATCTCATCATTATAGATGATTCTATTATCAACTTATCCATTATATCTTCCAATAA  
AGAAGGATCACCCCTATATCTAGAGATTACAGAGTACCTTCCACTTGGAAAACCTAGCTCGA  
AGACACAATCCACTCTTTGTTTCATAAACTGTGTGAGGAAAACATCCTTTCTAAGGCCTATA  
GAATTCCAAGTAAAATTAATTACTCCGAATAAGTCTAAGCAGGAGCTATTATTTAGGTTCTC  
AAGTGAATACTTTCTCCATAGCCTTTTCTTCCATGTGCATGATATCTGTCAATGACGTATAA  
CCCTGGACCTGTCCTTCTAGGATGCATCTTCATCATGTAATCCAGCCCTTCTTCTAGTGTCTT  
ATCAAACCTTTCTTGATTGGGTTAATTGAGAATCTTTCTCGTGCAAGATTAAGCTGTGCTCC  
ATTCCTTCTGATAGAATATTACAAAATTGTTTTTCTCAAAGCACCAATAGATTCTAAGCTT  
TCAGTCATTTCTTCGAACAAAGGAACCAGCATATCTGTCAACATGTGATTCTGCAACCGATT  
CAGCTGGTCCTTGTAACGCATAAGAATCCTTGTCCTATCCTCTGACCTCAACATGATAGTGTT  
TGCTTGTCACTTGACATGTATTTGAATTTCTCATCAATGAACGAAATTCTGTTTCTTAGTGA  
TATCTCATCACTGTTTTCCAACCTGATCAAGACCATTGAAAGGCTTGAAGGCGATGTTCAAGA  
TTTCTCTAATATGTGGAACAATTGCAACTATTTTCGAGAAAATAGGCTCAATCAAGGAATGC  
CACTTCAACGAAAACTCATCTTCTGAAAGTCTGTTAGTGTCAATTTTATACTGTTTCAGCTCT  
TTGATTCTTTTATCTTCTGACCTTAA

>Seq8 [organism=Agrostis ophiovirus\_poa] RNA1 partial sequence

ACACAGGCCGTTGTCTATCATAAATTGTTCCATATTTTTCTCTTTGTTTTTTCTGGTTTGA  
TCTAGTCCTTTGTGTTTGTATAGAAGTTGAGCTTTGATCCGGAATTTTTCTTGTTCTCACGGC  
CCCTTTTGTGTTTTATTTAAACATCACCCATATCATGGATCCTGACTTATCTCTTACTTCC  
TCCTCCTCTACATCCTTTAATAATGGAGAAGTTTCTCACATTTTCTCCTGTATCTTCCTCTGA  
GGTTTGGTCAAAGTTGCAGAATACTTTGGAAGGGCAATACAGTCGCAGACTTCATACAATTG  
TTCATTGTGATAAATTACCATATCCTCGATTCCAAACCTGAAATAATATGATTCCACCACATC  
TTTAGAGAATTGGCAAGCACAATCTCAATGTCACTTATCGAATCTACATCAACAATCTTACT  
ATTGCTCTGAATAAGAATAACTGATTTCTTGTTGAAAAGGATGTTTAAACTCTTCTCATTTAA

CAGCCAAGAACCGACTAAGAATCTGTGAGAGGAACAATAACTGGTTTTGTAATCACACAAT  
TTCTTAAAGGATCTCTTATTTCTTTCATTTATTCCATCATCATCAAGTCTTATTTCTTTAAGT  
CCATAATCTCAGTTATGTCCCTTTCAGCAATTTTTACTGGACAACAGATCAGTGGATTGCTGG  
CTTCCATTTTAGTATATGATTTGCTCAAGATTTTGATAGTTTCTTAGTTTGATGGCCTGTATTG  
GTCTGTGAACCCTTAATTGTGTTAAAAAACTATCAAAATCTTGATTTGCTCAAGAGATCGGA  
AGA

>Seq9 [organism=Agrostis ophiovirus\_poa] RNA2 genomic sequence

TATATTCTTCCTAACTGGTTTACCTTGAGCTGTCAATTCTGTGTCCATAGGGAGTCTCAGAAC  
ATACTAGCCTTTCAGGTGGGTTTCAGCAGGCTGCAATAGCCGACCCGGAACCACCATTACTG  
ATGATTCAACCAACCGTTTTATTTAAAACATAACACTGCAAGAGAGTAAATTACAATCACAC  
AAACACGCAATCCTGACATTTTATTCAATGAGAATACGTAACAATATACTCATTTGATTTTCGT  
CTTTTCTCCCCCTTTAGTACTCTATTAATTGTTTTCCACAAGCATTTGAAGACTGAGCTCATCA  
GAATTCTTGAATACCATGTAGTGTCCACTACAATCCAATTCAAATATGACCTTTCATCTTTG  
CATAATACTGCAGTCTTTTCCTTGTCGTAGGATTGCATGCTATCTATGATACCTCCCTCTTGC  
AGTTTCTTGTAAGAGATCAGTGGGAAGTCAGGTTTGTGAGCTGGCAAAGAATAGCAGATCTC  
TTTGAATTTACCCAGTGCTGTCCCAACTTCACCTCGACTCCTTTTACATTATAATATGTTGTC  
CTTCTTCATGTTGTGCTCCTCTTGTTTTTCCACTAAATTTATCAGTCCTGGATAATAAAACC  
AGTGATTAGGTGCTCCAGTGTCTAATGCTATCTTGTCTGCATGGATAAATGGTAATCTCCTAG  
GCAAGTAGTCAGATATATTCTTTTCTGATATCTTGTGCACTTCACTCATCTCTGGTACCCTCTC  
AATACATATTCTGAATCTGTTCTCATAGGATTCCTAATCTTTTCTCCGCCCATTTGTTAGAGT  
CTTTAAATTTCCCGTAAATCTCATGCTTGCTTTCCTCTCCTCTTCTTCTTGTTCGTATTTGTCTT  
CTGCTTTCTCAAACCTTTCCTTATTATCTTCTATTCTTTTATTGACTGTTTTCACTATCCCTTTC  
AGTGCTGATGTCTTGTTGATATCCTTTGGCAACTCGATGTGTCGATTAATAGAGAAATTGGC  
TTCTTGAATTCATAAGTTATTGGCAAGTATTCTCCCTGGATGTAGAAGCAGCAAACCATGAA  
ACCGAAAGCACGCCCTTTCACAGGAACTTCTTCACTTTGTAATTGAACTCTATCATGCCTAA  
ATGTTCACTCGGTATAAAGTGGTCAGCGTAGAGTTCGATCATGCTCATCTTGTTTAAATATGT  
AGAGGTGCTAGATATAGCCTTTGACTTGTTCCAACCTTTCACAGAAGTATCATTTATCGAGA  
ACGTAATCTTCTCGTCTTTTGCTTCATCTCTAGAGAATAGAGGAAGATACAATATCTTCAGTC  
GAACAATTCTATAGAAAGGATAGCTGTGTCCAGCTATTATTGTTTTCAAATTGTCCATTGTTC  
CCAGCTTAACTCTCCTTGACCCCTCCTTGGCGTCCGCAGTCATCTTCATCGGAGAACTACGG  
AACTTATCTTTCTTTTATTGCATCCTTGAATTCTGCTGCCATGCATTCCACTTCAGGTGATAT  
TTCGCCACTAGTGTTAAGAGAGGCCAAGATCGTAACACCCTCCTCCACCATCTGATCTGTTG  
CTTGAGAGAATCTCACTGAACTCATATTGATTAAGTCTCTGTTACCTTCTCTTCTTTCCGTT  
GAACACAGATGAGGTAACCTTGTTCAATTGTGCTCGTTGATTCCATTATTAAAGGGAGTCTTG  
CGTGAACCTTGGATTTTGATCAAATTATTCTCTCTGACCTTAAGCTTGTTACCCGTGAGATGT  
TTTGCATGCAGTCACTTCGATTGGAATGATCGTTTAAGGTTTAGATTGCTTATAGCTCGAT

>Seq10 [organism=Agrostis ophiovirus\_poa] RNA3 genomic sequence

GCTATCATTGGTCAGAAGCAATATGTGCACTCACACTCCATCTTAACCGCACTCCTTCTCTCC  
AGACAAGTTATTCTCTCTTGAGTTCGTAGGAAGTTCACATCATCCTTGTTTGCCCCACGCGG  
TTTTGATAGCATCAACAGAAAGTTCAGCGAAGTCAGCCTCAGCATCAAAGAGCACCCGGTG

CTCTGGTTCATTGATCTGGTTTACAGTACCATAGAAAGTTGGCATCCTTCTTGAATGCTTCTAT  
TTTCCCATCATTAATTGCTTTCTCAAGTCCAACCTGCCCTTTGGGGAAAGAGAGAAGATGA  
TTGCACATGTCAATTGCAAAGTTAGATTCTTCCTAACTGTCCTTCTTGGATTAGCAGGGTTCA  
TGTGCTTCTGAGCTTCAAAGTCAGATGCAAGTGCAGAAAGAGTGTCTGTTATCTTCTTAGCCT  
TGGCCAATTTCTCTACTTCTGCAGAATATTTCACTATGACATCAGTATCAGTGCTAGTAGGCT  
TACTGATTGTATTCTTTTCAAACCTTCATTGAAAGAGTAGCATATCGAATTGCTCTATTCCCTG  
CTACAGACATTTTGCACCTTGACGCGACCTCAGTCGGTAGAACTTCAGATCGATTTCCAAG  
AACACACCTGCTGGGAATAGTCCAGGATCAGCAGTGGACAACATTCCGACCAACTTGTTAGC  
AGTCAATTCTTTAGTGCCTTTGAACAATGTTTCCTTGATAAATTGGAGAGATTCTTTTCATC  
AGAAGTCTTCGAAGGGAGAGAGCCTTGATTGTAAACCATGCAAAATGATGCAAGTAGTGCT  
TTCTTCCCTTCATCCATTCTCTTAGCTATCTCTCCAGGGTTCAGTGTTCGGTGACAGTTCTT  
TAGTGACAAAAATGAAGTTGTGATCTTTAGAAGACTTATATGCCATGTACATGATAGCATCT  
AGTATTTTAGTGCCAGCAGACAAAAGGCTACTGATGCTATCCTCAACCCCTGAGTACCAGAA  
CACTGAGATGTCACCAGTCTTGTATGTTTCGGCTGTTTTTGGTAGGTCTTTGACATACGCTTC  
AAGAACTTCTTTAATTTTGCTAGAGTCAATTGTTAGACTTTTTACTTGGATCATCTTTCTCATT  
CCCTCAGCTGAGAATGCTACTTCGGTTCCTGCCACTTCAGCTTTGTCATCCGTTTTTTCTGTGC  
TGCTCGTTCCCATGTCTTTTCCCTTACTTTTGTCCACAGATCCGGTAGAAACAGAAACCGGTG  
CTGTGAATTCCAGGGTACCTTCAGGTTTCAAGTACACCAGATAACTCGGTGTTGTTTTCTCGA  
CAGCCTTCAGTGATCAGTCATTTTCGTGTTACAGTTTCATCATCGTTCAGGACCTTGATCG  
ATTTTCATGAAAGTTTTCTCATCAACACTTAACACGGATTTTCTGGCCAGATCGAGCACCTCCT  
TGACAGTTTTAACTCCTGACATTTCTCCTTCTCTCTAGTAGCTTGTTAAAAGGTGAAGATTG  
AGATTGCTTATTGCTCGAC

>Seq11 [organism= *Agrostis ophiovirus\_poa*] RNA4 genomic sequence

CTCAGTCGTAGTCAGTCCTTTATTACTTGTTTCTTAACCGATTTCAGAATGCAGTTAACTTGTC  
CAAGTAAAATAATTCGAACCAGTTTTCCAACAGTGCCAGATCATACTCAGCTCTAGAATGTG  
TGAACAAGATCACCGATAAAGGTAAATCCCTCATAACTCTCGAAATGAGGAAATACTTCTCG  
ACCGTTTTCGTATCTAACATCATGATATATCAGAATGAGATAACTCAGATCAATACCTTCGTG  
TTCTTTGAATAAACGTATCACAGTATAGAAGTTCATGCCTACAGGATAAACTCGATTATTCTT  
ATAGAGATGTCCCATGATGTAATCAGGCATTTTCTTGTTATTCCTTCAACTCTGTGATTGTT  
ACTCATCCTTTAGTTATTTAAAACCAGACTACGGCCACCAAGGTATGTCTCTCGAAAGTGAC  
CTTGTGATTTTCTTTCAATTCTCCTGATTCTAGCTACTTCAGCCTCTATAGGGCGCCTAGGGT  
ACATGTATTTCGAACAACCTGTTTATCAAAAAGATTAGTAGTATTCCAGAGCCTCATCATTATG  
GATGATTCTATTATCAATTTGTCCATTATATCTTCTAGCAGGGAAGGATCATTTCTTTCTCTTA  
AGATCACAGAGCACCTCCACGTGGGAAACCTAACTCAAAGACGCAGTTCACTCTCTGCTTC  
ATAAATTGGGTGAGGAAAACATCTTTCTAAGATTCACAGAATTCCAGGTGAAGTTGATAAC  
TCCGAATAAATCTAAACATGAGCTATTATTCAAGTTTTCAAGTGAATATTTTCTTCTTGATT  
TGCTCTTCCAAATGCTTGATATCTATCAATGACATATAGACCTGGGCTCGTCCTTCGTGGGTG  
CATTTTCATCAGATAATCAAACCTTCTTCAAGTGTCTTATCAAACTTTTCTTGATCGGATC  
AATCGAGAATTCTTTCTCATGCAAGATCAGGCTGTGCTCCATCTCCTTTAGATAGAATCTCAC  
AAAGCTGTTTTTTTCTAAATTACCGATAGCTTCTAAGCTTTCAGTCATTTCTTCAAACAAGGG



TATCAACATATCAGCTAGCATATGCTTTTGCAATAGGTTTCAGCTGATCCTTATAACGCATCAG  
TATCCTTGTCTGTCTTCAGATCTCAGCATGATAGCATTTGTTGTGTCATTTGACATGTACTTA  
AATTTCTCGTCAATAAACAAGATTTTATTCCTCAATGACATTCATCGCTAATTTCTAACTGG  
TCGAGACCATTGAAAGGTTTAAATGCAATGTTTCAGTATTTCTCGAATATGGGGAACGATCGC  
TACTATTCTCGAGAAAATAGGCTCAACCAGGGAATGCCACTTCAGTGAAAAGCTCATTTTCC  
AAATTTCTGCTAATCTCAGCTTTCTAAGGTTATGATTTTTGAGATCGG

>Seq12 [organism=Allium ophiovirus] RNA1 genomic sequence

CATAATTTGCGATCCTCACATTGAGAAGCGACTTTTTGAGTACACAATGTACGCCAACTGGA  
AAATTAAATGTAAAAGAATGATTTCTATTGCGAATCTTAATTAAACATAAATTTAGATTACA  
TAATTTCTACTAATAGTCTTCATATTCTTCATATTCTTGGTCAGAAAGATTTTCCAATGCATC  
TTCTAACTCTTCATACGTCATTGTTGTGTTCTTCTCATAAGTTTCGATTGAAGTATCTGTTATA  
AAGTTATTCATTAATTCTGAAACCCAGATTCCATATCACCAATCAATTCACAACTAGGATTC  
ATGGACATCTCATTTTGCAGGCTTTCTACAAAGGCATCAAAAAGATCATTTGATTTTTGATTC  
TTAAAATAATCTTCTACTGTGTCAAAGGATGATATGAATTCAATCAGTTCTTTCTCTTCTTA  
TCATTGATTCTTCTTTTGTGATGAGATCTTAACAAATCTTTAATCTTCATATAATTATAAGAA  
ATATTTAATGCCAAATTTCTATGTATTCTTGTTATACGATTAATTATTAGTTTGTAATTAAGG  
CAGTCATATCGCTTTGCTTTTGATTTATTTTTTCATTAATTCATTCATATTTGGTTTTTTCATGCC  
TGAAATGATCATTAATCCTTCGATTATCTTCCAGATTTATATGCTTTTATAGCAGTATGAGT  
TGTGTGATAGAGCTTATCAATTGTTCTTGATTGATCAGGTTTGAGCTTAGACAAATTCAAATT  
TTCTAATATTTCTGAAGAATATATCTTGTCTATTATACCTTCTGATAATTTGTGCATAAATTC  
CACATTATGAGTGAATTTGGAGTTACGCTCTTATGTGATATTACTAATTTTGTTAACTCAAAT  
ATTCGCTCTCTGTAAATTTTCATAAGATATTATGAACCCTTTAACACCTATGTTTCCTATAT  
AATTGTTTACTATCAATGTGTCAGGAAAGTTTTTTGATTGTGCTTCAAGGTAAGCATGTTTAT  
AATTTGTAATTTTGTAGTCAGCTGCTATTAATAACCTCGGATTATATATCTTCAATTTTTCTTT  
CTCTATAAGTTCTTTTATGAAAGCATTATTTTTCTTTGAATCATCATCAAAAAGATTTTCTGG  
GTATGGAACGGGTGTAAAAATCATGCTTTCTATATCTACCTTAGATTTTATTTTCATCTTCTAT  
AAAACAAGGCATTTCTATGTAATCAGGGTCATTTGATATCAACATCTCTGTCAATTTGCTGTC  
CGAGATTAACCTCTTCTGTATGATCTTTTGTATTACTCTTATCGTTATCAAATAGATTCACTTTA  
GACATAGAATTTATAGAATTGACCAATTTTCAAGGACAATTGAATCTGAAATTTTATTTTTC  
TTACTTCCTTTCAAATCAATTTTCTTTCCTGTTGGATCATGAATTAAATAAATATATCCAGGT  
GATTCTACTGAAGGTATCATTATTTCTGTTTTGCCTAATGACAATTTTCTATTATCTCTTCTG  
TCATATATTTTCATAATTGAATTGATCCTTATTATTATCCTTTTATTGAAAGAGCAGAGTTCAT  
TGATCATTTTCTGAAAGCTTCTTTGCTTTGCTATTAATAATGTGAAATATCGATCAAAAAGATAT  
CATAATTTACATATTGTATATAATTCTCTCTATCTGTAATGTCAATAGATGATTTAATTTCTGT  
CATCCCTTTAATTCTATTAATTAATTATATCCGTCATTCCTAGATACACTGTTGTGTTTTATA  
TTCAATAAATTCATGCATAAATGTGAGTCACCCCTTCCTGCAAATAAATCACATATCCTATCA  
GTTTTCTTGATGAAATTTGACTCCATCAATCTTTTCATTGCAGAAAATATTGAAGGGAAAAC  
GTCAGACATTGTAGGAGAAGATACATTTTTTGGCTTACAATTCATAGCACATATCATCTCAA  
ATCCTTTAATTGCAGCCATGAATCTCTTTTTGTCCAGCAACTCAATAGGATTTATCTCTATCA  
TTTCATAATCAATATCATTTGGCGTATTTTTTGTAAGGATCATCTTCACTCACATAATGTT

TGACTTCTTCATTATAATATGAGTTCAATTGATATTGCTGGAATGATTTATATTGATATTCTTT  
TAAAATTTCTGATACTCCTTCTCTTATCTCATAACATTAAGTACCCTGAAGTCGAAATGCCAT  
CAACAATAATTCAGATATCCTTTTATCTTTAATATGAAAATGCGCTTTGTTATTCTTAATTCTC  
CTTAAATTGTTAACCCCGTTCATGATTGTCATTGTCTCATTTATATTTATTCTATATTCACCTA  
TTCTCAATTCTTCAAGACGATAAACTAACTTGTAGAGATTAAGAATAATTTCAACAACACA  
TTTCTATAATCCTTTGAATAACCTTTTTACAAAATTTCTCTTGTCAGTTTCCACCTGATTCAT  
TTGGTCTGAATAATTCATTGTAAAGTAGACTTCTGATCACACTTCTTGTTGGTGTCTCATTAT  
CAATTATATTGAGTCCTTTATAAAATCTGTAAAAATCATCAAAATAAGTATAACGATTTGAG  
TAATCCTCTAATTCAGGTGCTAATTTTATTAATGTTTCATCTGGTATTGTTTCTGGAGATAAA  
ATTCCTTGATCTTCCATGTATTTATGCACGGATCTGAATGAATTCTGTCTCATTATTATTTTCAT  
TTGGTATTGTAAGTGAATGATTTATGAATTTCCCTGTTATATTATCATCGGTGGAAATAAAAT  
AAGAAAAGCTTTTATACAGTTTCGCCTTTGACCGTATTTCTTTCAATTCGGTTAATATATTGT  
CATTGCTATAGAATGTTGTGATCATGTTATCAGGTTTCATATTACTCAAGACAAAAGATACA  
TCTCTACAATGTTTTAAGACATCATTTTTTCAGTCTTAATGGTTGCAACTCATAGGAACTTGG  
TTTATGTAAGTGAAGATGCTTTTAAATGACATCATCAAGTATTGCAAGTTGATATTATTATCA  
ACTCCACCGGTTGATTCTATTAATCTTTGGACTCCTGTAATTTTCATATTTTTGTGTTTCTTCAT  
TTGATGAAAGATCTCCTGTTTTAGGGTTAAACCTGCTGAGACAGCACGGTGAAAATATCTT  
CCTCCTTTTGGCGCTACTACATGTTCTGATAAATCTTTAAATGTTACATTTGAGAATGTGCTC  
AGAGTACTGTGAGATATCTTGACAATGAATTTTTGTTCCTCTGAGCATTGACTATATTTTC  
TCCATATCCATTATTATCCATTTACGTATCTTACTAGTTCATAACTTAGGAAAATCAATTTA  
TTTTGAAACATGCCCTCTATCTCTAAATCTCTGTGCAATTTTGTCTTATTAACATTAGTTTTTG  
TTGGAGGTCTTAATTTTCGAGTTTCATCTTTTCATTCTTTGCTTTACAGGCACTATCTGGCCATT  
TATTTTCATCGGACATTATTTTTCCAAGTAATGGAACCTTCTTCTATTTTCAAAAATTTTATCCTT  
ATGTCATGTTTTTTATCTCTTAGCTTGAAATGTTTTTTTACATTATCTCTTGCTTCAATTATTCC  
TTCATAATCCAGTTCTATCTCATTGAAATTATTTTGTATTGAAATTCAATTTTATGATTTCTT  
TCCCATGCTTTGTTCCATAATTTACTCACTTTTAAATTTTCTATGATGTAGCTGAAGGTTGTAG  
AATTATCAATCTTTGAGTATATTTTCATCAAAATGGCTAAATATTGAACATTCATAGAATTTGC  
TGACTATCCTTGCAGAAAAACACTCTTTAAATGTTGTTATCAATTCAGCTAAATATTGTTCTT  
TGTCTAGTGCCCGCACTTTATTGTGTAAATTTAATAAGTCACTATTCTTGATTCTAGATGGAA  
GAATTTCTTTTAATACATCTTTCAATAATAATGAGGTATCATGCCTTCCTCCTATCATAGGAA  
ATGGGTTATTAATATAATTTGTCCCATCTTCTGAAAATTCTATGAATGAGTATAAATGTCCTG  
TAAGAAAGCCTCCTTCTAATATAGACTCTATATATGATATTCTTTTGATATTAGATATCGAAT  
ATCCTGATAATATAGCATCAGGTATAGGAGTGCATGCAAACCATACATTGAATAAGGCAT  
ATAAAATAGCATGAGTGTGCTTTTTAACAAAAATATATTTTCTTGATTGAACAAGAAAAAAT  
CATTTATTATATTCTCTTCTGATGGTAATGAGATTATGTCATTGAATTTTCCCTTCCTGTAATA  
AATTTTTGCTAAATAATTTTCAGCAAAATGAATTCAGGTAATATCGATGATCTAGGTCTAACTG  
CAGATAATAAGAGAATCTCATTATTTCTTTTCTTATGATCATTATGACTCTATAGTTCCTAAT  
GATTGTTTGCAATTTATGATTGTTTGATCTTGAACTGAAGAAGTGTATCCACTATCAATGTT  
TTAATCATTTCCAATTCATCTCCCCATAATACTGATGTGTTTGGTGATATTCCCATAAATCTT  
TTGTAATTATTTTCTATGGCTCTTCCTTTAACATAATGGTTCCTCAACATTGAACATCTTCCAT

TCGTGACTTGGGTTTGAGACAATTTGACCAATAACCCCATTTTAAGTGCATAAGACTGAACT  
CTAGATATAATATCATTAAGTTTTCTTTCATTCAATTCTTTTTTCGATGAATACTCCACAAGAA  
TCATCACTGTAAGTAGTGGCAATATAATTCTTAAACCCTAATGATTTGAACATGTCCTCCATC  
ATTAATTGTGATTGTATTCCCCAAAGAGGGCCTAACCAACCTTCTATAGCACCTCGTTGATAC  
TTGCTCAAATAGACTGTGTCTGAATAGGGATTTTCATAAATGACGTCTATGTTATTGAATACA  
TAAAGTACTTGCAAAAAAATGTTTCCTGGCATCTGAATTGTCATCAAACCCATACATGTCTGC  
AATCTCTTCCATGATGAATAAGTTGTTGTCCGGTCTTTGAGATGTATTGTGTCCAGAATAATC  
CAAGAAAATTGAGTAGCTGTTCTTATCATTCAACAACACAGACATTTTGTGCATTATCGTCTT  
TCTTTCATCCTCTGTCATAGTCATCATTTGTCCAGGAATCAATTTCAATTGCTCTTTTAACCAGT  
TCCATTATTGTAGATATGTATATCTTAAGTTTAAACTCCCTACTCCAAAAAATCGTGCAGCT  
GATTTTAATTCTTTTTCTTCTCAACTAGCCTCACAATCAATCCTTCTTTTAAATCAATCAACT  
CTTCATCTTTCCTATCAAGAATTTTAATTATTCTTTCACAGTTGTTTTCAGAAGAAGGTAAAC  
ATATTTCTTCTATCATTTTCAGTTAAATTATTATGTTCTATATAATAGATCAATTCCTTGATGGA  
ATTTCTGAAGGATCATATTTGTCTTTGTACATGCTTTATCTATGATTCTTGTGCGAAACATTC  
ATTTCTTGGCCCATTTCCACCATTTTCCAGTCTTAGATTCCTATAATTTGATGAATTTGAAA  
CGACATTATTTGAGAAATTTCTTTGCTTGCCATTAAGGAGAGTTCTTGTAATAAAATGTCCG  
GAGCATCATAAAGATTTGGCATTATAACCATATTTTCTCACATAATTCGTGACAACTTTCATCC  
TGAAAAGTGATCTTAAATCTTCTATTGTTTTCTTGTGACTTTATGCATCCTATTTGTTCTTTG  
TGTGATTTTCTCAGCCCTTTATCTTCATTAAGTTCGGCATATATTAATACTTTTCTTATACAA  
GACATTTTACATTAATATCAGGTTCACTATTTATACATATTTTAACTAATTCCTCCGTTTTTT  
CTGCCGAGATCATAATTGAATCCACCAAATTATCAATCAATGGCAATGTGGAAGAGTCAGAT  
CTATAATCACTCATGAGTAGGCAAGTTGATTCATAAAGAGATGCAAGACCTACTCTTGATTC  
TGTTTTAAGATATAGTAAATTTGTTATATAGTCGATAAATTTTCTTCATTATTGTTTTTCTTA  
TTGATTCTATGTCTTTTATAAGCAACAAATTGGATTGATGGTCTGCTATAGCCATTAAATAG  
TTCATCATATCTGCATTTCCAAAGAATACAATATTCTCACATGAGAATGCAGTGAATGATTG  
TGACAGGAAAAGATAAAAGACATCTATCATATCACAGTCCCTCAATTTCTATTTTAGTAATTG  
ATGATCCATCTGTGTAACATTGGGTATTGATTCTTCTGTTTTTCATTGAAATTCACAGATTTTTC  
CATTTTTCTTTCTTTGTTGTGCATTGTATGCCAGTTTAACTTTAAGATTTATCGTCTCAAGC  
AAATTTAAGACCCATAAAGAGTTCAAAGTATTGTTTGAATATTCAGTTTTCTTTTGATTCAAT  
TCCATCTTTGATGATTTTCCGATAAGATTATACTCAATTGATTGCCTCTCACTTAATTCTAAAT  
TTTCCGCGTAATGCAATGCTGAGTCTGAGAATGTGCTTGTCTTTCCATATGAAGATAATATTT  
GAAATATGTCAATTGAAGATTGTTGATTGGCACTGATCCTTGAGCAATCCTTTGAGAATTCTT  
TTAGGAAATTCCTGAGCCTATAAATGTCTATTTTCATTCTCATTGTAGACTTTTCAGGGTATA  
GATCTTCTTTAAATATCATATGTTTAAATCTTCATTGATCAATCTGAATGGTGATTTTATTTT  
TGACATAATCCATGGTTTGTGAGTATATTTCTTTGCCATTTTCATCAAATTTCCATGTCACTTTA  
TGAATGAGCTTCGATTCAAATGAAATTCAGGCTCTGGAGGTTCATGGCTTTTTCTCTTCC  
CTTGATTCCATCAATTGTATAAAAGATTCTTTTGATTTTCCAATGATGTCTAATAAGAAAGGC  
TTGTCTTTTAAAGAAATCAATAACCCATCATATTCTTTTAGATAAACACTTGAATCTTTTCA  
AATAATGTCATATCAAATCCTGCAATTTTGTACTCTAACCATTTTTCAGGAGTGATGAGCAAT  
TCTTAGTGTCTGTATCATCATAACCTGAATCAACGCTTTCATCTGAAGATATATCACCCAG

TTCGCCATAAGTGCTTTTGTGCTTAATGATTATTAATACTCCAAAATTTTATAATCTAATTTTC  
AACTCATATATTTTTATTTATTTAAAACAATTAAAATTGATCAATCAAAATCAAAATAAACA  
TAGCAATTTAAAATAAATAGAATCACATGAAAGATAAACCAATTCAAGATCTTATAACTAAA  
ATGATGATAAAGAAGACATAAAATAAAATAAAATAAAATAAAATAAAATA

>Seq13 [organism= Allium ophiovirus] RNA2 genomic sequence

CATAATTTGCATATCCTCACTTTGAGAACCGTTATCTTTTCAGATCCCGAATTAACAAAAGTGT  
TGGGATAAGACTTTTTAAGGGAACAATCCCCGGGAAAGATGCATCTGGCATTAAAATGAGA  
CCAGACCGGAAATCTACATCTTTCGCATTTGTTTTATTTAAAACCATAATAAGCATACTAGC  
ATAACAGAATACCTAATTCTGATTCAATGATATATCATCACATACATTCACGTTATATATGAC  
CCATAGGTTGGATGTAAGCATATATTCATCCTTGTAAGAATATCATTAAATAACTAATTAATATA  
ATATAAAATAATATTATTATATAACATTATATTTAATCCCTAATCCTTTCTTCAAATCTGATC  
CAGGTGGTCCGTCCCTCATTAACCTCAACTTTATCATTCAAAATTTCTTTTTCTCCATACCAGA  
TGCTGTCCTTCAACCACATCCTTGCAGGACAGCGTGTATCAAATTGCATCACAATAGTTTTAT  
CTTTTTCTATAAACAGTGTGTCACCCTCAGATGACATACTGTCTACGAGACCCACCTCTTTCA  
TTTTTGAATAAGAAAGTAGATTTGACCCTACCCTCTGATCATTGAATATCCAAGACTCTCCAA  
GATGAAAAACTTCACCATCTACTAAGTAATCAACCTCAGCTTTCTCTACTGCAAAACAATCT  
ATCCCCCAAAATGATTCATAATCTATGCACTTTTATCTTGTGAGGTGTGTAAATGTAATGA  
TCTCCCGCACCAGTGTCCAACATTGTCTTGTAATGTGATTTTATTCTGACTCTTCTCTTCTCTT  
GCTCCGTCATTGGGTTGTATTCAGGAACTTCAGTTTCTGGAAAATTATTTGAACTATCTCAA  
CCTCACTTTCTGAGGAAACATTGTCTTCAGAGCCGGAACCTCTAGAAATTTGCAAATTTCTCA  
TTTTTCTTCTCATGTCAATTTCTATTATCATTCTTCTCTTAATCATCTCACTCCGCTTGCCTTTG  
ATCTCATTGTGAATCTTATCTCCCAATCCCTTAAAGACAGATGTCGTGTTTATATCTATTGGG  
GCATCTAAAGAATCAACATAAATTAGTGTTGAAGGTCTGATGGACAGCCTCATTGGGCTATG  
TTCTTCATGGATGAAGAAGGCTATCATCATAGAAGCATATTCTCTTCCCTGAATTGGCAGCTG  
GTCGACTGACATTATCAAACCTGATTGAACTCATGTCTTTTTTTGCGACAAAGAAATTCATGG  
ATAACTCTATCAAAGCCATCTCATCAGCATCAAATGAAACAGTCTGAATTATTGGGTCAAAT  
CCAGCAGCCTCTTTCCCTGCATCAATCAGAGAGACTGTCATCTCACCATGTTTCGCTTTCCTCT  
TTACCAAACAATGGGGCATACATTATTTGAACTTTCTCAAACCTAACAAATGGTCTTTTCATCA  
TTTTTGATCACCTTTGAAAATATGGATTTCAATTTATCCAACTGGTCAGTTTAAATTCTTCT  
TATGTTCTTCATTTTCAACTTCAGTGTTATTGGGCTTACAATGGAATTTATTACTCCTCTCTG  
AACTTTTGCAAAATCAGCAGCAATACATTCAACCCCTCAGGCAATTCTCCAGATTCATCTTT  
CAATGAAATTATACGCAAGTCCTTTGAACTTTCAAATCATCCACGACAGCACTTCCACTTA  
GCCTGCCTACTCTTGTTTCATCTTTCCCTTTTGTTTACATTTGACTTGATCAAAGAAGTGGATCT  
CATTGAAGAACTGGTTCCAAGGAAAGACATTCTAGCAAATAATGAAGACTGAGTTTTGCGA  
AAAATAAA

>Seq14 [organism=Allium ophiovirus] RNA3 genomic sequence

CATAATCACTCTTTATTGCTTTATTTAAAACAAGCGCTATCATTTAAAATAGAAATACATTCC  
CAAATCATGATCCTTTTGATCTCATACGATGCCATATACATTTTGGAGGGATGCGACACTGAT  
GTCAGCAAAATCTGCTTCAGAATTCTCCATAATCCTCCAGACCCTTGACCCATCCACCTCTTC  
TCCAGAAAAATTGGAATCATTCAGGAATGAATTATTCTTTGCTGTGACCATTTTGCTATAGA

GCTCGATCCTCCCATTTTTCATTTAAACTCTCAATTATTGCCCCGTGTTATTTTGAGCAACAATG  
ATTTCACTACGGGCCTATTTGGTGCAAGAGGATGCATCTTTAACTGAGCCTGCACATTCCCAT  
TTAAACTTCTCAAGAAATCAGAAATGCTTACTGCTAACTTTATTTTTGTATTCCATTCTTGAA  
TTATTGCGATATCCTTCCCTTTCATAGTGTCATTGATCTCAATTTCTTTATTCTTCTCGCAAGT  
CCCGGCAAATACAGCATATCTGATTCCTTTATTTCCAGCTATGCTCAATTTTGCTCTCGTGGC  
GACAGGAACCGGAAACTTGTTTATGTCAATGTTTAGGAAGATTTTCGATGGAAATTTTTCGG  
TATTTGCAGAAGATAATTGTTTACCTATGACTCCAAGATTTGCAATTTCCCCCTTGATATCT  
TGTCGGAGATGAATTTTGAACCATTTTGTCAATCAGTCTGTTTGGAAAGTGATCCTTGATAT  
AGACCAATATTGCTGCTGCTTGGATTGCTCTTTTTGCTTCCTGGACATATTTCCCAACCGAGA  
GTTGAGTCAATTCAGTAACTTTAATCAAGCTAAACATTCCTTTGGCACTAGGAATTTTCCCCA  
TGGAAGCATAAAGAAGAGCGTCTAGGACTTTGGTCCCTGCTCCTATTAGATTCATTACTTCA  
GAAGTTTCTTCCTCATAAAAATATACTTTAGCTCCCCTGTCAAATATCCTTCATCTTCTACA  
GTGACAGATTCTAAGAATTTCAAAAGATGACTCTCTATAGCTTTTCGAGTCAATAGAATATGA  
ATCTCTGTTTATGCTCGATTTAAATTCAGTGATTGTTTAACTTTTTCAGCCCCCAAGCTTTGA  
TGTTCCGGAGCATCTTTTGTCAATTGGATCCACAACAACACTTGCAGATGGCTTTTCTTTTCT  
GACTCCATCAAATAAGCAGTCTCAGTCAAATAGTGAATGACTTTTGATTGAATTTTCACCCA  
TCCATTGGGCAATGAAGCAAATTTTGCTTTGTCTTGTCTATTCTGAATTGCTGTTAGTTC  
ATTTCCAAGACTTTTCGAACCTTTTGAGTATTGTCAACTCTTCATTCGATCCATTGTTGTTATTG  
TTTTCATATTTCTCAATTATTGAACTAAATCTTTGATGGAGAGGTATTGAGTAATTCCAGCC  
ATGATGAATTCTGAAGATGTGTTTTGAATGATTAAGTTTGCACAAAAG

>Seq15 [organism=Arctotis ophiovirus] RNA1 genomic sequence

CGGTCCTGTATAACAGGATATCTTGTTTCATGTGAGAAGTACCCACAATCAGGCGCAATGCCA  
TAATTTTGATATCCATGTTTTGAGGTCATTATGAAGTTGGGTTAGTTTGGTCTTCTATTCTGTG  
AGATTGTTTGTTCATCATTCTGGTCTATTGACAAATCATGATATGATTTCTGAATAAGAGTG  
AAGAGTGAAGTCGAGGTATCTAGTTACAACAAATATGTTTCATCAATTAAATAAGATGCAATA  
ATATGAAAAAACACACACTTATAAAGCGAAGTAAATTAATAATTAATAATTTGAATAAAAAAT  
TATGGACCTTTTCTTCTAGCAAGTCATTTACATTTTATAATCTTCCCAACAATCCTCTTCCAAC  
TCCTGTCTCATCTCTTGTGCTGTCATCGTAGCATTCTTTTGAACCTCTTCTGCTGTTGAACCAA  
ACAATCCTGCTACTTCCATTCTAATCTCATCATTATTTTCGTCGTTGTACGCGTTCTCTATCTC  
GTCCTTAGTATCGATGGGTAACCTACAAGTCTCCATTTCTCCTCTTTCAAAACCTGGTTGTCAC  
AACACTTGTTATTGAATCAAACAATTCATTGCCTAACCTATCATTCAAGTACTCTTCAAGAGA  
TTCAAATTCTCGCAATGCTAATATTTCCCTTTGTATCCTTTCTTCTATTTCTTCTTCTCAGATACT  
TCGTTTTGTTTTGACCATCCCTTGATAATCTAATTGTCTCGTAGCTCCTTGATTTGTTACCTTT  
GGACTTTCTCAGGTCTTGTAATTCTATTATGAGTTCCTTTATCTCTAACGGTTTGGCGATGAG  
GTCTAAAAATAATTTTTTCATGTAGCAGTATCATTCTATTCAACAATAGCTTGAAGTTCATGCA  
ATCATACCTATGTGATCTTGTTTTGTTGTGAATTAAGCTTTTCATTGACCCTTTCTCACTCCT  
GCTAATTGTAAAAATACCATTTCAATATTTCTTCCTAAATATGCCTTTTTTGCTAGTTTTGCAA  
TTTTTACAAGTCTGTCATATGAGTGATATTTGTCCCTAAATGAGGAGCCTGTTTCTATACTGG  
CGTACAGTCTTTCTAATTCTACAGTTTCATCATTAACTTGTTCTAAACTCGTTTTAACTGTTTT  
CAGTGATTGATAGGCCTCCTTTATTATGTATCTTTGTTGCATTAAATGATCTATTATTTTTTCA

ATGTCCCTTTTGTTTTTTCTCTTATTCCCCTACGAAAGAACCAGATCTTATAGTGATGTCTT  
CATGTATCTCTATTTCCGGGTTTTGATTTTTATTATTGTGGTATTCTGCATAAATTTGTCTCAG  
TATTTTCTTGATATCTTTTCTCTGTTTTTGACCATCTGAATGTGGGGTAAGAAAGCTCTAAT  
AATGATATCTCTCTGGTGTCTAGTTCTTTGATAACTCGCTTTATCTTGCCATCTACATTCTTAT  
CAATAGTGTAGAATTCCTCTAGTTCCGTGACAATCATCTCTTTTATTTTTTTACCTTTTAGGAT  
TTGCTTTTCGATTTCCCTGTTCAACAAATTTGTTTTTGTTCATCTTCAGTTAATATCTTTATCA  
AGGTCTCATCAGATATCAATTCTACTGTATGGTCATTTACGTCTACTGCAGACCTGTTGAACA  
ATGAGTCTCTTCTCATATTGTATATTTCAATTTGTTAGTTTTTCTGCAATTATTGATTCTGTA  
CTTTTTCTTTCTTTCTTTTCTATTTTCTTCATCTTTTGTTGATAATCTCTGATTATTGATCTTTT  
ATTTCTTTTTTGCTAAGCAGAGGTATATGTAACCGGGGGATTTCGATCGATGGTATCAATATTT  
CCCTGATCCTTCATCGCATAGTGTTTGTAAGAATTTAATATCGTTACTTATAATTGAATTTAG  
CCTCACCCTAATGTTTTGTTGTTGTCAAATAATTCCTCTATCATCATTTGTAGTGTTCTCACA  
TTCCCTGTGTAGTGAGATACGTCAATCAAGAACACATCATGATTCATATATTGACCATAATTT  
TCTGGCAAAGTGATGTCTGTTCTGCCTTTAATTCGATCATTCTGGAATCTGTTTATGAGG  
TTATATCCATCATTTCTTGATATCGATATATGTTTGATATTCATGTGAGTCATAGCGAAATGA  
AAATCTCCTCTTCCTGCAAAGAGATCAACTATTGTTTTGTTTTCCAAGATAGGTTTAATTTGA  
GACAAAACACCCACAGCAGATGGGTAAATGTCAGACATGGTGGGTGATGACACGTGCTGAG  
GTTTGCAATGAATCGTGCACACCATTTTCATAGCTCTTCAATGCGGCCGAAGTCATCTTTTGGC  
TTGCAAAAAAATCTTCATCCACTGGTATAGTTTCATATCTGATTGCCCCAAAGTCTTTGGTGT  
TAAATTCTTCTCCTATATAGTGCTTTATGTCATGATCGTAATATTGAACTAACATTTCTGTTTC  
AAACACTCTTTTGTGAAATCTCCTATATATTTTCATCCACTCCTTCAAACAATTCAGTCATTCT  
GTAGCCACTTGTAGGGAAGGCCATCATTATTAATTCTGAGACCTTTTGTCTCTTATATGGAA  
ATGAGCTTGATTCCGCTTCATTCTAGCCAAGTTATTTATACCGTTTTGTTTTGTGTTATCTTTC  
TTTATTAACATTTTCATACATCTGGGGTTTATTTCTTCTAACCTAAAGACTAAACAAGTTGAA  
ATTATAAAAACTTTTCATCAATGTTTTCTTATAGTTGATGGAGTAACCATAAGATTCCATTTCT  
TTTATCCAATTTCCCTGTGTGCTGGTGATCCCCTAGTAGTTCATTGTTGATTATGCTTCTCATCA  
CAGTTTTTCGTATAACTTTTCATTTCCAATTATATTCAATCCTTTGTAAAATTTATAAACTTATC  
CAAATAGTTGTCCTTGTTTATGCTCATCCTAATCTCGGGGGCTATTTTTTCTAATGTATCATCT  
GGTATCATCTCAGGCGATATAATTTCTTGATCTTCCATATATTTGTGTAACTTTTGAAAGAA  
GATATTTTCGTCTATTTTCTCTTGTTGGCATCACCGATTTATGATCAATGAATTTCCCCTTGATTT  
CTTGATCACAAGATATAAAATAAGAATAATTTTTGTACAATCTTCTTTTGATTTTATCTTTTC  
CGTGCTCAACTCATCAGGGATATCTCTAGTGGGTTCCATTATAATGATCTCCCCTTCTGGCTT  
AATTGTTTCCAGGTTGAAGCTAACATCTTTGATGTGTCTCAAACGCTTCTTTTATTGTGAG  
TGGCCTTATTTCTGAATCTTTCGCTTTTAAGTGTCCCATCATGACCTTAGCGTAAACTATAAG  
TAAGGATACATTTAGGTTATTGTCTACTCCTCCTGTTAAATCTATAAGCGTGTTTAAGCCGGT  
TATTTCTACTGATTTGATTTAATGTTGGATGTAAGATCACCTGTTTTTGGGTTGAACCTCC  
CCCAATGGCTCGATGAAAGTATCTTCTCCTTTTGGGCACACTACATTTTCAATTACGTCTTC  
AATTCTACAGTCAGAATATGTTGCTATCGTGCTTCAGTTATCCTCATCAATGATGCAATTGT  
CTTTTCAGAACTCTAGAAAATTTTCCATATCCATTATTATCCATTTACATATCTGACCAA  
CTCATATATTAATAAATAATTTATTGAAAACATTCTTCTATTTCTATATCTCTATCAAA

CTTTGTAAATTCAAATGTGTTTTGTGGGTCCGGCTAATCTAAAGTTTGCTCTGTTTTTCCT  
GTTCTTACTTTTCCGGATTTAGTGACAATGTTGATACTCCTAGCCTGTCATCGCTGATCAGA  
GATCCAATGATTGGTATTTCCCTCAATCTTGAGGAATTCTAGTTGAATTGGTTCCCAGATTCCCT  
TCATTAGTAAGTGCTTTCTTTTCTACTTTGTCTCTCTGAGTTATGAGCCAATCAAAACCATATT  
CATCTAATACTATTTCATTAATTTTATAATCTATCATATGATTAGCATTCCATGCTTTGTTCCA  
TAATTTATTCATTTTTTTCTTTCCCTAAAAAGAAGGACAATGTAGTTGAGTTGTCTATTTTTGA  
GTATATGTCGTCTAAGTATGCATATATTGAGCATTCAATAAAATTTACTAGTTATTCTGTGTGA  
GAAACAAAATTGGAATGTAGACAATATTCGTTCTTGAAAAATCTCTCATCATCTTTGTTTCC  
TAGCTCTAGTAATCCTCTCAGTTGTCTGTTTGTCACTTTTGTCAATCAAACTTTCTTAAGTTCA  
TCCTTAATAATGACTTTGTGTCTTTTCTTCCTCCATCTAATGGAAATGGTTCTTTGATATAAT  
TTTCTGCTTTTGAAGAGAGGTTGATTAGACCATAACATTTTCTTTTAAGTTTGTGGACACAA  
GGCTGGACACGTATGTAATTCGTTTGACATTCGAATTTGAAAACCTGATATCATGGAGTCT  
GGGATGCTTGTCAATCGCATAACCATAACATAGAATAAGGTAAGTACAGTAGCATAATCACCCC  
TTCTAACAACTCTTTATTGTACATATTAATAATGGTAATATGATTCTAGTAGTGATGACTCGAA  
TGATATTCTGCTTGATTTTCGTCATTTCAATCATTTCTGTTTTGTGTTCTTGGGTTGGACTGTTT  
AATTTTCCCAGACATATTCTGCATATTTCCCTCAATGCCTTGCTATTGCTCAAGAATGAGCTA  
TCTAGTGATATTTCTAATTTGTCAGCCCATCTCAGTACTTCTTCTCTATAACCGTCATCGCTC  
GGTAGTTTCTTATCAATACTTGCTTTTTGATTGAATCAGCCCTCAGAGTAGAAGAAGTAAAA  
CCGCTGTCTATAGTCATCATCCTTTCTAGGTCATCTCCCCATAAAATATCATTATTTGGACTT  
ATGGAAAGGATTCTTTTGTAAAGACATATCTATTGGCGTGCCTTGAAATAATGGTTTTTTAAAC  
ATGGAACAGCGGCCATTTGTCACCTTGAGTCTGTGATAATTTTACCAACAAACCTAATTTTAA  
AGCATAGTTTTGCACATATCTTATTATATTATTTAAGCTATCGCTATCTAGTTTCTTTTGGACG  
AAGACACCACATGAGTCATCGCTGTATGTTGTCCCAATATATTTTGTGAAGTTAATGATCTC  
ATCATGTCTTCCATCATTAAATTGTGATTGTATTCCCCAGAGTGGACCAAACCAGCCTTCTATT  
GCACCTTTCTGGTATCTTGATATCATGATATTATCTGATAAATAGTTCTTCATATAAAATGTTG  
ATATCTGAAAATAAGTATACTATCATTGTCATCCTTTGTCTTTCTAAAGATCCTGGTGCAAAA  
CCATACATATCTGAGATTTCTTCCATGATAAATAGATTGTTCTCTGGTCTTTGCGATGTGTTG  
TGACCAGAGTAGTCTAGAAAGAGAGAATACGAGTCTTCATCATCTAATAATTTTGACATTTG  
ATGCATGGTTTGTCTTCTCTCATCTTCCGTCATGGTCATCATCTGTCCTGGTATTAGTTTCATT  
GCTCTTTTAATCATCTCCATCAAAACAGATATGTATATTTTAAATTTGAAGCTTGCCACACCA  
TAAAAGCGAGCTTTTGTCTTTAATTCTTTCTCCTTCTCGACCAATCTTACAATTTTGTATTTTT  
CCATTTCCCCGATTTTCGTCTTTGTTTTTCTATCTGTTGTAATATATTCTCGTTCAAATTCCTTT  
TTCACCTTACTTATGGATAATGTATTAATCAGTTCTGGTATATCATTTTTTTGTAATATAATATA  
TTAGTTCTTTCACTGAATTACCAGAAAAGTCATATTTCATCTTTTGTGCATGCTTTATCAATGA  
CCCTTGATGCTACGTTGACTTCTTGTCTGGTTGTAACATCTGTCCAAGTTTAAACGTTTTTGTG  
GTTTCGCTTGATTCGTGATGATGTCTGAATTAAGCTGCCTCCGGCTGCCATTAAATTCAATTC  
TTGTTCTAGTGTTCCGGATGCTCCACTTATAGGCGGTACGACTCCATATTTTTTGATATAGTG  
TGTTATCACCTTCATTCTAAAGAGCCACCGGAGGTTCTCTATTGCTGATTCTTCAACTTTGTG  
ATCCTGTAGTTCTTTGGATGTATTTTTCGAGTCCTCCATTTGTGTCCACTTCAGCAAAAGTA  
TTAGTTTTCTATTCTGACATTTTGATGCAAGTCTCTGCCTTTGCGTTGGAACAAATAGAT

AATAGTTTTCTGTGATTCCATGTTGATTGCTAATGATTCTGTACAGCATCGAGCATTGGT  
AAAGAAGATGAAGTACATTTTGCATCTGCTGATATTAAGCATATTGTTTCATATGATGCAGC  
CAAGTCTGTCCTTTGTGGGTTCTTTACAGAGCTAAGCGAAATTACATAATCTATAAATGGATT  
TTCTTCTTCATCAGACTCAAATTCATTAATTCGGTTGAGATCTTTGACTATGTTTATCGTGCA  
GCTGTTTTCTATTATTGTGAGCAAATATTCTACCATAGTTTTTCATGCCCCACATACACCAGGGG  
ACCTATAGAAACAGCAGAAAAGGTATGGCTCAAAAACATATCAACCTTCAATATCTCTTCAG  
CATTTGTGGCCTTTTTCTCAACTTTATTGTTGTTTTGCTTGAACCGTCGCTATTGAGCTGGCA  
CTTAATCTTTCTTTCTTCATGCCAAAGATCCTTCGATTTGTATGTTCTTTTATTACTCATGCTT  
GAATAGGTTAATTTTATTTGTGATTAATCATCTCCATAAGATTTAGAAGCCACATTGATTCTG  
ATTGTTTCCTTTCTTAACCTCTATTTTGTCTTCTTTTTTATTGGTCTTCTTTAATCATGGTTTTT  
GCAATGTTTTCTTCTTCTGTTTTTCTCAGTTGGTCTGCAAATCTAAATAATGTTTCTAATCTAG  
TTGACGGATGAGCATATTCTGTCAAGATGTCTTGCACAGATATCATATCATCTTGTGTGCCCC  
ATTCCACAATGAGCCGTCCTTTTCGTAAATTGTCTTAGCCTTTTTAGGTCAATTCTTGCTCTCAT  
TCCAACTTTTCAGGATAGTACTTTTCATTGATCATCTTAACTAAGTTGTCTTGTCTATTTTC  
TTGAAAGGAGAGTCAATTCTTGAAAGGAGAGCAGGCTTGTCTATGTAGTTTTCTGACAGATA  
TTCTCTTTCCCATGGTTCATAGAACATCAATAGGCTTTTATAGCCCAGCTTTACGTTTTCTGG  
CTCTTGGGCTTTCTCGGCTTCCTTTGATTTTCATAAGGAGAATATAGTTTTCTCTTTCTGTTTCT  
ATCATACTCTTTGTTGTACCAAATTATTTGGGTGAGAGTTTCTATGAGATCATCAAATTCC  
TTGTTGTATTTTTTGTATCTTCTTCGCTGATTTCTAGACCATCAATTTCTAGTGAAGTATTAG  
TTTTCTCCTTTGTTCTGATGGGTGTAGAAATTCCTTCATCAAACCTCACTGCTGCTCTCGACGA  
TTTTTTCATCAGTCCATTCCATGATTTCGATGCTTTTTGAAATGTTTGTGTTGTTTTCAGAAGGTT  
TTTGTTAAAACGATCTAATGAGTGAACCTTCGTTTGTATTTCAGATGAGTTGAATTTTGTGTTG  
TTGTGTTCCCTTACCTGGTATTCTATTAATTATATTGCTTTCCCTCCATTTTTCTATATCATTGAT  
CTTGCTTGCTTTTCCCTCTTCTTCTGTTGCTGCTACTTCTCTCGCAACAAATCAAGAACTGCG  
ATTATATCATCTCTTATTACACTTGGTTTCGCTTCTGAGCTCTTTAATTGCAATGGTTATCATCA  
CTTTTTTGTCCTTCTGCATTAATAAATGATAAAGATTGCTTCCTATAATGATCAATCCTGTGC  
TTGGCTCCAACGTATCTCTTCAAACAAATTGAGATAACTATAATCACTCCATTTCACTGAAT  
TTGAGTTGATGATCATTTTATCATCTCTGATTTGCATTCCCTCAAAATGATTGTTCTCTCTTT  
AGATATTGTTCTGAATTTTTCCATTAAGATGAAGTCGTTACAGCAGGCTCGTTTTGTTTCTTC  
TTTTAAGAACCAGTTGATTCCAATTCCACCTATAGCTTTTATTATATCGCCACTTAATGTTTTA  
TCATTGAATTCAACTATCTTTGATTCCAATGTTCTCATAACATGTTCAATTGTACTTTTTGCAT  
GTTTCGGTCTTGATTTTGTGGCATTGATAGTTGTAGTTTTTGTCAATTGCGAACACGTGGTACT  
TAAAAAATGTATCGGTC

>Seq16 [organism=Arctotis ophiovirus] RNA2 genomic sequence

TTGATTACCTGATACCGTTTTAGTGTCAGGAGGCGCAATGCCATAGGTGAGCTTCTAATCC  
GGGTGGAGTGTCTTTAACTCAACTGGTTTTTATTAAAACGATTCAATATAACTCTTTAATCAG  
AGTTTAGTAGACGCATTCATTCATGTTGTTTAGGACTAATAAAGCACCATTTGATGTTTGCT  
CACATCTCCGTCACATTATTCTCTCTCTCCTCTTGCTTCTGACACGATCTTGTTACATAGCTG  
TTTGCTCCCTTTTACCCCCGCACGTTACCTCATTCCAAACATCATCTTCAACCACATCCTTC  
CAGCCTCACTTGTATCAAACATCATGATTATCTCCTCTTTCAGTTTCAAGAACAAAGTATTCC



CAGCAGTTTCCATTGAATCGACAAGGCCATCTTCCACCAGTTTGGTGTAGGATAATAAATTG  
CTTCCAATCCTCATGTCATTAAAAGCATAGAGAGATGGTAGTTTCAGCCAGTTGCCAAACAC  
AAAATAGTCTGCGGATACCTCTTCTACAGCTAACCTATCTACCCACCAAAGTGATCAACTT  
TGTTGTTTGGCCTGATCATCGGAACGTACAGATAATGATCTGCAGACCCAGTGTCAAGCATG  
GTGAGAAGATTCCCACTTTCTTTGATTTGCACATTTCTTTTTGGTTGCTTGAAGGGGCTGGGT  
GCCGTTCTTTGATCTTCGAGATATCTTGGTAAAACAGAAATACTTCTTCTGCCTTCTTCGATC  
AATTCCTTGATATCACTGGAAGAACCAGATGATGTTGATTTAGTTTCCATTTCGAAAGTTTCTT  
TTCTCTCTGTTTCATCTTCTTGCTCCTTTCCAACCTCCCTTCTTCGGAATTCCTTCTCTTTTCATC  
AATATTCCTTGTAACATTGTCTCCAATTTTCTTAAAGACTGATGATCTTGTCAAGTCCTTTGG  
TCGATTTACGGAGTCTATGTACAAGACTGTTGATGATCTCATTGAGACTTAATTGGAATTGA  
TTCTTCAAAAGTGAAGAAAGCAACATTCAGAGCTCCATATGATCTTCCTTCTATCGGCACCC  
CGTTCGCTGTTATGTTGATGACTATCTTCTCCATATCCTCCTTCCTTACAAAAAATCCATCG  
AAAGCTCTACCAATGCCATTTCTGATGCATCAAAGATAACCTCTTGAATTATTGGATCTTTCC  
CTGCGTCTTCTTTTCCCAGATCATGAAGGGATATCCTCATCTCACCATTTTCACCATCTTCCTT  
TGAGAACAGAGGAATATACATAAACTGGATTTTTTCGAACTTGATAAACGGTTTGCTTTCTTT  
GCCTCCCAATTTTTTCATGGCTGAAACAATTTGTCCATAGTCGCCATTTTCAACTTTTTGTTG  
TGTTCACTTTCTTTCAGTTTTAGAGTCAGAGGAATAACGGCGGTTTCAATCACTCCTTTATGA  
ATGTTTGCAAAGTCCATTGTGATTTCTTCAATACCTTCGGGCATTTCTGAATCTCCGTCTTTCA  
AAGAGATCACATTCAGAGCTCCTTTTTTGACAAAATTGTTTCCTACCGAGTCCGCAGATATCC  
TATTTGGCTTGATAGATTGTTCCATCGAATCTCTTAGAAGCCAGTGCATTTTTTGCTGTTTTGTA  
GCTTGCTCCTGATTTGACAGACATTGTTTCAGTGAGACTGGTCGCTATGGATTTGTGAATATT  
TGGCAAGTAGAACAAGAGGTACTGAAAAAAAGTAT

>Seq17 [organism=Arctotis ophiovirus] RNA3 genomic sequence

AAACGAAAGGTGGAATTGCCATGAAACCATGGGAAGATATGCAACTATCATCACTGGTGA  
AAATGTCTTTGTTACCACAACCATTCAAGCAACTTTGTAGATGTTTTTCAGTCCCTCAGCAGA  
TAGACCACCGAAATCAGCGTCTACGTTTCTGATGACTAGCCACTCTCTTTCATTTCCCTCACC  
AGTCCCAAAGAAATTGAGGTCTCGTTTAAAGGCCTCGTTTTTGTGAGCTATGATCTTCTCCGC  
CATCGCTTTTCTTCCGTTTTTACTTAAAGAGAAAACTATAGCACAAGTCAGTTTTAAAGTGAA  
GTTTTTGATTGTTGGTTTGACATCAGACAAAGGATGCATCACAAGCTGATTCTTGTAGCAAC  
CATCAAGAGAAGTAAGAGATTTTTTGAGTTCTTTTGATAGTTTCAGTTTTCTGTTTCCTTCCAT  
TATAGCAGCTATAGCGACCCTAGGGGTGGTTTCAGTGATTTCCACTTCTCAGCTTCTTCAAA  
TCCACTAGCGAACACAGCATATCGAATCGCTCTGTTTCCTGCTACATTTAATTTGCATCTAGA  
TGCAACCGGCACTGGAAGCAGATCAATGTTTCATCTGCAACAACACTTTCGCAGGGAATTTAG  
CGGTGCTCACATTGCTCAACTCCTTTCCAATCTTCTCCATTGTCACACTCTCACCATCATATA  
ATTTGTCCACGATAAAGTTTGGAACTTTCCTTCTCTGATGTTTTGCTTCCCGGCAGACTTCC  
TTGGATATATACAAGAACTATACCCGCTTGCAGTGCTCTCTTCCCTTCCCGAACGTTTGAAAC  
AATTCCTTCTCAGAGATCCCCTCTTCCACCCTTTCTTCAATGAACAAGCTGCTGTTTGCCAC  
TTCATGCTTCAGACTGTAAAATATCAGGGCATCTAGGATTTTAGTACCAGCAGCGATTAGCA  
TTGTTATGTCATCATCTCTGGATCCAAGATATCTCACGAAGATGTCTCCTTGTCTGTAAGCTT  
CATCTTCCAAAGTTATGGTCTTCACAAAAGCTTCTAAGACTTCCTTGAGTCTTGTTAATTCAA

GAGTGTAGCTTTGTTGCTTTATTGTCTCGGTTATCTCTTCTTTTTTAGTCAATTTCTTGTCAGATAGTTTAGTATTTGCAAACCTCTGCTTTTCCTCCTTGGGGTTCTCGTCTGGTTTGGTTCCAGAACTGCTAGCTATGGAAGAGAGTTTCTTTCCAACCATCACCACATCACCGTTGGGATTAGTGACAAAATACTTTTCCATAGCAGTACAATTGCTAGCGACATAAGAATTGTTTTCATCAAGTATCCCAAATTGTTTCAATAGATCAACTAACTCGGTTGGTGCGTTATTCTTGTCCTTGGCAAACCTTGTAAAGGCTTCATGGAGTTGAGAGACTTTGATCTTGGATTCCATTGTTTCGGTGATTTCTTGCAACGAAGCAAAATAGTAC

>Seq18 [organism=Boraginaceae associated ophiovirus] RNA2 genomic sequence

ACAGAATATGCGATCCTCATAGCAATGGATCTTGCTAATGAGTGGATGGATCGACTTATAAGCCATCCGACTATGAGCGCAATGCTCACGGAATAGGCAATTGGAAAAGATCCAAATCTCCTATTCACAGTTGTTTATTTAAAACGATTAAAAATAGTCACTTTAATCAGTGATCTTTGAGGGAAAATAGGAAATACAAAGGACGACCTTAAATATTTACATATTATGGTATGTTGTTTAGGCTCTTCTTCTCTCACAAGCCTCTCGATGAGTGCTGGACCGCCCGAAATGACAGCGGTATCATATGCATCATCCTTTAACCAAATCCTTCCTTCATTGGAACTGTCAAAAGAGAGGACAATTTTCATCTCCCTTCATGAGGAATGCACCATTCAGCAGAAGTGATGTCATCTATGATTCCATCTGCTTTC AATTTGGAGTAAGAAAGGATGTTGATGCCGAAAGCCAAGTTTGAGAAGAAGTTTACCTCAGAAAGATGGATCACAGAAGAGCCTGTCTTGAAGTTCATTGATCCTTTCTCTATCTCAAGGCAT TCTACACCTCCAAAGTTGAACTGCTCTTCATCAGCATTTATCCTGGGCCTGTAGAAATAATGCGCCCCAGAACCGGTGTCCAGTGACAGTCAGAAGATTATGGTGTAGAAAATGAGGGTAGCAAT TCCTTTTGTTCCCTGGCCTATTCATCATTGCATCAAGAGGCCCTGTCCTTTTCATTGTGGATCTC CAGATCAGAGAGATACCTTGACACTGCATCAACACTCCTCCTTCCAGCTGCAATAAATGTTT CACCAGAATCACTTGATCCTTCACTGAACTATGCCTTGAAGATTCTCGTTCAACTCTGACTC CTTTCAGCCGCTTTTTCTTCTCAACATTATTCTCTCTCGCCTTCTTCTTAATTGATTCTCTCTTC GTTTTTATTTTCATCCTGGATCACTTTGCTCACATTCCCAAGAACATTCTTCTTGTTAAGATCTT TTGGCGCCTTGCTGGGGTCAATGCATATTATGGTGCTTTTCTTCTCTCTACCCCTCAATGGTAT CGCTTCTTCATGTACAAAGAATGCCATAAACAAAGACCCATAAGCTCTTGATGAAACAGGA ACATCACTTGCACTTATGTTAACAACAATCTGATCAAGATCCTCTTTTCTCACAAAGAAATCC ATTGATAACTCAACAAGAGCCATCTCATCCATTCTAATTTCCCTGTTCTTGAATCAGACTTTTG TTCCCTGCTTTTTCTTTCCCATATCCTCAAGTGACACAGTCACTTTCATCTCGGAAACAGCC TCATCATCATCAGACATGAGAGGCAAAATATAGGAATTGAATCCTTTCGAACCTAACAAATGG TCGACTATCTCCGCCCAGCTTGTCAAAAAGATTCTTGACTGATTTCAAGTGTAGTCAACTTAAG CTCTTCTTATGAGTCTCCTTTTTCAAACCTCAGAGTTAAAGGGCAAATAGCAGACTTGATGGT GCCCTTCTGAATCTTGCCAAAATCTTCTACAATGTCCTCAACTCCTTCTGGGAGTTCATCACC GCCAGAAAGAGAAACGATGGTGGTATCACTTAATTTTGAAATTTTCATCCTTGATTTGAGTTG CTTTCATGCGAGGCAGAGCAACTTGCTTCCCCCTTCTCGCTGGATCTCCTTGAAATCATGGATG ACTGAGATGAGCTCCTGATCGACATTCTCTGCAGATAGCAATATGC

>Seq19 [organism=Boraginaceae associated ophiovirus] RNA3 genomic sequence

CTTTTGTCACACGTGTTTATTTAAAACGATAATCAGTGGAAAGCTGAAAACATAATATGCTT ACTGAGAAACATGGGACCGACCCCTGGATCATGGATTTTGATCTAGTTCAATCCATAGATCT CTCTTATTGTATCAGGAGTCAATGAGCTGAAGTCTGCATCAGGGTTCGTCATGATGGGAAAT

GTGTGAATACCATCCTTGACCACCCCTACAAAATTCTGTGCCCTTTGGAATGACAGATTTTCA  
TCAGCAACCGCCTTCTCAAGGATTTTGTGACGCTCATCCTCGTCAATGGACACTAGTATAGCT  
TTCGTCAACTTCAAAGTAAAATCCTTAATTACTGGACGATTGGGTGCTAAAGGATGCATTCT  
CAGTTGTGTCTTATAATTTCCAGCTATCATCCTGAGAATGTCAAAGATCTTGTTTGCAAGATT  
AACCTGCTTGTTAGACTCCAACATGACGGAATAAGTCATTCCATCCCATTCTCTCCTTGGCTC  
AACCTCTTTGCTTCTGGCAAACCCTGCAGAAAAGACTGCATACCTCACCGCCCTATTTCTGCTG  
AATGGATAATTTGCATCTAGTGCATATAGGTTTTGGAACCTTGTCCAAATCAATGTCTAAGA  
ACAGCTTAGCAGGAAATTTCTCAGTATCAGTACTAGAAAGGATCTCAGCTACTCCACTCAGA  
TTGGCTATATTCGACTTGAAAATCTTCTCTTTATGAATTTAGGGACAGGCTTCTTAGAATCT  
GCCTTGCTAGGAAGTGATCCTTGTATGAAGACAAGGACAAGCCCTGCTAGGAGAGCCCTCTT  
AGCATCAGTCATGTGACCAGAGATCACATTTGCAGTAAGCTTTTCGACCTTTTGAACAACAA  
AAAGGTCCTGAGCTTCTGGCTTATCGTTCAATGCAGCATATATCAGTGCATCCAGCACTTTTG  
TCCCTGCTGCAATCAGACTATCAACATCTTTCTTACCATTGTAAATATATACCTTGATGTCAC  
CAGTTCTGTAAGCATCGTCTTCCCACTTTATCTCATATAAGAACCTTTCAAGGTGGGCTCTTA  
TGTCAGCATCAGTTACCACATAAGAGCTGGAAGTGATAAATTTATCCACTTCAGAATCAGTC  
AAAGTTCTCCCAACCTCAAAAGTCCTGTGAGGTCCTTGAGATGAACCTCCATCAGAGGATGT  
TGACTTAACAACATCATCCTCTCCTTTCCCCAGCCATTCAATTCATGTTACACCCCAAGTAATC  
ATCAATTGACTGACTCATAGATGAGGGATTTGCAGCAATTTTCAATTCATTGTTTCAGTAACAT  
AACATCACAGTTCGGATTCTTAGCATCCAATTTAGAGATTGCAATGGTAAGAGTGGAAATTC  
CTTTTGTGAGGTCAGTAATTCCAAATGCCTTCAGTGTGGCTTCTATCTCTCTCCTTTTCTCAGC  
AGTGATATCTCTAGTCCTTTCAGTGACAAGTTGTTTCAAACTGCCAAAGGGATAGTGGGGA  
TGTTTGAAGTGGTAGACATCTTTGCAATTCAGTGTGAGCTTTAGAAGTCTGGTGGTTATCTCTCT  
GGAGTAAGTGAAGTAGAGGCTCTTT

>Seq20 [organism=Buxbaumia ophiiovirus] RNA3 genomic sequence

CCCTTATAGGTGGTTGCGCATTCCACACTTTGCTGTAATGGTGAATTGATCACTGTTGCAACA  
GCCCAGTCATGCATTGGTTCCATGGGATTTGGGACAATGGCTTCCAGTCATTACTGACTTGA  
AGGCAGGCTGGGGGGTACCTTTGAACGATTTCATCTTTCTCATGTGCTGGGACCATGCGGAG  
AGTTTTTAAGAACTTATCACGATCACCGGGGATGACTGTTAGGAGGATGAATTGGCAACACC  
TCAATTGGAATTTCTGTCCGACACATCTCTTTGAGGCAGTTGTTGTGATGGGTGAAGGCTCA  
TGTATGACATTCCTCCCTCCACGGCTGAGGCAAAGGCGTGTTCTACCATGGATGCTCTAGAG  
AATATGTCATCCGCATCTTTTTTGCTTGAACCCGCCGGGCACAGGCCTACATGACTCCTTGAG  
TAGTTCCTGGATAATTGGTAATACTTCAGAAATCTTGTCCCGGCCAGTCCCAAGACACACCT  
ACCCCTAACCTCATATGGTAATGATGAGAAGGGGATGCTGGCAACCACATCAATGGGAAAA  
GCAGATATACCAGTGCTGGACAGTGTGCCCGCTAGATCTTGGATGCTGTTTGTTTTAGACTCT  
AGTAGCACATCCTTGATAAATTTGTTTGTGCTCCCTGTCCCGACTGGAGCACTGCCAGTACA  
GTACCAATGCACTATCATTGACATAAATGACCTTTTTGCAGTTTTTCAGGTTGGCATTATGTC  
CACGCTGGATGGGGCCTTCGGAAGAATAGTGAGATTGAATATTTGGCTTCTTTCCTCATCTTC  
ACGCAAAGAACAGAAGAGTATAGCATCCAACACTTTGGTGCCTGACCCTATGATGGAGTTC  
AGGGTTACCTTTGATCCATAAGTGTAGAAGATCAACACTGATCTTGGCATATAATCATACAA  
ACTGCCAATTGTGGATGCGAAGAAGAGGAACATTGAAGCAATCAGACTCTGATTTATGGAG

ACTGGTTGCTCTGAGAAGACCCTGCTAATGTCTTCATCTGGGGTGTGAGATATTGCATTACAG  
GCATCCAACACTTCCCCTGCTCTAAGCCCTCTAGGGGGTTTGGATCAATCGGTGCTGCTTGT  
GGAATGGGCACAAAGGAGCTGGTGGAAGGCCCCATCAAACCTTTCCTTTGAGCTTAGATTG  
GGAATCATACCATTCCCGAAGTTTCAAGACAGCTTCATTGGGGTCAGGTTTGTGCGTTCTAT  
CTTTGGAGGACCTGGGTATTTGGGCTCCAGGATCCCTGTTGATGTCTCTACGTATGTTGTTCC  
TGCAGGCACCTGCACCGATGCTAGTGTGGTCTGCAGGACATCAGTATCTCCTGAAGCCCAAG  
CCCTGTCCTTCAGTTTCTCAAATTCATCATGATCCTTTTTCCGCTGCTCAGCTTCTGCTCTTTG  
GGCCTCTGCTTTTTCTGCTCTTGCTGAGCTTGGAGCCTCATCCGTTCTGCATAGTCCTTTCCC  
GAATCCATATCGGCTATTTCACTTGTGACTGTGGGAAATCCGCAATCAATACAACTTTTTGT  
GTTGAGACGCTCGAAAGGCAATGGCTTG

>Seq21 [organism=Caladenia ophiiovirus] RNA1 genomic sequence

GCTAACTTGTTAGCGAGTCGCAATGACTGTAGTAATAAGAGAAAACAAGAGACAAATCAAA  
CAAGAAAAAAGAAGAGAAGGCAAACCTAGCAACTGTGTCCCAGCGGACAAGAACCCTGGTT  
TTGATAAATTCATACTACTCATAATCGCCCCAATCCTCAAGTTCCAAAGCTTCGTAAAATTCT  
TCCAATCCTACTTCCTCCAACACCTTTTCATGGGTGTCCATTTCTCTATTTCTGAGTATTTCTT  
CTTCTGTGACTTCAAATGGTAAAACTTTATGATTGTTTCTGGATCTAATTCTTTTTGTTCCAG  
GAGTACATTTTCTTGCAATTTCTAGTATGCTATCACTGAGTCCTCCTAAGAAATCAAATGTATT  
GTCATTCTTGAAGAATTCACTTAACTTTTGTAGTTTTTCATTTTTTCAATTATTTCTTCATCT  
CCCAAATTGATATTTATCTTATTGTTCCATGCTTCTTCTTGCTTTTGATAACTTATACCACACC  
AATAATTTTCATCAAAGTAATCAGTGAGACACATGATCCTGTTAATTATTAGTTTATAATTA  
GAATATTGGTTTTTGTGTTTTGTCTTTATGCTTGAGCACTGTTTTTCTTTCAAGCTTTCTAG  
ATTTGCTATTTTAAATAGTCCTTTTTCTATTGATTTGTTTTATAAGAGAATACTGCATGTGAT  
GCAATTGAATAAATATTGTTTAGCGCTTTTATTTGTTTTTCTCTAATTGCTGATTTCTAGGC  
TTTCTACCATTACTTCTGTGCTTATCAATTTTGGCCTATTAGGAAATCTAGTATAAACTTCCA  
ACACTCTTTTGTGAGTTTTCTATTGTATTTATTAGAATTTATATTTTTGAGAATCTCTAAGAAG  
ATATCTTCTGGAGTTTCTGTTATTCCAGTGATTATTTCATAGCTATTTTCTATTAATCTTCTAT  
TTACTAAGATTAATGATTCAATTGGTTCTAAGATCTTTGCCTAATTCATATAAATTTTGAGCAC  
CTTCAGTACCTTTTGTGACAATCTTTTTGGTTGGCACTGTGATATATTCTTTGTATTTTCTGAA  
TAAATCTTTATCGACAAATGCACATAGATTGTCAGCGAAGTCTAGACTGTTTGTACCTTAA  
ATATCTCTGGTGTCTTAATCAGTTTTTCTTCATCTAGCATAAATTCTAGTATTTTCTCATCAGA  
AATTCCTTCTTGTTGTTGATCTTTACTTTTATTCCAATGTCACAAAATAAATCTTTTGTATTA  
CATTTACCTATTTGAGTTGTCAGTGCACCTTGATAACAATGATCTGTTATATCCTTTTTGTAAAT  
GAATCAATGTTTTTGTAGTTCCTTTTTCAAATCTATGTACAAATATATGTATCCTGGAGAA  
TTCAATTCAGGGATAAACACTATACATTCTGTATCTAATATTTCTTCTACTATTTTTTCATTAA  
AGAATTTAAACATACCATTAAAGTCTCATAAGTATTTTTTTCTTGTTGCTCTTGAGGTCTCCTAT  
CAATGAGCTTAAACAATCTTTCTTGTTTGTATATGTGATATATCTAACAAAAAGAAATCATG  
ATCAAAATATTTCAAATATTCTTCTCTCTCAAAACAATTGAAAGTAACCTTTTTTGATGTCAT  
TCCTGGTATCCTGTTAGCTAAATTGTAACCATCTCCCTTGACAATGTGGTATGATTTATTTCT  
TGTCTGACATTGCGAGATGGAAGTCACCACGACCCCCGCACAGTTCTATTACATTTTCTTTT  
CTTGTGAGTATTTTCATACCAATAATCTTTGCAATATACCTCTTGCACTAGGGTATACAGCT

GACATTGTTGGTGAAGAAATATTTCTTGGACTTACTGAAAGCTGGCATGACATCTCAAATCC  
TTTTATTGCAGAATTTATTCCCTTTTGATCGATTAGATCCATTGGATTGATGTATAATTTGTTA  
TAATCTACTATAACCATAAGTCAAGTCTGTGTTTTATCGATGTAACCTGGTTGAGTATCCAGA  
AAATATGAGCTGATTATTTGTTGGTCAAATTCTCTATTGTCTACCAAGAAGCAAACCTTCTTCT  
GCTATGTCTTCTATTTGTTTCATACTTGTATGCTAGTGTGGAAATGAATTAATAATTGTGTTT  
GTTATTCTATTATCTTTAATATAGAAATGGAATTTACCTGTTTTAATTTTATCAAAGTTTTGTG  
TTGCATTTAGTTTAGTCCTATAGTAATTTACTTGTATGTTAATTGCGTTATTGTTTTCTATGAT  
TTTATAACTGAGTGAAGTGGATAAAATGAATAATTTCAATTAGTGCTCTTTTATATGCAGAAG  
AATAACCGAGATGTGTTATTTCTTCAATCCATAAATTACCTTCTAGATCATGACTGAACAATT  
CTTCATATAACAATCCCCTAATTATTGCTCTTGCTGGTGTCTCATTATTTATGATATTCAGTGT  
TTTATAATAGGAATAAAATTCCCTATAGAAATTTTCTTTTCTATTTTCCAGATTTCAGGATC  
CAATAATCCTTTGAGTGTTCATCTGCTATCATTGTTGGGCTTAAATAAATTGATCTAACAT  
ATAATTATATAATTTCTGAACTTGATTCCATTTTTATGTCTAACTCTTTTTGTATTGAATTG  
TGATTAATGAATTTATTCTTCAATGTATCATCATAACATATATAACTGGAATAATTGTAGTAA  
AGTTGTCCTCTTTGAGTATATTTTGTGTTTTATTGCCAAGGGAAAGGTTCTCATTCCTTGGAATT  
CAAAGTCATTTAGGCTTAAATTGAATGTTACATCTTTTAAGTGGACAATCACGTCTTCTGTTA  
TTCCTAGGGGTAATAATTCATAAGGTTTAGGTTCTAATATTCCCAGCACTACTTTTATGTATA  
TCATTAAATATTGTATGTTTAAATTATTATCGGCACCCCCTGTGATTGCCAGGATTCTATCAA  
TTCCTGAAGTGTCATACTTATTAGTGATTAGGTTAGATGACATATCACCTGTCTTTGGGTTGA  
AACCTCCTGTAAGTGCCCTATGGAAATATCTACCTCCTTTTGGACATACAACATATTCTTCTA  
TATCTTCATATTTGATATCAGAGAAGGTAGACAATGTGTAATTGCAGGTTTTTATCAGTATAT  
TTTTATTTGTGTCAACTAATCCACTAGAGAATCTTTGTATCTCCATGATTATCCACTTTGTGTA  
TCTGACTAAGTCATACGCTTTAAATATTAATTTATGTTCAAACATTCTTCTATGCCTAGTTCT  
CTGTCAAATTTTGCAAAATTGTGATGTGTTTTGCTTGGTGGATTAAACACTCTTCCATTTTGTG  
TTAATTTGTTTCACCCTTATATATTGGTTGTATCAAGTTTCTGTATGGTAGGTGCCTCACCTT  
TCCCATCAATGGAACCTTCTTCTATTTCTATGAATTTTATTCTATTGTTCCATCTCCCATTCTTT  
TTGTTATTGAGTTACGTTTACGCTATTATTTTCATCATAACTGATGTTTAGCTGTTCACTTTTCTT  
AACTGTTAAATTGTAATTTGATTTCCATGCTTTGTCTATTATTCGTAATAGTTTCTTTGTCTCCT  
AATAACATCTTCATTGTCCCAGCATTATCTATTTTTGCCAATATTTTCATCTATATAACTGAAG  
ATACTTTCTTCAATATATTTGCTAGTTATTCTGGAATTAAGAATCTTTAAATATATTTACA  
ATTGTTTGTGTTGAATATTAATCTTCTTTGTCAATTTTTCTATTAATGTAATCAAGTAATCTT  
CATTTTAAACCTTGTACTTTAATACTTTGCTTATTTTCATCCTTTGTATAGTTTATTGTATCTCTT  
CTTCCTCCTACCATTGGGAATGGGTTTGTCAAATAATTAAGTGCATTCTTTGACAAAGCCACC  
AAGGAACCGATTATTTCTTTTATTTGGTATACTCAGTGCACCTTGTATATACATTAATCTCTTA  
ATATTAGATAAAGAATACCCTGATATCAACGCATCAGGCATTGGTGTCAATTGCATAGCCATA  
TGTTGTATATGGTCCATACATTATTGCAATTACTAATTCAAGAACATCTTTATTATCTATGTT  
GAACTTATAAAATCCTATTGTGTCAGATCTTTTGGCTGGAACCTCTAAATTCTTTTGTGACC  
TTTTTCTATAAGTCTTAAACTTGTTCTCATTTTCGTTGTCATAGTTGTGTGATTTAGATAAATAC  
CTGCTATCGATGTTTTCTGTAACTGGAGTATTATATCCTTCAGGCTTGAAGCTAATAGTTTT  
ATAATTCTAAAATTTCTCATGAGAGTTTGTATTGTTATTTTTCTGATCTCTGACAACTTGCCG

TATACCCTGAATCAATTAATTTTGCATTTTCTAATTGATCATTTAATATTTTGCACCATTAGG  
ACTGATGCTCATCATCTTCTTTATATTCATCTCTATAGGAAAACCTTTATAGTAATGTTCTTTT  
AACATTGAGCATCTACCATTTGTGACTTGTGTTTGGGATAATTTAACTAAAAGTCCCATGTCT  
CTTCCATATTTCTGAACATTTTGGATTATTTTCATCCAATTTATATTGATCCATATTTCTTTGTG  
TGAAAACCTCCACATGAATCGTCTGAATATGTAGTACCAATATAATCAGTTATTCCCATTTGTT  
GGAACATGTCGTCTAACATTAACGTGTGATTGGATACCCCATAACTTCCAAACCACCCTTCA  
ATTGCTCCTAATTGTCCTTTTGAATAATATGTATAGTCACTCCATGCATCTTCATGGATGACA  
TATATATTAGAGAACAAATAAGACAATGATGTGATTTTCATCATATTCACTATCTCCTTTTCTG  
TAACCATACATGTTTGCAATCTCTTCTAATATGAAGTTTGTGTTTTCAGGTCGCTGTGAAGTA  
TTATGACCTGAATAATCTAAGAAAAGTGAGTATGCATCATCAGTATTTAGTTTAGTAGCCAT  
TTTGTACATTGTATCCCTTCTTTCATCTTCTGACATAGTCATCATTTGTCCAGGTAATAATTC  
ATTGCTCTTTTTATCATTTCCATTATGCTGCTTATCCAGAGTTTGAGTTTGAATGAAGCTATTC  
CATAAAATCTTGCTGCTTGTGTTTTGTTCTTTTTCTTTTTCTGCTAGTCTCACTATCATATATTTT  
TTCATTTCTTTTAACATGGGGTCATCTCTTCTGTAAACCCTACTATCCTGTCTCCATTCTTAT  
ACATTGATTTATCTATTTGTATTGGATCTTTAAATACCTCTCCCATATTATGATTAATGTAATA  
CTGTATTTCTTTTTCTGAATTATTTTCTATATCATAGTTATCTTTTGTGCAGGCTTTGTCTATTA  
TTCTAGTCTGTAAATTAGCTTCTCCTCCTTTATCTAGGAATTTGCCTAATATTATTTTGCTATA  
AGCACTTAATTCTCTTACTATATTATTGTTGTAGTTTCCTTTAGCAGCTTTAAGTTCTAATTGC  
GAGAGTAGTTCTTCTGGAACATTGAATAGTTGTGGGACTCTACCATGGAATTTAATATATGA  
AGAGATTACTCTCATCTTGAATAAATTCCTTAGTCTTTCAATAGTTCCACTTTTTACATTATG  
ATCCCTATTAGTCCTGGTAGTATACTTGGTTAGGCCTTCTTTCGCTTTTGTATTTGCTATAATC  
AACACTTTGGCAAGACTAGAGAAACGAATACAAGTTTCTCCACTAGCTTTATAACAGATGTC  
AATTAATTCTTCTGTCTTATTTTTATCCACCTCCAATGACTCAATCAAGTTGTCTAATATTGGC  
ATTACTGCTGAGTCATTTTTCAGATCTGCTAATAGTAGGCAAGATGGTTCATATAAACTTCCT  
AGTTTAATTCTTTTCTTCTGGAAGATGAATTAAGACTTATAGTATTTTAGGAATGATCTT  
TCACTTTCATTTGATAAACAGTTGTTGATTATGTTTAGACTTAACATATTGTCTATCAAGTAC  
ATGGAATAATTTAGCATTTCTGGCCTCCCTAGATACATTGTCCCACTGTCTGAGAAATAAAA  
CGCTTGGATAGTTGATGATAAGTATATCAATAATGAGCATTCTTTTTCTTCAAAATCAACTCT  
TGTTATAGATGCGCCTATTGGATAGTATCTTGTGTTTATTCTTTTTCCCTTCATAGAATTCTATA  
TTCTTTCCCAATTTTTTGTGTTTACATATGTGCTACTGTGCATCATGATGTTTTTGTGATTG  
TCTCATTACATCTAAGCACCAGTACCACCTGTAAGCTTCTTCTCCTAAGTCATACCTGTTCT  
TGTTGACATCTTTTTTCAACATCATGTTTGCAAGGATATTCTCTTCTACGTCCTTTAATTTATG  
TCCAAAGTTCCACAATGTCTCTCCTTCTACAGATACCTTCGAGAAGTTAAATAGTTTTTTCAT  
TAATATAAATGATGCATCTTGAGTTGAGACAATTCTAGGAAATGCATTTAACTCTTCATTGA  
AGTAACATTTTCTGAATAGATACAATTCAATCCTGGCTTTTGTCTTCCACTTAGTAGGGTATA  
GATCTTCTTTCAATATAAAGCAAAGATTTTCTGGGGAAATATCTTTATAAGGAGTTTCTATTT  
TGCTTATCAAAGCAGGGGTTCTTCCTTGATCGGTAAATCTTTTGCTCTTCAAACATAACTA  
ATTGATTTCTGAATTCAATTACTACTTCCTTGCTTCTTCTTGCTTCTTCTTCAATTGACTTT  
GTTAAGTCAACAAAGGAATCTCTGAACTTTTCCAGTAATCTCATCGACCTTGGATTTTCAAAC  
TCATTCAAATTCAGCTTAGCAATAAGGGCATCCATCTTCAAGAATTTATTTAAACCCATA

TATATATCACTTTAAGGCTGAGTATAATTTAAATAGATCTTTCCTCTTTATCATTTTCATTTAAC  
ATTTCTGGACTTGGTAATATCTTACTTTGTGGTATCTTGATTGATTTGTTTTCAATAAATATA  
TATGTGATTTATCATATTGTATGACAAGATCTTCTTGTATAAAAATATGATAAATATTCAGAAA  
ACATTTTACTGAAATTACTCGTGCATATAAATTCCATGCCCATATGCTCATTGGAAAACATTA  
TTTCATTAACAGTCTCAATAATTATTATTGCCTTCTTTGTAAATGTTTATGGTCTGTCTCGCT  
TAACAACCAAGATCCTAATAGGAAGCGACAGTATTCAGGATATTGAGATTGATATTCCTGCA  
ACTTACTCAAATCAGCTGAATTGCGATGCCAGACATTGATTGGAGGGGTGATTTTGTCTCT  
ATTTTCAGGGTCTTTACAAATGACTTTGCATTGCAGCATTTAAGAGCCTTGACATTTTCTTT  
TTGCTTGTAGCATACTCATTAGATGAGGAACCCATTGCTTTTTG

>Seq22 [organism=Caladenia ophiovirus] RNA2 genomic sequence

GATCTCTTATCTCTTTCTCCGCTAAAGGAATCTTCCATGACACAAAAAATATGGTAGACAAA  
TTACAACAGATACCTATGAGCGACAGAAAGAGATAAGAATGTAAAGATTCCGCTGAGTGGG  
ACTAGTCGCTAAGCCACCCAACAATGCTGCACCTCCCCCATGGATTAAAGGGCCGCTCATG  
CTACGTGATGTTAGGGAAAAATTACGTACGCATGAGTTATCTGTGTCACACGGGGGGCATT  
ACACAGAGTACCGGGTCGCAATGACCGTAGTAATGGAAGACTATAGATCGCAATGATACGA  
TAGTCTTCATAGGTTTTTATTTAAACACAACAAACCTGCTAAATTACCCCTACTTACCAAG  
AACTCTTTCTGAAGTGTGATTAACACTTTCAAAAATCATCCTACCATGTTCAGTGTGACGTAA  
TTCAAACATTAATTTATCGTCTTTTAACAGAATTGATCTGTCAGGGCTAATTGATTGGAGACA  
GTTGATGATTCCATCTTGGACAAGCTGAGTATAGGAAATGAGTGGCAAGTCTGCTGAGGAAC  
CATACAACACATTTTTGAGATTACCCAGTGACACCCGAGCTTGAGTTCAAAAATCCCCGATT  
ATCCTGGTAAATTTGGGAGGATTGCCACACATCTTGGACCCTTCTTCGACTTTGCAAGTTTCA  
TCAGGTAAAAGGTTTGGATTATAAACCCAATGATTGGGAGCTGCGGTGTCTAAACTATCGA  
ATCTTTGAACATAATTGGCAAGTTTCTTGAAGATAATTCCCTATCTCACTAGGTGTGATGGT  
CACAAGATCATGATCAATACTTGATTTCAGATTTGTCCACACCACTTGTACCCTCGTCACAAAT  
GGCTACTTTTTCTTCAGTTTCTCCAGCTCGTAAAGATAGACAGCCCTTCTCTTCTTTTTCC  
TTTTCTTTCTTTTTCAGGTTCAGTCTACTTGTGACCTGATCACATAATGATTGCACAGAACTG  
GTAGTATTTATATCCATGGGACGATCTAATGCATCAATTTCAAGAGTTAGAGAATTTTTTCTC  
TTTAATGTGCCAGAAAAGAAATCCCGATGGATGTAAAATGCAACCATCATGAATGCATAGG  
ATCTATTTCTCACTGGCACCGACCCTGCATGATAGTCTAACTCTATGAAATGTAAGTCTTTGC  
GCCTAACAAAGTAGCTCATTGATAACTCAGACATGCTCATCTTGTTTCATGCTAACTTCAACG  
GTAGAGATGCTCCTGTCCCGCTCAGAAATTATTGATGTGTCACAGAGTGAGAATCTCATTTT  
CTCGCCTTCATTCAAGCTTTCATCGAATAAAGGAATGTATAGGATTTTACCTTGTCAATCCT  
ATAGAATGGGTATTCATTTCCGCTCATCTTCTTCAACATTGAAGAGATTTTCTGGAGATTTGT  
TAGCACTATCTTTTGTGATCCTTTTCCTTCTTTAAGCTTGAGGCTGAGTGGGGAAATAACTGA  
TTCAATCTCTCCACGAGTAACACTTGCAAACCTCAGAGACCATACTCTACATCCTCTGTCA  
GGCAGCAGTCTGAGGATAAGGATACAAGAGTATGTACACCTCCTTCCCTGAGATGCTCTGTG  
GCATTTGAAAAAGAGACCCTATGACGAGTGGACAGGGGTATCTCAGTTGACTGTGACACAG  
ATCTAGTTAGCATGCTTGCAGATTTTAGAACCATGCTTGGTTTACGTGCTAGACGCAGTCGCT  
TGTTAATAGTATC

>Seq23 [organism=Caladenia ophiovirus] RNA3 genomic sequence

AACTTATCGGTTCTCGGTACTAACAGCTTTATTTAAAGCCGTACACCAGAAGACTTGCAAAC  
AAGTTATGCCCCATAAGCGCCCCGGACAGCTCCCAGACTCAGCCCCACAAAATCCGCCTCAG  
GGTTGGTCAAAATAGGGAAAGTCAGACGGTCTTCATTGTCCTTAACTCCGTAGATGTTGATA  
TCTCTCTTAAATGCATCGATCTTATCCAGATCTATCCTTGTGCGAAGTTCAGTCCTTCCAGTTT  
CAGACAATGAGTACACTATTGCGCAAGTCAGTTGGAGAGTAAAGTTCTTAATCACAGGCTTC  
CCTGGATGTAATGGATGCATCCTTCTCTGAGCTTCCCAGTTCGATGATATAGAGCACAGGAA  
ATCCACGATTTCTAGTGCCAAGGTTATCCTGGTAGTGGCAGCAATTCTTTCTGCTAATGGAG  
GGGGACCAGCAACAGTGAGATCTGGTAAAGTCTTCCTTGTCAATCTCTTAGCCAAGAGAGCA  
TAGCGAATCGGTTCGATTCCCTGCAATAGACATCTTGCACCGAGAAGCAACATCTGTTGGTAA  
CAAATTGATATCTGAAAGGATGAACACGACAGCTGGAAATTTGTTAGTAGAGGTGCAAGAA  
AGATGAGCTGCGAATTCCTGTTTCAGTTAAGTTGGGCATTCCCATCATAGTCTCTTTCACAAAT  
TTTGAGATACCCCTGCCACTCCCTTGACTGGATGGTAAGTAACCCTGATTGTAAACAGTTGA  
GAATGCACTTTTGATTGATTTTTGGCCAATGTTGATTCTCTCAGCCACTTCTCTGTCATTACA  
GGTTTCCACGTCGATATCATTTATCCTGAAAATGAAATTGTTCTTCTCCGAAGCATGGTAGGT  
TGTGAATAAGATAGCATCCAGGATCTTTGTTCCCGCAGCCAGTAAAGATGAAATGCTCAATT  
CCAAGTCAGCAAATCGATGGATGACAACTTCCTTTGCAAATAAGAGTCAGCAGACTTTGGG  
AGAATCTTCACATAGGCTTCCAAGGTGTTCTTTATCTCATCCACATCAAGTGCAAGATTCTTC  
CCCGCAATGATACTCTCCAAATCAGCTAGAGTCAAATTTGGTGCATCATTTTCGAGGGGGTAT  
GTAGTTTGGGACTCCCGTATTCAGAGAAGGGGTGGAAGATGAGGATCCTGGCTGTTGATTCA  
CTCGTACCAGATCATTCCTATTACAAATTGCATTAGGATTTTGTGCAACCAAAGTCCTGACTC  
TAGTTGCAACTGTTTGATTATGAGCCCATTTGGCTGAATTACTCCAAATAGGCGAAGAGTA  
GAAGTGTCTTCATCTCCACGCATGTCATTGTCCATCATGGTGCACAGAGCCCTAGCTGACATT  
TCAGTCGCCATCGAGTTACTTGAAGATAGCAGTTAGCAAAACGGTTTTTAAG

>Seq24 [organism=Chrysanthemum ophiovirus\_indi] RNA1 genomic sequence

CAGAGCTCGTTTTTACAAAACGAAGAAAAAACCGGTCGCATTGCCGTGATTTTTGATCGATC  
AAATCGTTTCGATCTGTTCTTTGTTCTTAATTCACCTCTATTTGTTTATCATTCACAATATCA  
TGTTTAGTTCTTATTACTTGTTTTTTTACATTAGCTCTAAATTCTACTAATTTTCGTTTACCAA  
TTTAAAGTTTGTTGTTTGTCAACAAATATAAACTTATTATTTAACAATTATTAATTCTGTTCC  
CTAATCTGATCATCAATAGTCATCAAACCTCTTCTATATAATCTTCAGGTGATACGTTTTCTCT  
TATCAGATATTGATCCCCCATTTCTTTGTTTTCTCTCATGTTCTCTTCAGGGTTTCCGAATAAA  
GTAGCCATCACTCCTTGCATGGCTTTTGCTTCAGTGGAATCTTCTTCTAATGTCTCCGACAAA  
AATATCTGATTCTCTTCACCTTTTATACTTGAAATTAGACAAGAAAATAGTTTCATTTCCCTCT  
AGGGAATTAATAAGTCTTCTATATTGTTGAATTCCTTTATGAACTTTCTAACTCTTGAAC  
TCTTTCTCAAATTTCTTGTTATCAGTTTTGCTTCCTTGCCACTGTTTTATTTCTTTTAATTTATT  
GAACACGAATTTATTTCTATCATTGTGGTCTTCTGTCACTGTTATGTTGAATTCCTTATGTAA  
AACCCTTATCCTGTTTATTATCAACTTGATGTTTAAACAGTCATACCTTTTCTCTTTCTTTTA  
TTTTTCATCAGCTCCGATAAGGTCTTTTTCTTGATTCTGAAAGGATTAAAAGTCCCTCAGGT  
ACCTTTCTTTGTTTATACGAACTCACGGCCAAATTAGCAATGTTGAATATCCTATCAATCATT  
TTGTATTCAATTCCTCGTTTGGCTAGATTTTCGTTATATTTTTCAATATCTCGTTTGATGAATAAA  
GCTTATCATTCTTTAACAACCTCCGATGATTCTCGTATTATCCTCCAAGAAGCATATGCAGTTT



GATCTATGTATCGTGAGTTCTCCATCAAGCTCGATAATTGCAGCACTTCTTCTTTGTTTCAGCT  
CTTTGAAGCCTAATATATATAAACCCTAAGATATTTGAAATCTTTATCAACTTGAATTGTCT  
GAATATCTTCTGTAGTGAGGTTATTGTCTCTCATGAATTTTCTTATGTCATTACCCCTTTTTAA  
GGAAGAGTTTCCTGTTTTCTCAATATATGGCCTCCATTTTATTAACCTACTCCTAATAGAATC  
GATAAATGTATTTTCTACTAATATATCCTTCATAAATGTTGATTTGCTTATATTATACTCTACC  
ATCAATTCAAAATCTATATTCTTCCTTTTCTTCAATTTTGACTCTAGTTTAGGAGGGATATACT  
TGAAAGATGAATCCGATTCTAAAAGCATCTCCACTAAGGTATCATCACTAATAGATTCCTCA  
GTATGATCAGAACTCTAATCGGGTTTTCTGAAAATAATGATTCATTCTTTATCTTCATCATC  
TCAACCATCATTTTTTCCGCTAAAATGGATTCACTAAATGATTTCTTCTCTCTTTTGTTTTTGA  
ATGCATCATCATATATATCACCGTTTATCATCAGATAGACATAACCTGGTGATTGTACAGAA  
GGTATCAGGATACGCATTTCTCGCCTATGTAGGATGTTTTCCCAATCGTCTATCCCTATTTTA  
ATTAGACTATTTAATCTTATGATTATTTTCTTTTTCTGTGTCACAAGGTCAAATAACATCTCA  
ACGAGTTTTTCTTCTTGCTGTGAAATGAGAAATATCCAAAAGAAACACCTTATGATCAAG  
ATATTCTGAATAATTCACTTTGTGAGTCATGTCTATATTCTGTTTCACCTCTGTATCCCTTTT  
AGTCTATTTATCAAATTGTATCCATCGTTTCGTGATACAGATCTATGTTGTATATTCATAGCG  
TTCATGGCAAAGTGATAATCCCCTCTCCAGCAAAAAGATCTGCTATTGATTCCCCTTCCTTA  
ATGAATCCATTGTTTTTAGCAAAAGATAGCATTGATATAGCCGATGGAAATACATCAGATTT  
GGTCGGAGAAGAAACACTCGCAGGCTTACAGTTCATTGCGCATATCATCTCAAACCCCTTTA  
ATGCTGAAGAAAACATTTTATGACTATTCAAGTCTTCTGCTGATATGCCAACTCTGTGTATT  
CTATGAAGTTTCGTTCCAATTTAAATCTTGATTTCGTCAATATAATTTTTAACGTCGCTTTCGTA  
ATAACGATTTATTTGAGATATGCTCAATTTTTTTCCATTATTATCTGCATATATATTATCACT  
GCTTCAGCAAGTTCTGTGAACTCATAACCTGATGTGGGAAAGCCATTAATAGGAGATTGCT  
TATTCTCTTATCCTTAGTGTGAAAATGAGCATCAGATGATTTGAACCTCCTAAGATTGATTAT  
GGCATTCTGTCTTGTCTATCTTTCATTATTGTTAATGTGTATTGCCCAACTTTATTCTCTTCT  
AATCTGTATACTAATGATGTAGTCACTATGAAGATCTTTAAGAGAACCATTCTGTATTCTAAT  
GAATAACCTCTTCTTGTTAATTCGTAAGCCCAAGTGTTTGCTCCTCCTTCCATTTACAGATCTA  
AATAACTCTTGATACAATATTGATCTGACGACCGATCTAGTCGGAGTCTCATTCTCTATTATA  
TTTAATCCTTTATAATATTCATAGAATTCTGAGAAATATTGTTCTCTAGTCGCATAATCATTC  
ACTTCTGGGGCTATTTTCTTTAACGTCTCAGATGGAATTATATCTGGGCATATTATCTCTTGA  
TCTTCCATGTATCTGTGAAGTGAGTGGAATGAACTCATTCTGTTTATTACTTCGGTAGGCACC  
ACAGACTTATGATCAATGAATTTTCCTTTGATGTCCTCATCTGTTGATACGTAATATGAAAAA  
CTCTTGTAACAGTTTTGATTTCTTTAAGATGGAGGACAAATCTCCTTCCTTGATGCAAACCTTC  
TCTGGAAGGCATTTTATACTGGAAGATGGTTTCAAGTTCTCTATCTGAAATGTAACGTCTCTT  
GAAAATCTTAACACATCTTCTTGCAAGTTCAGCCCTTTTATCTCATTTTGTTACAGTCCAATC  
CCTGCTAACGTGCACTTTATCACCGTAATAATCAATGCAACATTCATATTATTATCCACACCT  
CCATACCTTTCTACAACCTTTGTTCACTCCCGTTGCTTCGTATTTGCTTGTTCAAGATTTGATG  
TAAGATCTCCAGTTTTAGGATTGAATCCTGCAGAACTGCTCTGTGAAAATATCTTCCTCCTT  
TTGGAGCTACTACGTGTTCTTCAATATCTCTATATTTAGTATCAGAGAATGTGCTTAGAGTGA  
GATCAGCAATTCTTTCCAAAGTGCTCTTAGACTCTTCTGAAATCTTGCCAAACTTTTCACAAT  
CCATTATAATCCATTTTATGTACCTAACAAGATCGTAGGCCATGAAAATCAATTTATTTTGA

ACATTCCCTCAATCTCTAAATCCCTGTCGAACTTGGTCGTATTCACATTAGTTCTTGTTGGAC  
CGCACCTCCTCATATGCTCCTGATTTTTTCCAGAGTAGACGAATCCTGATCGTTTCACTGGCA  
TGATAAGATTGAAGTTCCTATCATGAGATAATTTCCCTAATATCGGTAATTCTTCTATCTTTA  
TGAAATCTAGCTTGATCTCGATCTTTTTACCCCTTAGTGTATAGTGTTTTTCAGTAAGATCCCT  
CCTTTC AATTAACGAACCAAAACCATATTGTTCTTTC AATCCAGTTATCGCATTCTGAAATTT  
ATATTCAGGTTTGTGATTTGCTTTCCATGCTTTGTTCCACATTTTGTTTAATTTCTTCTTCCCCA  
AGAGGAAGGAAAGTGTGGTCGAGTTGTCTATTTTTGAGAAAATCTCTGATATATATTGAAAC  
ACAGAACTACTCATAAACTTTGATACAATTCTGGATGAAAACGAGTATTTGAACGTGTCAAG  
CAATTCTACTTTGTATTGTTCTTCATTCTCTTCATTCCAGCCAACAGTATTTCTCTCAATTCT  
CTATTTTCTATCTTGTTTATCAGTTCTTTTTTTAAGAAGTCTTTCAATAACGTCTTTGTATCAA  
ATTTTCCTCCTGTCATAGGAAAAGATTCTTGATATATAGCTTCTGCCCTGTCGCTGAACTTGA  
CCAAGTCATATAGTTGTTTTTTCATTTTATCTGTGGTTATTAACTCTCGACATAGCATATTCT  
TTTGATGTTAGATATAGAATAACCAGAAATCATTGCGTCTACATATGATGTGCATGAACATC  
CATACATAGCATACGGTAGATACATCATCATTATCGCGGACATTAGTTGTTTCGTTGTTAT  
TGTTGAATCTGAAAAAACCAATACTATGTCATCTTCTGTTGGCAGTTGGCTCACATCGATTG  
TTTCTGCAATTTCGAACTTTTTCAGACATATTTTAGCATATGAAATATAAGCATTCTGTTTG  
ATAAAATCTACCGTCGAGTTCCACATCTAGGAAATGACTAAATCTGATTATCTCTTTATGTA  
TTACTTTTAATACTCTGAAATTTCTCAATATCGTTTGTATCTTGTTGTTTCGTTAGATCTCAAGAC  
CGATGATGTGTATCCACTATCGATTATTGTCAATTGTTCCATTTTCATCCCCCACAGTGTGCG  
TGCATTAGGTGTTATTGCCATCATCCTTTTAAAGTTGTTTTCAACTGGTGTGTCTCTGTAATA  
ATGACACTTTAACATAGAGCACCTTCCATTTGTCACCTGAGTTTGCGACAATTTCAACAAGAA  
GTCCCATTTTAAATGCGTATTGTTGTATGAACTCAATGATTTTCATCCAACCTTTTCCTCAGTTAA  
ATCTCTTTCTATGAAGACACCACATGAGTCATCTGAATATGTTGTTCTATGTATTTTGAAAA  
ATTTAATGCTGACAACATATCTTCCATCATCAATTGAGATTGTATACCCCATAAATGGACCGA  
ACCAACCTTCTATGGCTCCTTTTTGATGTTTTGAGACTACGACAAAATCAGAAAATATATTTT  
CAAACAATATTTCAATGTCTGAAAACAAATAAACCAAATTCGTTAATTGTGATCTTTCTAAG  
GATCCATCCTCGAATCCATACATATCTGCTATTTCTTCCAAGATGAACAAATTGTTTTCTGGT  
CGTTGTGACGTATTATGGCCAGAATAATCTAAAAAGATCGAATAGGAATCTTTTTCATCCAA  
GATGCAGGACATTTTATGCATAGTGATCCTCCTTTCATCTTCTGTCATAGTCATCATTTGTCCT  
GGAATAAGTTTCATTGCTCTTTTAAACCATTTCATAATTATTGATATGTAGATTTTGAGTTTG  
AAACTTGCCACGCCATAAAATCTTGCTTCGGTTTTCAACTCTTTTTCTTTTTCTACTAGTCTAA  
CTATCTTAGACTTTTTGAGGGATTTTAAAGTAATATCTTTTCTCGTTGTCAAACGAACATCTC  
GTTCTTCTCTCGTTAAATCATCAATTTTCACATCAGCTACCAGTTCACTTAGGTTGTTTTGCGT  
GATGTAATATATCAGTTCTTTTACAGAATTTCTGAGAAATCATATTCATCTTTCGTGCATGC  
CTTGCTCTATTACTCTGGAATTTATGTTGACCTCGTTTCCTACTTCCAACATTGCTCCTAATCTT  
AAAAATCTGTATTGGACTGGATCATTTATTATGTGAGTGTTGTAATTTCCACCAGCTGCCATC  
AACGTGAGCTCTTGTTCCAGGATAGCAGGTGCATTCATCAGTTTTGGCACTGATCCAACTT  
CTTTATGTAATTTGTCACAACTTTCATTCTCATCAATTGTTTTAATCTTAACACAGATTCTGCT  
TTCATTTCATGATTCCTGTTTCGTTGTTGAACATATTTATCTAATCCTTTTGTTTCTGAGACTT  
CTGCATACACTAATACTTTTCCAAGACAAGACATCTTGATACATGTCTCAGCATCAGAAATA

TCGCATATGTCAAACAATCTCATAGTTAAAGATGCATCCTCATTTATTGAATCAACGATGTTG  
TCTATTATCGGTAGTATCGCGGAGCTTGATTTCAAGTCCGACAACAATAAACATGTTGCTTC  
GAAGAGTGCTGCCATGTTCACTCTTTTTCGGATTGTTCTCTTTGACAAGGTCTTTGACGAATGT  
GATAAACAATGCTTCTAGGTCTCTTTTTGCTGAATCATTTAATGCTTTTATGAGATTTAATGT  
CAATGAATGGTCACACAATGTCATCAGGTAATTGGTCATGTTTCCATCACCAATGATCAACA  
AATTGTTTTTTTTCGTCTTCAATTGCAGTTATCGTTTTAGAGAGAAAAATATTAATAATTCTCT  
CTTTCGGTGTTGATGGAAATATAGTTACTTTTTGTAAAGCTTGTTCCATCTGAGTTGACCTTTG  
TTTCTATTCTTCTTTGTTCTGTTCTAGAGATAATTGAGAGTAATTCTTCTCTGAAGACATCAC  
AGAATAGTTTATCTTTATCTTGTGATTGATTGTCTCCAACAAATTAACCAACCACATGAGGGT  
CTTTGTTTCAGAGTCAAGTCCATGTGCAAATCCTTCCTCTTCATAATCTTCTTTTTTGTTAAGG  
AAGTTTTCTGAATTGCGGTTTGTCTCAAACCTCCAATAGTTTGATCCCAAGATCAAATAAAAAG  
GTCTGATCTTTCAGACTCTATCTTCATGTTTGACATATCATTAAATAGATTTACAACAGCATC  
TTGCGAAGAGACAGGTTCTATTTTTCTTCCTTCATTGCTTATCTTCTTCACAAATTCTCTAAAT  
CTTAACACATCGATCCTAGTTCTTGTGCCAAACTTCTCTGGGTACTTGTCACTTTTCATGAAA  
AATTCAACAACATTTTCTGATAATGATCTATATGGTGAGTCAATTTTATTAATCAACACTGGC  
TTGTCTATATAAGTATATGATATATATTCTCTGTCCCAGTGCTCAGTGTACAAAAACATCTGT  
TCATAATCTATTTTGCCTTTTTCCGGTTCCATCTTTTTTTCTTTTTTTGAATTTGTTTAGTTTT  
ATAAATTGCTCTTTGTATTTGTACATCAATGATGAGAGTTTCTGATTTTTTTCTATTTTTTTCA  
TCATTTTCATCGTGTTCCTTCAGGATTTCTTCTTCTCTAGCAAATCGTTTAGATCTCCTTCGCA  
TTCTTCAGACTCAGCGATAGTGAAAATACTCATTCTCTTCTCATTGTTAGGATTCACATATGT  
TTCTGGTGTGTTCTCGTGTGATGATTCTACACTGGAATAAATAGTCTCTAGATCTGATTTATC  
ACTTGACCACTCCATCTCAAAGATTTGTTTTTCAATAATGCTTATAATTACTCTCTTTCTTTTT  
ATTTAAAGCGAGGATTTCAAGCAAAACATTCTTAATCGTCTTATCTGTTATTAGATTAAAACA  
ATTTGTGTCTCTTGCTCAAATAGTTTCGTGATCTGTGATCGTTTGCAGTGTTGCTTATCGATCTC  
ATCATAAACACAGTTTTTGCAACCCATTGCTTAGTCCTGCTGCACTTTTCTTCTATGGCTTTGT  
TCTTTGAGAACATTTCTTCCATCCTATCAACTCTTTTCATTTCTGTCTTACTTTTCAATAGCCA  
AAGATTGTTTAATTTCTTCCATTTTTTACAAAGGAATTCTTTTTCTGATGTCGAAAGCATGGG  
ATAAATGTCATTCTCTTGTGGCACCTCAGTGACAAATACATCAAATCCTTCCCCATCATAGA  
ATATCATATCGGATAACAGATTCACAAATTCTGTTGATTGAAATAAGTTTGCTTTATATTTCA  
CCAATTGTAAATCAATTCCATCTTTGATCAATGCAGTTTCAAAGTTAACATTCTTGTGCAATT  
TTATTGTTTCCTTTATCATTGCCATGAATTGCTCCTCATTTTTTGATTCTCTTATCATCCAGCA  
ACCATGTAACCTTACGCCACTTTTCATCAAACGAATTTTCTTCTATTTTGAGAAATTTTCTGTA  
AATTCATCTAAGTCTTCTCTTACCTTAAATCCCATCTTGTTTCATCTCCTCTTTTGATACTCTC  
ATTTTCGTAAAATTGAGCTTCTCCAGTTGATTCCAATAGATCAAATTTTCATTTTTGTTTTATGA  
AATCTCAATTATTGGAACCTGTAAG

>Seq25 [organism=Chrysanthemum ophiovirus\_indi] RNA2 genomic sequence

CGATCCTGTATATGACAGGGTTTCCTCATTAAGAGATTAAAGATCGCATTGATCCGATTTTGT  
GTTGTTTAAACATTATCTTAAGTATCACCGCTTCCGTTCAACAATTGCTTTTCCCTTTGCTTCA  
TGCTTCGGTTCGAACCTCTGCTTCTAGTAGCATTGGCCTTCCACAATCCGCGTCGTCGGTACT  
AATCCCTCATGTCTACCAAAGCGGGTACTGGAATAAAATCTACAGGTGACTTTTTTGAATT

GACATCGCTTTTCTTGATTCCAATTACCCTGATCCTATTTTTCCTCTTAGTTGCTTGAACAAAG  
CCACCTGTTGATTTTATTCAAGAGTTTATTAAAAACGATAACTACTAATTAGGAGCAATACA  
AAGAAGATGTTTTATAAAATCTTCTTTCCTGATTTTCGTTCTTTGATTCAGTACTGATCAAAGA  
ATGTCAATCGTTTTAATTAAAATACAACACACAATATTTAATATTACACACTGGCACAAAAC  
ACTAATGAGCATCGACTTATGGAACAATTGAAACATTACATTATACAAAGCCATTGATTTCA  
ATCATGGTCTTTAATGTTTGTATCACTTATATTAGCTTCACTCTAGACCGCATATCATAGT  
TGAAATGATACGCATCATGGCCTTCTATTTAAATTTTCATTGTCATCATTTTCAGAGTATGCATT  
AGCAGACATTCTCTTATTGTCAGTGACTTCCTTCCATACACTGTCCTTCAACCACATCCTCCC  
TTCCTCACTTGTATCGAATACCATCACTATTTACCCCTTTAGCTTTAGAAACAAAGAATTTCC  
TGCTGTTGTCATCTCATCAACATGTCCGTCGTTCCCTTAACATTGAGTAAGACAGAATGTTTAA  
TCCCAACCTTCTGTCAGTGAGCATGTATACTTCCCTTAAAGACCATATCTTTGGTCATGGTCCT  
AAGCAAACATTCACTTTCTCAACTTCAATCTCCTCAACTCCCCGATATGCTTGATCACGTC  
AGTTTTATCGATCCTCTCACAGTGTATGAAATGATCTGCTGAACCAGTATCAAGAGTAGTCA  
AATAATCTTCCCCATTTGGTAACATGTACCTGTGTGGTGCAAGAGGTTTCGATGATAGGGGGA  
GGAGGTGCATCCCTTTGGCTAGCAAGATAATTAGGCAACACACTTATGCTTTTCCTGGCAGC  
ATCCATAAAATCCCTAGCTCCTTCAGAGCTGCTTGAGCTTTTACTTTCAACGTCGAAGTCTAA  
GTATTTTTTGTCTTCTTTTTCTTTTTTCATTTTCTCTAAGTTTCTTCTTATAAGCTTCCTTTTT  
TGTTTCAAGCTCTTTTGTCACTTTATTGGCCAATGAATTAAGACAGATTTATTATTGATGTC  
TTTGGGCCTTGAAAAGGAATCAATGTAGATGACTGTTGAAGGCTTTTGGTCAATCTTTGTTG  
GGATTGTCTCACTGTGAGCATAAAATGCCACGTTTAGAGATCCATACTTCCCTTCCAGAAATA  
GGAACACCTTCTGTCTCAATATGAACAGTGATTTTTTCCACATCTTTTTCATAAACAAAGAAG  
TCCATTGATAACTCCACCATGGCCATCTCAGATGCATTGATTGTCATTGTTGTATGACCTCA  
TCATCTGTTGCTGCTGTATCATGCAGTCCTAGTGTTATTGTCCCATTGTCCTCTTCTGTCTCTC  
TCTGACTAAATAGTGGAACATAAAAGAACTGGACTTTATCAAACCTAATGAACCTTTTCATTC  
GATATGACTCCTTTTGTCAATTGAAGTCCAAATCTGTTTCATGGTTGTCATCCTAACCCTCTTTG  
TGTGTTCACTTTTTGTGATGAGTGCACCATGGGAATTATCCAGTTTTGATTGTTTCCTTTAG  
ATATGTTCAAAAATCTGATGTTATATCTTCGATTCCATCAGGTATTCCTCCCTCTTGATCTC  
GCAGAGAGATGACATTAACCTCACCCCTTCTTCACTATCTTATCTGCCACAGAACTGCCTTCA  
TCCTGCTTGTGCTGCTTCCCTGAGTCCCTTACAGATCTTGTTGATTCAATTCTCCTTGGACCTCC  
ATAGGAATATTTGAAACTGAAGACATCTTAATCTAGATTTGTCGTATTACGTCAATGCAA  
AC

>Seq26 [organism=Chrysanthemum ophiovirus\_indi] RNA3 genomic sequence

GCAGTATTTTCAAATTGATTTATTTAAAACGATGAAGGTGCACACCTGTGACCCTGTCAAGT  
TGCGAACCAACAGCAACTCATCAGTGTGATAACATCATCGTTATCATTACAATGACACTATA  
TGAAATTATATTATTCAAACCTTAATTCATCTTATATGCTGCCTTCAAACCTCTCTGCTGTG  
ATGTCAGAGAAGTCAGCATCAGGGTTGGATAAGATAGGCCATGTGTGTGAATACCCGTCTTT  
AATTCCGAAGAAATTCACATCCTTTTGAATGCGGGATTGTTATCAGCCACTATCTTTTGAGC  
CATGGCTATCAATCCACTTGCACTCAGCGAGAAGATTATCGCATGAGTCAGCTTCAAAGTGA  
AGTTCTTGATGGTGGGCCTTTCAGATGAGAGTGGATGCATGACAAGCTGGGAAGTGACATTT  
GTTGCGACTTGTTTCAAACAGTTCCTATGTCTTTTGACAGCTTCAGTTTAGCATTGAACCTC

ATGATGTCCTCTATCTGAGTCACAGGAGTTCCTTCAGTGATTTTCAAATCTGACTTTGTGCTG  
AAAGGACTGGCATATTTGGCATACTCACTGCCCTGTTTCCAGCGATATTCAGTTTGCATCTT  
GACGAAACAGCTGGAGGAAGGATATCAAGCTGTATCTGCAAAAACACCTTAGCAGGAAATT  
TCTTTGTGTTTGCACAAGATAACTGTTCTCCTATACTCAGCATGGTTCACGCTCTCCCCAGAAT  
AGATTTCTTTTCGTGATGAACTGAGGAACAGGGGTTTCAGCAGAATTCTTTCCCTTTATTCTCCG  
GCAAACCTCCCTGTATGTACACAAGCACGGCAGCTGCCTGAATAGCTCTTTTCGCATTGCTC  
ATATTCAGTCAATTGTCCTCTCAGATATTCCTGATGTTTCAACCAGTTTAAACATTCCCTGTG  
TTGTCTGGTGATTGTGCCATTGCGCAGTACAAGATAGCATCGAGTACTTTTGTTCCTGCAGCA  
ATGAGCATGTTGACATCAGCACCTCTTTCTCCAATATATTTGATGACAACTTCTCCAGAAACA  
TATCCCTCATCTCCAAGAGTGACACTTTTAAGGAAGTTTTCAGATGTTCTTTGATTTTGGAG  
CTATCAATCGAGTAGGACTCAGACTTGATTTTTGCCAAGATGGTCGCTTTATCCTTAAGTAGT  
GTATCGGACAAATCTTCGAACCGATTTTCATTATTCTTTTCATTATCATTCTTCTTGTGTTTT  
GATCACCTTGTTGATCCTTATGTTGATCTTCATTCTTGTATCAGCTACAGGTACAATCTTATC  
ACCTTCAAGCATGACCAATTTGTCAGGGTTCATTGACTCCTTTGCAATCGTCACTACATTGTT  
TGTGACAAGTGATCCATTATCATGAAGCAATTTCCATAGTTTCAATGTGTTCAATTTGTTCTCC  
AGTCAATTTGTCATTTCCCAAAGTTTGTGTAATCTCAATGAGAGTCTGTAGGGATTTTGCTAA  
GATGAATGTCGACATTATTTAGTGTACAATTGAGAAGCTAAAAAATCTGGAATAAGCAAGTT  
TTTT

>Seq27 [organism=Chrysanthemum ophiovirus\_mori] RNA1 genomic sequence

GTCGCATTGCCGTGATTTTTTGTATCAGTCGAGTTGCCTGATCTGTTCTTTTTGTTTCCGATGAA  
AATAATTTTAACATTAAATTTGCATGATAATTTCGAACCATTGTTTATAGATATATATATGTC  
TTCATCTTCAAATTTTCTAGACTTATTCTTTGTGGTTACTCCCTACTTATGATGACTTAAGATT  
GTAAATATGTAAAGGGATGTTATGTCATATTCTTACAAAAACAAAATAATTATTTCAGTATT  
CATCAAACCTCTTCTATATAATCTTCAGGGGAAACATTTTCTTCAATCAAGTATTGTTCTCCCA  
TTTCTTTGTTTCTTCTTATATTTTCTTCAGGATCTCCAAACAATGTAGCCATCACCCCTTGCAT  
GGCTTTTGCTTCATCAGAATTTTCTCTAATGTTTCCGATAGGAAAACCTTGTTCTCTTCACTT  
TTTATGCTAGAAATCAAGCATGAGAATAATTCATTGCCTTCTAGAGAATCAAAATAATCTTC  
AATATTATTGAACTCTTTGATGAACTTTCCAATTCCTGAACTTCTTTTTCGAACTTTTTGTTA  
TCTGTCTTGTACCTTGCCATTGTTTTATTTCTTTGAGTTTATTGAAGACAAACCTGTTCTTGT  
CATTGTGGTCCTCTGTCACAGTAATGTTGAACTCTTTATGTAATACTCTTATTCTATTTATTAT  
TAACTTGTAGTTTAAAGCAATCGTATCTTTTTTCTTTTCTTTGTTTTTCATTAATTCTGATAAT  
GTCTTTTTCTTGATACCTGAAAGTATCAACAGTCCTTCAGGGACCTTCCTTTGTTTGTATGAA  
CTTACAGCCAAATTAGCTATGTTAAATATCCTATCTATCATCTTGTACTCATTCGGGGTTGA  
CTGGACTTCGTTATGTTTTTCAATATCTCATTGGATGAGTACAGTTTGTCTTCCCTCAACAATT  
CTGATGATTCACGTATGATCCTCCAAGAAGCGTATGCAGTCTGATCAATATATCTAGAATTC  
TCCATCAGGCTGGATAAGTGCATCACCTCTTCCTTGTTCAATTCTTTAAAACCGAGTATGTAA  
ACGCCACTTAGGTACTTGAAATCCCTGTCTACCTGTATTGCCTGGATATCATCAGTTGTTAGA  
TTATTGTCTCTCATGAATTTCCCTTATATCATTAACCTCTCTCAAATTTGAACTTCCTGTCTTCT  
CGATGTAAGGTCTCCATTTAATCAATTTGCTTCTGATAGATTCAATAAATGTGTTTTCAACTA  
GTAAGTCCTTCATATAAGTTGATTTGCTTACATTGTATTCCACCATTAATTCGAAATCTATGT

TTTTTCGTTTTTTGAGTTTTGATTCCAGCTTGGGAGGGATATATTTGAAAGATGAGTCTGATT  
CCAGGAGCATTTCTACTAGGGTATCATCTAATCGACTCTTCAGTGTGATCTGATACTCTCA  
AAGGATTCTCAGAAAATAATGATTCATTTCTTATTCTCATCATTTCTGTGCATCATCTTTTCCGC  
TAATATTGATTCACTAAATGATTTTTTCTCTCTTCTGTTCTTGAACGCTTCATCATATATATCT  
CCATTTATCATTAAGTATACATAACCAGGTGATTGAACTGAAGGTATTAATAATCCGCATCTC  
ACGCCTGTGCAATATATTTTCCCAATCATCTATTCCCTATTTTGATTAAACTATTTAACCTGATT  
ATTATTTTCTTTTTTTGTGTTACAAGGTCAAACAACATCTCTACTAGTTTTTCTTTTTTCCCTGT  
AAAGTGAGATATGTCTAAGAGAAATATTTTACTATCCAAATACTCTGAATAATTACTTTTATC  
AGTCATGTCTATATTTTGTTCACCTTCTGTGCATCCCTTTCAATCTGTTTATTAAATTATAACCG  
TCGTTTCTGGAAACAGACCTGTGTTCAATATTCATTGCATTCATAGCAAAATGATAGTCTCCG  
CGCCCTGCAAAGAGATCTGCCACTGAGTCTCCTTCCCTTATGAAACCGTTGTTTTTTGCAAAT  
GATAACATAGAAAATTGCTGAAGGGAACACATCAGATTTTGTGCGAGAAGAAACATTTGCGG  
GCTTACAGTTCATGGCGCAAATCATTTTGAATCCTTTCAATGCTGAACTGAACATCTTGTGGC  
TATTTAGATCTTCTGCGGAAATCCCAAATTCCGTATATTCAATGAAGTTATGTTCTAATTTGA  
ATCTTGATTCATCGATATAATTTTTTACATCACTTTTATAATATCTGTTAATTTGTGATATGCT  
TAGTTTCTTTCCATTGTTATCCTTATATATGATATTGACTGCTTCAGCAAGTTCTGCGAATTCA  
TAACCTGATGTGCGGAATGCCATTAACAAAAGATTACTTATCCTCTTATCTTTTGTGTGGAAG  
TGTGCATCAGATGATTTGAATCTTCTCAAGTTGATTATTGCGTTTTGCCTTGTTCGATCTTTCA  
TAATTATCAGAGTGATTGACCTATCTTGTTTTCTTCGAGTCTATACACTAATGAAGTTGTGA  
CAATAAAAATCTTCAACAAAACCATTTCTATATTCTAAGGAGTAACCTCTTCGTGTCAGCTCA  
TAGGCCCATGTATTGGCTCCCCCTTCCATTTTCAAGATCTGAATAGTTCTTGGTATAGTATTGAC  
CTCACAACGGATCTGGTTGGTGTTCGTTCTCGATTATATTTAATCCTTTATAATATTCATAG  
AACTCTGAAAAATATTGCTCTCTCGTTGCATAATCATTTATCTCTGGTGCTATTTTCTTCAGC  
GTTTCTAACGGTATTATGTCAGGACATATTATTTCTTGGTCTTCCATGTATCTGTGTAACGAA  
TGAAATGAACTCATTCTGTTAATCACATCAGTGGGCACCACTGATTTATGATCAATAAATTC  
CCTTTAATATCTTCATCTGTAGACACATAATATGAGAACTTTTGTACAATTTGACTTCTTT  
AGAATGGATGATAGGTACCTTCTTTAATGCAGATTTTTTCTGGGAGACACCTGATACTTGAT  
GAGGGTTTCAGGTTTTCCAATTTGAATGTCACATCTTTAGAAAATCTCAATACATCCTCTTCT  
AGATTTAATCCTTTTATTTCACTTTGCTCAGCTCCTATTCTGCTAAAGTACACTTAATCACTG  
TGATTATCAAGGCGACATTCATGTTGTTGTCCACTCCACCATATCTTTCCACAACCTTTGTTGA  
CACCTGTTGCTTCGTATTTGCTTGTCTCCAAATTAGAGGTGAGATCACCAGTTTTTTGGGTTGA  
AACCTGCTGATACTGCTCTATGAAAATACCTCCCTCCGTTTGGTGCGACAACATGTTCTTCTA  
TGCTTCTGTATGTGGTGTCAGAGAATGTGCTTAATGTTAGATCTGAAATTCTTTCCAGAGTGT  
TCCTTGATTCTAATGATATGTTCCCAAACCTTTTACAAATCCATAATTATCCATTTTACATATCT  
CACAAGATCATACGCCATAAAGATCAATTTATTTTGGAAACATTCCTTCTATCTCCAAATCTCT  
ATCAAATTTTGTGGTGTTTACATTTCGTCCTGGTAGGCCACACCTTCTCATATGTTCTTGGTTT  
TTTCTGAGTAAACAAACCCTGATCTTTTCACTGGCATTATTAGGTTGAAATTTCTATCATGT  
GAAAGTTTTCTAATATAGGTAATTCTTCTATTTTTATAAAATCTAATTTTATTTCTATCTTCT  
TCCCTCTCAGTGTGTAATGTTTTTCAAGTATTGTCTCTTCTTTCTATCAAGGATCCAAAACCGTA  
TTGTTCTTTTAGTCCGTGCAAGGTATTCTGGAATTTGTACTCAGGCTTATGGTTTGCCTTCCAA

GCTTTGTTCCACATCTTATTCAATTTCTTTTTTCCCAACAAGAACGATAAAGTAGTTGAATTG  
TCGATTTTTGAGAAAATCTCTGAAATGTATTGGAACACAGAGCACTCATAAAATTTAGACAC  
AATTCTAGAAGAAAAAGCATATTTAAAAGTGTCAGTAATTCTACTTTATACTGTTCTTCATT  
CTCTTCATTGCCTGCTAACAATATCTCTCTCAATTCCTTGTTTTCTATTTTGTTGATCAATTCTT  
TTTTCAAGAAGTCTTTCAATAATGTTTTTGATCAAATTTACCACCTGTCATTGGGAAAGGTT  
CTTGATATAAGCTTCTGCTCTATCACTAACTTAACTAAGTCATACAACCTGTTTTTTCATTTT  
TTCCGTTATCAATAAACTTTTCGACATAACAGATTCTTTTCACATTTGATATTGAGTATCCTGA  
AATCATAGCATCGATGTAAGAAGTACAAGAACATCCATACATAGAATATGGTAAATACATC  
ATCATCATTATCGCCGACAACAATTGTTTCATTATTGTTATTGAATCTAAAGAATCCCCAAAC  
AATATCGTCTTCTGTTGGAAGTTGACTCAAGTCTATTTTTTCTGACACTTCAAATTTTTTAAG  
ACAGATTCTTGCATATGAGATATAAGCATTCTTGTTGGACAAGAACCGACCGTCCAATTCAA  
CATCTAGAAAATGACTGAATCTAATTACTTCTTTGTGTATCACTTTCAACACTCTAAAATTTCT  
TTAGTATCGTTTGTATCTTATGCTCATTGGATCTCAAGACTGATGATGTGTAACCACTATCAA  
TGATTGTCAATTGTTCTAGTTCGTCTCCCCATAACGTTGCTGCATTTGGTGTAAATTGCCATCA  
TTCTCTTGAAGTATTTTTCTACTGGTGTATCTCTATAATAATGGCACTTCAACATAGAACATC  
GCCCATTAGTAACTTGAGTTTGGGATAATTTGACCAATAGACCCATTTTCAAGGCATATTGTT  
GTATGAATTCAATGATTTTCATCTAATTTCTCCTCTGTCAAATCTTTTTCTATAAAAACACCAC  
ATGAATCGTCTGAATAAGTTGTTCCCTATGTATTTTGAAAAATTCAAAGCTGATAACATGTCCT  
CCATCATCAATTGTGACTGTATCCCCATAATGGACCAAACCAACCTTCAATAGCCCCCTTTCT  
GGTGTTTAGACACAACCTACGAAATCAGAGAAAAATTTTTCAAACAATATCTCAATATCAGAA  
AATAAATAAACCAAATTGGTCAGTTGCGACCTCTCGATTGAACCGTCTTCAAAACCATACAT  
GTCTGCTATCTCTTCTAAAATAAAAAGGTTATTTTCAGGTCTTTGTGAAGTATTGTGACCAGA  
ATAATCCAAAAATATTGAATAAGAATCTTTTTCGTCCAGGATACATGACATCTTATGCATAG  
TGATTCTCCTTTCATCTTCTGTCAATCGTCATCATTGGCCCTGGAATGAGTTTCATAGCTCTTTT  
GACCATCTCCATTATGATAGAAATGTAAATTTCAATTTGAACTTGCAACTCCGTAGAATCT  
TGCTTCTGTTTTTAATTCTTTTTCTTTCTCGACAAGCCGAACCTATTTTAGATTTTTTAAGAGAT  
TTCAAAGTTATATCTTTTTCTTGTCGTCAACCTCACATCTTTTTTTCTTTTGTTAGATCATCAA  
TTTTCACATCTGAACTAACTCACTTAAATTGTTCTGCGTTATATAGTAGATGAGTTCTTTAA  
CGGAATTCCCAGAGAAATCATATTCGTCCTTTGTGCATGCTTTATCAATAACCCTGGAATTTA  
TGTTAACTTCATTCCCTACTTCAAGCATCGCTCCTAATCTCAAAAATCTATATTGAACTGGGT  
CATTTATTATCTGGTTGTTATAATTTCTCCTGCTGCCATGAGTGTCAATTCTTGTTCTAATAC  
CGCCGGAGCATTGGTCAACTTCGGTACAGACCCGAATTTCTTCACATAATTTGTCACAACCTT  
CATTCTCATCAATTGTTGTAATCTCAGTACAGATTCCTTCTTAACTTCATGATTCCTGTTTCGTT  
CTTTGTATATATTTGTCTAATCCTTTTGTTTCAGATACCTCAGCATACACCAACACTTTTCCTA  
AACAAGACATCTTTATGCATGTTTCTGCATCAGATATATCACATATGTCAAATAATCTCATTG  
TTAATTCAAGCATCTTCATTTATTGAATCAACAATGTTGTCAATAATTGGTAGGATAGCTGAAC  
TCGATTTCAAGTCTGATAGCAATAAACAAGTTGATTGCAATAGCGAAGCCATATTTACTCTT  
TTTGGGTTATCTTCCTTAACTAGATCTTTGACAAATGATATGAACAATGCTTCTAAATCTCTT  
TTGGTAGAATCATTCAATACTTTGATCAGATTCAAAGTCAATGAATGATCGCATAACGTCAT  
AAAATAATTGTCATGTTTCCATCACCTAGTATCAGTGATCCATTCTTCTCATCATCTATTGC

TGTAATTGTCTTTGATAGAAATATCCTTATGATTCTTTCCTTCGTCGTTGACGGAAAGATAGT  
CACCTTTGTGAGACTTGTTCATCAGAATTGACTTTTGTTC AATTTTCCTCTGTTTCATGCTCT  
AATGACAATTGTGAGTAAC TTTTTCTGAAGACATGACAGAGTAATTAATCTTGATTTTGTGA  
TTTATTGTCTCAAGTAAATTGACTAACCACATGAGAGTTTTTGTCTCTGAATCGAGTTCATA  
TGCAAGTTCTTTTTCTTCATTATCTTCTTTTTATTTAAGAAGTTTTCAGCATTCCTGTTTGTTC  
ATAATCTAACAGTTTCACACCCAAATCGAATAACAGGTCGGATCTTCTGATTCGATTTTTAT  
GTCCGACATTTCAATTGAATAATCCTACAATCGCGTCCTGTGATGAGACGGGCTTGATTGATCT  
CCCTTCTTTTGTATGTTTTTAACAACTCTCTAAACCTCAATACATCAATCCTTGTTTCGTGTC  
CCGAAC TTCTCTGGGTACTTGCTACCATACATGAAGAAGTCCACAACATTTTCTGACAATGA  
CCTGTATGGCGAATCTATTTTATTTATTAATACTGGTTTATCTATATATGTGTACGATATGTA  
CTCTCTATCCCATGTCTCTATATATAAGAACATTTGTTTCATAATCTATCTTTCCTTTCTCTGGT  
TCCATCTTTTTTTCCTTTTTTTGTATTTTGTTTAATTTAATATATTGCTCTTTATATTTGTGCAT  
AAGAGCTGTAAGCTTCTGGTTCTTTTCTATTTTCTTCATCATCTCGTCATGTTTCTTTAATATT  
TCTTCCTCTTCCATAAGGTCTTCCAAATCTTCAACGAAC TCTTCAGACTCAGTGATAGTGAAT  
ATGTTTCATCCTCGTTGCACTGTTAGGGTTCACGTATGTTTCTGGTGTATTTTCATGTGATGAA  
TCAACACTAGAATATATTGTCTCCAAATCTGACTTTTCACTTGACCACTCCATTGAAAAAATT  
GCTTTTGTGCTTGTTAATTAATAGCAGTTGTTATTTCTCACCATGTTTTTTATTTAAAACGACA  
ACAAATGTGATTTAAAACCCCCATTATTTCTTTTTCAATGTTGACTTTATTATTTTGATGATCT  
CCTCATATGGTCCTTGATCTATTGTCTTTTGCTACATTATTCATTGATCTCATCATGAAGACA  
GTCTTTGCAACCCATTGTTTAGTTCTACTTGTCTTTTCAACAATGGTTTCATTATTTGAAAAGA  
TTTCTCCAATCGATCTGCTCTTCTGATTTTCAGCCATGTTTTTTGATAACCAAAGATTATTAA  
ACTTTTTCCATTTTCTACAAAGGAATTCTTTTTCTGATCTAGAGAGCATTGGGTAAATGTCAT  
TCTCTTG TGAACTTCTGTGACAAAGACGTCGAATCCCTCCCCGTCATAGAATATCATATCA  
GATAATAAGTTTATAAATTCCGTCGAGCTAAACAGACTCGCTTTGAATTTAACCAATTGTAA  
GTCTATTCCGTCTTTAATCAATGCCGTTTCGAAGTTGACGTTTTTGTGTAGTTTCACGGTTCCT  
TTTATCATTGCCATGAATTCATCTTCATTTTTTGACTCTCTTATCATCCAACAACCATGCAATT  
TCCTCCATTTTTTCATTGAATGAATTCTCTTCTATTTTAAGGAATTTCTCGTGAATCACATCCAG  
GTCTTCCCTGATCTTGAATCCCATATTACTCATTTCTTCTTTTCGACACTCTCATTTTCATGAAAT  
TGAGCTTCACCATTTGGATTCCAATAGATCGAATTTTCATCTTTGCTTTTGTGAACTGAAACTA  
TTGGAACCTGTAAGCTTTTTCAAAAAATGAGAGTG

>Seq28 [organism=Chrysanthemum ophiovirus\_mori] RNA2 genomic sequence

CGATCCTGTATATGACAGGGTTTCCTCATTAAGAGATTAAAGATCGCATTGATCCGAGTTTG  
TGTTATTTAATAACCATTCTAAGTATCACCGCTTCCGCTCAACAATTGCTTTTCCCTTCGCTTC  
ATGCTTCAGTTCGAACCTCTGCTTCAAGTAGCATTGGCCTTCCACAATCCACTTCGTCGGTAC  
TAATCCCTCATGTCTTGCTTAAACGGGTACTGGAATAAAACCTACAGGTTCAATTTGAAAAT  
AAACATCGCTTTTCTTGATTCCAATGATTTATCCATCTCTCTACTAATTAGTTGCTTGAACAA  
AGTCACCTGTTGGTTTTATT CACAAGAGTTTTATTTAAAACGACAGTTACAAGTCATGAATA  
ACTCAAAGAAGATGTTTTATAAGACCTTCAGTTACGACTTGCTTATTTAGCTTAAATTGACTA  
GGGACATAAGTCGTTTTAATTAACTACAACACACAATATTTAGTATTACACACTGACACAA  
AATACTAATGAGCATCGACTTATGGAACAATTGGAAAATCAACTAGCATGGGACCACTAAC



TTAGATGGTGATCTTTAATGTTTGTGTTTATCGGTTATTTTAGCTTCACTTTGGGCCACATGTCA  
TAGTTGAAATGACACGTTTCATGACCCCTTACTTGAATTTTCATTGTCATCATATCAGAGTATG  
CATTGCTGACATCCTCTTATTGTGTCAGTGACTTCCTTCCATACACTATCCTTCAACCACATTCT  
ACCCTCTTCACTTGTGTCAAATACCATCACAATTTACCTTTCAACTTCAGAAACAAAGAGTT  
TCCAGCTGTTGTCATCTCATCCACATGCCCCGTCATTCCTTAACATTGAATAAGACAATATGTT  
CAATCCCAATCTCTTGTCTGTAAGCATGTAACTTCCTTCAGCACCATATCTTTTGTGTCATAGT  
TCTGAGCAGACATTCAGCTTTCTCAACTTCAATCTCTTCAACCCCCCAATATGTTTGATCAC  
ATCAGTCTTATCAATCTTTTCACAATGTATGAAATGATCAGCAGAGCCAGTGTCAAGTGTG  
TCAAATATTCTTCTCCATTTCGGCAACATGTACCTGTGTGTCAACAGTGGTTCAATGATGGGA  
GGAGGAGGTGCATCTCTTTGACTTGCAAGATAATTAGGCAGGACACTTATGCTTTTTCTTGC  
AGCATCCATGAAATCTCTAACTCCTTCAGAACTATCTGAACTTTTACTCTCAACATCAAAGTC  
CAAGTATTTTTTGTCTTCTTCTTCTTCTTCTTCTCATTCTCTGAGTTTTTCTTATAAGCCTCTT  
TTTTTGTCTTAGCTCTTTTGTAACTTATTAGCTAATGAATTGAAAACAGACTTATTGTTGAT  
GTCCTTAGGCCTTGAAAAAGAGTCAATATAAATGACTGTTGAAGGTTTCTGATCAATTTTTGT  
CGGTATTGTCTCACTATGTGCATAAAAAGCCACATTTAGAGACCCATACTTTCTTCCTGATAT  
TGGAACACCTTCTGTTTCAATGTGAACTGTAATTTCTCCACATCCTTTTCATAAACGAAGAA  
GTCCATTGACAATTCAACCATCGCCATTTAGATGCATTGATTGTCACTTGTGTATGACCTC  
ATCATCTGTTGCTGCTGTGTCATGTAGTCCTAGTGTATAGTTCCATTGTCTTCTTCTGTTTCT  
CTCTGGCTGAATAGTGGAACGTAAAAAAATTGGACTTTGTCAAACCTAATGAATTTCTCATT  
AGATATGACTCCTTTTGTGATTGAAGTCCAGATCTGTTTCATCGTTGTCATCCTCACTCTTTTT  
GTGTGTTTCGTCTTTTGTGAGATTTAGCACCATTTGGAATAATTCCAGTCTTTATCGTTCCTTTTCG  
ATATATTGACGAAATCTGATGTTATGTCCTCTATTCCGTCAGGGATTCTCCTTCTTGATCTCT  
CAGAGAGATGATGTTAACTTCGCCTTTCTTCACTATTTTGTCTGCCACAGACACAGCTTTCAT  
CCTGCTTGTACTACTTCCAGATTCCTTACAGACCTTGCTGATTCAATCCTCCTCGGACCTCC  
ATACGAGTATTTTGATACTGAAGACATTTTCGCTTTAGACGATTACCTCTGTACAACCTGCAA  
ACTTTGATCCTTTAGATCGGAA

>Seq29 [organism=Chrysanthemum ophiovirus\_mori] RNA3 genomic sequence

GCAGTATTTTCACATTGATTTATTTAAAACGATAAAAGTGCACACCTGTGACCCTGTAAAGT  
TGACCACCAGCAGCAACTCGTCAAGATCACAACATCACTCTAATTTTTATAGAAATACAAGA  
TGAAATTATATTATCATTCCAAATTAATTCATCTTATATGCAGCCTTCAAACCTCTCTGCAGTA  
ATGTCAGAGAAATCAGCATCAGGGTTGGACAAGATAGGCCATGTGTGTGAGTCACCATCCTT  
TATTCCAAAGAAATTGACGTCCTTCTGGAACGCAGGATTGTTATCAGCTACTATCTTCTGAG  
ACATGGCTATCAGCCCACTTGTGCTCAGCGAGAAAATTATCGCATGAGTAAGCTTCAAAGTG  
AAGTTTTTGATGGTTGGTCTCTCAGATGAGAGTGGATGCATCACAAGTTGAGAAGTTACGTT  
CGTCGCCACTTGTTTAAGACAGTTAACGATGTCTTTTGACAACTTCAGTTTTGAATTAACTT  
CATTATATCCTCAATCTGAGTAACAGGAGTGCCTTCAGTGATCTTCAACTCTGATTTGGTGCT  
GAAGGGGCTAGCATACTTTGCATATCTCACAGCTCTGTTCCCTGCAATATTCAACTTACACCT  
GGATGAAACAGCAGGAGGAAGAATATCAAGTTGGATCTGTAGAAACACCTTCGCAGGAAAT  
TTCTTTGTGTTAGCACAAGAAAGTTGTTCTCCTATGCTCAGCATGGTCACAGTCTCTCCAGAA  
TAGATTTCCCTTTGTTATGAACTGAGGAACTGGAGTCTCAGCAGAGTTTTTCCCTTTGTTTTCT

GGCAATCCCCCTTGAATGTACACAAGCACAGCAGCTGCTTGAATTGCCCTCTTTGCATTGCTC  
ATGTTCACTGCAATTGTCCTTTCAGATATTCCTGATGTTTCAACCAGTTTAAACATTCTGTG  
TTGTCTGGTGATTGTGCCATTGCGCAGTACAAGATAGCATCGAGTACTTTTGTTCCTGCAGCA  
ATGAGCATGTTGACATCAGCACCTCTTCCCCAATGTACTTGATGACAACTTCTCCAGAAAC  
ATATCCTTCATCACCGAGAGTGACACTCTTAAGGAAGTTCTCGAGATGCTCCTTGATTTTTGA  
GCTATCAATCGAGTAGGACTCAGACTTGATTTTAGCCAAGATGGTCGCTTTATCCTTAAGTA  
GTGTGTCGGACAGATCTTCGAACCTATTCTCAGAATTCTTTTCATTATCATTGTTCTTCTTATC  
TTGATTGCTCTGCTGATTCTTGTGTTGATCTTCATTCTTATTATCAGCAACTGGTACTATTTTC  
TCCCCTTCAAGCATCACTAGTTTGTGAGGGTTGATTGACTCTTTTGCATTGTTACCACATTA  
TTTGTCAAGTGAACCGTTATCATGAAGTAATTTCCATGATTTCAAGTGTGTTCAATTTGTTCT  
CCGGTCAATTTGTCATTGCCTAAAGTTTGTGTAATCTCGATGAGAGCTTGGAGAGACTTGGC  
TAAGATGAATGTAGACATTATTTAGTGTACAATTTGGAAGTCAATAAATCTTAAATAAGCAA  
GTTTTTTC

>Seq30 [organism=Citrullus ophiovirus] RNA1 genomic sequence

TTTTATTTATAAAAATAAATAATATTTTATTTCTATACTAGAAATAGTATTGTCTTTTGGGTG  
ACAAATTGATGGCGCAATGCCTTGAGATATCATTCTTCCGACCTTCTGTTGAATTCTCAATTA  
CTGTTATCGTTTTTCTCTGATTTTCTACCCAGTATCTATCCATGCTTGTGTCTTTACATAACAA  
TCAATCTTATGACACTATTTCGAAACCTTGATGTACTAACTGGTTGATTCTATAAATTATCGC  
TAATAAATTGTCACTACTGGATTGTTTTTGTCTCTATTGTGTTTTAATAATCATCATCTAT  
AAAGTCGTCATCGTAACCCTCCTGTTCTTTAATCATATCTTCTAAGGACATGTTTTGATTTATT  
TGAGTGAATTCCGGATCTAAACCTAAAAATGAGCTTATGACATCTTTCAGTTCTTCCTTAACA  
CATTCTCTGTAACAGGCAATTCTGCCAATTGGTCTTTTGCTACATTCATTTGCCAGAAAGT  
TCTGTTATGACGTTTCCGCGTATACCTGTTATCAAGCCGTTGAACAATTCATTATCATCTAAC  
GTCTCTAGGTATTGAGATAGGCTGTAAATCCAGCTATTTCTTTAACATTGCTACCTCTTCA  
TCATATGTAGATTCTGTCTTTGCATTTCCCTCTGCTATGTCTTCCTTCATCTCTTCATAGCTCC  
TGGATCTGCTTGTATTCTCGAGAGCATCATAATCTCTCTCACTATCTCCCTCCGCTAACAC  
TTCTTTTTATTTCTATATCCATTGTTTTTATGATCTTGAGTATTCTATTGAGCAATAACTTGAA  
GTTCAAGCAATCATACTTCTGGCTTTGTGTCTTATTTTTCATCACTAACCTGGTATTTTTACC  
TTTAATCCTAGCAATCTCATTAATATTTGAGGTAATTTCTTGCTTTTGAGGCCATTATAACA  
AGCCTCACTATCCTTTTTGTCTTATCAAGTGATCTAATCCCTGTCTTGATTTAACGCCTACCT  
CTATTGATTGCATGATCTCACTAAATGAGGTTTCATTTGATGGGCTCGTCCTGATGAGCTGGT  
TTATGGTTTTCCAAGTTATGTAGCTTGACCTGTCAATCCAACGGCTGTCAATGATAGCCTCAG  
AGATTAGCTTTATGTCCCTGCTTGAGTTTGTGCTAGACCGACAACAAACCTCCCAGATTTCA  
TTCGTTTTGCAAGACTGCTGGTGATTGTTATTGAAGGCTCCAAATTTTTCTTAGGAATTCTT  
GTGCCAATATACTTTTTATTATGCCAAAATTTCTATCCACCTTTGTTATTTATCTCTATCTC  
TGGTTTTGAGATATGTATTGTGGTTGTGTTCTCAACTTTTTCTATCAGTCCGTCCAAAACATG  
ATCTTCTAATTCGACAACTGCCATTTCTCCAATTTTTCTACCATTTTGTATTTGGTCTCAAAG  
GACACGGTAGATGGATCATCTTCTCATTTTCTCTGTCATCACGGAAATCAACTGTTTCATCA  
GATATCATTTTCATGTGTATGGTCTATCGAGTTTACAATAGCCGATTGAAATAATGATCTCTTG  
CTGAGCTTTAGTATCTCATTCGTCAACTTTTCAGTAAAAACCTCATCAGCAAAAGATTTTTTG

ATTCTTCTTTCTGTCCTGATTTCTTCTAGGGTTTCCTCGCAATTTTCATAATTACTTGAGCATT  
TTGACATGGCGACTCCATTCTTATTTGTGACTATCGATAAGTATATGTATCCAGGGGATTCTA  
TTGATGGAACCAATGCAGACACTTTATGCTCCAATTTCTCAGCTTGTTCCAGTATCGAGGTAA  
AGTTATATGCTGCTATAGAATTCAATCTTATGACGATATCTTTCTTCAAGTCCATGATGTCAT  
GAATCATAGTTATGATGTTTGTCTCTTTCCCAGAGAAGTGACTTACATCTAATATGAAGAGG  
TCATGATCCAAGTAATTCTCGTAATGTTCCCTTCATGGTCATGTCAATTGACGATTTGACCTCT  
TTCATTCCAGGGAAGCGATTTATTAAGTTATATCCGTCATTACGAGAAATGGATGTGTGGTC  
TATCCCTTTGCTGTATAAACAGTAGTGCAGGTCACCTCTTCCTCCGAACATGTCACAGACTTT  
AGTCTCGGCAGTTATTACATGAGTGTTTCATCAAGTGATTATTAGCCCTACGGAACTGGGAT  
AGACATCCGACATTGTTGGCGATGACACATGCTGAGGCTTACAATGCAATGCACAGATCATT  
TCAAAACCTCTCACTGCTGCCCTCACCGAAATAGGGTCTTCCATAGTTTCTTTTCTCAATTCC  
ATTTCTGTGTAAGTGATGTCACCGTACTCAATATTTCCATCATTATCTGATGCTTCAGTAATG  
TAATTTTTTATTTCTGAAGAGTAATATGACAAGACCAGGTCAGGGGAAAACCTCTCTTCATT  
GTAACCTCTGATAGATTTCAATTCACAGCAATGTACATTTCTTCATGTGTGTATCCCAGAGTCGG  
TAGTGCCATAAGGAGCAAGTTGCTGATCGCTTTGTCTTTTATGTTGAAGTGTGCTTGCCCTTT  
TCTCAGTCTTTTCAAATTCACGTGTGCGTTCATCTTTGTCTTGTCCTTGAGTATCTGTATCTCA  
AGAGTATCTTCATCTTTCTCGACTATTTTGAAAACCAGGCATGATGCTATTATGAATATCTTT  
AATAGTGAATTTCTATATTTAAATGAATAACCTAACTCATCAAATTCGCTTTTCATCCCTGAA  
TTCTTCTTTAATTCAGTGGAAAATATCTCATGGTTCATCATGGATCGCATTACTGATTTTGTCC  
TAGATTCATTACCAATGATGTTTCATGCTTCTGTAATAAGAATAGAACCTTTACAAAAGTTCT  
CTCTTAACCTTCCTCCTCCGATGCCTCCTGTGATTTTTTCTCATGTCAGAATCTGTTATTTGATC  
TGGAGTTAATAACTCTTGGTCCTCCATGTATTTTTTAAGATTTTGAAATGAGCTTATGTGCTC  
TATTACCCGTTGAGGGACATACGTTTTGTGATCCAGGAATTTGGTCTTTATTTCTTCATCAGA  
TGATACGTATAACGAGTAGCTTCTGTATAGGGATGACTTCTTGAGTATATTTTGCGCATCTGT  
GTTTATGATTTTTCTTGATGATTCTTTCAGATTCCTGATCAATGGACTGAATTTAGTCGCATCT  
TCAATGCCTTCTAGGTTGAAACTCACATCCCTGCAATAATTTCTTATGTCTTGATTCAAATTC  
AATCTGCTTGTGAGGTTATTCTCAATCCTTAATTCCCCTAGTAGGACTTTCAAGTAAGTGATT  
AGTAATGCGACATTTATATTGTTGTCTTCTCCTCCATTATTCTCTACAACAGAGTTGATTCCA  
GTCACCTTCAACTTTGTTGGAATTGATGTTTGAGGTCAAATCCCCTGTCTTAGGGTTGAAGTTA  
GCCGATAATGCCCGATGAAAGAATCTTCCACCTATGGGTGCAACAACAGAGTCGGAGATAT  
CATCGAATCTACAGTCTGAAAATGTTTGCATCGTTAAATTACATAGGCTTATCAGGCTAGAT  
TCAGTCTCCTTGCTACATTCTGAGAATTTATTTAAGTCCATGATGATCCATTTGGTATATCTA  
ACGATCTCATAGCACTGGAAAATCAACTTATTCTGGAACATCCCTTCAATCTCAACATCCCT  
ATCAAATTTTGCCAAGTTGAATTGTGATCGCGCTGGGGCCGCTAGTCTCTTTTTGGTTTCGAGT  
GTTATCTATGACCAGATTCGATCGTATCACAGGCTTAATTGGGCCTAGCGGGTCCACAGTGA  
GGCAGCCTATTATTGGTATTTCTTCTATCTTCAAAAAGTTGAGATTTATCTGGTGTGATTTAC  
CATTTAATCTGAAAACTTCTCTGTGTTGTCACGCTTCTGCACAAGGTAGTCGAATATTCCAT  
CATATATCATTACGGGTCTTCATTCTCTTGTAACAATATTGTGATTTTTTGTCCATGCTTT  
GTTCCAGAGCTTGTTCAATTTCTTCTTTCCCACAAAGAATGACAACGTTGTGCTGTTATCGAT  
TTTGGAAGTTATTGAGTCTACGTAATCAAACAAGGTTGATTCTGCAAATTTAGACGCTATTCT

ATGGCTGAACTTCTTCTGGAGTGTTTGCAATAATATAATCTCAAAAATATTTCTGTCATCTTC  
CGAATTGAGCATTAGCAATTCTTTCAATTCTTTGTTGTCTACTTTTGATGGTAAGATCTTCTTC  
AACTCATCAGACAATAGTGTTCGTGTGCAATCTGCCTCCAACCATTTGGAAACGGTTCCTTG  
ATGTATGCTCTAGCTGTAGTGGACAAGTTTATCAAACCTTCTCATTATTCTCTTTTTCTTGTCTG  
AAATTATAGAGTAGACATAACATAGTCTTTTGACGTTTGAATATGAAAATCCTGATATCATG  
GTGTTTGGTAATGGTGTCAATTGAGTATCCGTATGTTGCATATGGAAGGTACATATTCATCATT  
ACTGCTTCTAGCAAGTCAACATTCTTCTCATTGAAACGGAAAAAGTTTGTTGTAAACTCGTTT  
TCATCTGGTATATCTGCTTCGACAATTGATTCAAGTTTTTTCACATTTTTCTAGGCAGAGTTTC  
GCTAGTACCAACATGGAATGCTTGCATTGCAATGTTCTCCTATCTAACTCAACTTCCATAAAC  
TTCGACCATTTTATTAACCTTCTCAACAACCATCAAGTATCGTAAATTCCTCACTACCATC  
TGGTGAACACTTGATCTGATCTTGTGTGCTTGAGGTGTATCCACTATCAATAGTCGATATT  
TTCTCTATGTCGTCTCCCCATAATATATCTGAATTTGGTGAGATAGCTAGTATTCTTTTGTA  
AAGGTATCGACAGGACGATCATCAAAGTAATGAGTTTTTCAGCATGGAGCATCTTCTGCTTGT  
CACTTGGGTCTGGGACAACCTTAACAATCAGTCCCATCTTCATTGCATAGTCTTGTATGTATCT  
TATTATGTCATTTAATGATTTCTCATTCAAGCCCTTCTTTGTAAATACGCCACATGAATCATC  
ACTATATGTGGTTCCAATGTATTTGGTAAACCCTATTGATGTCAACATGTCCTCCATCATGAG  
TTGTGATTGAATCCCCCATATGGGACCAACCAACCTTCAATAGCCCCTCGTTGATGCTTGG  
AAACAAATACATAGTCTGAGAAAAGGTGTTTCATATATTACGTCAATCTTATTGAACAGATGG  
ACTATGCTTGTAATAATTTTTCTTTCTGGTGATTCTAATGCAAATCCATACATATCCGCAACT  
TCCTCAACTATGAATTCAGTGTTTTTCAGGCCGTTGAGAGGTGTTGTGTCCTGAGTAGTCCAAA  
AAGATTGAGTATGAGTCAGGTTCATCCAAGACGCATGACATCTTATGCATGATCTGTCTACG  
CTCATCTTCAGTCATAGTCATCATTTGGCCTGGTATCAGTTTCATTGCACGCTTTATCATTTCC  
ATTACGATTGATATATAAATTTTCAATTTAAACCTTGCCACTCCATAAAACCTTGCCTCTGTT  
TTTAACTCCTTTTTCTTTTTCTACTAGTCTGACAATGAAGGATTCTGTAAATTAACAATGAT  
GGGTCTTTCCGTTTCCTTAATGAATAACCGTCTGTTTTCTTCTTTCCAACCCTCTGTTTGCCGTT  
CTATTTTAACTTCGTTTATAAGCGATTCTAGATCATTCTGGGTGACATAATAGATCAGCTCTT  
TGATAGAATTGCCCTCAGGTGAGTACTTGTCTTGGTACACGCCTTATCTATTATTCTAGACG  
TTATGTTTCGTTTCGTTCCCAGGCCTGAGCATCTGGCCTAACCTCACATTGGCATATTGCGCAG  
GGTTGCTGATTATGTCGTTATTGAAACTACCTCCTGCTGCCATCAATGTTAGCTCTTGCATCA  
GTGTGTAGCTGGAATTCAGTAGTTCGGGAACAACACCATATTTTCTTACATAAGTTGTGACA  
ACTCTCATTCTGAACAGCCTTCGTAGTCTCTCGACAGATTCCCTTAACTACGTTGTGGTCACGG  
TTGGTTTCGTTGTGCATATTTCCCTCAGCCCTTCATTTTCGCTCACTTCAGCAACTGTATGTA  
TTCCATAACAAGACATCTTACACAAGTATACCCTTGGGCCTCGGTACAGATTCGCATCAAC  
TTTTCTGTATGTTTTGGGGAGACTTGATATGAGTCCAGTAAATTGTCTAATAGCGGGAGTGTT  
GAAGAAACCCCTTTTCATGTCAGACATTAAGAGACAAGTCGCTTCGTACAATGCTGTCATCTC  
CACCCTGTCCTTTGTCTTCAGTTCTTTTAAACGATATTATATAATCTATAAAAACGTTGTCTTCA  
AGGTTGATGTTTCGATGATTTGTTTAAATCCTTGCAGATGTTTATCACCATGTCATTCTCAAGA  
TTCATCAAGTAGTTCAGCATGGCACTATCCCCAATCACTACCTCATTGTCTTGGTTTGTA  
ATATAAGTGAAAGTCTTGCTTATAAACATCTCAAATTCAATTACGAGATCGCAGAGAGCTGA  
TCTTACTGTTACCCTATGTAATGAAGAGCCGTCCAAGAATATCACTGTGTCAATCTTTCTGTT

TTCGTGAAATTTGTGTGAATTCTGATATCCGGTGCCCTTGTTACTAAGGCATGAATATGATAT  
TTTAGTTTTCAAGTTTATTGTGTCCAACAAATTTACCATCCACATTAGCTTTTGTGTCTCTATA  
CTGGGTTCAATCTCCGTTGTGGTTTTCTTCCTATAGATAGGTCAACGTGACTCATCAGGGAT  
GCCTTATTTTTCTCATATTCATGTTCCGCCAAAGATTTTGAGAATTTTAATAGTGTGTTCACT  
TGTTGCTTTTGTTCCTCAAGACTTTTATCCAGTTTATGAAGTTCAGTATCTCGTCTTCTGTTCC  
TTGTTTTATCTTTAAGACATCAGACCTTGACATAGGTGAGATGGCATCACGTAATCTCATCAG  
GTCAATTTTTGACCTCAGTGAAAATTTTTCAGGATAGTCTTTTCGAAAAACAAATTGATTGAG  
ATTGGATTTGCTGATAATTTTGTAAGGGTTGTTTCAGCCTAGAGATGAGCGCTGGTTTGTCAAT  
GTACTGTCTCATTTCGTCCCTCATCTTTCCTCCTTCCCAGTATATCAAGGTAGATTGGAAATC  
AAATTCGGGTTTCTTTGGTTCAAGGGACTTCTCTGATTCTTTGCCATGGATAAATCATAGAA  
CTCTGTTTCTTTGCTCTCTAAGAATTTGAAGAAGAAAAAGTGATTGTTGTCCATAGCTGATTT  
TAGTAGTCTATGATATTCCTTCTTTATATGCTTATCAGGTGATACATGCATGGGCTCTCTCTC  
AAGGAACGTAGTAGTGCTTTCATGCAGCCCATTATCACTCCTAGTAACTTCAGATGTTATTG  
AAGTGTCCATGTCATCTTTTGACGAGATGAACGTTGTTTCTTCAGAAAAATCCATTGTGCTCA  
AGCAGAATTGATTGGTTCGATTATTTCAACTGTTTTTTATTAAACCGAATTTGCATGATAAGT  
TGGTCCTCACCTCTCAAGAGAATCATCAAGTTGAAAGAGCACACATGTATGAGCATCCTTTG  
AAAAAGATTTAGAAATTATCTTCTAACCAAGCTTTAACTCTCTCCCTCTTTAGGTCCCTGTCT  
GATCTGATATAAGACAGCTCATCTTTCGAAGGATAATTTATGATTATTGCTTGGCCCTTAGGT  
ATTTTACTTCTGTATATCAATCCCATGTGATCCAATGACACACCAACTCTATTCATCAAGGAA  
TAAATGTAATTCTTTGTCCTAGGGGAAAATGAATTGAACCAGTAATCATCGGAATACGGCCT  
GGACATTTGTTTTATGAATTTACGTGATATCATAACTGATGTAAGGTCTTGAGACCACACTAT  
GAGTTCAAATCTTGACACAATCACCTTAGCAGATTTTATTAGATCTCGGGCTTTAGGGGCAA  
CATGAATCATCATTTTATTTGCATAATTGTGGTTTTATCATTGTCATTTCTGGGTTTTGCCCA  
AACTTCAATTCTGCAATTCCTGAATTCTTCATAATCTCTTTTTCTTCATTGAGAGAAATGG  
TCTCAGGCCAAAAGTAGCTATTTTCTTATGTTTGTAGATTCTCTTCTCTCAATTCTCTCCTC  
TCCCTGTGCGCTTCTATTAGACTGAATCTATTCACTTTGACTCCTAGGTTTTCCATAGTATCA  
ATTGAAACTACCACCAACCATCCTCATTGGTAATAAAAGAATCATTCAATTTCTTATTTCAT  
CTTTTTGATATTATTACCCTCGATTCTAGGCTTTTGCTCTTTCCTGATTCCATGAGATCGCTGT  
GGCACGTCTTTAAGTCTATTTGTTACTTTGGCTATTTTTTCGAAAGAAAAATTATCCCGCCCCA

>Seq31 [organism=Citrullus ophiovirus] RNA2 genomic sequence

TTTTGCGCAAGTAAAAATTATCTTTTAATCATAATTATTATGATCTTCCCCATTACAGGTGTT  
TAGAAGCGCAATGCTTTGATTGGACGACAATGACCATTCTCACAAACCCACCTTGTCATTTA  
GTCACCTTTTCTTTTTATTAAACCGAAAACACATTAACATAGCAACAGGTAAGAAGATAGCT  
TTGATAGAAGCATAACAGAACTAGACACATCAAGAGAAAAACTTGATCATTGTCAAACCA  
CATTAGGGCTCAGTTATACTCTAATTAAATCACAGACTTTGACTTTCTGAGCCCTTTCTTAGA  
CATATAAGCACTATATTGGTTAGCTGACATATTTCCGTTTTTCAGTTATCTCATTCCAGATGTT  
GTCTTTTAGCCATACTCTCCAGGTTTCGGAGCTGTCGAACATCATCACAATCTCTCCTTCCTT  
CTCTAAATATGTATTGTCGCCCTCATCTCTCATCTTATCTATTATTCCTGATTCTTCAATTTG  
GAAAACGACAGTACATTCGAGGCAAAGGAGTCATCCGAATAAAGCCTAACTTCACCCAACT  
CAATCCTGTTGCCAAAGGTTACGATGAAACCAGTGGCTAATTCATACTCAAGGTTTGAACCT

CCTCCGACATTTTCATCCACTCCATCAGGTTGAATAGATGAACAGTAGAAATAGTGTGAACC  
TGATCCTGTGTCGAGCATGGTTAGAACATCATCAGTGGTAGGAACTGTTATGGTTCTTTTTTC  
TTTTATCGGTACACTTTTCAGAAACCTAGGAATCATGGATGTGCTCTTTCTGGCTTGTTCAAT  
CAGTGATATCACATCATCTGATGATGAAGACTCCGAATCCTTGATGTTCTCGTGTGTTGTGA  
TTCTTTTGTTGAGATTGAAGTATTGTCTCTCTTTTTTCAGTTCTTTTCTTCGCTCGTTTCTTCTGT  
TCTCTATTTCCATTCTCTTGATTCTCTTTTTTCTTTTTACCTCTTCGGAAACTCGATCACCT  
AAGCTCTTGAAAATTGTTTTCTTATTCAAATCTACTGGACATGCTACATCGTCGATGTAGAGT  
ACTGTGGTCTTTTTTGTCTCACACCTCAATGGTATGGATTCTCTTGAGCAAAGAAGGCCACA  
TTTAGGGCAGCATAGCTCCTCCCAGAAATCGGCACATCATCAGCCATAATGTTTATTTTTATC  
TTATCCATGTCATCTTTGCGCACGAAAAAATTCATAGACAACCTCCACTAGAGCCATTTCTCCT  
GCATCTATTGTTACTTCTTGAATGACCGGATCTCTGCCTGATTCTTCTCTTCCTTCATCCAACA  
ATGCAAATTTACTTTTCCATTATCTTCCTTTCTCTGAAACAGTGGTATGTACATGAATTG  
TATCTTCAGAAACCTTACAACTCTTTGCTAGTCTTACCCATGAGACTGTTTATCCCTTCTAT  
GACCTTTTTCATTTGTTGCCATGGTGAGTTTTTCTCTGTCTCCTCCTTCTTCAGCTTCATCACC  
ATCGGTACGACTGCCGTTTTTATGACTCCCTTTGCCATGTTGCAGAAATCAAAGTTAGTTCT  
TCAATTCCTTCAGGCAGTGCTCCTCCATCTTTAAGGCTAATCACGTTTATCTCGGAAGGTTTT  
AAAGAGTAATCAGCAAGATCTTTCGCTTTGATACGTCGTTTTGATTGCATCCTAGTCATCCG  
AGATTCATGGTTCAGTAGTGCCATTTTTCAAGCTAATAGTGATTACTTATCAGCGGGATG

>Seq32 [organism=Citrullus ophiovirus] RNA3 genomic sequence

TTAAATTACTATTGTTTTTATTAAAGCGAAACGTGCATAATCCCACCGTATCAAACCAACAA  
AGCTTTCAGCGGCCGTATGCTTTCTTCAGGGCCTCTTCAGAGATAGACATGAAATCAGCGTC  
GTTGTTCTTAAATATGCCCAAGACCTTTCTCCGTCTATCAGTGTCCCATCAAGTTCTCATC  
CCGCAGAAACGACGAGTTCTTTCTGCCATTACCTTGTTGCCATTGATAGCCTTCCTTCTGA  
TGTCATGCAATACAGTATTGCACACGTCAGCTTGAGAGTCATCTTTGTACACTTGGCTTAGT  
GTCAGATAGCGGGTGCATACAGAGCTGTGCTTTGTAATCTCCGTTTAGTGATCTTAGCACTG  
CTACTAATTTCTTTGCATGGGTAGCTTGTTACCCTCATCAAAAAACATCTTTAACGTTTCTG  
CAGGGACGTTCTCTGGAAGCTTAGTTTCTGGTTTCTCTTGAAATCCTGAGCAATAGACTGCAT  
ACCTGATTGCTCTGTTCCCAGCAATATTCAGCTTGCATCTTGATGCAACGGCAGGTTGAAAG  
GAGTTCAAAGTCCAGTGACAAGAATACTTTTGCGGGAACCTTCTTGTTGAAGCAACACTGAG  
ATCACTTCCAATTTCAGACATCGTTACATTGTCACCCGAGTATATCTTTTCTTTGATGAATCTT  
GGTACATTCTTTTCTTCTCCATCAGATTTATTGGGCAAGGTTCCCTGTGTGTACACCAGTATT  
GCTCCTGCCTGGATAGCTCTTTTAGCTGCATGAAGATTCTAACAGCTTCAACATCCCTCAGA  
TCTTTTATCTCCTCCAAATTGAACAAATCCTCAGATCCCTTGACTCCTTCATTGATTTGAAT  
ACTATGGCATCTAATATTTTTGTTCCAGCAGCAACCAGCTGTGACACCGATCCAGTGATGTCT  
TTGAAATATTTTATGTCTAAATCCCCACAGTTGTAGCTTTCTTCTTCGACTCCGATAGTAGTC  
AGAACTCAACTAGATATTTCTTTATTGAGGTGTGATCGAGAGAGATCGCTTCTTTTCGAAT  
GAACTTTTCTAAGTCTTCCTTATTTTAAACAAATTCTCCTGTTTTTCTCACAAGCATCTTTCT  
AAGATACCTTTGTTCTGTCTCTTCACTCTCCATCTTCTCTTCCCTTTACCTTTCCTCTAGT  
CCCCGACCCACTGTCCTTGGAATCGACTTCCACATTTCTCCTCCATGACCTTATACTCCCC  
GTCTATGATCACAAGCAACTTACTGGATTCCCTAAATTCGCATGCTCTGTGACCTTCGAGTA

AGCATTTGCGTTGATTCCCTCATCTCCTATAAGCTTGTACTTTCTCAGTATCGATTCTGTCTCC  
TTCTTCGTGTCTTCTTTTCCAACCGTGTAATCATCGATAGCTTGAAAACTCGCTTCACTGCA  
TTCCATTGTGCCATGTTAGCTTACTCCTCTTGATTGCTTGGAACTTGAGTGATTTTCTAATG  
AAAAATTATCCCCCGC

>Seq33 [organism=Conopholis ophiovirus] RNA3 genomic sequence

AGCAGAAATATATAGCCATAACAGTCAGCAGAATATATATATTATTTATTTATTTAAAGCGA  
CATGGAATTGTAAACAGAACAAATGCAAGATTTAAAGATGAACAAAAGCATAACAAGTTAAA  
GAAGTCCATAATAACTCTTAAGCTGCTCAACTGTTATGTCGTTAAAATCAGCATCGGAGTTA  
CTCAACACCGTCCACACATGGACACCACTCATCACAGCACCATAGAAATTCTTGTGAGCCTT  
GAAGGACTTCACATCATCATCAATTTTCTTATCATAGAGACCTCCCAATCGGTGATA  
AAGACTCTAAGATTGCCCTTATTAAGTTCAATGTTAGGTTTTTAACAACAGGTCTAGTAGGA  
CAAAGTGGATGCATACGTAAGTGCGCCCTCCAATTTCCACTTAACCCCTTAGAAAAAGAAC  
AATGTTCTTAGCTCTTTTCAAGTTTCTCATTCTTCCTCATATATAATTCCCATTCTTCAGCAGGT  
GTATCATCTTTGGTCAATTCAACTTTTCTTGATGCTTCAAACCTCCAGAATACACTGCATAA  
CGAATTGCTTTATTCCTGCAATTGATAATTTGCATCTTGCTGCAAGAGGAGTGGGTAATATA  
TCAGGGCTTACTTTCAAGAACACTCGTGATGGAAATTCATTGTAGGAGCTGATGATAGTTG  
TTTTCTATAGAGACTATGCTGTCAACTTCACCTTTGTAAATAAAGTCCTTAATAAACTTGGG  
AACAGGACGAGTATCTGTTCCAGAGTTTGGTGGCAGTGTTCTTTAATGAAGCAAAATACAA  
GAGCAGATTGTATCGCTTTAGTGGCATCAACAGTATTTTTTGCAGCAGTATTTGACCTTAAAT  
CAGGAATCACAGTTATTTCAAATATCCTGGCAGCATCAGGGTTATCAGCAATCGAAGAGTAA  
ATCAATGCATCAAGGACTTTTGTTCCTGCAGCTATCAGCCTGTTACATCCCGTGTTGCAGTC  
TTGTACATAAAAACCTTTATTTACCAGGATAGTAAGAGTCATCCTTCAGATCAGCATTTTTT  
ATAAATTTCTCAAGGTGCGACCTAATCGCTTCTTCATCAATTTTAAAACGGCTTTGTTGGTTC  
AAAAAACTCGTTAATTGCTCCTCAGTTTCCAGCACAGTATCCTTTCTATTCACTACTATTTC  
TCTTGTGGATTGATCCTTGCCCTTCTTCCAAGTTAATTTGTGGTGGTATTATCCCAGATTTAA  
TTGGTGCCACATCATTCCCAACCATATCACACTTTGCTTACTTCNCGTGAGCGTCTGAGCGA  
AGATGAAGTGATGGGAAATCAGGAGGCTGAAGTGGAACGGCAAGGCTGAAGCGGCGACG  
GCGAAGAAGAAGATGTCGGGGATTGAAGATGTGATGCGCCGATTTGGGGAATTGAGAATAG  
ATTGAGAATCCTTGTGTTGGTGCCCCAATTTTTCTTCACTTTTTTACTTTTTCTGATTTTTGTAT  
TTTCTCTCCCTCTCCCACCAATCCAGCCGCCTCCCACTGTACTGCTCGACTGGCGGTAATCA  
TCTCACCCCCACACCTTGTATCTTCAGGTGAGCTCCTTTTATGGTGGATTCTTGGGACA  
GAATACTAAGTAAGGGTGAGACTGGTTACCGTCGGTCCAGAGCAGTACAGTGGGAGGC

>Seq34 [organism=Cyrtomium ophiovirus] RNA1 genomic sequence

TTAAATTCTTGTATATTCTACTGTTTCAATTGACAGTGCTGTCAAGATTGTTATGCACATATA  
TTATATTTACAAGGACCATCTCAGAAGATGGAGAAATTAGTCTTCGTAAGTGAATCCTCAA  
AATCATCCCAGTCATCCATCACATCTAGGAAATTTATCTCACCGAGTGCTATCTTTCTTTCTA  
TCTCTTCATTTTCTGTTATCGACTCCTTTGCTGTAAAGAAACCTTCTATTACTTTCTCTTCTGT  
AAAGAAAGATAATTCTCTACTTATAGAGAAATCAATTGACTCAGCTTCTATTTCCCTTGAC  
AAACGAGAAGAAATTGTCTGAACTCTGCCACAATTCAGACAATAGCTTCTCTGCAGTTTGGT  
ACTTATTAATAAGTTCAATGACCTCTTTGAGTCAGGTTAATGCCAGGGTCAAGACCAATA

TGTTCTTTTAGATATTCTGTTACATCTCCTCTCTTGTGGGATATATGTACTCCAGATGATAATC  
GTCTGATTCTATTTATTAATAGCTTATAATTCATTATATTTACTCTATTTGTTTTAGTCTTAAT  
TTGCATTAGATTCCCTAAGCTTTCTAGAATTTAGACCCGATATAGCAATTAACCTTCTCTGT  
TCTTCCTGATTTCCATGCTAAAACCTGCCTGTCTCATAGTAGTATAGAGTGTGTCCATAGTCAA  
CCCAATACCTTTGGTTCTTAATGATTCTATAGATATTTGTTTTACCATTATATCAGATGATATT  
TTACCCTTCCCAGCGAGTGATGCCAACATTCCATATACTTCTTTAGTGTGATCGTTTAACCTC  
ATACCCATAAGTTGCTGCACATATTTGCTCAAATCTTCTGCTGACATATTTTCAAATCCTGTC  
ACCCATCTCGTGGGAAATATCTCTGATTGTTTAAGAGTCACAAGGTATCTTGTGTTTCCAGTT  
GTCATATATTCCTTCAGTATGTCTGAGGCGTAATCATAATTGGAATTTTCCATGGAGTGTTCT  
GATACAATAAATTCAAAGTCAACCGTCGTCAAGCCTTCATATATATTATTTTGATTCTTAAT  
GGATAGGCCATAAGTGTTCTTAAGTCGATCGATGACTTTATACTATCTTTGAGTCCTTGGCTA  
ACAGATATATAATGATCATCTGCTCCGGGAACCAACAATTCTTTCATTATTTGATCGTCTGAT  
ATGAATTCTTCTGTGTGGTCTTTTACTTTATAATGCCTTGTAGGAATTAGTCTTTCTGCTGATT  
TTAGGGTATCAAGATCAAGTAACTTCTGGTATAATATTGATTCCTGAAACCCTGTTTTGTCTC  
TCTCCACTTTGGTTACTTTATGTCTCTTGTACCATTTATATATAGGTAAAGAATCCCAGGAG  
AATTACGCTCAGGAATATACATAATTGCTTCACATTTTGAAATCATCAATATTGTTGCTTCAT  
TTAGATGTTCTGTTATAGTGTTCAATTCTAATAATAATCCTTTTCTTCATTAAGATTAATTCTGA  
GATAGCTTTATTCATAAGCTGTTTCTTTCCTGTGATGTGTGACACATCAAATAACATTACATC  
ATGATCACAATAATCTATGTATGATGAATGTTCAAATGCATTCCAACCTTCTTTTTTCGTTAC  
CATTCCAGCTATTCTATTCACCAGATTATAACCATCATTCTGATATAGAAGTGTGTGATAT  
ATTCATATCTTCCATTGCTACGTGGAAATCACCTCTTCTGCACAAAAATCGACAATTCTATC  
TGATTTCTTGATTTTGTGTGACTTGACTAATATATTCAAATGCCTTTAGCGGATGGATATAC  
ATCAGATTTAGTTGGACTAGAATATTGTAACGGAGTGGCAGCCAGTGAACAAATATATTCCA  
TTGCTTTTATTCTGCTCTTAATGCATTTAAGTCACTAAGATCATGGTAACCTATTGGTACAG  
ATGTGTAATTCACCAATCCATATTCGATCGACCTATCAACAGTGATATAACTGAGATTTTCTT  
TATTGAAATATTCATATAATTTTACTTGTTCAAATATCATGTTGTCAAGTTCATCTGCTAACT  
CTAATGCTGCAAATTCTACTTCATCAATACTGTATGATAATGTAGGAAAAGCATTTAAGA  
ATCTGTGATACTACTTTATCTTTTATATAGAAATGCCCTTGTCTCCTAGATAATGCTCTGAAG  
CACCTAACTGAATTTGACATTGTTGCTTCATGATTTACAGACAACCTTTGCTTATTGAATTCA  
TCTGGTTGGATCACAAATACCAAACCACAGGCTATAATGAATACTCTTAACAATTCATTCCT  
ATAAGACATGGAAAACCCAGCAGTCATCAATTCTCGGGACCACATTCACCATCTTTGTCTT  
TCTTGAATAACTCCTTGAAGATCAAACCTTCGTATTAATGAACCATTACTAGATTCTTTACCCA  
TAACATGGCAAGATGAGTAGAATGTATAGAATCCATCAAAAAAGTCATCAAAGCTAATTCT  
TTCTTTTTAAGCTGAGGAACCATTCCTCCAAATCATTCTTATTGATTATTTACAGGGCTTATT  
ATATTCTGATCCGACATGTATTTATATACTTGCTTATAATTAGATTCCACATTTATTATGTCTA  
AGGATCTGCCCATAGCAAATCCGATGAAATCTTTGGTAGATGTAGCCCCAGCTAGTAAATAC  
TGTGTGTATGATTTATATATCGGTGCAGTATCTATTAATGATGAACTTTCCAATCTAATAGGA  
TGTTGTAAAGCATGTGCTTTTCTGATACCCATCAAGGTGAAAGAAACATCTCTTATCTTATGG  
CATATATCAAGGTTCAATGTCAACCCCTGAGATTCTGTGGCGACACTTTGTTATAACCAAG  
ATAAATCTTGTACTAACCATCAAGTATTGTAAATTCAGGTTATTATCTTCACCACCTAGTGC



ACCATTCAATCTTTCTAACCCAGCCAGTTCATATCTTCCTGTCCAAACCTGTGAAGTAAGATC  
ACCTGTCTTTGGATTGAAGCCACCTGCTGTAGATCTATGGAAATAGCGACCACCAATTGGTG  
CTACTGTGTAAGGTTCTAGATCAGCGTATCGGGCTTCTGTAAATGTGGACAGTGTGCAATCA  
CAAGCGCTGATGAGACAACGTTGCTCCAGATCAGATAGGGTACTGTATTTCACTAGCTCAAA  
TATGAGCCACTTTGTATATCGGGTTATTTTGAATGCCTGAAACACAAGTTTGGACCTGAATA  
ATGATTCTATGCCTAATTCCCTATCAAATTTGGGTGAATTTATAGAAGAAGGAGATGGAGGA  
TTTCGTTTAGGACCATTTTTTGTGATCGTTTCTTTTCTCTCATTATAGGTTCAAACAGTGAGT  
GTAATGAATCAGTATGTACTTGACCTAATAGAGGAACCTCTTCAATTGGTAGAAATATTAAC  
TCTATGCCTTCACCTTTGAGTGATTTAGTATGCATATTCCTGAAACGTATTAGCTCATTATAA  
TTGATTATGTCCTCATTCTTTGTCAACTTTACATTGATATGGTGATTTGATTCCCAGACGTTTT  
GCCAAGTTCTTGCATAATAACCTTTACCTACTATGCTCTTTAGTGTTGCGGATGAATCCACTT  
TAGAAATTATATCTTCTAAAAAAGAGAATACTGATTCTTCATAGAATTTGCTTGCTATTCTAT  
AAGAGAAACAATTAGCAAAGCAATGTACTATTTCTGCCATGAAATTGCTATATCCTTCCTA  
GTTAATGAATTAAGAAATTCTTTGAGTTCATGATTTTTGCACTTATGAGGTAAGGCAGTACTG  
AGCATTTTAGTCAATTGCATTGTAGTATCTTTATAACCACCAGTTAAAGGCACTGGATTCAA  
AATATAAGAACAAGCTTCATCATTGTAATTAATTAATCTAGATAATAGTTTCTTGTTCTCATG  
GTCATGCAAAGATTGAACGTAAGTGATACGTTTGACATTGGATATTGAATAGCCTGAGATAA  
CTGTATCTGGTATATTCGTAAGTGAATATCCATACATACAATGAGGAAGGTAAAAAATGTC  
AGAACCCATTTCAGTATAAGGGGATTTTCTGCATGCAGATGATAAAACAATATTTTCATTATC  
TAAGTCTTTTGGGAATAAGTCCCACATCATTGGATCTTCCACTGTGCTATAATCCATGACTGC  
AATTGATTTTTTGTGCATCATCAATTTATCTGTGCTATGCAGTACCAATCCCTTGATGTGGG  
ATTAACTCTAATTTAAGCTCCTTAAGAACATGCATTATATCCTTGCCCTACTACACAGAGTGT  
TCTAAAATTGCGTATAATGACTTGTAACGGTGATTATCAGATCTTAAACAAGAAGATGTAT  
AACCTGAATCAATGTTTCTGACTAATTCTAAATTGTCATGCCACAAACCACCAGAGTTAGGA  
CTTATAGAAAACATTTTCTTGACGTATTTTCAATAGGTAGATCTTTATAATAGTGATTTTTC  
AACATACTGCACCTTATGTCTGTGATCTGTGTTTGTGATAATTTAATCAACAATCCCATCTTC  
AGCCCACTATCTTGATTCTGTGTATCATTTGATCCATCTTTTCTGTTGTGAAATTAACAACCT  
TGAATGCAGCACATGCATCATCAGAATAGGTTGTGCATATACTTTTCCTTATATTCATATCTA  
TGAACATCAATTCCATCATTAATTGAGATTGTATCCCCATAATGCACCAAGCCAGCCTTCG  
ATGGCACCTGTTTGTCCATGTGAGTAATATATATAGTCAGTATAGGTATTCTCTGAGATAATT  
TTTATATTGTTGAAAACATGTATAACCGCCATGAATTCATTATATTCAGCTGTACCTCGTTCA  
TAGCCATACATGTTGGCTATTATATCCATTATAAAGCTTGATTGTCAGGAGTTTGTGATGTG  
TTATGACCAGAATAATCCAAGAACTACATAAGTATCTTTTTCTCTGAGGAGTGAACTCAT  
ATCATGCATTATCTTCTGTCGCTGATCTTCATTTCATTGTCATCATCTGACCTGGTAATAATTT  
ATAGCCCTTTTAACCATATCCATTACCTTGCTGATTTGAGTCTTATAAGCAAAAGATGCTATA  
CCATAAAATCGAGGATCTTCTTTAAGTTCTTTTTCTTTCTCAACTAATCTCACGATGTCAAAC  
TTTGAGGAGATCGGGACAGATTTTCTATCATAAATGTCACACACCCTATTATTCGTACTACTA  
GTGTAAGGCAATGATTTGGGTAAGACATTCCAGTCTTCACAATCAAAGTAGTACTTTAGTTC  
CTTAACAGAATTATATCCATTTGAATGATAGTCATCAGTCGTACAAGCCTTATCAATGACCC  
GTGAGTGAATATTTCTTCATTACCTATCTCTAACATTTTATTTAGTTTGACATTGAAGTAAA

GATTGTAATCAAACACTAGTTCCTTGTTTATAGTTCCTCCACATACCATGATGTCTAGTTCAT  
ATTCAGTTCGGGTGACAGATTGCTAATGTTTCGGCATAGTCTTGTTCTTTTTGATATAATTAG  
TTATCATCTTCATCTTGAAGAGAGCCGCAAGTCGTTCAATGTGATATTTGTCAACAATTTCT  
TACGGTTAGTCTCTGAGTATATCTTTCCAAACCCCCATTATGATCTACTTGAGCGTATATTA  
ATGATTTGTAGATACTACACATTTTTATGCATGTTTCAGGTTTGCTTTCTTCAGCTATCTTGAA  
CAACTTAGTAGCAAAGTCTTTGTCAATTGATATTGTGTCATAAAGATTATCTAGCAAAGGAA  
GATGTGAACATTTACCTTTAAATCAGCCATGAGTAAGCAGGTTGTTTCATAAAGTGCAGCT  
AATTTGACTCTCTTACTCATGTTATAGTGCAAGTGTACTTCTTGAATATAGTCAATGAATCTT  
ATTTCTTCAGATGAGGCATGATCTCTTATCACATTCAACGTGAAGAAATTGTCCGCCATTGTC  
ATAAGATAATCGATATAACTTCCTGGACCGAATGACACTACACCATCATATTCAATGGCCGA  
AATGGTGCGTGATTTATACACTTTAAACTGCTCTTTACCCACTTCAATCACTGCTAACCCTG  
CCCATAAGATCCTAATGAGATTTTAATTCGTTTTCTTCGTGAAATGCACCAGAATCCTTCAT  
TGTTCTAGTCCATTCTTAATGACATTGCTTGCTAGAGCTTTTACTTTAAAGTTGCATGCTTCA  
AACAAGTCAATTACCCAAGATGCCTTTAAGGTGGTGCTTGATAATTCATTATCTAGCTTTGA  
GTTGTCAGCCTTGTTAGTGTACATCATGAGTAGATTATTATTTTACAACGTTCTAGTGCAGA  
TGCAAATTTCCAGTATTTACTAGATTTTACAGATACCTGAGCCAACGTAGCAGTGTGTTATG  
CATTGTTATAAGAGATTTCATAGATGAAGTGTATTCAAGATCTCGATTAGAAAAATATGACC  
TGAATAAATGCAAATCCAGCTGCCAGTTTTAGACCATTTTTTCAGGATACATTGAACTATTA  
AGGAAAAAGTCCTGGTTCTCTTTGAAAAATGTAACAAAAGGGAAATCCAACCTCACGATTGG  
TTCAGGTGGAAGTTGCTTTGTTGGTCTAATATGTTCAATGGAAGGAATTAAGTATTTGAACTC  
TTGCTTAAAAGACAATTTTGGTCTCGGTGGTTCAAATTTGCTCTCTTCTTTCCGTGAATGCAT  
CAGATTCATATGAGATGTTTGTAGGCGCTCACATAATTCATACAAATACGGATATTCAGCTT  
CGGACAATCCGAGTGAATGGATGTAATTATAAAATGGCACAAATCGATCTTTATCTTCTGTC  
TTTCTGTCAGGTTTCATCAGCGACTTGCTCGATGTCCGATAAGTCCGTATCATCGTTTGTCTTT  
CGTTCATCTTCCGAGCTTTTCGGTTGTGTCTGTGTACCAACTTCCACTATCTTCACTTTCATCAG  
TATCACTTGATCCATCCATCACTTCATCCTGATCATCAGGAGGAATTTTCTCTTTCCATATGG  
GAAGATCTAATACATCTTCATCGGTTATATCAGCCCAAGATATCTCTGACTTGTAATCCATGG  
TGATGATCACCATTTTGTTTAAACACTAGTTATGCAAATGTGTTAAATCAACCCATAGATG  
AAATTATGGTCAATATCGTGGCAAAGCCAATAGTCATCTGGTAAATCATTGATCAGCAAT  
GATTCTAATTAATAAGGACGCAAATCCTTTCCAATGATTCTCCATTGATCAATGTGGTCTGT  
AGATTCTGTAACATAAAGTATATGATTCCGCTTAGCATCGGTTTTATGATGTGCCATATATGT  
GTATCCATTATGACGAATCCCAGTGGTTGACTTGACAAATGCAGCATAGAATCTGGATTGT  
CATAATCTATAACGCCTGTATTACGTTGACTCAATTGTCTGAAGTACATGTTACTATCACAAA  
TTTGCAGTTTATT

>Seq35 [organism=Cyrtomium ophiiovirus] RNA2 genomic sequence

GAAATGACATCATCCAATTCAGCAGGTCAGTTCTTGGGATCCTTGTACTTATTTTCATATATAG  
TAGAATCCTCACATGAACTCGACTTGACAATATAAATTTTCAGATTTATCATCGTAATTTATAT  
CAGAGCAGACCATGATCGGAAAATTATCTATATCCATTATAATTTTGCAAGTGGAGTCTTCG  
GTGAATAGTATCTGAGTCATGTTTCATGTTCAAATTTATTTAAAACAAGTTACGAAATATAGA  
AGACTTACATCCATAATTATTAGTACCCAATCATGTTGATTATTTCAAATAACTTATTATCAT

TAATGAAACTTCTTACTACTAATTGATCATCTTTCTTGAGTATCCATTCATGACCTATAAACT  
TTGATGAGTCAATGTTATTATGGATTAATAATCTCGATAATGATATTATATTCACATTAATGT  
CATGAGTAACAAATACATCCTTAAGCATTATTGCTGATTGTTTGTATTCAACTAAGTATTCTG  
GGTATAGATGCCCCCTTCACTTTACCATTGATGGTGTCAAACCTTTGATCCGTTAATCCATTTG  
GAGCATATACCAAATGATGTGATGCCCCAGAATCAATGAACCACTTGCCTATCATACTATCA  
ACAACACGATCAAGTGTCAATAATACAAATCCTTGAGTCTTAGAGCTATCACCTTGGTTTC  
AACTTGTTTAACTTACATGTATCCATACGTTTTTCTCTATTTTCTTCAATGTTACGAATCATA  
TTCATGGATTTTGTAAACATCAATCTTTTCCGATGATCTTAGCTGTTCAAGTATATTCTTGTTTT  
TCATGTGTTTAGCAGGCTCAAAATTCGCAATGTAGATACTCTGAATAGCAATGTCTTTGAAG  
AGTTTAGGTGTTCTTAAAGTTTCAATATGGGCAGTTACGTATAAGACCCCCAAATTCTCCTTCC  
TTTAACGACACATTAGCCACTGTCTTTATCTTTATCTGAGAAAAGTCTTTTCTCGTGACACAG  
TATGACATCGTGAAAATGTGAAGAGACATCATGTTGATGCGCATGAGATTTCTGAATAAC  
AGATTCTGATCTTTTCATGCGATTGTCACTCATTGTTATAATTAGTTCATCAGTCTTGTTGTTG  
GTAATATACAAAGGCACAAACAACATCTCTAATTGAGCAATTTTCACAAAAGGCGGGGTAT  
TTTCAACTTCATAAAGATTTTATCTATACGGTCATAAAGGCTAGGAAGTGAATATTCATAA  
CTTTGTTATTGGCTTTCACAGGAAATGTCAATGGAATTCCAATTGTATGGATACCTGGATTTG  
TGAAGTTTCTTAAATCACATGTAATGTCTCGCAGTCCATCTTCTAAATCACCTGGACCTTCGT  
AATTAATCAGCATCTCATCATTGATATCTTCAAGAAGTGGATCTGCACTAATAGCATGTTGC  
GTTACAGCTCTCCTTGAATTCACAGAATTTGCTCTGATGAGACTTAGATTTTCCATGCTGTAG  
CTAGTATCGCTGTTTTCAAGAATTTCAGTTTCTAATAACTGATCGATTATTAATATAAACCT  
TAATTATGCTTACCCTTGCAATTGCCACTGTACTCGGCGATATGGAGAGCTTTCCTCAAAAACA  
AACAGTGACGTACTGAACCGTAAGGACGGAACCTCTTCTGTCACTCGCCATTGTTTTTATTTA  
AAACAAGACAAGAAGACAATGTAACCATTGACCTTATTCAGATCTACCATCACTATCATA  
ACCACAATAGTGATACTCAGACCCACTCCCGATGACTTCATCTATACGACGGAATGACCAAG  
CTATAGGTTCTGATTCAACAAAGAGCTTGTTGTTAATCAGAGACACATGGTTACCTTCTTCAA  
ATAATTTATATCTCTTATCA

>Seq36 [organism=Cyrtomium ophiiovirus] RNA3 genomic sequence

ATTACCAGGATTAATAATTAACCTTTGAAGTCTTTGCCAGCTGAGTTGGGGTCGATAAAAC  
TTACCATCTGATTTATTTAAACAGATGCACTTAGTGCTCATAAAACAGGAAGACAGCAGTC  
ATTTCTTACCAGAAGCAGACACGATCTCTTTAATCAATTCAACTGACAAAGAGGTAAAATCA  
TAATCACGATTCTGGAGAGAAGGCCAAGTACGATTACCAGGGTCCAGAGGATTATCCATCCC  
AACCAAAATTTTCATCCATCAAGAAGGAGTTCAACTTTTTGTTAGTCACAAGCTCATATAATT  
GTTTACGTCCCTTCTCAGTCAAACAATATATAAGTGCATTAGTTGCCTTTGCAGTGAATCGTT  
GAGGAATTTTCTATCCATGTTCAACGGATGGAATTTAAGGAGTATATCAAAATCGCCAGAT  
TTTCCTTTCAATAAGTCCCGAATCTCTAGCGCCATTTTCAGCTTTTCTTTCTTTGAAATCTT  
CCTCAGACATTTTATCTTCACTCTTCTTGGGAACTTTGGTATCTAGTCCAGCTGTCAAATCTG  
CATAACGGAGGACTTTACTCCCAGCCACGGTTAAACGAATACGTGCATAATACTTGTGAGGA  
ATATGATTCTTTAACTCCAATTTTAGGAGGATATGAGCTGGGAATTTTCTACAAGGAGCAGA  
TGAGAGGGCATCAGCAAGGTCCTCTCATTATTTATAGTAGTATCATTCAATAGAGTATTG  
CTACAAGCCCTTGCAACTTTCTTCCTTCACTTTCTTTATTTTTAGACGGAAGAAAACACGAT

TAAAGATCATACAAAGTCCTGCAATGAATATGTTGCGACTGACTGTAAGTGCAACTGCGCCT  
TCACTCATGCGTATGCTATTCAACCTTGTTATTGTAAACATGAATTGTGCATCCTCACGATCA  
TGGTAGAGGGGCATAAAGGATTGCATCAAGAACACGAGTACCTGATATGATAAGATTTGTTA  
CATTGATAGGCGCATTCTTCACTAACTGAATTTCAACCTCCCCAGGCAAATATGTATCATTTA  
CCGGTATAGTCTTAACAAATTCAGACACAATACGTGACAATCCTTCTTCATCATGAGAAAAA  
GTAGCAGATTTGAATCGCTCCTCAAATTCTGCACCAACAACCATAATTGGTTTTCTAGATGTT  
CCACTGCTTTCTGCTTCATCCTCTTGTTCTTCTTTCTTGTCGGCGTCTTTCATCCCCATTTGA  
TCCTTTACTATCATCATCTGAATGTTCTTCATCAACCTCTTTCTTTCTTCTTTGGCTTCTCTT  
CTTCTTTCTTTTCTTCTGATTCATGACTTGATGAGTCCTTGGCATCTCCTTTATTCTTTTTA  
GGAGGACTCTGAGATCTTGCTTTCATTATTTTCAGTTCCCCCGTCAGTAACTGTGAATGATGTA  
TCAGGATGAGTGTCTCGATTTGATTTGATGAATTCCATCACATGTTTAACGAGACCCCCATTT  
GACGCGATAAAGCCCCATTCGCGCAACAGAGCCGCTTCTTTCTCACTCGCTGACCATCATT  
GAAATTCGCGATCATGGAACGCAGAGACTTCAGAGAACCAGCAGCAGATTGAGACATCTTG  
ACTACAAGATAACAAGATAACAAGCACGGATAACGAACTCCGATGATATAACTCGATAGCA  
AAGAATTTCAAGTTCTTAGTAACTGATCCGGCCCCATTCGCGCAACAGAGCCGCTTCTTT

>Seq37 [organism=Datura ophiiovirus] RNA1 genomic sequence

GTCAAACATGGCTTTTAAATTTTTGGCTGCACTTTGTGCTCTGTGCAATGAGCAAATGACTAC  
ATCAAGACCCCATTAATAAAAAGGAAAGAACAATCAAAAGACATAAGAAAAAGCAAATTG  
CTCATCTTAATCAATCATAGCAATAATCATCATCTTCCTCAAATTCATCTGATGTTTTGCTTAT  
TTTTATCATCTCCTCAAGTGCATATTCCTATTAATTTTCATATTCTTCAACTGTGGTTCCTATT  
AATGATTGAGTTAATTCTGTCAATAATGAACTTTTGTCTTCTATCTTCTCAGAAAATGATTCT  
TCTTCTTTATTATTTTTCACACTACTTACTAAGACATCAAATAGCTCATTCTTCGATGATTTTT  
CAAAAAATTCCGAGACAGATTTAAACTCTCTATAAACCTTTTCAATTCCAGCTCCTCGATTG  
TGTTAGAATTCATTCAAATGTATTACTATCAGTTAAAGATTATTGCAAGTCACTGAAAGA  
GCCATATCGTGGTGTATTCTCCTCAATCTGTTAATTATCAGTTTATAATTCAAACAATCATAT  
CTCTTATTCTTTGACTTATTTTTGACTAATTCATTAAAGTTGAGCTTTTTAATGCCAGATGTTT  
CTTTAATCCATCAAGTATTCTTCCTGATTTATACGCTCTGACTGCTAAATTTGCAATCCTATA  
AATCCTAGTCATATTGTCTGTGCCATCCAATTTTCATCTTTGATATGTTAAATGACTTTATAATT  
GTGTCAGAAATTAACAGTATTTCGATCTCACTGAAGCCTCATAAATGAATTTCCACGCCAT  
TCTGCTGGATTCTTTTATTCTTGAATTGGCTATTGCTTCCACTAATCTGAAAAATTCATGTTCC  
TCTAAATTTTCAAATCCTGTTAAGAATTCTGTATTGCCAAAGAATTGCAAGTAATGTGGCAG  
TACTATCTCTTCATCTCCTCTTTTAGACTTGACAAGTATTCTTTTTCTGGATTTTCTTCACAA  
GATCCAGAGTAAATTATACGGGGTTTCCATGTTTTAGTTTTACCCTATAAAAAATCTTCTTTT  
TCTATATTGTTTGATAACAATGAGCACGGCACAATCAACAACCTCCTCTAATCCGTTTTCGTCT  
TCCATTATTTTATCAAGAGATTTAGGAACTTCTACAAAATCTGGACAATGCTCTATGAGCATT  
TCAGATAGCCTTTTCGTCGGATATTGCTTCTTCTGTGTGATCTTTCACACGTTTCGATCCCTTTGT  
TGAATAATGATGTATCTTTAATTCCATGATCCCCTTAGTCATAATTTCTGAAATTATAGAAT  
CTTTAAACTCTTTCTTTTAAATTTTTCTTGATCAAGTTCTTTGATTTCTTCTTTTCCATTTATA  
GTTAAGTAAATGTAACCTGGCGATTCTATAGAAGGCATCACTATCCTCATTCTTTATCCTTG  
ACAATATTTATAAATTCTTCACCCAAATATTTTCATTATTGAGTTCAACCTCAATATGATCTTT

CTTTCAAACACTATTAAATCATTAAATCATTTTCATTAAATTTTCTTTTGTGCTGCTGTAATGAG  
AAATATCTAACAGATAAACGTCGTGGTCTAAATACTTTGAATAAAAACTTTTTCTGTCACAT  
CCACTTTAGCTTTCCTTCTGTCATGCCTCTTATTCTATTTATTAAATTGAAACCATCATTTCT  
TGAGACAGATCTATGTTGTATTTTTAACTCATTCACTGCTAAATGTGAATCACCTCTCCCAGC  
GAACAGATCTATTACTTTGTCATTCTCCTTTATGAATCCTGATGATTTCAACAGAGCTAGCAG  
AGATATCATTGAAGGATATACATCTGATAAAGTAGGTGATGAAACATTCTTTGGTTTACAAT  
TCATGCTGCATATCATCTCAAACTCTTTACAGCTGATTTCAACATTTTAGTGTCTTCAAACCT  
CCTCCTTCCTGAATGGTAAAGATGAATAATAAACTACACCTACTTCGTGGTCAAAATCAGCC  
TTCACATATGATTTAATCTCTTCAGAATAATAATTGTTCAATTGATATTGTCTAAATTCTTTCC  
CATTTAATTCTTGATGGATTGACTTTGCACATGTGATGAGTTCAGGCACAGTAAAACCTGCT  
GAAGGAAGAGCCATTAGCAACATTTTAGATATTCTTTTATCACGAATATGTAGGTGAGCTTT  
GTCAGCTTTGATTTCGTTTTAAATTTGTTATTGAATTTGAGACGGTCTTTTCCTCATTTATTTGC  
AATATGAAACTACAACCTTTGATGTGTGTTAACCTATATGACAAAGATGTTGCTACTATAAA  
TAATCTCATTAAGATTTCTCTATACTCTAGAGAATAGCCTTGCCTTATTATTTCTGATGACCA  
GACTTTACCAGTGGACTTCGTTCTTTTAAATAACTCATCATACAACAAGCTTCTGATAACACT  
CCTAGTTGGAGTCTCATTTTCTATTATATTCAAGCTTGTATAGAATTTGTAAAATTCATCAAA  
ATAATGATCTTTATTAGTGAAATCCCTGATTTCTGGTGCTATTTTTTCTAGTATATCCATTGGG  
ATCAACTCAGGGGATATTATGCATTGATCTATCATGTATTTATGCACTGATCTGAAAGAGTTT  
TGCTCATCATCAATTCGTGAGGCACCGCTGCTGATTATTTATAAAATGTCCTTCGAGTTCT  
TCACCTGTGATAAAAAATAAGAGAGGTTCTTATATATTTTACTTTTGGATTTTATTTTATGT  
AAATTGTTGATCTTTTCTCCTTTGTTATAAAAAGTTTATTATTAATTCTGCGGGTTTCAACTTTA  
GGTTAAATGAAACCTCCTTTATAAAGGGCCATATGTCAGAACAAATTGTTACTAATTTGCTTT  
CATGATTCTTTATGTTACAATAAGATACTATGCTCTTGATTACTAAAATTAAATATTGTATAT  
TAATATTGTTGTCTTCACCACCTGTTAGATCAATTAATTTGTCTATCCCAGCCACTTCAACCA  
GATTGGTTCCTTCGTTTGAAGACAAGTCTCCTGTTCTTTCTCTGAAACCAGAACTTTTTGCTCT  
GTGAAAATATCTTCCTCCTCTTGGGGAAACAACATGTTCAAGTTAAGTCGTTGAACTTTGCATC  
TGAAAAAGTGCTCAGTGTCAAATCACATATGGCTTTTAAATGAATCAGCAGTATTATTGCTGA  
GCTCAGAGTATTTCTCTAATTCCATCATAATCCACTTTGTATATCTGACTAGTTCATAGGCCA  
TGAATATCAATTTATTTTGAACATTCCTTCTATTTCTAAGTCTCTATCAAACCTTTGCTGAGTT  
GATATATGTTTTATAGGTGGACTCTTATTTTTGCCTCTGTTATTATTGCTAGTTCGACTTATA  
GCTCTCAATTGCCCGTTTACTTCATCTACTTCCAATTTGCCAAGAATAGGTATCTCTTCAATA  
TCTAAGAAATCAATGATCAACTCTTTTTCTTCTGCACCTAATTTGTATGTCTTTCTCAAATTGT  
TTCTTGCTTCTATGAGTGATTTATAACCTAAAGAACGTGGTGACCCCCAATTAATGTTTGTTT  
GGTATTCGTAATTTATCATATGATTCTTTGTCCACGCCTGATTCCACAATTTGTTTCATCTTATA  
TTTGCCTAGGACGAATGAAAAATGTGGTGGAATTGTCTATCTTTGAATAGATGTTTTCAAAGA  
AACAAAAAATAGAAGATTCATAAACTTGCTACTATTCTGTATGAAAAGCTTTTCTTGAAA  
CTTGTTACTAATTCTGCTTTATATTTTTCTTCGTCAATTTGTTTTGTAGCTTCGAATATAGCCA  
GCAACTCTTCATTTTCTATTTTTTGTCTAAATTTTCTTCAAAAAATCTTTTAACAATGTCCC  
TGTGTCAAATCTTCCTCCCGATAACGGCAGTGGGTCTGTAATATACTGATAAGCATTAGTGG  
AAAGCCTAATTAGAGAATAAAATCTTACTTTGTCCATTGGATTTGCTATTATACTATCAATAA

ATGCTATTCTCTTGACACTAGAAATGGAGTAACCTGAAAGGGAAGCATCGATAATAGGAGT  
ACACGCAAATCCAAACATTGCATAAGGAGCATAACATCAGAATTAAAGTATTAGATAATACTT  
TTATATCATCTTTGTGAAACAAATAAAAACCATTTATCACATCTTCTTCATCTGGAACCTCCT  
TGCATGTCAATCCTTCAGATTCCCTGGAGAATGTTGATGGCTTCTTTTAAGCTATCTAACTCTA  
GTTTTGCAGATTGCTTTATAGCTGATTCGAGCAATTTTTGTCTAGGATCTTTCTCAAGTCCAA  
AAAAATCAACAAATCTCATTATTTCTTTTTTCAACAACATTGTAAATTTATAATTCCTTAATA  
TGGTCTGGACTTTGTGATGACTGGATCGTGCACAAGATGATGTATATCCACTGTCTATTATTT  
TTATCTGTTCTAATTCACTCTCCCATATGTATGATGAATTAGGGGAAATACCCATCATTCTTT  
TATAATTATTTTCTATGGGTGTATCCTTGAAATAATGATTTTTTAGCATAGAACATCTTCCAT  
TTGTCACCTTGTTGTGATAGTTTTACTAGCAATCCCATTCTTCTTGAATATGTTTTTAAGTG  
CAATATAATGTCATTTAATTTTTCTTGTGTCATTGATTCTTCTATAAATACACCACATGAATC  
ATCACTGTAGGTTGTGCACTTAAATGAAGAAAATTTTAAGTCTCTTAGCATGTCTTCCATCAT  
CAATTGAGATTGAATTCCCATAGAGGACCAACCACCCTTCTATTGCTCCCTTTTGATGTTT  
AGAGTAATAGACATTGTCTGAATACAAATTCTCAAAAATGACTTCCATTGTATTGAAAATAT  
CAAGAACTTGGGTCACATGCCTCCTTTCTTCACCTTCAAAACCATACATATCACAGATTTCTT  
CTAAAATAAATAGATTATTTTCTGGCCGTTGTGAAGTGTTATGTCCTGAGTAGTCTAGAAAA  
ATGGAATAAGAATCCTTTTCTTCCAACATCATTGACATTTTCATACATCACATTGCGTCTCTGG  
TCTTCGGTCATGGTCATCATCTGGCCTGGTATCAACTTCATTGCTCTCTTGACAAGTTCCATA  
ATAGTGGATATGTACAATTTGATCTTAAAAGAGGCTACTCCGTAGAACCTAGCAGCTGTTTT  
TAATCTTTTTTCTTCTCAACTAATCTAACGATAGTGTATTTTTTCATCTTTGTAAACTTTGG  
TCTTTACGATCGACAATCTTGGTTAACCTTTGAGCTGTTGTTGAATTTTCAATCTTTACATTTT  
TTACCAGTTCAGTAAGGTTATTGTTCTTAATGAAATAAATTAATTCTTTGACTGAATTGCCAG  
ATGAGTCATACTCATCCTTAGTACAAGCTTTGTCAATTATTCTTGAAATGATATTAGTTTCTT  
GGCCCAGCTCAAGCATCTTCCCTAATCTTACACCCCTATAATTATTTTCATTAAATGTTATTT  
CTTTTGAGTAACCTCCTCCTGCTGCCATTAAGGACAATTCTTGCACCAAGTCATCTGGACAAC  
AAAGTAATTTAGGTACTATTCCATATTTTTTGATATATGTAGTTATAAATTTTCAATTTTGAACA  
TGCTCTCTCAAGTGTTCTACCAAATATGGGTCAACATCGTGGTTTCTATTTGTTCTTTGAGTGT  
ATTTTCGACAGACCTTTATTTTCATCAACTTCTGCATAAACTATCGTTTTGCAAATGGATGACA  
TCTTTATACACATTTGAGGTTTCAGACATCATGCATATTTCTACAAGTTTTTTGGTTTTATAAG  
GAGATTCTAATGTTGAGTCATATAGATTATCAAGTAAGGGCAAGATTGAAGAATTCATTTTG  
TAGTCAGCCATCAATAAACAAGTTGTCTCGTAGAATGCCGTCATGTTTGTCTCTTAGGATTT  
TTAAGCTCCAACAATGATTTACGTACATTATGAAGTCTTGTTCTCTTTCCCTTTCATTTTGTT  
CTAGGTCATAGTTCAATTCACCTATCCAGTCTAGTGTGTTAGAATTTTCTGCAACCGTTAACA  
AATAATTCAACATATTTCCATCACCAACCAAGATTTGTTTGTCAATAAATCGATGTAATTG  
TGCTGGACACAAATATGTAAATCTCTTCTATTTGTGTTTCTTTCCCAACATCTTTGTGACTAC  
GTATTTCTAATTTTGTTACAGAACTTCCGTCTTTATTTGAAGTTGTGTTGATCCTTCTATTTTC  
ATGAAAATTTACTGAAATTGATGAATCCTTCTTTTTGTTTAATTTGGAATAAGATATTTTAT  
TTTCAAATTGATTGTTTCAAGCACAGACAAAATCCAAGAATTTTAAGTGTGTTCAATTTTGGG  
TTCTACTTTGAAATTGTTTTTAAAAGGGTAATTACCAGTTGTTCTATCACCTGTCATCATATTT  
CTCATTTTTGATGCTTCATAATTCTCTAAGTTAGAAGCAAAATTGATGAAAGTCGTGTAATGT

GGAGATGCGTGAGCAACTTCTCTCATCTTTAAGTAAAACCTCAATAATTGAGTCCTGACTGGA  
CATAATCCTTTTCGCATCCTCACCAAATTCTGATACAAATCTTCTAAATTGCATTAGGTCTAT  
CTTATTCTTTGTGTTGAATTTTTTCAGGATACAATTTTGAAGTACACAAACAATTGAAGGTTTCT  
TTCTGAAAAACTTCTGTACGGAGAACATATTTTTGAGATTAATGTGGGTTTATCCACATAATC  
TTTTTCCCTCTGGCTCGGTATCCATTCTACTAAATGATTGAATTTTTGTTCAAAACCCACATCT  
GTCAAGTCAGGTTTCTTTCTTTTCGGTTGCTCTGCTTTCTAGCATTTGAAATAGTTCATCAA  
AGTTTTCCACGAATATTTTGTAAGATGTGAGTCTTCCATCCTGTACTGTTTCATTTTGTTGA  
ACAATTCAAGTACAGATTTTTCTGTGCTCGTCGTTTATCTGATATTGATTTTCATAGATATCC  
ATCTATCCACATAGTATTTGTCTTGCAGAAGTGATTCTTCTATGTCAGCCCAAATCATTTTTG  
GAGCAGTCATGTTTTGTGGTCGTTAGAAAAGTACGGTGTTATTTTCATTAAAGCGATTTTAT  
GAAACTGAATCAATTGAAAATGCAAGTTTAATTTTATTCTCATTACAACAATGTAATGAAT  
TGATTTATTGATCTCGATTTGAGAAGGACTCAATTTAATAAGACTTGATAAATACGGAGAAT  
TGAATGAGGCTAAGGATAATTTGCAACAGCTCAAAGTTGATATTAATTTAAAATAAATTGAA  
AAGAAGATGAAATTTAGCTTAATTTTCGGTCATTAAGCTAATCTATGGTGATAGAAGTAAGAC  
AATCAAAGTATTCAGATTCTTGACTGCTTGTGTCATCTTCTTCACGCTCAATTTCAACTATTG  
AATTTCCACTAATGCAAAATTCTTCCTTATTTGATGTCATCTTGTGAAATATTGATTCTGTCTT  
TCTTAATATTTTCGCAATGAGACTTCTTCCTAAAGAAGTCTTTCTCATAACCTGAAAAAGAATT  
GTCGAATAGTTTAAACAAAATGCTATCTTTATCTCTACAACCTATGAATATGGCATCACAGCT  
TAAATTTGGAGAAAGTTCATTGATTATTAGATCATCAAGAGAATTGCACAGGAATATTTACAC  
ATTTTTCAATGACAAATGATGTGAAGAATGGTTCTGAGTTTGAGTAAACAACGTAGGCTTTC  
ATCCTTACATCCATTACTTGTTTAGTTTCATCTGGTATTAAGTTGCTGATGATTTGATGACCC  
ATCACTCCTTTGTCACTCCAGTCTTCTTTTGACAAGAAGCTATTTTCTACGATTCTGAATGATT  
CAAAGATCATTTTATCATTTAAGACCCCCATTCTTTCAAGTTCCTGTTTAGCTATTCGTGAGT  
TTACTCTTGTTAACTTGCAAGCCATGATTTTAAATATCAAATATCGATT

>Seq38 [organism=Datura ophiiovirus] RNA2 genomic sequence

ATACGTAGACTGATCTTTTCGATAATTTTAAATCGATTGTATATAATACAATTTGCGTGTGTGC  
TACACGGCTTTTAGAATTTGGGTGCATGCCAGTTAAAGTCTGCATACTCGACTGGAACCTAT  
TAAGATTCACATATCTTTTATTTAAACGATACTTGTTCAACCCCAAATTACATGATGCTAAAT  
ATTTCAACAACACTACTCATACTTATGCTTCATTAATTCATACTAAAAGTACTTCGTTTTAACTT  
AATAATACTACCATAATCCAACACTTATCAGAGTTTATCATTGTTGTAATACTCTGTCTGCAGC  
TTCAACAGCATAGCAGAGACCCCTTCAAATTCATGACTATATTTCAACTTATAATTATTGAG  
AAAATCAGAAACAAACTCTTTTGAAACAAAGTAATTTTCATCCTGGATCCACATCCTACCAG  
ATTCGTTTTTCATCACATTTTAAAGATAATCTTATTATCCAACATTAGATAACAAGTGCCATCCT  
CAGATTTTCATTCTATTAATCACACCATCTTCCTTCAGTTTAGAATAAGAACTATGTTTTCT  
TCATACATTGTTTCATTGAATAAACCACAATTTTTTCATTGAAATTTCTCTCTCATGATATTTGTA  
AAGAATTGTTCTTCTTCTATCATCAGCTTTTCAACGCCTCCACAATAATCAATTGATTTATT  
AGGCATAGCATCACCATGAAAGAAAAGATGAGTGTGCGATGCAGTGTCTAAACAAGTCAAC  
CTCTTATCTCCTTCAGGTCTCTCAAATGTTCTGCTACTTTTAGTGAACATAGCATTCTTATTAT  
TTTGTTTCACTGACATCAATTCAGATATGCTTTTCTGCCAGCATCAATGATGTTATTAATGT  
TGCTATCATCAGAACTTGATGATTCCTGGATGTATTCTATTTTTTTGCAATTCCTTCTTCTCTC

TCGTGCCCTTAATGTTTCCAATCTTCTAAACTCTTTCTTTTTCTCCTCAAGTTCTTTCTTCACAT  
CCGAAGTGAATTTAGAGAACATTGTTTTTTGATTTATGTCCTTGGGTTTCATCATCGGGTCAA  
GATATATCAATTTAGGTACACCTTTCTTTGTCTTTATGGGTATTTCTCTTCATGAGTGAAAA  
AGAACATGTTAATCGCACCATATGATCTGCCCTCTATAGGGATGCTTTCAACCGCCATCTTCA  
CGAGAATGTTGTTTAGGTCTTTTGACGCAACGAAGAAGTCCATTGAGAGTTCTATTAAAGCC  
ATCTCATGACTTTCAAAGCTCACTTTTTCAATCACAGGATCCAGTCCAGCGTTTTCTTTACCC  
ATGTCTTCAAGAGATATAGTTATCACACCAGATTGACCATCACTCTCATTTCTTTGAAATAAT  
GGTATGTAGAGAATCTGAACTTTTTCGAACCGCACAAAGTTTCTACTCGGCATCACTTTGTTG  
AAGAGACTTTTCAAACCACCAATCACAAGTCTTTTGGTGTGTTCTCTTTCTTCAATTTCATA  
GTGATGGAAGATACAGCTGTTTTGATTATGCCTTTTTGCACATTAGCGTAGTCCATGATAACA  
TCTTCTATAGATGGATCAATCTCAGTCATATCAGAACTTAGGTGTATTATGTTCAATTTTACCA  
TTGTAGAACCCTTCATTGAGCATATCTGACGCATGAGCTCGAGATATGCAGACTTCTTTTCT  
CTCCTTGAAATTTGCCTATCCATAGAGTCACAATTCCTGACAGATATTGCTCTGATTACAGAT  
TACAAATACGTAGACTGATCTTTC

>Seq39 [organism=Datura ophiiovirus] RNA3 genomic sequence

TGTGCTGGTTGTGACCCTTTATTTAAAACGAAAGGACACGTAATCTGTAGATCACAAACATG  
CGCGCCACAACCTTATTTATTCAAAGATCCCTTTTAGCATAGCAACAGACATGTCGCTGTAGT  
CTGCAGTGTTCATCATTAAGAAGTTCGTGAACAACCTTTATTGCCATGTGTTTCACCGAAAAA  
TCTTTATCTCGCATAAAACCAGAGTTGTTGTGCGAAAGTATCTTTTTATGAAGATCCTTTCGT  
CCTTCTACACTGAGCGTCTCAAGTATCGCTCTGGTGAGTTTTTTTCGTGAAGTTTTGAACTACT  
GGCCTTTTCGGATGAAGAGGATGCATTTTGATTTGTTTTTGACATCTCCTTGTAAGACTTT  
ATGTACTCGACAAGGTTGGATGCATGTTCCAATCTTTTGTTTCGATCCATTATCATCATCAAA  
ACTTCTGCTGAGTCATTTTTAGTTGGTTTCAGGGGCTCTGCCTTACGGAACCCAGATGCACAT  
ACAGCGTATCTAACTGCTCTGTTGCCTGCTATAGCCAATTTGCATCTTGATGCAATTGCCACG  
GGAAGTATGTTCAAGTCAATATTGAGGAAGACATTCTGAGGAAATTTCTCGTGCTGGTGCG  
TGAAAGGTCTCCTGCTATGCTGCCCATTGTCACTCTGTTGGAATTGTAAACATAATCTTTGAT  
GAACTTCGGCACAGTTTTATTCTCAGCAGCATTCGGCAATGATCCTTGTAACATAAACCAAGA  
TCATTCCGGCAAGCAATGCTTGTTTGCCAAGCATTATATTTCTGCTCACATCAGTCGAAGTCA  
ACTTTTCTATTTTCATCATTTCTGAAGATTCCAAGTGGTTCTTTGTGAGGCTCAATCATAGAGC  
AAAACACAATTGCATCAAGAATCTTCGTGCCTGCTCCACCAATTCAGAAACACTGCAATCA  
GGGCTCTTATAGTCTGTATCCTTGAAATATTTGATCACTAAGTCATTCTCCTGATAAGTTTCA  
GATTGAGTGCCGATAGTCTTGATGAACTTCTCAAGATGCTCTTGAATTCCTTTAGCATCAACA  
ATGAACGATGATTTTTCCAGAGCTTTCTCAAATTCATCATGATTTGTTATTTTCATTTCTTCTT  
TGTCCTCAAGATCTTCAAATGACTCAGAACCTTCTTCTTCTGATTATCATCTTTTCAGAGTTTT  
TTCTGGTTCTGTCACCTTCTTTGCTTGTTGGCCCTTGCTTGAAGAACCAGTCTTCCTCAGTTCA  
GCCAGAACTGTCAGCATCTTCACCTAGAGAGAGTTGAAGATGGCTTTGTTCTTTTGACAG  
AATCCTACCTGTAAGAACACTTTTCCTACTTGGGGCTGAAGTGGTTTTTGTTCAATTTGTTGT  
CTTTGCTCATACGGACAAATCTGACCATCAATCACAGAAAACATCTTTTTGTGATCTAGACA  
TTTCTTCAGACGGAACATGTTAGTTGTTATTTGTTTACAGTTGGGACCTATTCCTGCAGCATC  
GAGTAATGCTTCTTCTCAGGTGTAGGTGTGGCACCTTGTTGTTTACCCTGTGAGCAAGGGG



GAATATTTCTCAGGATTGAAAACCTCTGTCTTTTCCAGCCATTATGGTTAAACGTAATCTCGG  
TTCGTAATTTGTCTGAATTACAGATTTTGAGTGGCAGATCACAGACAGCAGTGCATGCTCATA  
CGGAC

>Seq40 [organism=Epifagus ophiovirus] RNA3 partial sequence

AGCAACCATCTTACATCATATGATAGCCTAACATCCATAAATGGCAAACCTGAGTGGGATTA  
CGCTTCCGAGTTTCTACACGCCTGCGATTTCTTCCCCAAACGGAACCACAATACACAATGAA  
AATGGAAACAAGGTACACGACGACACGGAGTCCCAATTTTTCTTCCTTCTTTGATTAGGGCG  
GACGGAAGTTCTACCTTCTTCAAACAGCGGACGGAGAAGAAGCACGTCGTCTAAAAAAGAG  
AGAGGAGGGATATGGACTATAAACTAATATACCCAATTTTTTATTTAAAGCGAAATGCAATA  
CACTAATGAACCATGAAACGCAGGCAATAGAGGTTTTCTTAATTTAATACATAATGATTCA  
GCAGCACATTTTTAGGTCACCTTATAGATCTCCTTCAATTGACTCACTGTGATATCATTATAG  
TCTGCATCATCTCTTCCTANAAATTGGCCAAACCCTCTCCTCGTGTTGCGCTCAATCACACCA  
TAAAAGTTTACATCATTTCTTAAACGCTTTCACATTATCAGTATCCACTTTCAATATCATCGAC  
TTTCTACCTTCTGAGCTTAACGATTCCAAAACCTGCCCTTGTGAGTTTAAGAGTCAAATTCTCG  
ATTGTCGGCTTCTCAGGAGGACAAAGCGGGTGCATATTGATCTGAGCAGCACAGTTTCCTTT  
TAAACTTCTCAGAAATTCTGCTATTTCTTGTCTTTTCATTTTATCATTACCAACATGATCA  
GGATCAGCAACTGCTTCAAAAAACCCAGCAAAGACAGCATATCTTATTGCCTCATTACCAGC  
AATATATAACTTGCATCTTGTAGAACTGGTGTTGGAAAACCTATCCGGAAATTTTGATGTAG  
GCGCTGAACCTAATTGCTCACCAATAGATATCATACTTTCCACATTTCTTTGTATATGAAAT  
TCTTCACAAATTTAGGAACAGGGCTTGCATTAGGAACAGGGCTTGCATAAGTACCTCTGTTT  
GGGGGGAGTCTCCCTCCATATAACAAAACACAATTGCAGCTTGGATTGCTCTTGCCGCATC  
AACGGAATTTTTTGAAACGGTGCTTGTGCGATCTCTGTTATAACAGACACATCAAAAATTA  
TTTCTGCTTCAACAGTGTCTTCTGTTGATGCGTATAGAATCGCATCAAGAACTTTTCGTCCCAG  
CTGCTATTAATCTTTGTACATCTCTGGTCACTGTTCTGAAGCATTTGATTTTANNATCTTCACC  
AGGATAATAGTCAACGTATGATGATTGCTTCAGCAATTCATTAACTCTTCTTCATTTCCAT  
CGCTTCTCAGTCACAGCTGGAACGATTGCTATTGCTCCTCCACCTTGTTGGGAGTCATATGA  
ACTAGCAACGGCCTCCTCGGTCTCGCT

>Seq41 [organism=Erigeron ophiovirus] RNA3 genomic sequence

CCTTGGTCTATAACATTTCAATACTCCAACAGTTTTTTCCAGATTAAATTTCTTGCAGGTAGT  
TAATTGAATCTGTTGTTGAAAAATACCTGTTTAAATAGGAAATCTTAAAATACATTTTAAAA  
TAATAAAAAAGGTAAAGAAAACGGGATACAACAACGCCGTCATATAAAAGACCATAACATC  
ATAAACCTGCAAACACACCTTAACAATAACCTACCGTAACCGAAATCAAGAAACCCCATAG  
ACAATCTTAAGTGTAAGAACAGATAGCTCAGCAAAATCCGCTTCAGCATTGCTCAAAACATC  
CCAATATCTTACTCCATTCTGACAACACCGTACAGATTTTTCATCCTTCTTGAATGCTTCCCT  
CTTGTCTCTGTGATTTTTTGCAACCATTTCTTGTCTCCAGCCGGGCTCAACGTGTGCAAAAT  
GGCATTAGTCAATTTTCAAGAGAAAAATTCTTAATTGTGGGTCTATTTGGAGACTGTGGATGCA  
CTCTCAACTGAGCTTTTCATATTCCCTATCAAAGTTGCCAAAAAGTCGGTTATTCTTTTGCCA  
GTTTCAACCTGTTGTTATCCTCAAATTTTTTCGTTACAGTAGCCAGATCATCTCCATTTTGTAT  
CTCATTCTCTTGCCTTTTTTTCACAGCTTGCTACATAACGAGCATATCTTACTGCTTTATTCCCG  
GACACATATAACTTACACCTGGTTGCAAGTGGCACAGGAAGTATGTTTACATCAATGTTCAA

CAACACTTTTGGCTGGAACTTACTTGTTGGCGCAACAGATAAAATTTTTTCCAATACTTGTCAA  
GCTATCGATGGGTTCCCCGGTGTAGATTTCTTGTTCAAAAAAAGAGGAACGCTTCGTTTAT  
CTTCACCTGATCTTGATGGAAGATAGCCTTGGACAAACAAAAGTACAATCGCAGATAGAAA  
TGCTCGTTTAGACTTGACAATATTTTGGCGCAACCTCTTCGTTTGTCAAATCAGTAACTTGCAC  
AAACGAAAAAATCCTTCTTGAACTTTTATCGTTACCTAACAAGCTATACAAAATGGCATCAA  
GTACTTTTGTTCCTGCAGATACCAACCTGATCACATCAGGAACCAACTCTCCAGAATACTTTA  
TTTCCACCTCACCAGCTTTATAAAATTCTTCCTCTTGTCTTAAACTCTTGAAAACTTTTCCAA  
GTGCTTAATGATTTTTTCTCATCAATTACGTAAGAGTTCTCGTTGATGATTCTTTCTAGTTCT  
TCTACCCTTGTTATTTTACCTCCCCCGTGCTCTGACTTTGACGGGATTGAGTATTGTTGTTGT  
TGCTTGTTATTTTCAATCCGTTAACTTCGTAATCTTGCCAATGTCATTATATCCCCCTTCAGT  
CTCAGAATCTTGCTTTTCTTCATGTTCTTTATTCATTATTTGATTTTGAGGATGATATGAGATA  
GAAAAAGAGATGTGTATATGTTTGTAGGTTGAATCTGTTTGTGGACCACTAGATTTTCTATCT  
TTAAATAAAGGAGTGTGTGGGGGGATGGTTTCAATACTTCAACTTCCAAGTTCCTAATTTCC  
AGTTTCAATATTTCAACTTCCAAGTTCCTCATTTCCAATATCAAAAAAAGCATTCAATTACAA  
TAAACTTTAGAATAACAAAAAGGAGTATTATTTAGCTCACACGTAAAATTTACTCTTCCTAT  
ATAAAGTTTATATTATTTACTTTAAAATATCTACTAAAGATATATATATACAAAACAACT  
GTATATATGTTTATTTTCAATGCTAAACATAAGGGTAGTGCTATTCATTCATATAACAAAAGT  
TAGCCGTATGCAGGTG

>Seq42 [organism=Erythranthe ophiovirus] RNA1 genomic sequence

AACATATTTTGGTCTTTCTATTCTCTAGAAAAGGTCGCAATGACCGTAGAAGTGAACATAATT  
CTCCTGTCAATTTGAACTACTCATCACAGTAATCATCTTCATCCATTGCCTCATACCATGCAT  
CTTCTCCTGCTTCTTCAATTGCCATGTCCACAGTAGTAAGTTGGTTTTTTCTAATGTCCTCTTC  
AGTCACGTCTAAAAATCCTATAAAGTCAATTCTCTTCTCAAAGTCTTCAACATCAATTTGAAT  
TGTTTCCAGTGATATATCCTTGTTTAAATCTCTCTATCCCTGATGAAAGAATAGAAAATATGTC  
AGAATCATTATCTTCTTCTAAGTATGACATTATATCTTTGTATGATTTTATTTTTTCTTCAAGT  
TCTTTTCTTCTATCTCATCCATACTTTTCAAATGTTTGCTCCACAAATTTTCATACTCTTTCTC  
TGGTATTCTTGCCCAACAACTGGATCAGATATTATTTTACTTAAATACAATATTCTGTTCAT  
AATGAGTTTGTAATTTAAAATGTTATACTTTGTTGTTTTGTCTTTGTGTTTGAGTATTGTGCCT  
CTTCTTAAAGAATTTATTTCTCCTGCTCTTAGTAGTCCATTTCTACTCTGTTAGTCTTGAAAG  
CTAATACTGCTTGAGATGCTATCTCATATATATGATTTATTGACCTATTTTTTACGTTATTTAT  
TTTTTGACATTAATTAATTCTGATAGAATTTCTGTGTTTATTTCACTTTCTTCTTTTACCACCT  
CTAACATTAGTTTCCAACATTCTTTAGTTACGTTGTTGTTGAAGTTGCCTTCTAAGACATTTTT  
TGTCAGAATAACAAAATCATCAATTTTCATTTTTTCTGCCCCCTTATCATTACTAAGTTATC  
CTTCATAAATCTTTGATGAACAATGATGCTTTCTTCTTTGTGTCATCCCTCCCATCTAGTTTCCCA  
ATCATGTACATACTGTTTGCACCTTCATCTCCTTTTGATAATATATTTTTGATTGGAAATAGC  
AAATTCTTCCTAAATGACTGAACAGTTGAATTATCTATATAACAATACAAATGTGACTTGAA  
ATCGTCATAAGATTTTATTTTATGTTTGTGATCAGGATGTACATGAACGTAATCAGGATCTTC  
ATCTATCATCATTCTAAAAGAGTATTATCTGAAATTATTTTATGAGTATGATCTTTTGTTTTC  
AATCCTGACTTACTGATTACTTCAGATATTTTTGTTTTTCCAATACTGTTTGTTAATGCAGAA  
GATAATAAAGACTTGTGATATCCTCTTACATCGCTCTCATTCTTTTCTTCCACCTCTTTTCTGA

AATCTATTGTTAAGAAGATGTACCCAGGTGAATTATTATCAGGTATGTAAATCCTTTTCTCAT  
AACCTGATATTTCTGCTAAAACACCATCATTA AAAAATTTGAATAGCCCATTCA TTCTCAGTA  
TTACTCTCTTTTTATTGATTTTTAAATCTCCTATTATGTTACTTAGACAATCAGTCTTATTTGT  
GATATGAGAAATGTCCATTA AAAATAATATCATGGTCAAAATATTGAATGTAATCTTCTCTTTT  
GAAACAGTTGAAACTAACTTTCTTGCTTTTCATTCCGGGTATCCTTTGAATCAAATTATATCC  
ATCTTCCCTGGAAAGTGTCAAATGATTTATGTTTTCTTCCATCATAGCTAAATGAAAATCTCC  
TCTACCTCCACACAATTCAACAATTCTATCATTAGACTCTATAAAGTTATTGCTCTTCAATTC  
TGTTATCAAGCCTTTAGCACTAGGATATACAGAAGACATTGTAGGAGAAGAAATATTTTTTG  
GGTTGACACTTAGCTGGCAGCACATTTCAAATCCTTTTATTGCTGAATTTATACCCAGTTTGT  
CATCTAAGTCTATTGATTCGATCAGTATGGAGTTGTAATTTACTTTGCCATATATATATGTTT  
CATTTTTTTCTATTTTCGTTTAAAAATAGTTTCATATAATAATCACCCATTCTGAATTGTTCAAA  
TACTTTTCCGTCTATTTTCATCATGAATTTTCATCACTTGCAATTACAAATTTTCATCATAACTATAC  
CCCAATAATGGAAATGAATTTAAAATTATTTCTGTTATCCTCTTATCCTTGATATGAAAATGA  
CACTCATTTTCTCTTAACATAGAATAATTTTTAACTGCATTTTGAGATGTCCTTTTCCTATTTA  
TATTTAGTTTTATAAATCCATTACCTATATCTTCTAATCTATATATCATTGATGTCGCTATTAT  
GAACAATTTTATTAAGGCTCTTTTATACATTAGAGAAAATCCTTTAATAGCTATTTCACTTAC  
CCACATTTTGTCTTATCTTGACTATTTATTTTGAATAATTCCTCATAAAGCATACTCCTTACT  
ACAGCTCTTGAAAGGAGTCTCTTTTCCTATAATATTTGTTGATTTGTAATACTTGTA AAAATAAA  
TCAAAGAACGAATCCCTATTTACATTTAATTCTTCACAAGGA ACTAATTGATTGAAGATCTC  
ATCAGAAATCAGATCAGGACTTACCATCATTTGATCTTCCATATAAGAAAAGACTTTTCGAA  
ACGAAGACTCCATTGTAATCATTTTTTCTTTCATCGTGTGTACATGATTTACAAATTTTCCTTT  
TAAATCTTCATCTGTGGATATGAAACTTGAATAATTGTAATATAACTTACCTCTACTCTTTAT  
TCTTTCTTTAGTGGCAAAATTCATTCTAACTATATTGTCCAATCTCCCAATTGGATTTTCTAAT  
CTTGTTAGTTTAAAGGAAACATCTCTTAATTCACCCATAATGTCATCAGTAACTCCTAGTGGT  
ATTA ACTCATTAGGACTGGGTCTTAATATTCCTAAACTGTTTTTACATATATCATCAAATAT  
TGCAAATTTAGGTTGTTGCTGCTCCACCAGATGCTGTAAGTAATTGATCAACACCTGCTATG  
TCATATCTGGATGAAACTTGATTTGAAGATAAGTCTCCTGTTTTTGGATTGAAACCAGCTGTA  
AGTGCTCTGTGAAAATACCTACCACCTTTTGGACAAACAACGTTTTCTTCAATATCCTTGTAT  
TTTGCATCTGAAAAGGTGCTTAATGTTTTATCACATGTCATTATTAGAATTTTCTCATCTTCTT  
CATCCATTCCACCTGAAAATTTTTCTTGTTCCATTATAAGCCACTTTGTGTATCTAACCAAGT  
CATATGCTTTGAATATAAGTTTATGTTCAAACATTCCTTCTATTCCCATTTCTCTATCAAATTT  
AACTACATTAATAAAAAGTTTTTGCAGGAGGATTATTCTTTCTCCTTTTTTCGGTCAAATTAGT  
TGGTCCTTTATAAACAGGTTGTATTAAGTTCTGATATGGTAAATGCTTTATTTTCCCATCAA  
AGGGATCTCTTCTATTCCAAGGA ACTTTATTTTTATTTCTTGATCTTTGTTTATTAATTTCTTTT  
TCATATCTCTTTCCATTATAAGATCACTGAAACTTATCACTGGCATTGTATTTTTCTTTACCTT  
TAATTTATGATTTACACTCCAAGCTTTGTCAACTAATTCCATCATCTTTTTACCTCCTAAAAG  
CATTTTCATTGTTGTTGCATTATCTACTTTGGAAATTATTTTCGTTTATATAAGAGTATAGACTT  
TCTTCATAAAACTTTGAAACAATTCTTGAAGAAAAACAATTTCTAAAAGTAAATACAAGTTC  
TTTGCGAAATTCTTTTTCATTTTCATCATCACCCATGTTGATAAATCTTAACAATTCAGGGTTT  
TTTACCATTCTTTTAATGACTTTTAAATTCATCCTTTGTAAATAATTTAGTATCTTTTCTTCC

TCCTACCAAGGGAAATGAATTATCAATGTAAGAGCAGGCATTTCCAGAAAACATAACTAAA  
CTTCCAAAAATTCTTTTTCTTTCTCCTGTTAATAAACTTTGAATATAAATTATTCTTTTCACAT  
TAGATAAGCTATATCCTGAAATTAAGCTATCTGGCATTGGGGTCATTGCATAACCGTAAGTA  
GTGTATGTACCATAAAAAAATTGAAATAAAAAATTTCTTTTACAGGAAGGTTATTTACATGGTA  
ATTAAAGAATTGAATTATGTCAGATCTTTTAGAAGGAATTAATATTTTTGAACTATTCTTATT  
GTTTGAAAATTGCCTTAAAGACGACTTCATCATTTCTTTGTAGTTACTTAGAGTTTTGATATA  
TCTAGGATCAAATTCTTTTTCTTCCATTAATTCAGAAGTTATTTTCATTATTGAACTGCCCCACT  
AATTTAACTCCCCGAAAATTTCTCAGCAGTGTGTGTATAGTAATATCTTTGGACCTTGAACAC  
GCTGATGTGTAACCTGAGTCTATAAGGGTTGAACTTTCAAGTTGGTCCCCTAACATTTTAGG  
ACCATTCCGGTGAAATTGAAAAAAGTTTCTTGAAAGTCATATCAACAGGGCTTTGTTTGTAGT  
AGTGTTCTTTAACATTGAGCATCTTCCATTTGTTACTTGTGTTTGTGACAGTTTAACAAGTA  
ATCCCATTTTTCTCCCGTAATCTTGAACATTTTTTATCAAATTATTCAACTTGTTTTTCATCCAT  
TTCTTTTTGAATAAAAACTCCACATGAATCATCAGAATATGTAGTTCCTATAAAATCCTTTAT  
TCCCATTTGTGAAAACATGTCTTCTAGCATTAGTTGAGATTGTATTCCCCAAAGACTACCCAA  
CCAGCCTTCTATAGCCCCATATTGCCCATGAGAATAGTAAACAAAATCACTCCAAGTATCCT  
CATTATAAACATGGATGTTTGAAAAAAGATAGCAAATGGAAGTAATCTCCTCATATTCTTTG  
TCACCTTCATAAAAACCATACATATTCGCAATTTCTTCCAATATAAATAGAGTATTTTCAGGC  
CTTTGAGAAGTGTTATGACCAGAGTAATCCAAAAATAAAGAATAACAATCCTTATCTTCCAA  
TTTTAAGGACATTTTATACATTATATCTTCTTTTCATCATCAGTCATGGTCATCATTGCCCCA  
GGCAAAAGCTTCATTGCTCTCTTTACCAACTCCATCATGCTACTTAGCCACAGTTTTAACTTG  
AATGAGGCTATTCCAAAAAATCTTGCAGCTACCTTTTGTTCCTTTTCCTTTTCTGCAAGTCTA  
ACTCCGTACTTTCTTGGAATATTTCTTAATTCATTGCTTCTCTATGCAACACTTTAACAATCC  
TATCATTGCTTTTATACTTACTTTTATCTATATATATAGTATCATCTTCCATTAGTGACATATC  
ATTCTGTATGTAAAATTGAATTTCTTTTCAGAATTTCTTCTGGATCATATAATTCCTTTGTG  
CATGCTTTATCTATAATCCTTGACTGAATATTCATTTCAATGCCAGGTTCTAAAAATTTCCGT  
AGTTTTACTGTCTCATAATTGTTTATCTCGTTTACTATGCTTCCATTGTAATTCCTTTTGCAG  
CTTTTAGTTCCAAATGAGATATCAGATCTTCGGAAACCCCTGTTAGCTCTGGCACCCCTTCCAT  
GCTTTGAAATATAAGAATTGATCAATCTCATCTTAAGCAATGATCTTAACCTCTCAACAAGT  
GGATTACTCACAGGATGATCCCTATTTGTTCTCATGGTATATTTTTCCAGCCCCCTTTTTGGAT  
CAGTTTCCGCGATTATTAGTGTTTTTGCCAAACTGGACATTCTTATGCAAGTTTCACCATCTG  
ATCTGTTGCATGCCATTAGGAGTTTTTCTGTCAATTTCAATACTGATACTCATAGATTCCATGA  
CATTGTCAAGAATAGGCATAGCAGCAGATGAATTCTTGTAATCTGACATTAATAGACAAGTT  
GCTTCGAAAGTTCTTGCAAGACCCATTCTTTTTTCAGAACTCATACTTAGCAATTCTTTGTAG  
TAATTTATGAACATTTCTTCACTATAAGTAGCATAAACATCAGAATAAACATCCATTGTAA  
CAAATTATCTGCAATAAAGACTGAATTTTGCAAAAGCTCAGGTCTTCCTACATGGACAACAA  
CACTGTCAGTAAAGAAATATGCAGATATTGTTGATGACATAAATATGTATAATGAAGTTTCC  
TCATTTTCGAACTCAACATGAGTTATCGATGCTCCTATACGGTAGTAAGAAGTGTTTATTCTT  
TTCCCTTCATAAAAATCAACTGATTTAGAAAATTCTCTTCCCTTTTCTATTGCACTAGCGTTC  
ATCATTATGTTCTTATTTATTGTTTCAAAGATATCTAAAATCCAATAGGTCCTCATTGTGTTTT  
CAGACAAAGTAGTTTCTTTTTCTTAGACATATCAGTTGATAACTCTTTGTCCAGAAACATTA

AGCTTAACTTTGACTTTTCCATGTTTCATTATGGATTCTCCAAATTTCCAGAATATATTTGATTC  
AGAAGAAGGTCTTGAATAGGATCTTAACTTAGAAACAAGAACATAAGAAGAATCTTGGGTA  
GATTTGTATGTTTTAAAGAAAGCATCTTCTTTCCCAATAAAAAATTCCCTGAATATCATAAGG  
TCTATTCTGTTTTTTTGTCTCCATTTCTTTGGATAGTCATTTCTTTTAACATTTGAAGGTTTC  
AGGAGAGATGATCTTATGAGGAGAGTCTATCTTTGTTATTAGAACAGGTATGCCAACTTTTG  
GGTCTTTTCATCAAAGAAGTAGCATCAACTTTCTCTAAATCAACAATCATTTGAATATAGTCA  
ACAGTGACTTCTTTTGCTTCCATTTCTTTTTCTTTTTTAATTGATTTTCCAAGTCTTCAAATC  
CTTCTTATACCGAGAAAAAAGAAAGAAAATGTTAGGGTAGTTTGAAATATTGATAGAATTG  
AAAGCCATTTTCTTGATATCAGTAGAAGACAATAATTAGTTTAAAGTATCATTAAGGTTTT  
ATTAACATAAAAAAGATGAAAGAAAACAAGTGGAATCAAAAAACAGAAATTAAACTGAT  
TTACTCCCTGTGATGATGTCACCTTCATGTCCTGACTTCCCAGACATTTTGTTCTTGTAGGTAA  
TGATCATCTTGTTATTTTCTTCCATCTTTTATTTATCTCATCATTCTGCACATTAGTAGTTAA  
AATGTATTGTTTTGGGATCTTAATTGCACCAGGCCTGATTATCATTATCTCTTTAAGGACTGA  
CTGAAAGACTATATCTGCTTTAGTTGCAATTATGGTATAGTCATTAACAGCAACTTGGATATT  
ATTACAGATAAAACACTTGATAGTCCTCAACATCTAGCATTTCATGAATTTTATTCTCTGATTC  
TATTATGATGATACCTTTTGGTGACAATGGTTCTCCCATTATTTTATCAGAAACAATCCATGA  
TCCAAAAAGAAATCTAGTAACAACCTTTGTAAGGCAATTTGATACTCATAAGCCTTATGAGCC  
TGCTTCCGTTTCTCATTCTAGTTCTTCATCCAATTTCATAACAATGGGAGAATACTTCATTTT  
AGTAAGGTAATTGAATGAAGAACATCTAACACATTCTTTTGAGTTGCCATGACCTGGAAAAA  
TTGAGTCCATGTTTTTACAATAAGGAAAATCAGATGAGTTCTTGTAATAATTTGTTTATGTAA  
AAAC

>Seq43 [organism=Erythranthe ophiovirus] RNA2 genomic sequence

GCGGGTGATAATTTTCTTTAAATTATCCAGTTCCTCATGTGAATGTTAGCCCATTCGCTAGAC  
TGATAGCCAGCTCCTGACACTGCCTACCACTGACCAAGATGATCAGATTCACTGAGAAAGGG  
TGCAATACCCGTAGAAGTGAAAATAGTAATTTAATACTATTTTCAGTGAAGAGTTTTATTA  
ACATAAAAGCTAACCTATAATCAAGTCTTCTTTGATCATGCCTAGTGAAAACATCATCTTCCC  
ATTTTCAATGTTCTCAAGGTGGAACATGACATTATCATCTTTTATTGCCATTGATTGCCACT  
TGAGTTTGTCTTGATACAGTTTATAATTCCAGATTCTACTAACCTTGAATAAGATATGATTGG  
TCTAGCATATGAACTTCCACAGCATATATTTTCAACCTTACCCAATAATTTCCCAACTTGAT  
CTCTGTTACATTATTTATTATGAAATAATTGATTGAATTATTATGTGGACTCTCTCTAATGTG  
TTCATGTCTCCTTGAAAAGAAGGGTTGTAGATCCAATGATTTGTTGCACTAGTGTCTAGTAAT  
ATTTCAATTGCTAAGTACAAAAGGAATTGATCTAGGCAATAATTCTTTTATATCTTCTTTGTT  
AAGCAGTTTCTTGCAATTCAGAACATGCACTGTTTTCAGACACTTTGTTTTCAGTGAAAATT  
CCTTTTATTCTTTCACTTCTTCTTGGTTATATTTAATCATTTTTATTTTCATCTGCTCTCGTTTT  
TCTTTTACATCATCTTGTACTCTTTTACACAATGATTTAATAGATGATGTCTTATTAATATCGA  
TTGGAGATTCGACATTGTCTATCATCAAGGTAATAGATTTTCTTGGTTGTATCATTGCAGGGC  
TAAATCTTTATGTATGTAAAAACCAATTAAGAGAGAAGCATAAGATCTTCCAACCTATAGGT  
ACATTAAATGCATTATAAGATAATTCAATAAATTTGATATCTTCAGACCTGGTAAAGAAAGA  
CATTGACATTTCTGACATACTCATTGAATTTAATGGGACGCTAACTGATGAAAGTACCTGAC  
TTTCTTTGGAAGCAATTGAAGTATCTCTTAAAGAGAAAGTAATTTCTTCGCCTTTTCTAGGC

TGCTATCGAATAATGGAATGTACAAAATTTTCACTTTGTCTATTCTATAATATGGATACTCTT  
TTCCAGCAGTCTTTTTTCATTATAGATACTATATTCTGAAGTGTTGACAATTTCACTTTCTGAG  
AACCTGATTCTTTTGTAAGTTTCAGGGAGACAGGAGAGATGACTGATTCTATTTCTCCTTTTG  
TAATTTGAGTAAATTCAGCTGCCATGCACTCAATTTCTTGAGATATTTCACTATCACCTTTGA  
GTGACACCAGAGTATGTATTCCTTCTCTCATCATTTCTCTTGTTGCTCTTTTAAATGAAACAG  
AACCTTCCCATACATCTGATGTGCTTCTCCTACTATTTTGTGCGAGTAAAAGAGTCCATTTTCA  
ACTGAAAAAATTAAATAACAAGTTTTGAGAAAAAGGAATTTGATGAAATTTTACCTTTTAA  
AAAAAAGGAATTT

>Seq44 [organism=Erythranthe ophiovirus] RNA3 genomic sequence

CCCAGTTGATTGATTTTTTTAAAACCTTATCGTGTGCCATCCACCCCAGTTGATTGATTTTTTAGT  
TAATCATGTTATAAGCGGCTCGGACTCCAGCCAGACTCAGATCACCAAAATCTGCTTCCTGG  
TTTTCAAGAACAGAAAAGACTGGCAACTGATTGTTCCAGTTCTCCAAAAATGTTGACATC  
CTTCCTGAAAGCTTCAATATTTTTCCGAATTATGTGATTGCGGAATTCAACCCTTCCATCCTC  
TGATAAACTATAAATGATAGCACAAAGTAAGTTTAAGAGTGAAATTCTTAATCGTCGGGCGAT  
TCGGGTTCAGGGGATGCAATGCTTTCTGGGTTTCAACATTTGTGGAGATTGAGACAAGAAAG  
TTCATCTCTGTAAGGCCAAATCTAGTTTGCGCCTTCTTTCCATGAAAGCCTCCATGGCATT  
ATATCAGTAGGGGTTGCCCTATAGTGCCTTTCTCAAACCTGGCTGCTTCTCTGCATACCTA  
ACTGCCTTGTGTCAGCAATTGACATCTTGACCTAGATGCAACTGCAGTAGGGACGTGATT  
GAGTTCCACCATCAAGAATGAGTAAGCCGAAATTCGCAGGGTCAGTACATGAAAGTGCT  
TCACAAAACGCCTTTGTGGTCAGGTCTGTGTTCTTGAATATAGTCTCTCTGACAAATTTAGAC  
AGATTCTTGTCAGTAGCACCTAGAGAAGGAAGAAATCCTTGATTGTAAATGCAGCAAAAAG  
CACCTTTGATGGCCCTTTGTGCTGTCAAGAGATTGTCTGTGATCTCTAGGGATGAGACTTCAG  
TTAATGGTTTTTCAGAGACTTCAAAGATCTGATTGTTATCAGTATTTTCTCTGTAAGTCATGT  
ACAGAATTGCATCAAGAACAGCTGTTCTGCAGCTATGACATTAGAAATACTTACTGGAACA  
CCCTGAAATACTTTCACTTCACTTCTCCATTGTTATATGATTCATCATTTTTGGGAATTGAAG  
AAACGTAAGTTTCAAGTGCCACCCTTACATCATCACTTGTTATATGAACCACTTTGCTCCTGA  
TGACTCCTACAACCTCATCAGGAGTCATCGGAGTTCTGTCCTGATAGTCTTGCTGACTCTAG  
GAACTTGAATTGTGACTCCTGATATGCCGGGTCTTGCAATTCTTGGTGGACTCTGTGAAGAA  
CTGGATCCAAAAAGAAAAGGTGAAGGACTTACTGCTCCAGTAAATATCCCTGGTGAAGGAG  
TATTATTTCTTGACTTGTTGGCATGTTTGCCATATTCAGTATTTTCAAGCAGCTCTTCTTTTATT  
GTTCAATTCATCCTCAGAGCAAACAATGTTGTTTCTGTTTAGATATATTATTGCATTGGGAGT  
GTCTCTAGCCAATTCCCTGAGTCTGACCACATTTGCCTGATTGCGCCTGTTATCAACAAGCAG  
AAAAAGGTTACTGCATGTTCTTTTTTCTGCCTCATCTTTCTGTTTCTTTTCAACAATTGCCAAC  
AAACTTGAAGCAGTGTAGGATCCAGCCATTGTTATTCAGAAAAACCGAAAGAAAATAAAAC  
GATGGAATTATAGACGCTTGAAAACCTGAGCTATTAAATATCTCGATTACGAAAAGCTTTGT  
TGCTTCAAAAAAATTAATCCCCCG

>Seq45 [organism=Gentiana ophiovirus] RNA1 genomic sequence

GCCTTACTAAGGACTTATTTGGCTCAACAATTGAGCATCATTGTTCTCTTGTTTATACTCCTA  
GAGTTGAGTTAAGGTCTTTAACCTGCTTTCACAGCATCTCTTGGAAGTGTGTCATCTCACA  
TTGATTTTTTTGGAATTTTATTCTTATCACTTTGAGTTATTATTTTAATTCAATCACTTATTAG

CTCTATAATTCTAAATTGAAAATTCACCTTACTATAATTAATAATTTATTTTATTATAATTAAT  
AATCATCCTCTTCATAAACATCTTCATCTTCATCTTGATACATTTTTAGCTCTTCTACACTCAT  
TTTGGAGTTGATTTCTTCATTCATTTTGATTTCTTCTGCAGATCCAAACAAACTCGACATTATT  
GTGGTATTCTCTTCATCTTCTTTAATTTCTTCCAACACCACAAGATCTTCATTGTCAATATTTT  
TGAGGTTCTCTGTCATTGTTATGAAAAATTCATCCCTTTCCATGTTTCGCGAAATATTCTTCTAT  
ACTTTCATATTCTAATATCTTCTCTTCAATAATTTTCTCTTCCATCTTATTTTCCAAGTCATTTA  
ATATCAATCCTTTGTATCTTCCTCTATCATTTGTTGGATAATTGAGAAAACCAAACCTTTTTGT  
GAATTAACCTTATTCTATTTATCAACAGTCGATAATCTAGTATATCATACCTATTATCCTTAC  
TTTTGTTCTTCAATATATTATTGAAATTTATCTTCTTGAATCCCGAAACTTCCAATAGACCCCT  
TATAATATCTCTATTCTTATAATAACTTACAGCCATTCCAGCAATATTATGTATTTTACTAGTT  
GATTTCATTTTCTTTTTGTCCACTTTAAAATGCATCATAGTTTCCAATACATTTGTTTGACTTA  
TATTTGATTTTTCTGTTCTTAACATATCTAATAATAATAACCAAAAAGTCTATTTCGATGTTTATC  
ATACCTAAATGCTGAAATTGCACATTTGCTTAATAACTTAAACTCTTTAATTTCTAGATCATT  
GTATCCTACTATTATACCCATATTCACCTCATTCAAAAATTCTTCTTGTTACTACTATTTCTGAT  
GGGTAATTATCTAGTTTTGATATCCTGTATAATATATTATCTGTCAACTCATCACCTTTATTGT  
CAATAATTATCTTTGGCTTCCACACTTCTAATTTATTTTCAATTATTTGATCCAGTTCCTCTCT  
TTCATTGGTTGTTAATTTATCTTTTGAGATAAGAGATATTGGTATCATAGATAAGTATTTTAT  
ATTACTTTTGTCTTGCAATTCGGACTCCAAAGTTTTTGGGACTTCTATATAGTTATCACAATT  
CGTCATCATATTGATTAGTTGAGCATCACTAATGTCTTCTAGTGTATGATCTTCTACTTCATA  
AACTAAGTTGCTCATTGGATTAACTTTACCATCTTCGCAGTGTTTTTGTCAACTGTTTCGAG  
GATTAGTGAAGATGTGAATTTCTTCTTAAGTCTTTCATATTTTTCTGTTGTTATCATTCTTTTT  
TCTACTTCTTCATTGCTCATTTTTGTTCCTTGAAACATTAAATAACAGTATCCTGGGCTATCA  
ATTTCTGGGATGAAGAATTCCATTCGATCACTTAAGAAAGCCAAATTTCTAAGTTCTTCTTTT  
AATTTATTGAATATGCTGTTTATTCTGATTATTAATGTAAACCAGAAGTGACAAAACCTCATT  
AGCATACTACTTAATTTTTCTTCTCTCTATGAAATGTGATATGTCACATATTACGACATTA  
TGATCTAAGTATTTGGAATAATTATGATTATCAGTTACGTCATAATCTTGTTTTACTTCTAGC  
ATTCCCATAGCTCGATTTATTATATTGTATCCATCATTTCTTGATATTGATGTATGTTTGATT  
CTAATTGTTTCATTGCTATATGAAAATCACCTCTTCCGCCGAATGGTTCAAAAACCTTTGTTT  
TACTATTCAACACTCCTGAACTTTTAAAGCATAGTTATCAATGAATAAGCACTTGGGAAAACA  
TCAGACCTTGTCGGTGAAGATATCTTCCGTGGAGAACATGCTAAAGCAGATGTTATTTGAA  
TGTGCTGAGTGCCGCTTGAGTGCTTCTAAGTCAAGAAAATCCCTTTGATGGACACTGAATG  
ATTTGTATTCTACAGGTGACCATTCTTTATCAAATTTATCTTCAATATAATCATTATTTGTTT  
GTTATAATATGATAAAAATTTGCTGTTGAAGGAATTTCTTACCATCGATTTCGTCCACTAATTC  
AGAAGCTACTGATTTTCATCTCCTCAATTTCAAAACCCAATAGGGGAAGGCCATTTATTATTA  
TGTTGGAAAATTTCTTTATCTTTTATGTAAAAGTGTGCTTTGCCTTTTCTTAATCTTCTGAAATT  
TACAACTGTTGCATTGATTGTTCTATCTTTGCTTATCTTTATCATTGATTCACGATGTGTTAAA  
TTCTCAATATTATACACCAAGCTGGTTGACAATATGAATAATCTCATGAGAGATGTTCTATA  
ATGAAAAGAGTATCCCATTTTCAGATACTTCTGATGCCCAATTTGTCCCATTAATATTGTGTCT  
AAATAATTCTTTATATAATAAGGATCTTATAACCATTCTTGCTGGTGTCTCATTTTCCAGGAT  
ATCAATCCAGTATAATGAAGGTAAAAATCGTCAAAGAATTTGTTTCTATCCATTTGGTATCT

TTCAAAATTTGGGACTAGTTTTTTAAGTGTATCATCATTTATTAATTGAGGTAATAATTTTC  
TTTGTCTTTCATATATGACAAGACATTCCTATAACCTCCCCTTCTTCTATTAACTATTAGGT  
ATGTATTCAGCATGATTGATGAATTTACCTTTAATTCATCATCGTAGGACACAAAATCAGA  
AAAGGATTTATACAATTTTCCTTTATTCATTATTTTCTTTATGTTTGCCTCTTTCAATTCTCCCT  
CAAATTCTGTCATGAACATTCTTGGTTTCATACCTTTGAAGTTGAATGATACATCTCTTAGCA  
TTGCCTTTACATCTTCTTTTAATGATAATCTTATAATATCATTCTTTCCAAATCCAATTATTGA  
TAGTTCAGCTTTCAAACCTTGATAAGAGATATTGAACATTCAGGTTGTTATCTTCACCACCTGT  
TCTTGAAATCAGTTGATCTATCCACATAATTCAATGTGATTAGTTAATTCATTAGAGCTTAA  
ATCCCCAGTTCTTGCTTTGAATCCCCCGCTTTGAGCTCTGTGGAAATATCTTCCTCCTCTTGG  
AGCCACAACAAAATTTGATAGGTCTTCAAATCTAGTGTGTTGTGAATGTGCTCAAGGTTACAT  
TGCAAATTCCTTCTAAATTACTTATATCATCTTTTGATATTGATGAATATTTTTCACAATCCAT  
TATCATCCATTTACATATCTACACAGTTCATATGCATTGAAGATTAACCTTATTTGAAAACAT  
GCCTTCAATTTCCAAATCCCTATCAAATTTTACTTGATTCATGTGAGTTTTTAATGGTCTTTTG  
TTTTTAATACCATCTTTTGTCAATTACTTTGCTATTTTTCCAAATTGGAGTTATATCCGTGAAGA  
TTGTTGTATAAGAGAAGCTACCTAATAGTGGAGGTTCTTCTATTTCTATGAACCTGAATTGAG  
TTGTTTTTGTCTCCTCTCAGCTTATAGTTATATGACATTAACCTGTCTGGTATTTATTAACT  
TGATATATTTACATTTTCTCCAATTAAGTTCCTTGGTATTTGTATTCCATTTTGTAAATTAGCA  
TCCCATATTTTCTCCACAAATTTTGGATTCTTTTCTTACCTAATATGAATGAAAAAGTAGTA  
GTATTATCTATTTAGAATAAATTTCTTCAAATAGCTGAATATGGAACATTCAAAGAACTT  
AGCTGTTATCCTGTAATTAAGGCAATTGGAAGGTTGTTATGAGTTCTGCTTCGAATTGCTC  
TAATGATAGACTTTCCCTCCTGTTTACTATCTCTAACAAATTTTCATTCTTTATGTGTCTCTTC  
AATTCTTTTTTCAATTGTTCTTTCAAATAGTGTGTTGTATCATATCTTCCCCCATCCAATGGGA  
AAGATTCTTCAAGTATCTATTGGCTTTATCACTCAATTTTATCATTTTCCATATTTTGGTCTT  
TAGATCAGTATCTAGTATTGACAAAACATAATTGATTCTTTCAAATTGCTTAAAGAATAAC  
CTGATACAATTGCATCAGGAATTGAGGTTTGAGAATAACCATATACCGTATATGGTAAATAC  
ATTATTGCCAATATTGCTTGTTTTACTCTATCATTGTCTTTGTTCATTTTATAAAATGCTTCTG  
TAATGGTATTGATTGATGGAATTTTCATCAGTATTTTCTAATTTTCTTCTATATTCACCTTTCT  
TAATAAGAGGATGCATACCTAATATTCATATTTACAATTGAATAGAACTTAGGATCTAATT  
CTATTTCTAAGAATTCACAGAACTTTATGATATCCCTAGAAGTATAATATAAGAATTTATAAT  
TTCTTATCACTGTCTGTACAAAATGATCATCACTCCTTTGAGTTGCTGATGTGTATCCTGAAT  
CTATATTCCTTACTTGTTCTATGACATCCCCCATACCATGAAGAATTAGCAGATATTACAG  
GTATCTTTTTATAGTTGTTTTCTACTGCAACACCATTCAAGTAATGGTTCTTCAACATTGAAC  
ATCTACCATTGTACTTGAGTCTGAGAGAGCTTGAGTAGGAGACCCATTTTCAATGCATAG  
CTCTGCATGAATTGTATTATATCATTGAGTTTTTTCAGCACTCAGGTCCTTTTCTTTGAAAAC  
GCGCATGAATCGTCACTATAGGTAGTTGCAATTACATTTTCAAATTTAAGTTTTAACATCATG  
TCATCCATCATTAATTGAGACTGTATTCCCCATAATGGTCCTAACCATCCCTCAATTGCTCCT  
TTTTGTCCTTTAGAATGGTAGACAAAATCACTGAGACTTGTCTCATAGATTAAATCCATGTTA  
GAAAAGACATTCACTACTCCTGTCATATGTTCTCTTTCTTCGTATCCTTTATAATACCCAAAC  
ATGTCACATATTTCTTCCATTATAAACATGTTATTTTCTGGTCTTTGAGATGTGTTATGACCTG  
ATAATCTAAGAATATTGAGTAGGAATCTTCACCTTCTAAAAATGATGACATTTTATACATT



AGATCTCTTCTTTTCATCTTCTGTCATGGTCATCATTTGATTTTTGACAAGTTTCATGGCTTTCT  
TTACCATTTCCATGACTGTCGAGATATATATTTTTAGATTAAAAGATGCAACTCCAAAGAAC  
CTTGCTGCAGTTTTTAGCTCTTTTTCTTCTCTACTAATCTAACTATTTTATATTTTTCCATCTT  
TTCTAGTTTTCTGATTGTCTCTTGGGACAATGTTTATTTTTCTTTCAGCTTTTGATCTATCTTCA  
AATTTTATTGATTCCATGGCGTTTTTCATTTTCATTGGAATTGATGAAGTATATTAACCTCTTTA  
CAGAATTATTCCTGATGAATCATAATCATCTTTAGTGCAAGATTTATCGATCACTCTAGAAA  
TGAGTGTTGATTCTTTTCCAGGTTCTAGCATTTTTCCAAGCCTGACATCTCCATATAAGCTTA  
TGTCATTTATGATTTGATTGTTTTGTTTACCTTTTGCTGCCATTATTTCTAATTCTTGCTTTAGG  
TTCTCTGGGCATTACGTAATTCAGGGACTCTTCCAAATTTCTTCACATATGATGTTATTACA  
TTCCTTCTAAATGCAAGTCTCAATGATTCAATTGTTACTTTATCCACAGGATGATTTCTATTA  
GTTCTTTGTGAATATTTTGACAATCCTTTACTTGTGTCAACTTCTGCATAGATGAATGTCTTG  
CAATGCAAGACATTCTTATGCAGGTTTCGGCCTCTGATTCCACACAAATATTTATCAGTCTTC  
TAGTCATTGCAACTGAAATTTCCATGGAATCAATGATATTATCTATTAAAGGTAACAGTGCT  
GATTTGTATTTTCATGTCTGCCATTAATAAGCATGTTGACTCATAGAGTCCTGCTAATCCGACG  
CGTTTTTTTTGCAGGTAAGAATATCAAATCTGTTACGTAATCAATGAACATATTGTCTTTTCGA  
TATTTTGTGCGATTATTTCTTATCACATTTAGATCCTTGCTTATCTTCATGTTCATAACATTTT  
CAGCTAGTGTCATTAGATAGTTTTAAATGGTCCAGATTCCCCATACTCACTTTCCCATTTATAA  
CCCAAGCAGTCATTGTATGAGAAATAAATATTTTGATTGATTCAATTTCTCCATCTAGATCTC  
TCATGTCTATGTGCACAATTGAATGACCTGATTTGAATGTTTCAGCATTTATCCTTTTGTCTC  
ATAAAAAATCAATACTTCTACTATTTATCCCATTTATCTTTTTTTGAATAATCTATTTTAATTTT  
AGGTTTATCGTGTTCACTAGATCAAACACCCACATTGCTCTTGATGTATCTTCTGTTATTTCA  
ACTTTGTCTTTTACTTCATCATATTTTGTTTTTAACTTATTCATCAATCTGATAGACACAGCAT  
CTATCTCTTTCTCTTCAAGCTTAAGAGCAAAATCAATCAAAGTAGAGTGGAACAAAGATGTG  
TTCCCTAGACTCAATAAGTATTGATAAAGGTGCGTCACTTCGTCTTGAGAGCATGTCACGTG  
CTTATCAAAGAGATTGTTTTTCTTCAGAAATTGCCTCAGAAAATACAGATCCAATTTGTATCT  
CCTTCCCCATTTTTTCAGGGTACTTTTCCCCTTTAGTGAAATACTCTACCAGTTCAGGGCTATA  
TGTCCTGAATGGTTGATCAATTTTTGAAATAAGTGCCGTTTATCTACATAGTTCAGATCAAA  
CTCTTTTGGTTCCCATATTTCTGAGTATATGAATCCTTGAGGAAATTCAATCATTTCCAGTTTT  
GGTTCTTTTCGTTCTTCTCTTTTTTTTTGCTCGAAGATATTCTATAATTGTCTTCTCATGGTTTT  
CAATGAAAACTTTCAGCCATTCTTTCTTCAACCCTGATACAGTCTTTTTGAGATTAGTTA  
ACTCGTCATTTATTTTCATTTGATCCTCTTCACTTAAGTTGCTCATCACCCAGATTCTTGTTG  
AAATGTTTTCTTGTTCTCCATTGCTCAGTTTTGCTTGCTTTTCTTTATAAATTAATACAGAAAT  
CCTTTTCTTTAATCAGATGATTTATTTAAAACGATAATGCAGAATTCAATTTGTGATCATT  
AACAGAGTGATTTAGATTTGAAATTTAAATTTTATTGGAATTTTATTTGAAAATATTATCAAA  
ATTTCAAAATCATTAATAATTCGGTTGAATCAATCACCTTTTAATTTGTCTTCATTTGTTTTACC  
AGTCAATTCTATTTCTTGATTATTTTCATCCTCAACCGTAGACCTAGGAGTATAAAATTCTTC  
ATCATCTATTATTATTTCTTATTATTAATTATAATTATCTTTTAATTCATTATAGTATTTTCTTG  
TCTTGCTATCATACATCTGCAATATGTCATAATTTTCTTTGTTGCTTTGTTTCAGGAACAAAAG  
CATATTCTCCCAAATCTAAGTTTGAGTCATGAGATATTCTAATTCCATCTAGTCTTAGATTTA  
CAAAATCATCACTCAAATAATTATCATCAAAATTGCTCATGATTTGTATTCAATGCCTTCAA

TAAATACTGAGCTATTTCCCTCAGAATTCCTTATCACATAGCCCTTTTTCCTATTTATGAATTC  
ATCTGTTCTGTTATTATTTCAGTAACCAAATGCCCATTAACCCCTTATCAATGACACCGGGTAA  
ATTGGGTTCAAATTCTTTGATTATCTTCATTGCACTTTTTATTTCTTCTATTTCTCTGTCTAATA  
ATCTGTTAGAGATTATCACTCTATTCATTTTAATTCTAATCTACTAAGTATCTATTTTTCTTTG

>Seq46 [organism=Gentiana ophiovirus] RNA2 genomic sequence

CTTTTCAGACCACAGAACTACAGACCTGATCGTTCATAGATCTTTGGTTGTAGTCTACAGCCT  
TGGCCACGTCAGGGCATCATGTTTTTCTTGTTTTATACTCGTAGAAATCGAGTTTCAAGAAGA  
TCAATTCTTGATTTTAGACCTGTACAATTGAATTGTACTTTTAGATTTCTGGAATACAACTT  
GATCGTTCATAGATCTTCCGTTGTAACCATCAATCTGCCACATCAGGGCATTCTTTTTTTCTT  
GTTTTAGGCTCGTAGAAATCGAGTTGAAAGAAAATCAAAGCTTGATTTTGATTACAAAGTTT  
TATTTAAAGCGATGTTCTTACATATATTTAAACAGAAGATTATTGATCGCTTTAACAAAATCA  
AACAAACAAACAAACCAACCACCTCCAACTCAAACCATCATTCAATTGTCAACTTAGCCACT  
TTTGACAGATTCCTTCTCCCAAGCTTCATCCTTCAACACCATCCTTCCCTCTCCAGTATCAAA  
TGTGAGGATGATGACATCATCCTGAACAAATAAGCAGACCTCCCTTCTTCCCTCATAGAAT  
CAACAATGCCATCTTTCTTCAAAGCTAAGTAAGATATGAAATTTAAATCAGCTTCAGGGTCT  
TCAAGAAAACTGCTTCACTGAAAACATAAGTTATCTTATTGAGATCTACTCTGCCTGCTGTT  
TTGCATCCCCAGACTTCTTTTTTCTCTCCAGTTGAGAGTTGCTTGAAATCATGAGGAACATCC  
AATTCATTAAGCACATGCAATTGAGAAGTTACATCCAACACAAAAGGTAGGTTTCATGGGATT  
CTTAAAAATCCTGAAATTGAATTTTCAGAGATCTTTCAGTAACAGCAGGTACTAGAGTATGAA  
CTTGAGATTCAGTTGGTTTGACCTCCATAAGATCTCTATGAGTTTCAGAGATTGGGGAGTTGT  
CTTGAGCATAATCACTGAATTCAGATTCATATGCTCTCTCAACATCCCTATCTCTGTTAGCCA  
TCTCCTCCTCTCTCATCTCATCCATCTCTCTCTCAACTTCCAGTTCTTCCATGCTTCTCCTCCTA  
AAAGCAGCTCCTCCTCTAGGGCTAAAGATCTCCCTATTCCTCAGCAATTCGGATCTTGTTCTG  
GCAATGGCTAACTCCCTAGGACCTCTGATCATTATTCCTTTATTCTTCTGGTCATATTCCTCT  
TATCTTCCAATTCCTTTTTCTTATACTGACTCCCTCTCAGTATTGTTCCTTTTAAGATCTTCT  
CCTATCTGTCTCAGGATGGTCTTCTATTTGTATCTTTCGGTTCGCACTCTAGGTTCCATGCAA  
ACAATCATTTGTTGGTTTTTCCAACATCAGAAGAGGATTATAAGATTCATGAATGAAGAATCC  
AATTGTCATAGCAGCATATGCTCTTTTGATGATTGGAATCCCTTCAGACTCAATTTCAACTAC  
AACTTTGTCAACATTTTTCTTCGCTATAAAGAAATCCATAGACAGCTCAACAATAACCTCTTT  
TCCAGCATTGAACTTCACAGATTGAATTGTCCTTTGAGCTGACCCCATTTCTGCTCCTTCATC  
ACTCAGAGTCACAGTAATTTACCATCACATTCCCCCTATTAGCAAAAAGGGGAATATATA  
GTATTTGGACTTTCTCAAAAGTGATGAAAGGGTAATCTTCAGAACCACCTATTTTGTTTACAG  
CTGTTTTTATCGCATTATGCACTTTTTGCATTGATGTTAACTGCAACTTCTGCTTTTTGAATCC  
ATCTTTCAAGTTGATAGTGATTGGAGAAAGACAGCTTGTTATCTTATCAGTTGCCATCTTAGC  
AAAATCAGCTGCAAGAGATTCTATTTTCATCAGACACATCATCATCTCCGCTTATATTGATCAC  
TTTAGTCTTCCCTTTTGCTGCTCTGTTGCTCTCAGTTTGATCTATTCCAAGCGTCAACCTTCTT  
GAACTTGCTGGCAGCAGAGCCAAATCCATTCTTTCAGTGTTTCCATAAAACCTAGAAGATGT  
CGACATTGCTTCTTCAACTGAATACTTGCGATTCTCAAGCAAAGTGAATCTGCGTTTCTCTT  
C

>Seq47 [organism=Gentiana ophiovirus] RNA3 genomic sequence

AAAACGAAAGCGAGCAAAGCTCTAAATTATAGAAACATAAGACTTATTATTTAAGAAACAG  
AATTAAACACCATAAATAGCTTTCAATCCAACAACAGAAATATCCATGAAATCAGCATCAAC  
ATTCTCAATGAGAGGCCAATGAGCATCCTTCCCTTCCCCCATACCAAAGAAATTCACATCAG  
ACTTGAACGAATTGTTCTGATTTTTTACAATCTTCTCTCATCTCCAACCTTCCCTTTAAACT  
CAAACTTTCCAAGCAAGCTCTTGTTAACTTCAATGTTAAATTTTTTACAGTCGGCTTATCGGC  
TGATAAAGGATGCATTCTAAGTTGTGCTTTAACATTTCCACCAATGACCTCAGAAACTCAG  
TTAATTCTCTTGCTCTCTCAACTCTATCTTTCTTCTTTACTGCCCTTGTTGCTTCATCAGCATCC  
AATTTTCCAGCCACTCCAGGAATGACAGCCTGGTCAAAGTTTCCAATGTAATCTGCATATCT  
GACAGCTTTGTTCCAGCAATTGACAATTTGCATCTTGATGCTGTTGCTACATCAATCTTATT  
AAGATCAATATTTAGGAATGCTTTCGCTGGGAACCTTCTTTGGATCTGCAACGCTAAGATAAC  
CAGCTATAGTGGACAACTTGTCTACTTCAGAGTTGTATAAGTTTCTGATGAATTTTGGAACGTG  
GTCTGCTATCAGAAAGATCTTTAGGAGGAAGGTTCCCTGTTATGAATACCAGGGCAGTAGCA  
GATAAGATAGATTTCTTTCCAAGGGAGAGATTTTGAGCCATAACAGATGGCTTCAATTCTGT  
AACCATTATTTTCTTGAATATTCCATTGACAACCTTGATCATTTTTGTAGCTACAATACAAGAT  
GGCATCAAGGACCATTGTACCTGCTGCAATGAGATGCTCCACCGAATTTTCATTATCATTAA  
AGTATTTAATAATAATTTCCCGTTAGAATAAGCTTTGTCTTCACTTGAGGCTGTTGATAAGA  
ACTTTTCAAGATGTTCCCTTATGCTTTCTGCAGTGACTATTATTCCTGCTTTGTTGACATGCAG  
CTTAAAAGTTTCACTGTCTTTAATCTTCTCTTACCTACTGACTCGTAAGTCACATCGCTTTCA  
TTAAAATTCTTTTCTTTTTGTCCGGAACCTTCTGTCTTTGGCCTATAAGATGCGTCCATACTGA  
AACCTCCTGCTATTGCAACGACATATTGAGCACCTCCTCTCTCATACTTATCCAAACAACCTCC  
CAACTTTAATTAAATTCTGGGAATGGATAGTCTGATCTTCCTTAACTATAACCGAATTTCTGCA  
AAGTGTTGAGCTCATTGGTGTTACACTGTTTTTCATTTTTATTATATTTCTTGGCAATAGCATC  
AAGCTCCACGATTTTGATATGATCACCTTCCATTACTGATCAATTTTCAGTGATGAAGCTGATA  
AGATTTATAAACTATATTTCTTAGAT

>Seq48 [organism=Gymnadenia ophiiovirus\_den] RNA3 genomic sequence

ACCAGGATAACTTGTCAAACGATCCCATATGCTCCCTGACAGTCCCAACAGACATATCAGA  
AAAATCAGCATTAGGATCAACAAATATCGCATAAACCAGATTACCACTGGCATCAGTCTTTC  
CATAAAAATTCTCATCCTTCTTAAACGCTTCTATCTTATCAGAGACAATCTTACCACGCATAA  
TTTGGCGCCCAATCTGGCTTAGGGAGAATAAAACGGCGTGAGTAAGTTTCAGAGTAAAGTTC  
TTAATGGTCGGCTTCTGAGGATTTAAGGGATGCATTTTCAATTGCGACTTCCAATCAGCAGA  
AATGCTGCATAAGAAGTCCACAATTTCAGTGGCTGTTTCCATTTTTTGTACTCCCTCATAGC  
CCTCTGGTTCTGCAAATTGTCATTTATTCCCATTGTGTTTCGGTACTGGAGCCCTTTCAAACC  
CTTTGCTAACATAGCATACCTAACAAACCCTATTCCCTGCAATTGACATTTTACACCTTGAGGC  
AACATCAGTAGGGAGCCTTTCAATATTTATATTGAGAAATACTTGAGAAGGGAATTTTTGTG  
TGTTAGCAGAAGACAGCATTTTTTGCCAAATCACTCGAAGTGAAATTTGCATTACCAAAAAGA  
GTTACCTTCACAACTGAGATAATCCCTTTTCGACACTTCCATCCATTGGCAGATATCCTTGA  
TTGTAGATTGTAGCAAAAGCACCTTTTATAGCTTTGTGACTATTCGATATCCTTTCTACAGCT  
TCTTTGGGATCAAAGTCTGTGTCACCCAATTCTTTCATAGAAAATATGCTCTGATTACTGTCC  
AGACCCTGATAGGAGTAATACAGAACTGCATCCAAAATTTTTGTACCTGCAGCAACTAGATT  
CTTGATTGATAGACCAACATTGGAATAGTAAAAGATTGTGATTCTCCATTTAGGTATGGTTC

AGCATATTTTGAATTGTGCTGACATAGTCTTCCAGAGTTGCTCTTATCAAATCTTCCTTGAT  
ATCAATGCAGTGTGAGTCTAGAATTTCACTGAGCCTATCTAATGGTACTCTTCGTGTTTCACC  
TATCAGTCCAGGTGTAGTATTATTCATCCTTGAACCTCCAGCATTATTGTTACTCTGATTATC  
CATAACACTTTTCTCAGTCTGAGAGATTAAATTTCCATTAGCACTTAAGTAGATAATGTCATC  
CGGGTGAGAAGACATCACTTGTTCACCCATAGTATCTTCGCAGGATTTATCCCTCCATCAG  
ATGACTGGATTCCAAGAATTTTGAAGTGATCATTTATTTCTCTATCTCTTGTTCCTGATGAG  
ATAGATCGAATATTTGCTTAGCAGTGTAATTCCTGACATCGTTAAACTAGATTTTGAGAA  
ACAGAGAACGCAAGTTTAGGGGAATCTGAATTCGTTAATGCTGGATTACTTTTA

>Seq49 [organism=Gymnadenia ophiovirus\_odo] RNA3 partial sequence

CAGTAAGTATAGCAAAAACCAGATTACCACTGGTATCAGTCTTCCATAAAAATTCTCATCC  
TTCTTAAACGCTTCGATCTTATCAGAGACAATCTTACCACGCATAAATTTGGCGCCCAATCTGG  
CTTAGGGAGAATAAAACGGCGTGAGTAAGTTTAGGGTAAAGTTCTTAATGGTCGGCTTCTG  
GGGATTTAAGGGATGCATTTTCAATTGAGACTTCCAATCAGCAGAAATGCTGCATAAGAAGT  
CTACAATTCCAGTAGCTGTTTCCCATTTATTGTACTCCCTCATGGCTCTCTGGTTCTGCAGATT  
ATCACTTATTCCCATTTGTGTTTCGGTATGGGAGCCCTTTCAAACCCTTTGCTAACATTGCATA  
CCTAACAACCCTATTTCTGCAATTGACATTTTGCACCTTGAGGCAACATCAGTAGGGAGCC  
TGCAATGTTAATATTGAGAAACACCTGAGAAGGAAATTTTTGTGTATTAGCAGAAGACAGC  
ATTTTTGCCAAATCACTAGAAGTAAAATTTGCATTTCCGAAAAGAGTTACTTTCACAACTG  
AGATAATCCTCTTTCAGCACCTCCATCCATTGGCAGATATCCCTGATTGTAGATTGTAGCGAA  
AGCACCTTTTATAGCTTTGTGACTATTTGATATCCTTTCTACAGCTTCTTTTGGATCAAAATCT  
GTGTCACCCAATTCTTTCATGGAAAATATGCTCTGATTACTGTCCAGACCCTGATAAGAGTA  
ATACAGAACTGCATCCAAAATCTTTGTACCTGCAGCAACTAGATTCTTGATTGATAAACCGA  
CATTAGAATAGTAAAAGATTGTTATTTCTCCATTTAGATATGGTTCAGCATACTTTGGAATGG  
TGCTAACATATTCTTCCAGTGTGCTTTTATCAAATCTTCCTTTATATCAATGCAGTGTGAGTC  
AAGAATCTCACTGAGCCTATCTAATGGCACTCTTCGGGTTTCACCTATCAGTCCAGGTGTGGT  
GTTATTCACTTAGAACCTCCAGCAGCATTGTTACTCTGATTATCCACAACACTTTTTTCAGT  
TTGAGATATTAAATTTCCATTGGCACTTAAGTAGATAATGTCATCCGGGTGAGAAGACATCA  
CTTGTTCCACCCATAGTATCTTAGCAGGATTAATACCCCCATCAGATGACTGGATCCCAAGA  
ATTTTGAAGTGATCATTTATTTCTCTGTCTCTTGTGTCTCTGATGAGATAGATCGAATATTTGCT  
TAGCAGTGTAATTCCTGACATCGTTAAACGAGATATTGGGAAACAGAGAACGCAAGTTT  
AGGGGAATCAAAATTCGTTAAGGC

>Seq50 [organism=Holcus ophiovirus] RNA1 partial sequence

CTCGCAATGACTGTAGTATTGAACCTTATCACAAAGAACCTTATCACAAGACGAGAAGACA  
AGAAAGGAAAACCTTGACAGCAGAACAGTGTTCCACCTTTAATAATCATCATCCTCGCAATC  
TCCCCAGTGAGCGAATATCTCATCATCACCAAATTCCTTTTGTAATCTTCAAATGTGCTCAA  
GCGTTCATTCTCCTTTATGTCTTCTTCTGTTGCAAGGAAACCTAACTCCACAACTTTTCTCTT  
AATCTATCTTCATTCTGTGTTGCATTTTCCATTCTGTCTTTCATTGCTGCTACTGCACCACCCA  
AATGGTCCATGAAGGAGAAATATTCCTTATCCAGATCTAGGAATAATCCATCCAATTGCTCA  
GGAGTCATGTTAGAAACATCAATTCGAGGTAGTTGTACCCCTTCATTTCGTTGAAGATAAGCT  
GTTCCAGATGTCATTGAACAGTGAGTGTATTATCCAAGGAAATGAGGTTTCATTGTTAATTC

TTGAGAAATGAGCATGATGCGATTCATGTACAACCTATAATGTAGTATATTGTTTCTCGTCGT  
CTTATCCTTATGGTCCAGTATAGACCTTTTTCTTACATTATCTAGGTTTGCAACACTTAGCAG  
ACCCTCAATGATTTTTCCAGTCTTGAATGATAGTATTGCTTTTGAAGCAATTCATAAGATGA  
ATTAATTGTTCTATCTAGGTTTTCTTGAATTTCTGAATATTTATCATCTCTAGGACTTTATCT  
GAGTCTACCCTTTTTCTCTTGAGATGATAGATTCAGTATCAATTTCCAACATTCTATGGTCATT  
CTCTTATTGTGTTTGGTTGTCATTAATTCATCAATTAATTCAGTTAATTCTGTTGTGGTCATCC  
CTTCTACTCCCCTTACTATGACAATGTTGTTGTCTGATATTAGTCTCTGGTCAACCTCTATTAT  
ATCCTGCTTTTCCCTTACGTATTTTCCCTCCTAGGCCAATTAAGTTGTTTGGAACATTTTCGTCT  
TCTGAAGGTCCTTTTGATACCAGTCTTTTGTCAAGTCTATTATTTTATCTTTCATTTTATCTTT  
AAAAGCTTTTTTGACATAACCCAACATATTATCTTGAAAATCTTCTATAGATTTTATTTTGT  
CTTCATCTCAAAATTGACATGAACATATTCAGGATCTTCTTCGAGTAACATCTCGGTCAGAGT  
TGCATCACTTATCACTTCTTCAGTCTGATCTGTTACTTTAACTGGTGGAAGTCTGATATGACACT  
TCTGAGAGAACTCTCGAGACTGCGTTTATCAGAGCAGAAGACAATATGGACCTAGAGTAG  
CCTTTTAAGTTCCCTGAATTTTCCCTTAGTCTAATATCTTTTGTGAAATCTATTGTTAAATAAA  
CATAACCTGGTGATTCTAATGCAGGCATGTAAGCAGTCACCTCATTTCCTCTTATTTCTCTCA  
ATATTTCAATTGTTTATAAACTTGTTTCATACCATTCAATCTGATTATCATCTTCTTTTTGCTCAA  
GTGGCAATCCCCACAATTCCACTTAAGCAATCTTTTTTCTCAGTGATGTGAGAGATATCAAT  
CAAGATGATGCTGTGATTAAAATAACTTATGTAATCTGCTTGTCTGAAACAATTAATCCTG  
TCTTTTTTGATGTCATTCCCTGGTATTCTCATGGCTAGATTATAACCATCTTCACGTGACAAGG  
TGACGTGATCTATTCTGCCTCGAGCATTGCTAAGTGGAATCCCCCTTCCCCCGCAGAGTT  
CTACTATTGAGTCATCTTTAGTTATAAAACCCTTCCCTTTGAGTGATTCTAATAGTCCTTTTCG  
TGATGGATAAACAGCAGACATTGTAGGAGAGGAAACCTTCTCAGGACTCACCATCAAGGAA  
CAGGCCGTTTCAAACCTTTGAGAGCAGATTCTATGCCTAAGTTGTCTACTAGATCATACCA  
CATGATGTTCAATTCATATATTCAACCTTCCCATATTTTATTCCATCCTTCTTCCTTGTCTCA  
GATTTGTGCATGTCCAAATAATAAGTCCCTAGTCTCATTTGCTCAAATTCTATTCCAGAAATC  
TCATCACAGAGCTCACTTGACATATATGGACCTCAGAATAACTGTATCCTAAAGTAGGGAA  
AGAATGCACAATCATCTCGGTGATTCTCTTATCCTTGATGTAGAATTGGCAAGTCCCTTCTCG  
CATCTTCTCAAAATTAGACTTACTATTCATCACGGTTCGGCTCTTATTAAGTGTAACTTCAT  
ACAGCTCTGCCTGGATTCAATCATCTATATGACAATGATGTTGCCAGAATAAACCAACCTCA  
AGAGAACATCCTTGAAACCACTTGAATAGCCTCTCTTGACTAATCACTTGCCCACAAGGTC  
TTCCTTATTGACCTGTTGTTGACTTTAAATAGTTCTTCATAGAGTAAACCCCTTATCACTGAT  
CGTGAAGGCGTTTCATTCCCAATCACATTTAGAGATTTGTAATATCTATAGAATTTATCAAAG  
AAATCTATTCTGCCAGACTTTGCAACATCTTCTCCAATACTGTTCAAATACGGGCTCAGA  
AATTAATTCAGGACTGATTATCATTTGGTCTATCATGTACGAATGGACTGCTCTGAAAGCAC  
TCTCTTGCTCTATGTATTCTTCACGAGTTGTGTCAACATGGTTGATAAATTTACCACTCAAAT  
TTTCATTCAATTTCTATGAAAGTGAGTAATTGTAGTACATTTTCCCCCTTGTTCTTATTTTTTC  
TCGTGAGGCTATATTGTACAGTTGTTTTGGCTGTTCAATCATATTTAAATCAGTCAGTGAGAA  
AGTGACATCTTTTATGTGCTGGAAAATGTCATTGGTAAGAGTTAAAGAGACGAGTGACTTTG  
GCTCTGGTCGAAGCAGAGAGAACGCAATTTTCACATATATCATCAAGTATTGAACATTGAGA  
TTATTGTCAGAACCACCTGTTTTAGCTAGTAAGTATCAACTCCTGTGATGTCATAATTGTTT

[illegible]

>Seq51 [organism=Holcus ophiovirus] RNA2 genomic sequence

AATGCACTTCCTCAAATTAACCTTCACAAAAGCTCAAACATGGCTTTGTTCAGGGTTCCA  
AAACGAAGAACGTGTAAACTGAAGTTAATCAGCGGGCTGCGATAGCCGTAAGGAAATACT  
GGTGTGTATTTCAAGTGTCCCTTTTATTTAAACTTAAGTACACGCATCACGAAAATACAAT  
AAATTATCACACGACATATATATATACGACAATCTTATTAATATGTTACATTTTACTATTATT

AAATTACTACTTTAAATACATTATTGTATATTGGAGACATATCATCTCTATCATTCCCTTATTTCTCGACTAAGACAACAGGGCTCAAATTATTGGATTTCTTGAACACCATATAATTACCACTGCAATCAAGCTCAAATACAATCTTGTCTGCTTTTCAGCAAGACTGCTACATCATCACTCTCCGACTTCAAACAATCCACAATTCCTCCTTTGACTAACTTCTGGTATGAAATCAAAGGAAAATCATCCTTATTCGCATAAAGGACCTCCTTCATTCTAACCCAATGAGACCCTAGCTTCACCTCCATCCCATTCATGGCAAAATGTGTCTCTCCACGTCTTCCTGGTTTGTTCCTTAAATCCACACAGACCAGGGTTGTAGAACCAGTGATCAGGTGCTCCTGTGTCAAGTATTATGTGATCCCCCTGTGAATTGGGACCTTTCTTGGGAGAAGATCAAGAACATCTTTCTCCCTTATAGGCTTGTAGTTATTTTCTACTTCAGCTCCTGAGTCGTATCCCCCAGAAGTCTCCTCATCCTCTTCCAGTGATTCATCTTGATGTTGTTGGTGAATCTCATACTACTATTTTCGTTCCCTCCTCTTCATCATCATACTTCAGTTGAGCAGCCTCAAAAGAGCCTTTTTTTTGCTTCAATTCTTTTATTCACAGTCTCGACCAAGTTCTTAATAGAAGAAGTTTTGTTGATGTCCTTCGGAAGTTCTATATTATCGATCAAGAGGACAACAGGATTCTTCTTTTTGATCGTCATGGGAACGTATTCCTGTGTATGTAGAATGATAAGCAACAAACGCGAATGCCCTTCCCCTAACAGGCACCTTTTGTGTCTTGTAACAGAACTCTATCATGCTCAAGTGAGCTTTTGGGATAAAATAGGAAGAAGAGAGTTCAACCATGCTCATCTTGTTCA AAGGACAAGAAGTCTTAGAAACAGATTTTGACTTCAGCCCAACTTTTATTGAGCTGTCATTGATAGAGAATGTTATCTTCTCACCTGTTGCCTCTTCTTCGGGGAACAGAGGCAAGTACAATATCTTCAACCTATCCACTCTATAGAATGGATAATTGTGCTTTGGGAGTGAGGCAACAAGTGATTGCATTGTCCCCAGTTTGACTTTCTTTGCACCTTCTTTCTCAGTGAGTTTTATCATCATAGGAGAACTATGGAGTTTATGTCTCCTGTTATGGCATCCTTGAATTCTGCAGCCATGCATTCTATTTACAGGAGACATGGCTGTGTCTGAGCTCAGTGATGCTAATACAGTTATTCCTTCCTCAACCATCCCTTCAGTAGCTTTAGCAAATGAAACACTTGGAATCATTGCAAGCTCTTTACCTTTCTTCCATCTCTCTTTAATACCCCCGAGTTCGCCGCTTGACCAATCTGAACTTGCTTGGCCATTGGAGTTAGGTTGGCGTTCAACTGGATTTTTAGAAAGTTCTTCTCCTTGTAAGTCTAGGCTTTTGTTCAGAAATTTTGCATC

>Seq52 [organism=Holcus ophiovirus] RNA3 genomic sequence

TTGGCAGTCTCTAAGACTTACACTCCTTAACTCAAAAAGTTCTTGAACTTAAGACCTTATTCCTTGTGTCCGCATTTCTTTCTTATCCTCACACCTCTTTAAGTTGATAACCCATAAGCAATACGGATCGCATCTACTGACAGCTCGGAGAAGTCCGCTTCTTTGTTTCATCAGGACATTGTGTGTCACCTCATGTATTTGGTTGATTGATCCATAGAAATTAGGGTCACGTTTGAAAGATTCTATCTTTCCTTCATCAATAGTCTTTCTGAGATCATCTCTTCCTTTTGGGGATAGTGAATATATGATAGCACAAGTCATCTGTAGAGTGAAATCTTCCTTGTAGGTCTGCTTGCTGATTAGGGTGCATCCTCTTTTGTGCTTCAAAATTTGATCCCAGTGAGCTCAATAAATCAGTTATTGACTTTGCTTTGTTTAACTTCTCAACTTCAGCTGAAAATCTTAGTATTTACAGCCTGATCGCCACTCCTAGGTGCTGTGACGTTATTCTTTTCAAACCTCTGTGCTAACATCGCATATCGTATTGCTTTGTTCCAGCAACAGACATCTTGCACCTCGAAGCCACTTCATTAGGTAAGTGAAGTCAACTCTATTCCCAGGAACACTTCAGCTGGGAACAACTTGATCTGCAGATGAAAGCATATCAACAAGCACGTTGCTGCTGAGCCCTGATAGCCCTTGAACAGAGTTTCTCTGACAAAATTTGGTAGTTGTTTTTCTCAGTTGATTCGATGGAAGTTCTCCCTGAGTGTAATCAGACAAAATGCAGCTTTTATTGCCTTGTTTCATTCTCAATCTTTTTTGAAGATATCTGTTGCATTGACAGTCCCAGGCTTCAGTTCAGTTGTAG



CAAAAATAAAATTATGTTCTGAAGAGTCCTTATAAGCCATGTACATAACAGCATCGAGTATC  
CTCGTCCCTGCAGATAATAGGCTGCTTATAGAAAGAGCAACCCCTTTGAACCAAAATACTAA  
AATATCACCTGTTTTATAAGTCTCAGCAGTCTTAGGTAAATTCACAATATAGTTTTCAAGGAT  
ACTTTTGATCTTTCCAGCATCCATTGAGAGGCTCTTTATCTGTATCATTTTCATTGACTACTTCA  
GGTGA AAAATTCAACCTCTTTGCCTTTCTCACTTGCAACTACAGTAGTCCCTGAACCAACCTTT  
TGCATCGTGCTCGAGCTAACAGTAGTGCTGGTGATGAATTCAAGTGTTTTGTCTGATTTGACA  
TACACCATTGCATTTGGGCTCTCCTTCTCCATCTCCTTCATCTTGTTTCATCACCTTTGTGTAA  
CTCTTTCATCTCTCTCAATATTTGTAGTGATATCAGGAGTTGTTTGTCTCTTCTGTGTACTC  
AAGTTTCCTTGCAACCTCCATGACTTGGCTAACAGTCTTAGTTCCTGACATTTTGGCTTGAGA  
CTTCTGAGTTGAGTTCTTTTCGGTTTTGTAAAGTTTGAGATTTTGCTC

>Seq53 [organism=Holcus ophiovirus] RNA4 genomic sequence

CTCATTCTTTAGAAGAAACACGTGCTGCCTTCCCTTTACACCATATCCTAATTTGATAAAATC  
GCCAGGGCGGCAAGGTAGTCAGGCTCTCCCTAGACCTGCAGACATAATCTACTGACCCAGT  
TCGCCTGCTAGGATGTCCAACTTACCGCGATGGACCCCATCACAAGTAGAGCTCTCTTTTTG  
GAAGAAGTAACTTCATTTCATGTCTGGCCAGCGTACTCGCTACTTTGAAAGCTTTCTGATAA  
ACCAGTTCAATCCATGTTGCTAAATCTTCACATTTCTTGTTTATTTAAAACAAATAATCAAAT  
AAATATCATTTCTTTCTAATGCTGTATTTTCAACAATTATTGCAGTTTCAATGAAAAATCAT  
TATAAAAAACGACAGAATTAAAAGAAGATATCACCATCGTAATCTTAGTACAGAAAAGTAT  
CTTATCACTGCAGCTTCTTTTCGCCCTTATTCTTCCTACTTCTCTCTCGATTGGTCTTTGGGGT  
ATAAGTAGGATAATATAGTGTATCAAACTCAGAGGTAGTCTTATAAAGACGTAACATAGTC  
GAAATCTCTATAATCAGCTTGTCAAATACATCATCCAGTACAAAAATTTCTCCATTGTGTTTC  
TTCACAATATTGCAACACCCTCTAGGAAATGCTAAATCATATGTGTTTCATCACTTTGTCTCTT  
GAAAACTGAGTCAAGAAGTGATCTTCTTTTATCCCCATCTTGTTCCATGTGAATGTTATTAGT  
CCAATCAAGTCCAAAGCTGCACTGTTGTCTTCCCTTTCATACCATAGTGGTCATCATCTATT  
TTCGAATCAAGGCTAGTAATGTATCTATCCTTCATGTATTCTCTTGGGGTTGTTCTTCTAGGA  
TGCACCTGTAGGAAGTAATCAAGCCCACTTTCGAGGCTTCTGATTATGCTATCTTTTATTGGG  
GATATGAAAAATTTCTTCTCATGCAGTGCAAACTTTGTTTCATCTCATTTGAGTAGTGGTTT  
AACAGGTTACTTTCTTTTAACTCAAATGAAACAGAGTCACAAGACAACCTCAACTAATGAAGG  
AACAAATCAATTCTTTTATAATCAATCCCTCAAGCACTTTCAACTTCTCATTGAACATTTCTAT  
GATCTTCATTCTACTCTCTGAATCCAATGAAATTGTTCCCTGTCATACTGCTGCTGAAGTAGTC  
AAACTTTTTATCGATAAATTCAATCCTGTTCCCTCAGAAAGATTATTTCTTGCTCATTTAGTTC  
ATTGATACCATTGAATGGTTTGAAAGCGATGTTTATAATCTCCTTGACGTGAGGAATGATTG  
ATAGTGCTCTACAGAGAACCGGCTCAATAAACATGGCCCATCTTATCATGAAGCTCATATCG  
CTGTCAAGCTTTGATGGTTTGCTATTTTAACTCTTGTTGATCATAAAGTTTTTGATC

>Seq54 [organism=Lepidozia ophiovirus\_tri] RNA1 genomic sequence

GCGATTGCAAAATTTGGAAAGAGCAAGAAATATGGCACTGAAATATGAGGAATTTGAAGAT  
GATGGAATTAAATTTAATTA AAAA ACTGTTCAATTTTTATCAGCACCGCTGTTAACCGTGTACA  
AAGTGCACCTGAAAAAGTGCAATCCAGTTTCAGGATCATACTTACCAATCTTCATCAAATTC  
CATTCCATCATCTTCAAATTCCTCATATTTCAAGTGCCATATTTCTTGCTCTTTCCAAATTTGC  
AATCGCTCTTGTTCTTCATCCTGGAACCTCATCATATGTTGTCGTCAACATATAAGATTGTTCA

ATCTCTTGATTTTTCTTCACATTTTCATCCCAATCCTTGAAAAGCCCTTTAATAAAGGTATCTG  
TTTTTATGGGTTTCATCTATGGTGATTTGTTCTACACTTTTATCTAAGTCCATTGAATTAATAAA  
ATTGAAGAAATTATCATTGTCCGTATTTGATGCTTCAATAAACTCTTGAATAGTTTTAAATTG  
AGTGTAATGTTCTCTGAATTTTTGCAAATCTTCATCATTTCATCCTTCCAGCTTTAACTTCCGTT  
TTCCAAATGTCTCTCACAAAAGATTTCGAGATCTTGATTGTTTCGCTGTTATGTTGATGTCTGTG  
ACTTTCTTTACAATGCGGTTAATCCTGTTTAAGATTAATTTGTAATTAATGATGTTGTTTCTGT  
TGTTTTTTGTCTTCACTCGCATGATGGTGCTAAGATTCACTCTTTCAAGACCAGAGATAGCTA  
TAAGACCTTCTTTGGTTCTTCCGGACTTCCAAGAATTTATTACCTGAGTAGTGTTGTAAACA  
GATTATCAATGGTTCTTCCGACACCTGAATTGCGTAGGGATTCAATGGATATCATGGGAATG  
ATATCATCAGAAGTATTTTATCATAATCCTTTGCTAGGTCTAACAAAAACATCCACAAATC  
CTTTGTAATCGGTAATGTATTCTGATCTTGTATGTGCTGAACAACCATGGTTAGATCAGAGA  
ATTTTCATCTCCTCAAATCCTGTTATTACAACTTTTGGTAATATGTCTGCTTTTTTCATTTATTAC  
TTCTAATCTAGTCTCTCCCGTTCTTCTATAATGCCTCATGCAGGACACGAACGAACCAAATCC  
AATATCAAGATCAGATGTGATGTAATCGAAATATTCAGTTTTTATCCCGGGTATGTGTTGCA  
AACCCTCAGCACTTGTGCAGAGTAATGCTCTTATGTCATCAGAATTTCTCACATTGTTTTTTA  
GGGATTGAGGGACCTCAACAATCGAATCCTGAGTATGACTCATTAAATGAATCTAATAATTCA  
TCATCTGTGATGAATTCCTTCTGTATGATCCACTACGTCTTTTCCAATATGACTCAGCATGGGT  
TTGTGTAAGAATCCCATGTTTCCTTGAGACAAGTATTCTAGTATCAGGTACCAGCAAACCTT  
TTATTGCTGCGTTTTCTGGAAACAATTTCCCTCCTCTTTCTTTTGCCTCCAGTGTGAGATATA  
AGACCCCACTGCTATTCTTTTCTGGTATTAAGATTTCAATGTCACAGTGTGACCCATGACAT  
CAATCAGTTTTTGAGTTATGATTGAAGATACTGCATTCCATCTGAGAACAAATCTTTTTCTTGA  
TAGCAATCATTCTGATATGCCCTTAGTTAATAAGTCCTTCTTTCCAGTAAAGTGTGATACAT  
CCAAGAGAATAATGGAGTGGTCCATGTAATCCATAAAATTTCTCTGGAGAAAACATTCCAA  
GAAGGTTTCTTCTCTTTTCATCCCCTTGATTCTATTTATTAGGTTGAATCCATCATTTCCGGGAGA  
CTGATGTATGGTTCACTTTTGCTTCTGTAAGTGCCAAATGGAAGTCTCCTCTTCCAGCACAAA  
GATCTGCGACTGTGTCTTTTTCAGTCAAAAACCTGTGAACCTGCAGACACTTTATAACTCCTT  
TTGCCGCAGGGTATATGTCAGATTTGGTGGGAGATGAAAGGTTTTCAACGGTACAAGACAAC  
GCACAAATGTATTCAAATGCCTTGATTGCGGCGACACATGCATCCTGATCTTTCAAGTCGTA  
CATATCAATACCGAAAGAATAGTAATTGACCAAACCATAAACTTTTGATTCATCCTTCTCGA  
TATATGAAGATCTCTCTGTTTTAAATAATCATAAAGTTTATATTGCTCAAAAACCTTATGAT  
TTAGTTCCATCGATATTTTCATCTGAGCACTTTTCAACTCAATGACCGTATAAGACATAGTCG  
GAAATCCATAAATCAGGATTTGAGAGATAGCCCTGTCCTTTATGTGAATATGATGAGTTCGG  
TTAATATTGCTTTAAAGCAACGAACACTATTGATCTTGGTGGCGACTGTATTTATATGCAAC  
GTACTTTTGCCATTATTTGTCTTGAGTGTGTATATGAGGCCACAAGCAATGATAAAAAGTCTC  
AATAAATTGTGTCTATAATCCATGGAAAAACCTTTGTAGTCATTTCCCTTAGACCACACTCTT  
CCCTGACTGTCATGTTTAAAGAGTTCTTTGTATAACAATCCTCTTATCATGGAAGCACTTGGT  
GACTCTCTTCCTATGATGTTCAATGAAGAATAGAAATCATAGAATTCTTTAAAGAATTGTTCC  
TTTGTGGTGAAGTTGTCGTAGTTTAAATAATAATTGTTTTAACACGTCATCTGATATGACTTCC  
GGTGTTATTATGTTTTGATCTGCCATGTATGAAAAGACTTGTCGAAAAGTAGTCTCTTCTGCA  
ATCAATTTGAGCTCGGATCCTGAGGCAAATGATATAAACTCTTCTTCATTGTCTGGTTTCGAA

GACAAAAATTGAGAATATGCTTTGTATAATGTCCTGCTTGTGTTTCATATCCTTTAAGGGTATC  
TTTGTGTTTCATCATCATCTCTTCAGCATACTCTATGCCGGTGATATTGAATGTGACATCTTTG  
ATTGATGGTATTATTGATGCATCAAATGAATAGCCTTTAAGCTCTTTAGGTCTCGGTTTTTAGA  
TAACCCAATATTATCTTGATTGTGGTCATGACGTATTGAATGTTGATGTTATTGTCCTCACCA  
TGAAAATATGATTGCATGGATTCAATCCCATTGAATTCATATCGACCAGACCAATAATGAGA  
AGTTAAATCTCCGGTCCTGGATTTAAATCCGCCTGAATTAGCTCTGTGAAAATATCTGCCTCC  
AACGGGAGAAACAACACCTGATTCTAGATCTGTGTACCGGGCATCGGTGAACGTTGAAAGA  
GTCATATCACATACTGAGATTAATGAAGTCGCTTCAAGCTTAGAGACTTTGGAGAATTTGTT  
TAGCTCCATCAAAATCCACTTGGTATATCTCACTATTTCCAGAGCTTGGAATACTAATTTGGA  
CTGAAACATACCTGCGATTCTGCCTGTCGATCAAATTTGGGTGCATTAACTGCAGTCTTCAT  
TGGTGGAAGTTTCTTTGGCCCTGTTTTGGTCATAGTTTCAGGTCCCCTCATAATTACACTGAA  
GAGGTCAAAACCAGGTCTTATTTGATAGCACCAAGTGTTGGTATTTCTTCGATTTTCAAGA  
ATGACATTTCAACCTCTTCTAATTGTATCCTCTTTTTATTCACTGTATGGAAAGTGATTTTCTT  
GATTTTGTCCCGGTATAGAACAAGGTCATGATAGTTCATTGTATTGTGTTCTCCAAATTCCAT  
TTGCAGGTTGTGATTGGACTTCCAAGCCTTATTCCAGATTTTGGTATGCAATCTTTTGCCGAT  
CATCATTAGAAATGTTGAAGTGTTATCGACTTTGTTGCAAAGATTGGTGATGAAACTGAATA  
CAGATTCTTCAAAATACTTACTTGCTATTCTATTTGACATGCAATACTTGAAAGAGTGAACA  
AGTCTTAGCATCATTTCTTCTTCATCTTTTCTGTTGTCTGCATTAAACAAATCTTTCAAATCCT  
TGTTTTTGATGAATTTTGGTAAATGCTGTCTAAGCATGTCTTTCAGCATTGTTCCAGTATCAA  
ATCGACCACCAGTTAAGGGAAACGCGAGCTCACATACCTGGTTGCTTCATCAGATAGCTTA  
ATAAGTCTTCCAATCTGTTACGTAGATTGTCATTCAAGAAAGATCGAACGTAGGTTATTCTT  
TTTATTCCTGATATAGAAAAACCACTCGTCACAGAATCAGGAATGGATGACAGTGAAAAAC  
CGTACATTGTGTAAGGGAGATAAAAAAAGGCCAAAAAAGAGATAAGAGATCTTCATTCTT  
GAGATGCATGTGAATAAATAAGAGGTCGTACATTTCCAGTTTAGGAAACTTGCCCCAATTTG  
TCAAATCTTCGTCAGATTGATCATCGACATAAATTCATCAAGTTGCATCTCTTTTAATCCAC  
CTTTCACCTTATCGAATCGATGTCGGTATAGACCTGCAAATCGGGAGTCCATGTTCCACTCCA  
ACTGCATAGATAATTGTATCAAATCTTTAAAGATCACAGTGAGGGCACGATAGTTTCTCAGT  
CTTACTTGAAGCATGTGATTGTCAGATTTTTTACATGCTGCTGTGAATCCTGAATCTATTAAT  
TTTACACATTGAGATTATCACCCCACAAGCGAGAACTGTTCTGGCTGATACCCATCATTTTC  
TTGTAATTGTGCTCAATCGGATTATCTCTCACGTAATGGACCTTTAGCATGCTGCAGCGAGA  
ATTCGTAACCTGTGTTTGTGATAACTTAACTATCAATCCATTCTCATGCTAAAATTTTGAAT  
GTCTTCAACCATGCTATCTAATTTTTGAGGGGTGGCATCTTTCATTATGAACACAGCACATGA  
GTCATCACTGTAAGTGGTTGCAATCTGACGATTTATCTTGAAGTCAGACAACATTGCTTCAA  
GCATAAGCTGCGATTGAATTTCCACAGTGTTCCAAGCCACCCTTCAATAGCACCTTTCTGCC  
CGTGAGAATGGTAAACGTTATCTGAATAGGTGTTTTTCAAGAAATTACCTCGATATTGTTGAAT  
GCATCTACAATCGAAACGAATCTTTGTATTCTTCAGACCCATTAAACGAAACCATAACATGTT  
AGCAATTTCTCCATGATGAAAGATGTGTTCTCTGGTCTTTGTGAAGTATTATGTCCAGAGTA  
ATCAAGGAACAATGAATAAGCATTGTCTTCTCTTAACATTGAGGACATTCTATACATGATGT  
CACGCCTTTGATCTTCAGTCATTGTCATCATCTGACCTGGCATCATTTTCATTGCTCTTTTTGC  
CATTTCCATTATCTTAGACATCCAGGTTTTGAGAGAAAAATGATGCTATGCCATAAAATCTCG

GTGCAATCTTCTGTTCCTTTTCTTCTCGACCAGTCTAACAATGATATGAGATTTGGATATAT  
TTATTTCTTTTCTGTCCCTTAATTTCCAATTTTCTCAAATTATTTTGTCTCTCAAAAGTGAAGAG  
ATCAGAGGGCTTGTCCAAGGTTTCCTTTTGAGGTAATAGATCAATTCCTTTGACTGAATTCAC  
TCCATTATCATGATAAGTATCTGTCTGCAGGCCTTGTCTATAATGCGACTCTCCAGATTCAT  
CTCATTCCCTGGTTCAAGCATCTTCCCAAGTTTTACAGTCTTGTAGTATGAAGAATCATGTGT  
GATTTGTTTGTGTGATTTCCCTCCGCTAGCCATCACATCTAGCTCGTATTGAAGATCCGCAGG  
CAACATTGTAAGTTCAGGCATTTTGTGTCTTCTTAATGTAACCTGTAACCATCTTCATTTTA  
AACATTGACCTCAGACGCTCTATGACATTTTGATCGACAGGGTGATCACGATTTGTGCGTTG  
AGTATATTTCCCTCAGCCCTTCTTCATGAGATACTTGAGCATAATGGAGAGTCTTTCCAATGCA  
AGACATCTTTACACAAGTGGATTGTGTAGATGACATAATGATCTTGTAATTTGTTCTGCATG  
TTGGGGTGATGCAGATACAGTCTCGTATATATTATCCAAGACTGGCATTCTGGAACAGGTGG  
ATTCAGATCACTGCCTAATAGACAATTTGATTCATAAAGAGAAGCCAGGGTTGCTCTCTTTT  
TGGTATTGCTGATTTTGTTCATGATAAAAGGTAATCAACAAATGGTCTCTCTTCTTTGGATG  
CATGATCTCTGATGACATTCAATGTTAATCCATGGTCTGCAAGTGTCATTAGATAGTCGATGC  
CGCTGCCAGGCATCAAGTTGGTGAAGTTCCCATCTGATATCGCTGATATCGTCCTTGACTTAT  
ACAACTCAATCTTATGACCGCCCATGATAATCATTCTTGATGAATCTGTCCATGGGGAAAA  
ACTGTTACTTCAACCCTCTTTCCTTCGGTAAATAACCCTGAGGATTCTGTTGACAAACCCTGC  
ATTTCTTGCTTGATCAATTTTCACTTTATAGTTGATTGATTCTATGAAATCAAGAACCCAT  
GCTGCCTTCAATGTTGATTCAAGTGAATCAACATTGTGATCAGTATCCAATGATATATTCCTG  
TAGTTTTGTGACAATTTGTTGGATTCAAATTGTTCAAGCCTAGCTGACATTTTCCACAGAGTA  
GATGCCTTCACTGAAGCAGTCGCAGCTGATAACAGCTGATTATAATTATCAATGACTGACCA  
TTGACTTGATATACACTCAAGATTCCATTGTTTGATAAGAGTTCTCAAGATCATTAGATCTGT  
ACGTTGCTTATTGGACCATTCTCTGGATATTTTGAAGTTTCGGAAAAGAATCGTAAATTCTC  
TTCAGAGAATGTGACAAAGGGAAAATTGATTTTATCGATTTGTTCTGGAGGGGCCTGATTAA  
CCTTGGGAGGACGAAGATCAATATCTTCAGAGAAATGATTGAACATTTGAGGGAATTCAAA  
GGTCTCTTTGTCTGGCTCAAGCCTCGCTTCACTGGACTGACTCTTAATAAGCAAATCATGAGA  
CCCTCCAAATTCTTCTGCAATCATGTATAGTGTGGATGATGATCTGAATTTGCGCCGAGGCT  
GTTCAAGATGTTGATGCAATGCTTTTTGCTTAGCTCTGCATCTTCTTCATGATCCTCGATTATA  
GGGGTTTGGTATTATTATCGGAAACATCAGAATCAGAATACTGGAATTGCTCATCAAGAAA  
TAGGGTATCGAGTGGAGTTAAGTTGAATCCTGTATCATTGGCGTCTGATTCATCTGCCAAG  
ACACTGACTTAAATTTCTCCATGATTTTATGTTTACATTGCTATTTTATTTAAACGATTTCTT  
ATAAAGATCACTGTGACACCGTATAAACAGTGTCTCACTTTTAAGAAAATCTGATTTTCT  
TGCGAAGTCAGATCTTCCAAGACCGTAGTGAGAGAATTAGTTAACACAAAATTAGTGTTGTA  
TTTGTCAAGATATATCTGAGTTTTGTGCACCTTGGTTACCAAACTACATGATGAGTGAAAA  
CTCGATCACTGGTTACTGATATCAGAGGTATGTATTTCAAAATTTTGTGCTGGGGTAATGGAA  
ACAGACATGACTTTTGCACATGCCTGAATATAATCTAAATTCTGTTTCAGCTTGATTGGTGCA  
TGCTGACACGGTTGGAGTATAGCCATTTGTCAAAGTATGAGTTTTGTAAAC

>Seq55 [organism=Lepidozia ophiiovirus\_tri] RNA2 genomic sequence

TAGTAAAAACCCACGAAAACCCTTGCAGGCATGGTACCGAGGGCTAAAAAGCTTGTGCGCC  
ATTGATCGTATCACCTGTGATTTTCTTAAACGAAGAACTGACAAGGTTTCATCATCACTC

AACGGTCATAAAAAACAATCCACGCGGCATCACAACACTACTGTAATTATCGGTATACTCAGAC  
CAGTCATATCCTTCATCGTCATTATAGTAATCATCGTCTGCATAAAAAACCAAACAAAACATA  
GTATCTTTCAAATTCATCCAACCTTGATATACTCACATCGACACAAGTCAACCGAATTGCACT  
GCGGTGTAACGTTACAATAGGTGAAACAGTCATGGCTGATAGACATGATGTTAGCGTCATCC  
ATAATTGTCAACTGATCTTATACAAATTTCCCTTCGTGAGCTTAGCACTGATCTTCACCTTAT  
TTTTCAGGGTGATTAACCATTCGTCGGGTAAAGTTCCATGCTTGCTATGTTGCCGGATCTGT  
GTAATGATCCAAAAGATAACAGATTGTATGTCATGTCTTCTGACTCAAAAACATCACTTAAT  
TGGGTAAACACTCCTCCTATGCTAGCATAGTACTGCTTGTCATGTATCCTGTTATTTTCTCA  
CCATTTGCTAAGGTGATTCATCTTTTCTGAAATCTTCTTGGACTGTATTACATGATGAGAT  
GCTCCAGAATCAATGTACCAGGTCGAGAAATCATGATCCTCATCATTCTCAGTGTAGTAGC  
CATCATCACGATCACTGGAGGTGCCATTTGTGGTTTTTCTTCATGGTGAGGTTCCATGTAATG  
ACTGTTGGTAATTCTGGGGACACCTTCTGGGTCTTTTATTCCATCAAACCTGAACCGTGATTG  
CTGTTTTTGGAATTCATTGTTCTGTTCAATTATCTGTCTTTTTGCACGTTCTTCTCTTTTTTA  
GCTCGTCTTCTGTTCTGCTTTGATTGCTTGCAGTACATTTTTGTAGTTGAGATCTTTTGGCAC  
TTGGCAGTCTTCCAAGTAATAACCAATTGGTTCACGAGTTACTCGAGTAAAGGCCTGTGAAC  
CCGATTCAAGCTTAAAGAACAGGAATAGCATGCCGTAATCTCGACCTTGCACTGGAATGTTG  
GAAGCTTCTGCGTTTATCTGAATGTTCTGAGCATCTTCTGTTTGATGAAATAATTCATGGAT  
AATTGGAATCTGCACATGTATGATGCATTCAAGGAAACAGTTTGAAGCAATTGTCTTTTTTG  
AGGACACAGTGAAACGTCTCTCAGGCTCAATTTCAGTTTAGGCTCTCGAGTTTCTTCAAAC  
CGGCTGATTGTCGAGGGAACATGGGAAGATATATTCCATCAACGGCATGAAAACATAACAAA  
TTGGTTTCCACTTACTCCAGGAAGACTTTGTTTGACCGTGTTCCATGCCTTCTGGAGATTACC  
GATTTTCAAGGTCTTGTTTTCTCGTAGGTCCGTGAGCTTCATCGACATGACATGGCTGCTAGA  
ATAAACCGTGTTTCGCTGTGAGATTTGCGAAATCTTGCACCATATCAGTGATCCCTTGTTCTC  
AAGCTCTGGGTCACTTAAAGTCATGAATCCCTGAAACCCGGAATCTAGCAATTCCTCTGTCC  
CTTCTCAAATCCAACATGTGCAGTGATCTCCTTTGTTCCGTTGTACTGTTTTCTTTACCAAT  
CATATCGAAAACAGGCTTCCTCAGAGATTCAGAGCGATCCAACCCTCTTGAACCTCATGCCAG  
ATAGATCCATTGCCAAGAGTGATTTTGTGATCAAAGCACTGACTGCAACTTTGATTCACTTG  
CTGTATCAAGATTCTCGATGATCTCTTGTTCACCTTAAGTTTGTGTGATTACATTAGT

>Seq56 [organism=Lepidozia ophiavirus\_tri] RNA3 genomic sequence

AAATCACAAGTGATCACGGGATCATTATATGATAAAATTAACCTTCCGTCAAGGCTTTTAT  
TAAAGCGAACACTTGAAAAAGTCATCCACATCGAGTTGTTCAATCAAACACTTGTTGACCG  
TCTCGCGTGTTAACCCCATGAAGTTCCATTCTCATCGTTGAGAATCGGCCAAGTTCGCTGAT  
TGAGAGCATCATAAGACCCCATGATATTCTTATCCTTCAGGAACGATCGCATGTCCTTGTCTC  
GAAATGCTTTACCAAAGCTAATCTCCCACTCTCAGTCAAACCTGTGAAGAATAGCAGAGGTC  
ATCTTCATCGTGAAGCCAACCGGAACGCTCTTGTTTCGGATTGAGAGGGTGTAATTTAACTG  
AGCTTGAAAATTTCCACTTCTTGAGCGAAGAGCATCCACCAATTCATGAGCTTTAACGATTTT  
TTGGTGATTCGCCAATTCATCCGCTGATAACTTATCATTTGCATCAACCTTTGATGAAGATTG  
TTCAAACAAAGATGCGTGCTCAGCGTACTTAACCACGCGATTCCCTGCTACTGCAAGTTTCA  
TTCTCGATACATACTGTGATGGAAGTCCATCAATATTGACATTGAGCAGAGACCGAGCAGGA  
AATTTGCGGGTAGTAGTACAAGAGAGCAATTGAGCGACTTCAGACTCAGTAGTCATTTTCATC

ATGAAACAAATTTTCTCGGAGAAGCTTGATCAAAGGCTTTTGATTGTTCATCCCCAGAAT  
ATGTAGGCATGTTACCTCTGTTGTAGATCAGAACAAGAGCGGCGATAAAAGCCTTTCTTGCA  
TAATCAACAGCAGCAGAGACTTCCTCCATACTGATCTCGTCTATTTCTTCAACATTGAACATA  
TATAAAGCTGATTGATCTTCATGATAGGATGAATATAACACTGCATCCAGAATAACGTGCC  
AGCAGCTACCAAATTGTGCACTGATACTTTAGCACCTTTAATACTCTCACATGAACCTCTCC  
CATGTTATATTTCTCATCTTCTGGTATTGTTTGAGCAAATTCATTCATTTTTTCCACCAAGGTT  
TTAATTTCCATCTTGAATGCCGATGATGCAAGCATTGCTTCGATGTTTCGAGCGGTTACCATG  
GATCCAGAACTTTGTCCCTTTTCTGGCTTCCCCATTCTGGTGACAAAGGTTTTTACGGTACTC  
TCTTGATCCTTCTTCGGAGAAGTAGAGCGCTGGGCAATAGTTTCAGAAATCTTTTCAAGCTTT  
GACTGAGCCTGTCCGGTCGGCAAGATTCGACAGTTCCTCAAGCCAGTGTTTCGGATCAGTTT  
TCCTTTGTTGTCTATTGTCACAGATATGTCTCCATATGCCGAAATCAAGTCGTTGAGCTCCTT  
TTTCTTCTCCGGCTTGATACTGTCGTCATTTTTTCAGCATACCGAACTGCTTCAGGATTTCTTC  
TCCCCATCAGTAGCTTCGCCCTGGGACAATGAGCGAAGAGTCTTGATGAGAATTCCAGACTG  
AATAGAGCCGGCCATTTCTCACAGTAGAAAGTTTCTTTTGTGTAAATCACAAGTGATCACGG  
TGATAACTTTAAGTTTG

>Seq57 [organism=Lepidozia ophiavirus\_pli] RNA1 genomic sequence

TTAAAACTGTTCAATTTTATCAGCACCGCTGTTAACCGTGTAAGTGCAGTTGAAAAA  
GTGCAATCCAGTTTCAGGATCATACTTACCAATCTTCGTCAAATCCATTCCATCATCTTCGA  
ATTCTCATATTTAGTGCCATATTCCTTGCCCTTTCCAAATTTTGCAATCGCTCCTGTTCTTC  
GTCCTTGAATTCATCATATGTTGTTGTCAACATATAAGATTGTTCAATCTCTTGATTTTTCTTC  
ACGTTTTTCATCCCAATCCTTAAATAACCCTTTGATAAAGGCATCTGTTTTGATAGGTTTCATCT  
ATTGTAATTTGTTCTACATTTTTATCCAGGTCCATTGAATTAATAAAATTAAAGAAATTATCA  
TTGTCTGCATTCGATGCTTCAATAAATCTTGAATAGTTTTAACTGCGCATAGTGCTCTCTG  
AATTTTTGCAGATCTTCATCATTTCATCCTTCAGCTTTAACTTCCGTTTTCCAAATATCCTTCA  
CAAAAGACTCGAGATCTTGATTGTTTGCTGTTATGTTGATGTCTGTGACTTTCTTGACAATGC  
GATTAATCCTGTTTAAAGATTAATTTGTAATTAATGATATTGTTTCTATTGTTTTTCGTCTTCAC  
TCTCATGATGGTGCTGAGATTTACCCTTTCAAGACCTGAGATAGCTATGAGACCCTCTTTGGT  
TCTTCCGGACTTCCAAGAGTTTATTACCTGAGTCGTGGTTGTAAACAGATTATCAATGGTTCT  
TCCGACACCTGAATTACGTAGAGATTCAATGGATATCATAGGAATGATATCATCAGAACTGA  
TCTTATCATAATCCTTTGCTAGGTCTAACAAAAACATCCATAAATCCTTTGTAATCGGTAATG  
TATTCTGATCTTGTATATGTTGAACAACCATAGTTAGATCAGAGAATTCATCTCTTCAAATC  
CTGTTATTACAATCTTTGGCAAATATCCGCTTTCTCATTTATCACTTCTAATCTAGTTTCTCC  
TGTCTTCTATAATGCTTCATACAAGATACAAATGAACCAAATCCAATGTCAAGATCAGATG  
TGATGTAGTCAAGGTATTAGTTTTAATTCCGGGTATGTGTTGCAAACCCTCAGCACTTGTGC  
AGAGTAATGCTCTTATGTCATCAGAATTCCTTACATTGTTTTTAAGGGACTGAGGAACCTCA  
ACAATCGAGTCCTGGGTGTGACTCATCAATGAATCTAACAATTCATCATCTGTTATGAATTCT  
TCTGTATGATCAACAACGTCTTTCCCAATATGACTCAGCATGGGTTTATGTAGGAAGCCTAT  
GTTTCCTTGTGACAAGTATTCTAATATCAGGTTACCAGCAAATCCTTTATTGCTACGCTTTCT  
GGAAACAATCTTTCCTTCCTTTTCTTTTGCTTCCAGTGTGAGGTACAAGACTCCACTGCTGTT  
CTTTCTGGTATTAAGAGTTCAATGTTGCAGTGTTGACCCATGACATCAATCAGTTTTTGAGT

TATGATTGATGATACTGCATTCCACCTGAGAACAATCTTTTTCTTGATTGCAATCATTTCTGA  
TATGCCTTTAGTTAGCAGGTCCTTCTTTCCGGTAAAGTGCGATACATCCAGAAGAATAATTG  
AGTGATCCATGTAATCCATAAAATTTCTCTGGAGAAAACATTCCAAGAAGGTTTCTTCTCTT  
TCATTCCCTTGATTCTATTTATTAGGTTGAATCCATCATTCGAGAGACTGATGTATGGTTCA  
CTTTTGCTTCCGTTAATGCTAAGTGGAAGTCTCCTCTTCCGGCACAAAGATCTGCGACTGTGT  
CCTTTTCAGTCAAAAACCTGGGAACCCTGTAGACACTTGATAACTCCTCTTGCTGCAGGGTAT  
ATGTCAGATTTGGTGGGAGATGAAAGGTTTTCAACGGTGCAAGACAATGCACAAATGTATTC  
GAAGGCCTTGATTGCAGCAACACATGCATCTTGATCTTTTAAGTCATACATATCGATACCGA  
AAGAATAATAATTGACTGAGCCATAAACTTTCGATTCATCTTTTTCAATGTATGAGGATCTCT  
CTGTTTTGAAATAATCATAAAGTTTATACTGCTCAAAAACCTTATGATTCAATTCCATCGATA  
TTTCATCTGAGCATTTTTCAACTTCAATGACCGTGTAAGACATAGTCGGGAAACCATATATC  
AAGATTTGCGAGATAGCCCTGTCCTTTATATGGATATGATGAGTTCGGTTCAATATTGCTTTA  
AAGCAACGAACACTATTGATCTTAGTAGCAACTGTGTTTATGTGCAACGTA CTCTACCATT  
GTTTGTCTTAAGTGTGTATATGAGGCCGCGAGGCAATAATAAAAAGTCTCAGTAAATTGTGTC  
TGATGTCCATGGAAAAACCTTTTGTAGTCATTTCTTTTGACCACACTCGTCCTTGACTGTCAT  
GTTTAAAGAGTTCTTTGTACAGTAATCCTCGTATCATGGAAGCACTTGGTGACTCCCTTCCTA  
TGATATTTAATGAAGAATAGAAATCATAGAATTCCTTGAAGAATTGTTCTTTTGTAGTGAAG  
TTGTCGTAGTTTAAAAGCAATTGTCTCAACACATCATCTGATATGACTTCCGGTGTTATTATG  
TTCTGATCTGCCATGTATGAAAAGACTTGTGCGAAAAGTAGTCTCTTCTGCAATCAATTTCACT  
TCGGATCCTGAAGCGAATGATATGAATTCTTCTTCATTATCTGGTTTAGAAGCCAAGAATTG  
AGAATATGCTTTGTATAATGTCTGCTGGTGTTCATGTCTTTTAGGGGTATTTAGTGTTTCAT  
CTCCATCTCTTCAGCATACTCTATACCGGTGATATTGAATGTTACATCTTTAATTGATGGTAT  
TATTGATGCATCAAATGAATACCCTTTGAGCTCTTTAGGTCGCGTTTTTCAGATAACCCAGGAT  
TATCTTGATAGTAGTCATGACGTATTGAATGTTGATGTTATTGTCTTCACCATGAAAGTAAGA  
CTGCATAGATTCAATTCCATTGAATTCATATCGACCAGACCAATAATGAGAAGTTAAATCTC  
CAGTCCTAGATTTGAAACCACCGGAATTAGCCCTGTGAAAATATCTGCCTCCAACGGGAGAG  
ACAACACCGGATTCTAGATCTGTGTATCTTGCATCAGTGAATGTCGAAAGAGTCATATCACA  
TATTGAGATTAATGAAGTTGCTTCGAGCTTAGAGACTTTAGAGAATTTGTTCAACTCCATCA  
AAATCCACTTAGTATATCGCACAATTTTCGAGAGCTTGAAAACTAATTTGGATTGAAACATA  
CCTGCGATTCTGATTGTGATCAAATTTGGGTGCATTA ACTGCAGTTTTCAATTGGAGGAAGT  
TTCTTCGGACCCGTTTTTGGTCATGGTTTCAGGTCCTCTCATAATCACACTAAAAGGTCAAAA  
CCGGGTGCTATTTCAATAGCACCGAGTGTTGGTATTTCTCAATCTTCAAGAATGACATTTCA  
ACTTCTTCTAATTGTATCCTCTTTTTATTCACTGTGCGGAATGTATATTTCTTGATCTTGTCTC  
GGTATAGAACAAGGTCATGATAGTTTATTGTGTTGTGTTCCCCGAATTCCATTTGCAAGTTGT  
GATTGGATTTCCAAGCTTTATTCCAGATTTTGGTGTGTAATCTTTTGCCGATCATCATTAGGA  
ATGTTGAAGTATTGTCAACTTTGTTGCAAAGATTGGTGATGAAGCTGAATACAGATTCCTCA  
AAATACTTACTTGCTATTCTATTTGACATGCAATACTTGAAGGAATGAACAAGTCTCAACAT  
CATTTCTTCTTCATCTTTCCTGTTGTCAGCATTAACAAAATCTTTTAAGTCTTTGTTTTTGATG  
AATTTTGGTAAATGCTGTCTGAGCATGTCTTTGAGCATGGTTCAGTGTCAAATCGACCACC  
AGTTAAGGGAAACGCAGCACTCACATACCGTGTTGCTTCATCAGATAGCTTGATAAGCCTTC

CAATCTGTTTCGCGTAGACTATCGTTCAAGAAAGATCGAACATAGGTGATCCTTTTAATTCCT  
GATATAGAAAAACCACTTGTTACAGAATCAGGAATGGATGACAATGAAAAGCCATACATTG  
TGTAGGGAAGATAAAGAAAGGCTAAAAACAGAGATAAGAGGTCTTCATTCTTAAGGTGCAG  
GTGAATAAACAGAAGGTCATACATTTCCAGTTTAGGAAATTTACCCCAATTTGTTAAATCCT  
CATCAGATTTGATTGTGGATAGAAATTCATCAAGCTGCATCTCCTTTAATCCACTTTTTACTT  
TATCGAATCGATGGCGATACAAGCCTGCAAATCGAGAATCCATGTTCCACTCCAACGCATC  
GATAATTGTATCAAATCTTTAAAAATCACAGTGAGTGCACGATAATTCCTCAGTCTTACTTG  
AAGCATGTGATTGTCAGATTTTTTACATGCTGCTGTGAAACCTGAGTCAATTAATTTACACA  
TTCGAGATTATCACCCACAGGCGAGAACTGTTTTGACTGATACCCATCATTTTCTTGTAATT  
GTGTTTCGATCGGATTATCTCTCACATAATGGACCTTAGCATACTGCAGCGAGAATTAGTTA  
CCTGTGTTTGTGATAACTTGACTATCAATCCCATTCTCATGCTGAAATTCTGAATGTCTTCAA  
CCATACTGTCTAATTTCTGAGGAGTGGCATCTTTCATTATGAACACAGCACATGAATCATCA  
CTGTAAGTGGTTGCAATCTGGCGATTTATCTTGAAATCAGATAACATTGCTTCAAGCATGAG  
CTGCGATTGAATTCCCATAGCGTTCCAGCCACCCTTCAATAGCACCTTCTGTCCATGAGA  
ATGATAAACGTTATCTGAATAAGTGTCTCGGAGATCACTTCGATGTTGTTAAATGCATCTAC  
AATCGAAACGAATTCTTTGTATTCTTCAGATCCATTAACAAAGCCGTACATGTTTGCTATCTC  
TTCCATGATGAAAGATGTGTTCTCTGGTCTTTGTGAAGTGTGTGTCCAGAATAATCAAGGA  
ACAATGAGTAAGCATTTTCTTCTTAACATTGAAGACATCCTATACATGATATCACGCCTTT  
GATCTTCAGTCATCGTCATCATCTGACCTGGCATCATTTTCATTGCTCTTTTTGCCATTTCCAT  
TATTTTTGACATCCAAGTTTTGAGAGAAAATGATGCTATCCCATAAAATCTTGGTGCTATCTT  
CTGTTCTTTTCTTCTCTACCAGTCTAACAATAGTGTGAGATTTGGATATACTGATTTCTTTC  
CTGTCCTTAATTTCCAGTTTCTCAAATTATTTTGTCTCTCAAAGTAAAGAGATCAGAGGGC  
TTGTCCAGAGCTTCTTTTTGTAGGTAATAAATCAGTTCCTTGACCGAATTCCTCCATTATCA  
TGATAAGTATCTGTCTGACAAGCCTTATCTATAATGCGACTCTCCAGATTCATCTCGTTTCT  
GGTTCAAGCATCTTACCAAGTTTCACGGTCTTGTAATATGAAGAATCATGTGTAATTTGCTTG  
TTGATTTTACCTCCGCTGGCCATAACATCTAACTCGTATTGAAGATCCGCAGGCAACATTGA  
AAGTTCAAGGCATCTTGTTGTTCTTTTTGATGTAATTTGTGACCATCTTCATTTTAAACATAGA  
CCTTAGACGCTCTATGACATTCTGATCAACAGGGTGGTCACGATTTGTACGTTGAGTGTATTT  
TCTCAACCTTCTTCATGAGATACTTGGGCATAATGGAGAGTCTTTCCAATGCAGGACATCTT  
TACACAAGTGGACTGGGTTGATGACATAATGATCTTGTAATTTGTTCTGCGTGTTGAGGTG  
ATGCAGACACAGTCTCATATATGTTATCCAAGACCGGCATTCTGGAACATATGGATTTCAAG  
TCACTACCTAATAAACAGTTTGATTCATAAAGAGAGGCCAGGGTTGCTCTCTTTTAGTATTG  
CTGATTTTGTTCATGACAAAAGGTAATCAACAAATGGTCTTTCTCTTTAGATGCATGGTCT  
CTGATAACATTCAATGTTAATCCATGATCCGCAAGTGTGATAAGATAGTCGATACCACTGCC  
AGGCATCAGATTGGTGAAATTTCCATCTGATATCGCTGATATCGTCCTTGACTTATACAACCT  
AATCTTGTGACCGCCCATGACAATCATTCTTGATGAATCTGCCCATGAGGGAAAACCTGTTA  
CCTCGACCTCTTTCCTTCGGTGAAGAGCCCTGAGGATTCTGTTGGCAAACCTTGCAATTTCT  
TGCTTGATCAATCTTTACTTTATAATTGATTGATTCTATGAAATCAAGAACCCATGCGGCCT  
TCAATGTTGTTTCAGTGAGATCTATATTGTGATCAATGTCCAATGATATATTCCTGTAGTTTT  
GTGACAATTTATTGGACTCAAATTGCTCAAGCCTAGCTGACATCTTCCACAGGGTAGATGCT



TTTACTGAAGCAGTTGCAGATGACAAAAGCTGATTATAGTTGTCAATGACTGACCATTGACT  
TGATATACTCAAGATTCCATTGTTTAATGAGCGTTCTCAAGATCATTAGATCTGTGCGTTG  
CTTATTGGACCATTTCTCCGGATATTTTGAAGTTTCAGAGAAGAACTTCAAATTCTCTTCAGA  
GAATGTGACAAAAGGGAAATTGATTTTATCGATTTGTTCTGGAGGAGCTTGGTTGACTTTAG  
GAGGACGAAGATCAATATCCTCAGAGAAATGATTGAACATTTGAGGGAATTCGAAGGTTTC  
TTTATCTGGCTCAAGCCTCGCTTCATTGGACTGGCTCTTAATAAGCAAATCATGAGACCCTCC  
AAACTCTTCTGCTATCATGTACAGTGTGGATGATGATCTGAATTTGCGCCGAGGTTGTTTCA  
ATATTCAATACAGTGCTTCTTGCTTAGCTCTGCATCTTCTTCATGCTCTTCGATTAATGGGGA  
TTGATATTCAATTATCTGAAGCATCAGAATCGGAATACTGGAATTGCTCGTCAAGAAAGAGAG  
TATCAAGTGGGGTTAAGTTGAATCCTGTTTCATTATCATCTGACTCATCTGCCCAAGACACTG  
ATTTCAATTTCTCCATGATTTTGTGTTACATTGCTTTTTTATTTAAAACGATTTCTTATAAAC  
TTCCTGTGATACCATATAAACAGTATCATCAACTTTTAGGAAAATTTGATTTTCTGTGAGG  
TTAGATCTTCCAAGACTGTAGTTAGAGAGTTAGTTAACACAAAATTAGTGTTATATTTATTAA  
GGTATATCTGAGTTTTGTGAACCTTAGTTACCAAAACCACGTGATGAGTGACAACCCGATCA  
CTGGTCATTGATATTAGAGGGATGTATTTTAAAATTTTGTGTTGGGTAATGGAAACAGACAT  
GACTTTTGCACATGTCTGAATATATTCTAAATTCTGTTTCATCTTGATCGGTGTATGCTGACA  
CGGTTGGAGTATAGCCATTTGTCA

>Seq58 [organism=Lepidozia ophiavirus\_pli] RNA2 genomic sequence

AAGCCAACCAAAATGCACTGCGGTGTAACGTTACAATAGGTAAAACAGTCATGGCTGATAG  
ACATGATGTTTGCATCCATAATTGTCAACTGATCTTATACAGATTTCTTTTCGTGAGTTT  
AGCACTGATCTTCACTTTATTTTTCAGGGTTATTAACCATTTCTGTCGGGTAAAGCTCCATGCT  
TGCTATGTTGCCAGACCTGTGCAGTGATCCAAAAGACAACAAATTGTATGTCATTTCTTCTG  
ACTCAAAGACATCACTCAATTGGGTAGCACTCCTCCTATGCTGGCATAGTATTGTTTGTGCA  
TGTATCCAGTTATTTTCTCGCCATTTGCTAATGTGATTTCTGCTTTTCCAGAAATCTTCTTGA  
CTGTATCACATGATGAGATGCTCCTGAATCGATGTACCAGGTTGAGAAGTCATGCTCCTCGT  
CATTTTTCAGTGTTAGTATGCCATCATCACAATAACTGGAGGAGCCATTTGGGGTTTGTCTTCAT  
GATGAGGCTCCATGTAATGTGTATTAGTGATTCTGGGAACACCTTCTGGATCCCTGATTCCCT  
CAAATTTGAACCGTGATTGTTGTTTTTGAACCTCATTATTTCTGTTTATTATTGCTTTTTTGC  
TCGTTCTTCTTTTCTTCAAGTTTCTTCTGTTTCTGCTTTGATTGCTTGCAGAACATTCTTGT  
AGTTAAGATCTTTAGGCACTTGACAGTCTTCAAGGTAATAACCAATTGGTTCACGAGTCACT  
CGAGTAAATGCCTGTGATCCTGATTCAAGCTTGAAAAACAGGAATAGCATGCCGTAATCTCG  
ACCTTGTAAGTGGGATGTTGGAGGCTTCTGCGTTGATTTGAATGTTCTGTGCATCTTTCTGCTT  
GATGAAATAATTCATAGATAGTTGGAATCTGCACATGTATGATGCATTCAAAGAAACGGTCT  
GAAGCAATTGTCTTTTTTGGAGACACAATGAAACGTCTCTCAAGCTCAATTTCAAGTTTGGGCT  
CTCGAGTTTCTTCAAACCGGCTGACTGACGAGGGAACATGGGAAGATATACCCCATCGAC  
AGCATGAAAGCTAACAACTGATTTCCACTCACTCCAGGAAGACTTTGTTTAAACCGTATTCC  
ATGCTTTCTGGAGATTGCCAATTTTCAAGGTTTTGTTTTCTCGTAAGTCAGTGAGCTTCATCG  
ACATAACATGGCTGCTAGAATAAACTGTGTTTGCAGTGAGATTGCGAAATCCTGCACCATA  
TCAGTGATTCTTGTCTTCAAGCTCGGGATCACTTAAAGTCATGAATCCCTGAAACCCGGA  
ATCTAGCAACTCCTCTGTTCTTTCTCAAATCCAACATGTGCAGTGATCTTTTGTCCCGTTG

TACTGTTTTCTTTACTAATCATATCGAAAACAGGCTTTCGCAGGGATTTCGGCGCGATCCAAC  
CCTCGTGATTCCATACCAGATAGATCCATTGCCAAGAGTGATTTTGTGATCAAAG

>Seq59 [organism=Lepidozia ophiiovirus\_pli] RNA3 genomic sequence

TGAAAATGGATCATTATATGATAAAATTAACCTTCCGTCAAGGCTTTTATTAAAGCGAACA  
CTTGAAAAAGTCATCCACATCGAATTGTTTCAGTCAAAACACTTGTTAACCGTCTCGCGTGTT  
AACCCCATGAAGTTTCCATTTTCATCATTGAGTATCGGCCAAGTTCGCTGATTGAGAGCATC  
ATAAGAACCCATGATATTCTTGTCTTCAAGAACGACCGCATGTCCTTGTCTGAAAATGTTT  
TACCAAAGCTAATCTTCCATTCTCAGTCAGACTGTGTAAAATAGCAGAGGTCATCTTCATCG  
TGAAGCCAACCGGAACGCTCTTGTTTCGGATTCAAAGGGTGTAATTTTAACTGAGCTTGAAAA  
TTTCCACTTCTTGAGCGAAGAGCATCCACCAGTTCATGAGCTTTAACAATCTTTTGATGACTT  
GCTAACTCATCTGCGGACAATTTGTCATTTGCGTCAATCTTTGATGAAGATTGTTCAAACAAA  
GATGCATGTTTCAGCGTACTTAACCACACGATTACCTGCAACTGCAAGTTTCATTCTCGAGAC  
ATACTGCGATGGAAGACCATCAATATTGACATTAAGCAGAGACCGAGCTGGAAACTTGCGG  
GTTGTAGTGCAAGAAAGCAATTGTGCTACTTCAGATTCAGTAGTCATTTTCATCATGAAACAA  
ATTTTCTCGGAGAAGTTTGATCAAGGGCTTTTGATTTGTTTCATCTCCAGAATATGTGGGCAT  
GTTACCTCTGTTGTATATCAGAACAAGAACAGCGATAAAAGCCTTTCGAGCGTAATCAACTG  
AAGCAGAGACCTCTTCCATACTGATTTTCATCTATCTCTTCTACATTGAACATATATAAAGCTG  
ATTGATCTTCATGATAAGATGAATACAACGCGGCATCCAGAACTAACGTACCAGCAGCAAC  
CAAGTTGTGCACTGAACTTTGGCACCTTCAACACTCTCACATGAACTTCCCCCATGTTGTA  
TTTCTCATCTTCTGGTATTGTCTGAGCGAACTCATTCAATTTCTCCACCAAGGTTTTAATTTCC  
ATCTTGAATGCCGATGATGCAAGCATTGCTTCGATGTTTCGCAGCGGTTACCATGGATCCAGA  
ATTTTGTCCCTTCTCTGGCTTTCCCATTTCTAGTGACCAAGGTCTTCACGGTACTCTCGTGATCT  
TTCTTCGGAGAAGTAGAGCGCTGAGCAATAGTTTCAGAAATCTTCTCAAGCTTTGACTGAGC  
CTGTCCAGTCGGCAAGATTTTCGACAGTTCCTAAACCTGTGTTTCGAATCAGTTTTCCCTTGTT  
GTCTATTGTCACAGATATGTCTCCATATGCAGAGATTAAGTCGTTGAGTTCTTTCTTCTTTTCC  
GGCTTGATACTGTCATCGTTTTTCAACATACCGAACTGCTTCAGGATTTCCCTTCTCCCCATCA  
GTAGCTTCGCCCTGGGACAATGAGCGAAGAGTCTTGATGAGAATTCCAGACTGAATAGAGC  
CGGCCATTTCTCACAGTGGAATAATTTCTTTTGAGTAAATCACAAGTGATCACGGTG

>Seq60 [organism=Lepidozia ophiiovirus\_sela] RNA1 genomic sequence

GTTTATATCAGCACGACTGATATTCATGCCAATATAGCACTTGAAAAAGTGCAATCCAGTAT  
CAGGATCATACTACCAATCTTCATCGTAATCCATGCCATCATCATCGAAGTCACCGTACGC  
TGATGCAATATTTTTAGCCCTCTCAAAGTCTGCTATTCTTACCTGTTTCATCATCTTGGAATTCT  
TCATATGTTGTTGTTAATGTGTAAGACTGTTCAATCTCCATATTCTTTTGACATTTTCATCCC  
AGTCTGCAAATAATCCTTTTATAAACATATCAGTTTTCTTCGGTGTCATCAAAACATACCTCTT  
CTGTGGTTTTGTCAAGACTCATTGAATTTATAAAATTGAAAAAATTATCATCGTCTGTGTTTG  
CTGCTTCGATGAAATCTTTCATAGTCTTAAATTGAGAATAATGTTCTCTGAATCTTTGTAAGT  
CCTCATCATTCAATCTTCCAGTTTTTCGTCTCTGTCTTCATATTTCTCTAACAAAGCTTTCAAG  
ATCTTGATTATTTGACGTAATTCTTATATCAGTGACCTTCTTGACTATCCTATTTATTCGATTA  
AGAATTAACCTGTAATTTATGATATTATCCTATTGTTTTTGTCTTCACTCTCATTATAGTGC  
TGAGATTGACTCTCTCCAAACCAGATATAGCGATTAAACCCTCCTTTGTTCTGCCAGATTTCC

AAGAATTAATGACCTGTGCTGTGGTGGTGAAAAGGTTGTCAATTGTCCTGCCTATACCAGAA  
TTGCGTAGTGACTCAATCGAAATCATAGGTATTATGTCATCGGAATTGACTTTATCACAATCT  
TTTGCCAAATCCAACAAGAACATCCACAAATCTTTAGTCACTGGAAGCGTATTTTGATCTTG  
CACGTGTTGGACTATTAAAGTTAGATCGGAGAACTTGATTCCTTCAAACCCAGTTACCACTA  
ATTTTGGTAAACTATCGGCTTTCTCATTGATTACCTCTAATCTTGTTTCTCCAGTTCTGCCATA  
ATGTCTCATACACGAAAGAAATGATCCGAAACCCATATCTAAATCAGATGTGATGTATTCAA  
AATATTCCGTTTTAATACCAGGTATATCCTGAATCCCTCTGCACTGGTACATAACAATGCTC  
GTATATCATCAGAATTTCTGACGTTATTTTTAAGTGACTGAGGAACTTCTACGATTGAGTCAG  
GAATGTGACTCATTAAAGAATCAAGTAATTCATCGTCTGTAATGAATTCTTCTGTATGATCA  
ACGACATTCTTACCCACATGACTCAACATAGGCTTGTGTAGAAAACCTATATTGCCTTGAGA  
TAGATATTCTAAGATTAGATTGCCTGAAAATCCTTTATTGTTACGTTTTCGAGATACAAGAAT  
GTCTTCAGCAGCCTTTGGAGCAAGTGTCAAGTAAAGAACTCCACTGCTGTTTTTCTCCGGAA  
TCAGAATGTTTATTTTGCAATGTTGTCCCATGACATCTATAAGTTTTGGAGATAATATAGAGG  
AGATAGCATTCCAGCGCAAGATGATTTTCTTCTTAATGGCAATCATCTCAGATATTCCTTTAG  
TGAGTAGATCTTTCTTTCCGGTAAAATGAGATACATCAAGCAATATGATTGAATGATTCATA  
TAGTCCATGAAGTTATCTCTGGAAAAAGCATTCCATGAAGGCTTCTTTTCTTCATCCCTTTA  
ATCCTGTTTATTAAATTGAAACCATCATTGCGTGACACGGAAACGTGTTCAATAGAATTCTCT  
GTCAGAGCGATGTGATAATCACCTCTTCCGGCGCAAAGGTCAGCAATAGTATCTTTATCTGA  
TATAAACTGTGAACCTTGAGGCAATTGATCACTCCCAGTGCTGCGGGGTATATATCAGACT  
TCGTCGGGGATGATAAGTTCTCTACGGAACAAGAGAGTGCGCAAATGTATTGCAAAGCCTTT  
ATTGCTGCAATACAGGCATCTTGATCTTTCAAATCGTCTTTTGTATGTTGTGAGAATAGTAA  
CTGACAATTCCATAATCCTTCGTTTCATCTTTTTCGATATATGAGGATCTCTCCATCTTGAAGT  
AATCATAAAGCTTATATTGTTCAAACACTTTATGATTAAGCTCCATTGATACTTCATCAGAAC  
ACTTCTCAACTTCATTCACTGTGTAAGACATTGTTGGAAAACCGTAAATGAGAATTTGGGAT  
ATTGCTCTGTCCTTTATATGAATATGATGTGTTCTATTGAGAATTGCCTTGAAACATCTAACA  
CTATTGATTTTAGTTGCAATGGTATTGACATGAAGTGTAATCTTTCCATTATTTGTCTTCAAG  
GTGTATATGAGCCCACAAGCTATTATGAAAAGACGGAGAAGATTGTGTCGATAATCCATTGA  
AAATCCTTTAGTCGTAATCTCTTTGGACCATACTCTCCCTTGACTATCATGTTTAAATAATTCT  
TTATATAATAGCCCTCGTATCATCGAAGCACTTGGAGATTCTCTCCAATAATGTTGAGCGAT  
GAATAAAATTCAATAAACTCCTTGAAAACTTCTCTTTAGTAGTAAATTTTCGTAATTTACG  
AGCAATTGTTGAAGGACATCATCTGAGATGACTTCAGGAGTGATTATATTCTGATCGGCCAT  
GTATGAAAATACTTGTGCGGAAGGTGGTCTCCTCTGCAATAAGTTTCAATTCTGATCCAGACG  
CGAACGATATGAAGTCGTCTTCACTATTTGGTTTTGATGATAAGAATTGTGAATATGCTTTGT  
ATAGAGTTGTACTTGTGTTTCATATCCCTGAGAGGAATTTTATTGTTTCATGACCATTTTCATCAG  
CAAAGTCTATTCTGTCAAGTTGAAAGTAACGTCCCTGATAGCTGGGATGATGGAAGTATCA  
AATGAATAACCTTTCAATTCTCTTGGTCTTGTCTTCAAGTAACCCAGTATGATTTTAATTGTC  
GTCATTACATATTGAATATTAATGTTGTTATCCTCACCATGGAAGTAGGACTGCATAGAATCT  
ATACCATTAAATTCATATCTACCAGACCAATAATGTGAAGTTAAATCACCTGTTCTTGATTTA  
AATCCACCGGAGCTTGCTCGGTGAAAATATCTACCTCCCACAGGGGAAACAACCCCTGATTC  
AAGATCCTTGTAACGTGCATCAGTGAAGGTTGATAATGTAAGATTGCAAACGGAAATCAAA

GCATTTGCTTCAAGCGTAGAAACAGAAGAGAACTTATTCAACTCCATCAAAATCCATTTTGT  
GTATCTTACAATCTCAAGTGCTTGGAATACTAGCTTGGACTGGAACATGCCTGCAATTCCTG  
CTTGACGATCAAACCTGCGGGCATTATTGCAGTTTTTCATAGGTGGTAATTTTTTGGGTCCTG  
TTTTTGTTCATGGTCTCGGGTCCTCTCATTATAACACTGAAGAGATCGAAACCTGGACGTATTT  
CAATCGCTCCGAGAGTAGGAATTTCTTCAATTTTGAGAAAAGACATTTCAACTTCCTCTAATT  
GGATTTTCCTTCGGCTGTCCTGACGATATAGAAATTTCTTCACATTATCACGATACACAAGAA  
TGTCATTGTAATCCATTGACGAATGATTTCCAAATTCAGCTTCAGGTTATGATTTGATTTCC  
AAGCTTTGTTCCAGATTTTGGCATGAAGATATTTCCCAATCATCATCAAAAAGGTGGATGTA  
TTGTCAACCTTGTTACAAAGATTGGTGATGAAACTGAAAACAGATTCCTCAAAGTATTTGCT  
TGCTATTCTGTTTGACATACAATACTTGAAAGAGTGAAGTAGACTGTTTCATCATGCTCTCTTC  
ATCACGGCGGTTGTCAGCATCAAAGAGCTCCTTAAGTTCTCTATTTTAAATGAATTTAGGAA  
GATGTTGTCGTAATAGATCTTTCAAGAGCGTGCCTGTGTCAAAGCGTCCTCCTGTGAGTGGA  
AAAGCAGCACTTACATACCTGGTGGCTTCATCTGAAAGTTTAAATCAGTTTGCCAATTTGGGC  
ACGAATGTTGAGATTTAAGAACGATCTAACATATGTAATTCGCTTGATTCCCGAAATTGAAA  
AACCGCTAGTCACAGAATCTGGAATTGATGATAGGGGAAAATCCATACATTGTGTAAGGTAA  
ATATAGGAATGCAAGGAATATAGATATAAGATCTTCATTATCCATATGCAGATGAATGAATA  
ACAAATCATACATTTCTAATTTGGGAAATTTACCCAGTGTTAAATCTTCATCACTCTTGA  
TTAGGGAAGCAAATTCGTGAGTTGCATTTCTTCAAACCTCCCTTTACCTTATCAAATCTAT  
GACGATAAAGACCAGCAAATCGGGTATCCATGTTCCACTCCAATTGAAGAGACAAGTTTATC  
AAATCCTTGAACACAACCTGTTAAAGCTCGATAATTTCTTAGTCTAACTTGCAACATATGATTG  
TCAGACTTTTCACATGAAGCAGTGAACCCTGAGTCGATCAGTTTCACGCATTCTAGATTGTCC  
CCCCATAGTCTGGAGCTATTTTGACTAATCCCCATCATCTTTTTATAGTTGTGTTCAATGGGA  
TTGTCTCTCACATAATGAACCTTGAGCATGCTGCACCTTGAATTCGTCACTTGAGTTTGGGAT  
AACTTAACGATTAACCCCATCTTCATGCTGAAGTTCTGGATGTCCTCTACCATTCCATCTAGC  
TTTTGAGGCGTTGCATCCTTCATAATGAACACAGCACAGGAATCATCACTGTAAGTCGTTGC  
TATCTGACGATTTATCTTGAAGTCAGATAACATAGCTTCTAGCATAAGCTGTGATTGGATTCC  
CCACAAAGTCCCAAGCCATCCTTCTATCGCACCTTTCTGGCCATGCGAATGATAAACATTAT  
CTGAATATGTGTTTTCTGAAATAACTTCTATATTGTTGAAGGCATCAACTATAGATACAACT  
CTCGAAATTCCTCAGATTCGTTTCGAGAAACCATACATGTTAGCGATCTCTTCCATGATAAATG  
ATGTGTTTTCTGGCCTTTGTGAAGTGTTATGTCCTGAGTAATCTAGGAAGAGCGAATAGGCG  
TCTGCTTCTCTAAGCATTGAAGACATGCGATACATGATATCTCTTTGATCTTCTGTCTATG  
GTCATCATTTGTCCAGGCATCATCTTCATGGCTCGTTTAGCCATCTCCATGATCTTTGACATC  
CATGTTTTCAATGAAAAGGAAGCAATGCCATAAAACCTTGGTGCTATTTTCTGTTCTTTCTCC  
TTTTCAACCAACCTCACAAATGATATGTGATTTATTTATTAATATGTCCTTCCTGTCCTTGATTT  
CTAATGATCTTGTATTATCCAGTCTTTTGAATTTAAACAAGTCAGATGGTTTATCCAGTTTTT  
CCTTTTGAAGATAATAGATCAATTCCTTCACTGAGTTCACGCCATTATCGTGATAATTGTCTAG  
TGGTACATGCTTTATCAATAACCCTGCTTTCAAGATTCATCTCATTGCCCCGGCTCTAAGATTT  
TACCAAGTCTGACTGCCTTATAATAAGAGGCATCATGAGTGATTGCTTGTTGTACTTGCCTC  
CGCTGGACATGACATCTAGTTCATACTGTAAATCTGCTGGCACCATTGATAATTCTGGCATCT  
TATTGTTCTTCTTTATATAACTGGTGACCATCTTCATTCGAAACATGGATCTTAGTCTTTTCGAT

CACATTTTGATCGACAGGATGATCACGGTTGGTACGCTGTGTGTATTTCCGCAAGCCTTCCTC  
GTGTGATACCTGCGCGTAATGTAATGTTTTTCCTATGCAAGACATTTTACACATGTCGACTG  
AGTCGAAGACATTATGATTTGATATATCTTTTCAGCGTGATAAGGGGAAGCTGAAACAGTAT  
CATAGATATTATCGAGCACTGGCATCCGAGAACATGTGGATTTTCAGATCACTCCCTAGGAGA  
CAATTAGATTCATATAAAGAAGCAAGTGTTGCCCTTTTCTTTGTATTGCTAATCTTGTTCAAT  
GACAGTAAGTAATCCACAAAAGGCTTCTCTTCTCTTGAAGCATGATCTCTTATAATGTTTAAA  
GTGAAACCATGATCAGCCAAAGTCATAAGGTAATCTATACCACTACCCGGCATAAGATTTAT  
GAAATTACCATCGGATATCGCCGATAGAGAACGTGACTTGAATATCTCTATCTTATGTCCTC  
CCATGACAATCATTCTTGCGTGAATTTGTCCATGTGGGAACACCGTCACCTCAACTCTTTTAA  
CTTCAGTGAATAGTCCCGTTGATTCTGTAGGCAAACCTTGATGTTTTTTGCTTGCATCAATTT  
TGGCTTTATAATTGATAGATTCGATGAAGTCCAATACCCAGGCTGCTTTCAGGGTTTGCTCTG  
TCAGATCAACATTATTATCTTTGTGCGATTGATGAATTTTCGATAGTTTTGGGATAGCTTGTTGG  
ATTCAAAATTCTCCAATCTGGATGACATTTTCCAAAGTGTTGCTGACTTGAGTGAAGGAAGG  
GCAACTGTAAGTAATTGATTGTAAGTATCAATTACAGACCATTGACTCGAAATGCACTCTGT  
GTTCCAGTGCTTAATGAGAGTGCGTAGGATCATTAAATCAGTCCGCTGTTTATTAGACCATTT  
ATCAGGGTATTGTGTAGACTGCGAGAAAAATGTGAGATTATCTTCGAAAATGTAACAAATG  
GAAAATTAATTTTATCAATCTGCTCCGGAGGAACCTTGATTAACTTTCGGCACGCGTAAGTCA  
ATAAATTCAGTGAAGTGGTTGAAGGATTGTGGAACTCAAATACTTCTTTGTCTGGTTTCGAG  
TCTTGCTTCACTTGATTGACTCTTGATCAGGAGATCATGTGAGCCTCCGAACTCATCGGCGAT  
CATGTACAATGTGGGATGTAAGTCCATACTTGCTCCAAGTGAGTTCAAATGCTCAACACAGT  
GCTTCTTACTCAACTCAGAGTCTTCCTCGTGTTCTTCTATGATAGGGGTTTGGTATTCATTGTC  
GGAAACATCAGAATCGGAATACTGGAATTGCTCATCAAGGAAAAGTGTGTCTAAAGGAGGC  
ATATGAAGTGGAGCTTCCATATCTTCTGATACATCTGCCCATGATACTGACTTTAGACTCTCC  
ATGATTGTTAGTTCAAGTTTTATTTAAAGCGAAAACGATAATATTACTTCTTAACCATATAAA  
CATTGCATCCAATCTTCAAATAGATTCGATTATCTTCTGACATTAAATCATCCAGAACTGCTG  
TGAGAGAATTTGTGAGCACAAAGATTTGTATTGTAATTGTTAAGGTAAATTTGTTTCCTGTGAA  
CCTTGGTCACTAGAATAGCGTGATGGGTCATCATTCTATCTTTACCAACAGATATCATAGGT  
ATATGTTTCAAGATCTTTGCGGGAGTTATCGATGCTGACATCACTTTTGAGCATGCTTGTAGA  
TAATCCAGGCTCAGATGCAATTTGATCGGGGCATTAAGACATGGTTTTAGTATTGCCATTTTG  
TCACGTTTAAGTTTTAGTTAAGATTAATTAATTTAACTAAAAAATGTTCTGTTTATATCAGC  
ACGACTGATATTCATGCCAATATAGC

>Seq61 [organism=Lepidozia ophiiovirus\_sela] RNA2 genomic sequence

TTGTAACAAACCCACGAAAACCCTTGAAGGCATGGTACCGAGGGCTAAAAAGCTTGTCGGC  
CATTGATCGTATCACCGCGCCTTTTTTTATTAAGCGATTACTTAATCAGGTCCACAGTGTAT  
TAAAAATCATGAAAACAGTCCCATGCAGCATCCAAGCTTTCATAATTATCGGTATACTCGGA  
CCAATCATACCATTTCATCATCGCTTTCTTGATTCCATACCATCTCACCAGGAAACAACACTGC  
ATATCTAGAAAGATTGTCCAACCTGAGAAAATCACACCTACATAAGCCAACCCCGTTGCAAG  
ACGGTGTAACGTTACAATATGTGAAACAATCATGGTCAATACACATGATGTTTGCGCAGTCC  
ATAATTGTCAACTGATCTTATACAAATTGCCCTTCGTGAGCTTAGCACAGATCTTCACCTTGT  
TTTTGAGAGTGATCACCCATCCTTCTGAGTTAATCTCCATGCTATCAATATTGCCTGATCTGT

GCAATGATCCAAAAGACAGCAGATTATAAGTCATATTCTCAGATTCTGAAGACATCACTTAAC  
TGTGTCAACACACCTCCGATGCTCGCATAGTATTGCTTATGCATGTAACCTGTGATCTCTTCA  
CCATTTGCTAAGGTGATTTTGTTCATTACCTGAGATCTTCTTTGATTGTATCACATGGTGAGAA  
GCCCCAGAATCAATATACCAGGTGCGAGAAGTCATTTGGCTCTTCATTCTTGAGGGTAGTAGC  
CATCATCACAATCACTGGTGGTGCCATCTGGGGCTCCTCATCATACTTGGAACCTAGGTACG  
GAGAGTTTGTAAATCATAGGAACCCCTCCTTTGTCTTTGATTCTTCAAATTTATACCGTGATT  
GTTGTTTCTGAATTTGTTGTTTCTATCCCTGATTTGCTTCTTAGCGCGGTTTTCTCTCTTTTTTC  
AGTTCTTCTCTGTCCCTGCTCTGACAGCTTGCAAGACATTCTTATAGTTGAGATCTTTGGGA  
ATTTGACAGTCTTCTAAGTAATAACCAATCGGTTCTCTAGTCACTCTTGTGAATGCTTGAGAT  
CCCATTCTGAGCTTAAAGAATAGAAATAACATGCCGTAATCTCGTCCTTGAACAGGAATATT  
TGTTGCTTCAGCATTAACTGGATGTTCTGTGCATCTTTTGTGTTGATGAAGTAGTTCATCGA  
CAACTGGAATCGACACATGTATGATGCATTCAAGTCAATTTTAGCTTGGGCTCATGTTTCTCAGCGAAG  
TTTGCAGATTGCCTTGGGAACATTGGAAGATAAATACCATCAACCGCATGGAAGCTCACAAA  
CTGGTTGTTACTACCCCCAGGGAGACTTTGCCTGACAACATTCCAGGCTTTCTGGAGGTTTCC  
TATCTTCAAGGTGCGATTTTCTCTCAAGTCTGTAAGTTTCATGGACATTACGTGGCTGCTGGA  
ATACACTGTATTCTCGAGTAAGGTTTGCAAAATCTTGAACCATGTCGGTAATCCCTTGTTCCCTC  
GAGTTCAGGATCACTTAATGTCATGAACCCCTCTAAACCCGGATTCCAGCAACTCTTCCGTAC  
CCTTCTCAAATCCAACGTGCGAAGTGATTTCTTTTGTTCGGTTGTACTTGTTTCCCTTGCTGAT  
TACATCGAAAACAGGCTTACGAGATGATTCAGTTTTTCCATACCCAGTTGATTCCATATTTGA  
GAGATCCATGATCAATGAGTTCCCTTGATGTAGATGACGGCGTGTGAAGATGAAGCCCTGAT  
GGTGCTGAGGTCCACAATGATTACTTGTTCACTTTAAGTTTGTATAAAAACTTAT

>Seq62 [organism=Lepidozia ophiovirus\_sela] RNA3 genomic sequence

ATTGACTGAAGATTTTTCTTAAATCGAAACCGTGTAATAATTCACACAAACAATGGTCAACCG  
TCAAAACACTTGTTACAGTATCTTTCGTAAACCCCATGAAGTTGCCATTCTCATCATTGAGT  
ATAGGCCAAGTTCTGTTATTGAGCGCATCATAAGAACCCATGATATTCTTGTCCTTCAGGAA  
AGATCGCATGTCCTTGTCCTGGAAATGCTTTACCAACGCTAATCTCCCAGCCTCAGTCAAAC  
GTGAAGAATTGCCGATGTCATCTTCATAGTAAAACCAACAGGAACACTCTTGTTTCGGATTCA  
AAGGGTGTAATTTCAATTGAGCATGAAAGTTTCCACTCCTGGAGCGGAGAGCGTCAACTAGT  
TCGTGTGCCTTCACAATTTTCTGGTGAGCTGCCAATTCATCTGCTGATAACTTTGCATTTGCA  
TCGATCTTCGATGATGATTGTGCAAAGAGAGATGCATGCTCTGCATACTTGACAACCTCGATT  
ACCTGCAACTGCGAGTTTCATTTCGAGAAACATATTGAGGAGGGAGTCCATCTATATTCACAT  
CCAGGAGGGAGCGGGCAGGAAATTTCCGAGTCGTAGTGCAAGAAAGATACTTTGCTACTTC  
AGATTCAGTAGTCAATTCATCATGATATAAATTTTACGAAGTAACTTGATGAGTGTTTCTG  
GTTTGACTCATCACTTGATAGGTTGGCATACTTCCTCGGTTATAGATCAAAACAAGTGCAG  
CAATGAAAGCCTTCCTTGATGATCAACCGACACCGAGACCTCCTCCATGCTGATTTCTCG  
AGCTCTTCTATCGCAAACATATAGAGAGCAGCTTGATCTTCATGATAAGAAGAATACAGAAC  
AGCATCCAAGACAGTGTTCTGTCAGCAACCGAGGTTGTGCACGGAACTTTGGCTCCCTTCA  
AAAGGCGTATTGAAACCTCACCCATATTGTATTTTTCATCCTCGGGAATGGTTTTGGCAAATT  
CATTCATTTTCTCTACCAAGATTTTAATTTCCATCTTGAACGCCGATGAAGCAAGCATTGCTT

CAATATTCTCGGCGGTTACCATGGATCCAGAGCTTTGTCCCTTTTCGGGTTTACCCATTCTAG  
TGATTATGGGTTTCACAGTTTTTTCGCGTTCTTTTCAGGTGATGTTGTGCGTTGAGCAATAG  
TTTCAGAAATCTTCTCTAACTTTGATTGAGCTTGTCAGCCTTCATGACATCAACAGTTTCAA  
CGCCAACATTCCGTACCAGTTTTCTTTGGAATCTATCGTCACTGATATGTCACCAAAGTCCG  
AGATCAACTTCTCGAGCTCCTTTTTCTTCTCTGGTTTGATGCTGTCATCATTTTTTCAGCATGCC  
AAACTGCTTCAGGATTTCTTCTCACCATCACTCGCTTCTCCTTGGGACAATGACTTAAGAGT  
CTTGGTGAGAATACCAGATTGGATCGAGCCAGACATTTTGAGAGCTGAAAGATTCACTCTTA  
GCGATACACGCGAGCACAAAGTTGATAACTTTAAGTTTG

>Seq63 [organism=Lithospermum ophiovirus] RNA2 partial sequence

TTTCATTATTTTAACATTTATTCTGATAATATTTATTCTTATAATATTGATTATTATAATATTG  
ATTATTATAATATATTTACCTATATCACATTATACTTGATCCCAAGGCCCTGTGCTTCCTGAT  
TTTCAATTTCTTTCTTAAATGCACTATTTTTCAACCACATTCTGCCTGGTTGAGATCCATCAAA  
CTGCATGACCACAACATCATTCTTAAGCAAAAAAACATCATCTTCTTCTGTTAATATACTGTC  
TACAACTCCATCTTCCTTCAATTTTGAATATGAAATCAAATGAGATCCAAGACGTTTCATCATT  
GTAGACCCATGCTTCTTTGAAAAAGAAATCAGATTCTTCAGTGACAAAATTTACCCTTGCTTT  
TTCAGCATAAAATTTGTCTATGCCACCAAAGTTCTCCATCAAAGTTTCTTCTTTAGCATTCTT  
AAAGAAAAGGTAATGTTTCAGCTGATCCAGTGCCAACATTGTTTAAAGGTCACCAGGTAAAA  
TAGTGATTGTCCTCATACCCTTATTTGCAATCCTTCCCATCATTGCATTTCCAACCAATGAAA  
TGCTCTTTCTCCCAACTTCAATCATCTCATTTGTTATCCTCAGAACTAGAAGTCATACCATCTTT  
GATAAAGTCTATCTTTTTTCATTGTTCTTCTTGCCTCTGAATCATATTTCTTTTTCTTCTTCTCA  
ACTCCATCCTTTTGTTTTTTACCTCTTCCGAGATCTTATCCCCAAGTCCTTTAAAGACTGAATT  
TTTATTTATGTCTCGTGGGTTTTTAAGAGAATCTATGTAAATTAAAGTTGATTGTTTTTTCTCT  
AATCTCAATGGTGAATGTTCTTCATGGACAAAAAATGCAATGAAAATTGCACCGTATGCTCT  
GCCTTCCACTGGCAGTTTATCTACAGACATTTCAAGACAGATTTTTTCAATATCTTTTTTAGC  
GATAAAATGATTCATAGAAAGCTCCACAAGGGCCATTTTCGTCTGCTTCAAATGTAACAGATT  
GTATTATTGGATCATTTCCAGCAAGTTCCTTACCTTCATCAGTTAATGATACTGTCATTTTCCC  
GTGATCAGATTCTTGTCTATCAAATAGAGGAGTGACATTATTTGAATTTTTTCAAATCTCAC  
AAATGGCCTGTCCTCTGTATTCCTTGATATTTTAGAAATAATATTCTTCAGCTTCTTCAAATTT  
GTGATCTTTAGCCTTTTTCTATGATCTTCTTCTTCAAGGTGAGAGTCATCGGACTAATCACA  
GAATTGATTGTACCTTTCTGCACATTTGAGAAATCAGCTGCAATACATTCTATTCCTTCAGGT  
AAATCACCAGTTTTCGTCTTTAAGCGATATGACCCTGATTTGGTTCACATTATTCAGATCATCA  
ACAATGTTTTGAGCAGACAATTTCCCAACTCTCGTAACATCAGGATTACGAATAGATGATGA  
TTTGATAACTTCAGGAGTCTTGAAGGATGATGATGCAATCAGAG

>Seq64 [organism=Lithospermum ophiovirus] RNA3 genomic sequence

ATCGTCTTTTATTTAAAACAATAAGTTGCAATACACACACCATAATTTGTATTTTTCAACA  
ATTTATTTATTTATTCATTTATTTATTTATTTATCTAGCCATTAATAAAATGATCTTTACTATT  
ATTATTGATCATTTTATCATCATTTTCACTATCATTCTACATATTGTTTAAACTCACACCACTC  
CATAGATCCCTTTCAAAGTATTCAGTACATATCAGAAAAGTCTGCATCTGGATTGTCTAAA  
ATCCTCCATACTCGAACTCCTGCAATATCTTCTCCTGCGAAATTGGAATCATTGAGGAAAGA  
AGAATTTTTAGCACTTTCCATCTTGTTGAATAAAGATATCCTCCCTTCAACACTCAAGCTCTC

TATTATTGCTCGAGTGATTTTCAACAAAAACCCTTTCACCACAGGTTTATTTGGTGATAAGGG  
ATGCATTCTCAATTGTGCTGTAGTGTTTCCACTTAATCCTCTCATGAAATCTGATATTGCTATT  
GCCAGTTGAATCCTATTATTCATGGCTGTGAGTTTGGAACTTCTGGACCTTTCATTTCTTCAC  
CTATGATGAATAATTCCTCTTTCATGCATGTCCCTGCAAAAATTGCATACCTAATTCCTTTAT  
TCCCTGCAATGCTCAACTTGGCCCTTGTTGCAACAGGGACTGGAAATCTGTTGATATCAACA  
TTCAAGAAAACTCTTGCAGGAAATTTAGAAGTACTAGCAGATGATAGATTCTTTCCAATGGC  
ATTTAGATTACCTATATCTCCCTTATAAATGTTCTCTTTGATGAATTTTGGGACTGGTTTCTTA  
TCATCATCAAAGTTTTTCGGTAAAGATCCTTGAATATAGACCAGAACTGCAGCTGCTTGAAT  
GGCTCTTTTTGCATCTTGAACATTTTTCCCAACTGTCATGGATGTCAGATTATCCACAGCCCT  
TTCATTGAACATTCCTTGAGCTTCAGGATTATCTTTCATAGACACAAAAAGCAATGCATCTA  
ATATCTTTGTTCCAGCACCTACCAATGATTGTATTTTCATAAGTTTTTTGTTTATAATAAAAGA  
TGCTTATCTCCTTTGTCAAGTATCCTTCATCTTCCGTAGTTACAGACTCCAAGAATTTAAGAA  
GGTGTGCTTCAATAGATTTTGTGTGATCTGATAAGAATCTTCTTCACATTTTCCAAAAAAG  
AATCAATTGATTGAATTCTTCTCCTCCAACATTCATAGGAGCTTTTTCAGGATTTTATAGATA  
CTATTCCAGAATCAACTTCTTCTTTTTGTTTAGAGCTTTCAGCGCTCTTTTTATCATCTGAACT  
CTGTTTTCTTCAGGAATGAACTTTGGAAGTCCATTCATGATTTTGAATTTCCACCCTCCAT  
CTGAGTCTCCTTGTTTCATGATTCTTGCTCTATTGTCAGTGGTGCATGACCACTTCCGAAACA  
TTCAAATTCTTTCATATGTTTATCTTACTTGTTTCCATGTCTTTTTTGCTCTCATATTCTTTAC  
AGAGTGTTGCGAGTTCTTTCAGCTGATTGTCTTGATTTCAGAAGTCATTTTTAAAAATAAA  
AATCTAAGATTGCTGATTGCCAATTTTCTCAAAATCAAATTCGATCGTTGCGTAAACTAAAA  
ATATCCCCTTCAGGAATGAACTTTGGAAGTCCATTCATGATTTTGAATTTCCAC

>Seq65 [organism=Lupinus ophiovirus] RNA3 genomic sequence

GTTATATTTAATATTTAAGATGGTGAGAAAATAAAGAACAAATCTATATTAATTTTCTTTTAT  
GATTGCTTAGCCTTGACTGCTCTATATTTCCCCTGTGAAACAAGTTTGTGTAGACTGCAATTA  
AATTCTTAACTGTGATTGGTTTACATTGTCACTATTTTCAGGAATGAGACATGTTTGAGCTGAG  
ATGACTCAATGGGAAGGACAGAAAATATGTGATCAAAACCTGTTGGAACATTTTATAAAA  
CAGGTATTTTTGATGCAGCCATAAGATGAACAACAAAACCAAATACAAAACAGAATAGATC  
CCCTTATGATCTGGATTAATCACAAGACACTCATTCTGTCTTATACATCCCCTTAAGAACATC  
AAGAGATATGTCAGAGAAATCTGCTTCATTATCCTCCAATACGGGCCAAACACGAACATTGT  
CCTTCAGTTCTCCATACAAGTTAACATCTTCTTGAAAGCATTATTGTTTTCCCGTTCTATCTT  
TGCAGCTAACTCTTCTCTCCTGAGCTTGTCAGTGATTCAATCACTGCTCTAGTCAGTTTGTCT  
AACAGCTTTTTCATTTTTGGTCGATCTTTTGACAGAGGATGCATTCTTAGTTGTGCCTTAATA  
TTACCTGCTAGTGATCTAAGGTAATCAGTGATTTCATTGCTTGCTTCAGTCGTTGATTACTA  
CTACACATTATGTCGTCCTCCCGATCGGTTTCTTTTCACTCTCTCTGGTACAAGAGGCTGCA  
TACCAAGCATATCTTACTGCTTTATTACCAGCAATACTGAATTTGCACCTAGCAAACAGAGG  
TGTGGGTAGTATTGCTATGTCAACTTTGAGGAAAAGATGTGCTGGAAATTTCTAGTGCTAG  
CAACAGAAAGGTCTTTTCCATCTCAACAAGAGAATTAAGTTTTCCAGAATATAAATGGGAG  
TTTAATAATTTGGGCACAGGTCTATCGTCCGAATCTGAATTAGGCGGCAACACTCCTTGAT  
GAAGACAAGGGCTAATGCAGCTTGTAAGGCCTTTTACCTCTTGTTATGTTTTGAGCTACGAC  
AAGTGGAGTTACTTCACTGATAGCTATGAGGTTAAAGATCCTCTGAGAGCTTCCATCTCCAT



GCAATATACAGAAAAGCAATGCGTCGAGCGCTTTCGTTCCAGCTGAGATTAACAGGTTTCATA  
TCTCGTGTAGCTTGGTTTTCCACAGTATTTGATGGTCACTTCATTAGCTACATATGCTTCCTCTT  
CCTGTTTTATTGAAAAAGGAACTTTTCAAGATGATGTAGTATCTTCTCTGTATCAAGAGAGT  
ACGACGTCTCTTTCAGCATTTCCTCAAATTGTTTCGAACTCCGTATTACTCGTTCTTCCCTTTC  
CTCACTTGCTTGTCTGAACCACTGATTCTTCTTTTACCTTANNCTTCCACTCATCATCACAC  
TTCCGAATTAAACTTAAACGAATCGAATCGAGCACGTTCGTCGCTAATGGAGATCGATTTTCG  
GAATCGAACCTANNACCAGAGAGAGTTTTCGGTATGGATTCAGATCCTGTGATTCTCTCTC  
TCTCTAGAATCTGGAAAATGGAGTTAGGATATGGGNGGAATTTCAAACAGTGATAAAAACT  
ACGACTAAAAACGTGCATTNGATTGTTTGAATAAATTTGACATGAAAAGGCACAAACATTT  
GATTTCCAAAACAAGTCTGGATCTGAAAATCATGTATCATCAACTACTAGAATCGGAGTTCC  
ACGCCTTCCATTATATGCAACCGCAGAACTACACCAAGTTATAACACCTTGTTAGGAAGCTA  
CTGGAAAATATTACTAACAAGAA

>Seq66 [organism=Osteospermum ophiovirus] RNA1 genomic sequence

TTCCGATCTGATTTCTTATCCCATGATCTACGATCATGTTCAAGGCGCAATGCCATGTTTATTA  
TTATTCTCCCTTCTAAACATTCCCAATTTCAACTTTTGTCGATTATGTTATTTGCTTCTATTTG  
GCTGTTCAAGATCAAATGTTATGCGATCAGCAGTAGTGTAGTTTTGTATCACTAGTCCGTTCCCT  
AGTTGTTGTCATTTTCTTTCCTCTATTGTGATCTTGTTTGTTACATTTGATTTTCTAGATCTTTC  
CTTCCCATTATGATTATTTTCGTGTGGTTCAACTACTTTATGATCATTAGCTAATTGTCCTACGG  
TTATTAGTTGATTATGTTACTTAATTATTTTATTTGTATTTTACGTGATTTGATTTATTCTAACT  
TCACAGATTGTTTAATGATAATTTGTTTCCTTGTTTTTTTCTTTCTTTTGCCTTCTTTTTGTGT  
CAGGCCATTTATCTTTTGATCTTTTATTCAAAATCTTCCCAGCAATCTTCCCCTAATTCTTTTC  
TCATTTTCATCGGTTGTCATGTTCTCATTCCCTTCTATTTCTGATTCGTTGCACCAAGTAATAA  
TGCAATTTTCATTGTCAATTTCCCAATTATTTCTGCTTTCTCCATTTCTTCAATTCCTAACACT  
TCAGAGTCATCATGTGACTCTTGATTTTCTGGTTCCTGATGTATTCTCCTTTCGGTTAATTCTT  
CTGTTATTGCGTTGAATAGCTCATTTCCAAACCTATCCGATAAGTATTCTTCCAATGTGTCAA  
ATTCCTGAGTGCTTTGATCTCATTTTCAATCCTTCTTTCTATTTTCGTCTGATTCTATTCTTTTT  
TCTTTGTTTCTTGACAACCTCAGCGTCTCAATGGACCTGTTTTTACTTTTTTTGTTTAATTTGA  
GTGAGCCTAATTCGGATAATAGTTCCTTCACGTCTAGTGGCTTTGCAATCAATTCAAGAAAT  
AATCTTTTCATGCAATCCAATCATCCTGTTGAGCAATAATTTGAAATTTAGACAATCATACCTG  
TGTGATCTTGTCTTGTTTTCCATTAAGCTTTTCATTGACCCTTCCGTATTCCCGCAAACCTGCA  
AGAACACTCCTTCAACATTCCTTGACAGGTATGATCTTTTCACTATCTTGGCTATTTTTATCAT  
CCTGTCAAATGAATGATATTTGTCCCTGAATGAAACTCCGGTTTCTATGCTTGAAAAGAGTC  
CCTCTAAATCTGAATTCTCTCCTTCTTGCTTTTTAAGTCCTAAAAGAATCGTTTTCAATGATTG  
ATAACTATCACGTCTGATTATTCTTTGATCTAATAAATGCTCTATTATGTATATTAAGTCTGTT  
ACTCTTCCGTCTTTTAGTCCAACCATGTACAACCCTGAAGTGTATTGGAAGCTCGAGTTCACT  
TCAATCTCAGGTGATTTGTTATTGTTTTTGTAACCTCTTCTTTAATTTTCTGAAGATAGATT  
TATTAGGTATATTTTTCTCATCTTTTATAATAAACACGGGCCAGGATAATTCCATTAATTCCA  
AATGTTTTTCTTTAATTCCTCTGCTCCGTTGCACCATACCATTACACTTCTCTTCTTGCT  
ATGTAAACCTCTTCCACTTCAGTGATGATTAGTTCTTTGATTTTGTTTCCTTTCATTAATTTCT  
TCTCCATTTCCGCTTCTAAGAATTTGTCATCGTTGTTATCCTCCAACAATATGTTAAGTAATG

TTTCATCTGATATTATTTCCATAGTGTGATCCATCACATCCGTTGAGCTCTTGTTGAACAGAG  
AATCCTTTCTCATCTTGTATATTTCAATTTGTTAACTTTTCAGCTATGATTGATTCAGTAAACGA  
AGTTTTCTCTTCTCTTATTTTTTCAATTTTATTTTTTCTAGGTTTTTTCCTACCATCTGATTTTTCT  
TATCATAACATACATGTACCCTGGTGATTCCACTGAGGGCAGGAGCAATTTTCCTGTTCCGCT  
ATTGCACAGGTTCTGAAGGAAGGATAAATCCTGATTTATAATCGAATTGATTCTAATTACTA  
TCATCTTATCATTTGTCAAACAATTCTTCTATCATGTTTCTCAATGTTGTTTGGCTCCCTGTGAA  
ATGAGACAGATCCATCAAAAAGACATCATGATCTAAGTATTGACCATAATTTTCATTTAGTG  
TCATATCCACTCCTCCTTTGATCTCTATCATTCCTGGCACTCTGTTTATGAGGTTATAGCCATC  
GTTTCTTGATATTGATGTGTGACACAACTCAATTGAGTCATGGCAAAGTGGAAGTCTCCTC  
TTCTCCGAACACATCCATTATTTTTAGCTTACTTATTTTTCTCTTTCAAGAAAGTCAAAAGTC  
CCATTGCTGACGGATACACATCTGACATCGTTGGTGATGATACGTGTTGTGGTTTACAGTGG  
AGAGTGCATATCATTTTATAACTTTTTATTGCTGCGCTTGTCATCTTGCTGTCTTTGAACATTT  
TGTCGTCTATATCTATTTCTTCGTAGCGCACTGCACCGAAATCTTTGTTGTCAAATTCATTCGT  
TATGTAATGTTTAATGTCCTTATCATAATATTGAACTAACATTTCTGTTTCAAAAACCTCTATT  
ATTGAATCTTTTATATATTTTCGTCTATGCAATCAAATAGTTCACCTATTCTGTATCCACTTGTA  
GGAAAAGCCATCATGATCAAGTCTGATACTCTCTTATCCCTAATATGGAAATGTGCTTGATT  
CTTTTTTAACCTAGTTAAATTATTTACTCCATTCTGTTTTGTGTTATCTCTTTTGATTATCATTT  
TCATGCACCTTGGAATTTATTTCTTAGTCTAAACACCAAGCATGTAGATATTATGAATATCT  
TCATCAGCGTTTTTCTGTAATTCAGTGAACCATACTCTTCAATTTCCCTTTATCCAATGATC  
ATTGTCTTCCTTATTGCCTATTAGTTCGGAATTGATTATACTTCTCATTACTGTTTTTGTGTAA  
CTTTCATTCCCTATGATGTTTAATCCCTTGTAAGATTTGTAGAACTTATTTAAGTAATTGTCTC  
TATTTATGCTCATCTTAACTTCAGGGGCAATTTTCAACAACACGTCGTCTGGTATCATTTCCGG  
GTGATATAATCTCTTGATCTTCCATGTATTTGTGGAGACTTCTGAATGATGAGATCTCATCTA  
TTTTCTCATTTGGCATGACAGACTTGTGGTCAACAAATTTTCCCTTGATTTCTTGATCACATG  
ATATAAAGTATGAGTAATTTTTGTACAACCTACCTTTTTGTTTTATCCTCTCCGTAATTAATTC  
AGTTGGTATTTTTCCCTTTAATTGAATTGGGTTGATCTCATCCTTTATCTTTATTTCTTCTAAG  
TTGAATGTCACATCTTTTGCATGTCTGACTATGTCGTCGTATAACATCAATGGTCCCATCTCA  
TTATCTGTTGCATCAAAGTATCCCATCATCACTTTTATGTACACCACTACTAATGACAAATTG  
ATGTTATTGTGCACTCCCCCTGTATATTCTAATAGATTGTTCAATCCAGTTATTTTATACCTGT  
TTGTTTTGATGTTTGATGTTAAGTCTCCTGTTTTAGGATTGAACCCACCTGACAGTGCTCTGT  
GAAAATATCTGCCTCCTTTCGGGCATACCACACTCTCAATCACATCACTAATTTTACAATCAG  
AGTATGTGTTTATAGTAACTTCTGTTATTTTCATTAAAGATTCCTTGACATGATCAGACACCT  
TTCCAAATTTTTCCATGTCCATTATCATCCATTTGACATACCGTACTAATCATATATCAAGA  
AGATGAGCTTATTCGAAAACATTCCTTCTATTTCTATGTCTCTGTCAAATTTTGTGAGGTTCA  
TGTGTGTTTTTGTGCGCCCTGCAAGTCTGAATTTGTCTCGATTTTTCCCTGTTCTGACTACACC  
TGCTTTCCGTATCGGGTTGATTAACCTAACCTATCATTAATTTCTAAAGTTCCTATAATAGG  
TAATTCCTCAATTTTTAAAACTCCATTTCAATCGCTTCCCATTCTCCATTATCATTCATATT  
TTCTTTTCTGCTGTGTCTCTTTGATCTACTATCCAGTTAAAGCCGAAGTTGCAACCTCTTATAT  
CATTTGATTTGTAATTAATCATGTGATTGCAATCCATGCTTTGTTCCATAGCTTGTTCAATTT  
TCTTTTCCCTAAAAAGAAGGATAATGTTGTAGAATTGTCGATTTTTGAATAGATGTCTTCAAC

ATAAGCAAATATTGAGCATTCAAGAAATTTGCTAACGATTCTATGAGAGAAACAAAATTGG  
AATGTTGACAAAAGTTCATGTTTAAATGTTCTTTCATCTTCTTTTGTCCCTAGCTCTAACAAC  
CTTTTAGTTGTTTGTGTTGTCACCTTCTTTGACAGGATTTTCTTCAATTCATCTTTCAATAATGA  
TTTTGTATCATGTCTTCCTCCTTCTAGCGGAAAAGGTTCTGTAATGTAACACGTTGCTTTGGA  
AGAAAAGTTTATTAGACTAAAATGTCTTCTTGTGGAATTTGTGAGACAAAAGGCTGTTGACAT  
ATTCTATCCGTTTGACATTAGAATGTGAGAATCCTGAGATCATAGCATCTGGTAAGCTTGTC  
ATTGCATAACCATACATAGTGTATGGCAAATACATCATCATGATTGTTGCTTCAATTAATTCA  
TCATTTTCCATGTTGAAATGGTAAAATGAAGTCAACATATCTGATTCTAGAGAGTTCCTGTTT  
GAATCTAGTTGATCTCTTAATTCTTCTGCTTTTCCTTGTTGTTCTTTGTTTTGTTTTATTTTCC  
AAGGCATAGCTCAGCATATTTTCTCATTGCTGAAATATTGCTAATGAATGATGTATTTAAATC  
TACATCTAAGAATTGACTCCATCTTAAAACTTCTTTTTCAATCACCGTCATTGCTCTGTAGTT  
CCTTATCACAATCTGTTTTCTAAGATTGTCGGTCCCTAACGTCGATGATGTGAATCCGCTGTC  
TATCGTCATCATTCTTTCCAAATCATCACCCATAAAACTTCACTGTTGGGGCTTATAGCTAG  
TACTCTTTTGTAAAGACATGTCTATAGGTCTATCTTTGAAGTAATGATTTTTCAACATTGAGCA  
TCTGCCGTTTGTTACTTGGGTTTGAGACAGTTTCACTAAGAGTCCCATTTTCAGAGCGTACGC  
TTGAACGAATTTTATAATATTGTTCAAACCTTTTTTCATCTAATTCTTTTTTAACAAAACTCCA  
CATGAATCGTCACTGTAAGTGGTCCCTATGAATTTTGAGAAGTTTAGTGATCTCATCATGTCT  
TCCATCATTAGTTGCGACTGAATTCCTCATAAAGGGCCAAACCAACCTTCTATTGCTCCTTTC  
TGATATCTTGATATCATTACATTATCTGAGAACAACCTTTCATACAGAATCACTATATCTGAG  
AATAAATAAACTATCATTGTATGCGTTCCCTTTCTTTTGAACCTTCTTCAAAACCATACATA  
TCAGATATTTCTTCCATTATAAACAATTAATTTTCTGGTCTTTGTGATGTGTTGTGCCAGAA  
TAATCAAGAAACAATGAATAAGAGTCATCTTCATCTAGTAATTCGACATTTGATGCATCAA  
TTGTCTTCTTTTCATCCTCTGTCAATTGTCAATTTGACCTGGTATCAATTCATTGCTCTTTTTC  
TCATTTCCATCAGCACGGAGATGTATATTTTCAATTTAAAACTTGCCACTCCGTAGAATCGAG  
CTTTTGTTTTTAATTCCTTTTCCTTTTCGACGAGTCTAACCATTTTGTATTTTTCGATTGATCCA  
ATGTTTTCTTCATCTTTTCTATCAAATACCCACATTCTCTTTCGAATTCCTTTTTAAACTTGTT  
GATAGATAGGCTGTCTATTAAGTCGGGGATATCATTTTTCGTGATATAATATATCAATTCTTT  
GACAGAATTTCTGAAAAGTCATATTCATCTTTAGTGATGCTTTATCTATTACTCTCGATGC  
CACGTTTACTTCTTGGCCTGGTTGTAACATTTGTCTAGCCTTATATTTTTGTAATTAACCTGG  
TTTGATACAATATCAGAGTTATAACTTCCTCCAGAAGCCATAAGATTTAATTCTTGCTCTAAT  
GTTCTTGACGCTCCTCTTAATGGGGGGACTATTCATATTTTTTTCACATAATTCGTCACCACT  
TTCATTCTGAAAAGCCATCTCAAATTTTCTACAGCTTCTTCTGAAACACTGTGTTTCCGGTTG  
GTCCTTTGTACATATTTTTCCAATCCTCCGTTTGTGTCAACTTCAGCGAAAGTGTTGATTTTTTC  
CCAGTCTGACATTTTAATGCATGTCTCTCCATCTGATTCTCTGCATATGTTTACCAATTTTTTC  
TGTCATCTCTCTGTCTATCTTTAATGATTCAATTATTGCATCCATCACCGGCAATGATGAAGA  
TTGGACTTTGGTGTCTGCCATCATCAAGCATAAAGTTTCATATGACGCAGCTAATTCTGTTCT  
TTTAGGATTATCTACCAGTGATAGTGATTTAACATAATCTATGAATTTGTTTTCTTCAGTTTTT  
GCTTCGCATTTCTGTCAAAATTCATATCTCTAACAATGTTTATTGTGCATTCAATTCTCAATTA  
CAGTAAAGAGATATTTGATCAGTGTGTTGTCACCAATGTAGTAAAAGGGGCCATAATTAAGA  
CAATGGAAAGTGTTGGCTTATGAAAAGTTTAAACTTAAAAATATCATTCAAGTCATCGTTATT

TTTCCTTATTTTTATGCTGGTGACACTTGAGCCATCAGAATTGATCATGCATTTGATTTTTCTG  
CCCTCATGCCATAGATCCTTCGATTTGTATACCCTTTTATTGCTGAGACTAGAATAACTCAGT  
TTAATTTTATGATTCACGACTTCAAATAAGTTTAACATCCACATTGATTGTAAAGTCTCCGTG  
CTTAATTCTGTTCCCTTTGATCGGTTTCTTCTTTTTGTTACACTTCAACAGATTGATTCTATTTTT  
ATGTTCTTCAAATTCTAGCACTTTTTCTCCAAACCTGAACAATGTCTCCATTCTTATTGAAGG  
TATTGAATAATCCTTAAGAATTTCGATAAAATTCAAGCATTTTATCCTGATTGCCTTGTCTAT  
GATTTTCTTTTCACCAAGGAATGACCGCAATCTCTTGAGATCAATCCTCGATCGCATTCCAAA  
TTTCTCCGGATACATTCTGTAGTCTCAACCAATTTTCTGATATTGTTTTCATTAATTGGCTTG  
AACGGTGAATCTATTCTTGAGATCAGCGCAGGCCGATCAATATATAAGTCAGCCAGATATTC  
CTTTGGCCATTGCTCATAATGATTGATCAAACCCATGTACCCTAGTTTGATCTTTTTTGGTTCT  
AGAGATTCTTCTTCTCTCGAGACATTTCTAATGAGACGTAATTATCTCTTCCTGATTTAATC  
ACTTCTAATACGTTTACACAATTTTCTGTCTCCAGTGTTTTTATCAGGTCCTCAAACCTCTTTTT  
GCTTTTCTATTGTTGTTGTTAAGTTTCTTCTTCTGAAGAGTCACCTTCAGTTTGATCAATACT  
ATATGTCACAACATTGCTCGACAGCGTGATTCCATCTTCGAATTTTTCTTCAACTTCAATGCT  
TTTCTCTTGAGTCCACTCCATATTTCTTCTCTGCCTCTATTTCTTCCTAATTTCAACAAGAAGG  
TTGTTCTGGTCGTTGACGTTTCAATTGAGTTTTATTAACGAATAGAATTGACGGATCATAG  
TAGTTGGTAGTTTAAACCCTTGTTATTGTGATTTAAGCTATTCTGTAAATCTCCTCTTATAAT  
CGCAAAGAGTCCTGTACTTAAGCTTAACCGGTTTTCTTTCAACCAGATTATCTCTTATCCACC  
TCTTGATGGCATCATATTTCTTCTTCAACATATGTCGCATTTTGTCTTTGCATCGTTTTTCCGA  
TTGTTCCACTTCTTTCTTTAAATTTGTCAAGGTTTTCTCATGACAACTCATCTTTTCTGTGCG  
ATTAAGTTGAACTCTTTTCTTATCATAAACTTCAATTGATCATTAGATGAATTTTTAAGGGTA  
TCAGCTAGCTTTCCTGAAATGGTTATATCTTGCTGATTGTATTGATCATTATTTGATCAACC  
ACTGTCAAATAGTCATAATCCTCCCATAAGACATTTGTAGTGTTTATCATCATTTTGTGAGCT  
CTGATTTGCATTCCTTCAAATTCATGTCTGGTTTTGATTGGGTTCTGTATTTTCCATTCTCT  
CAAAAGCATTCTTTCCAATAATCTCATCATTGCACGTTAACGCCCATATTCCTATAGCCTCCT  
TGCAAACATTATATCATCTTTTAGGGTGTCTTGTCTTCTATGTCTATTTTCTTGTTATTATA  
GAACACATCTCTCCATTTTCAATTTAAATTCATTGTCTTGAATCTTTTAAATTTGAATTATTC  
TATCCATGCAATTCGGGAC

>Seq67 [organism=Osteospermum ophiovirus] RNA2 genomic sequence

ATTGATCACCAATATTTTATTAAACGAGTAAACGCACACCAGTAATCTCGTTACAGTTTAA  
ATCCACATTAGTTTAAATATGTTTCAATGATTTGGATTTTAAATCATTTTGCTGACGCGATCA  
CTTCCATCAAGTACACATTTGCACTTTCCTGACCACCGTTTGTTACTTCATTCCATTGTGATC  
TTTCAACCACATCCTCCCAGGGTCACAAGTGTCAAATATCATGACTATTTATCATCTTTTTT  
CAAGAAAAGAGAATCTCCTGCTGTTTCCATTGCATCAACCAGCTTGTCTTCTACCAGCTTGG  
AATATGATAAAAGATTGCTTCCCATCCTTAGATCATTGAATCCGTAAGCAAACTTATATTG  
AACCAATTTCCAAAAGCTTTAAGTTCAACAGACATCTCTTCCACTGAAGCCTTATCTACACC  
ACCAAAATGATCCACTGTTGTATTTGGCCTGAGTGTAGGGACATACAAATAATGATCTGCTG  
ATCCAGTATCAAGCATTGTCAGCAGACCATTTCTCCTTCAATCCTCACTGTTCTTCTAGGTT  
GCTTCAATGGATTAGGTGCAGATCTTTGATCCTCAAGATACTTGGACAAAACAGATACACTT  
TTCCGTCCTTCTTCAATCAAATCACTTGGATCAACTGATGACCCAGATGAAGTAGATGATCTC

TCCATCTTGAAATTCCTTTTACTTTTCCTCATTCTTTTGACCTTTCCAATTCTCTTCGTTTGAA  
TTCCAATCTTTTTTTCATCTATATTTTTTGTACATTATCTCCAATCTTCTTGAAGACTGATGAT  
CTAGTTATGTCCTTTGGCCTATTCACTGAGTCGATGTATAAAACAGTAGATGGTCTTGTTTTCT  
GATTTTATCGGGATAGATTCCCTCAAATGTGAAAAAAGCAACATTGAGAGCCCCATATGATCT  
TCCTTCAATTGGCACTCCTTTTCGCAGTTATGTTAATGCTGATTTTGTCCATCTCCTCTTTTCTT  
ACAAAAAATCCCTGGACAATTCAACAATTGCCATTTTCAGATGCATCAAAGATCAACCTCTT  
AATTATTGGGTCCTTTCTGCGTCCTCTTTTCCAGAATCTTGAAGTGATATGCTTATTTCCCCA  
TTTTCTCCCTCTTCTGTGAAAACAAAGGAATGTACATGAATTGTATTTTCTCGAACTTTATG  
AACGGTTTTCTTCCTTACCACCTAGTTTTTTCATGGCCATCACTATTTTGTCCATGGTTGCCA  
TCTTAAGCTTCTTGTTATGCTCAGCCTCTTTGAGTTTGAGAGTCAAGGGCACTACAGCAGTCT  
CAACAAGTCCCTTGTTATATTGGCGAAGTCCATTGTGATTCTTCAATTCCTTCAGGGAGGT  
CCGAGTTTCCATCTTTTAAGCTTATCACATTTAAGGATCCCTTTTTTATGAAGTTATTACCCAC  
TGAAGTAGCTGAGATTCTGGCTGGCTTGGATGTCATACCGTCAAATCTGTTGACTGCGAGCA  
CACCTGCGGCTGATTTGTAGCTAGAGCTTGATTTTACAGACATTTTCGCTGATATCGATTGAT  
CTTTTGAAGTCTAGGTACTAAAAAAGTATCGGTACATACGTAGTGTGTACTTTGGTTAACT  
GGACAATCTGTCTGATTCCAGAAGGCGCAATGCCATGGGTGGAATTCTCGTCAGCGGATCAT  
ACT

>Seq68 [organism=Osteospermum ophiovirus] RNA3 genomic sequence

GATGGAAGTGTCAAGTGTCTGAACCAATCGGACCACGTTTATTTTCATCATTGTGGAAAGTG  
CTTTTAGGATCCTGGACATCTCACGCAATTTTATATATGTTCTTAATTCCTTCAACACTTATAC  
CGCTGAAATCTGCTTCTGCGTTTTTGAAGTATTGGCCACTCTCTGTCTTTTCCTTCACCGTATCC  
GAAGAAGTTGACATCTCTTTTGAACGCTTCATTTTGTGAGCAATTATTTTTCTGCCATTGCT  
TTTCTTCCACTTTTGCTCAGAGAGAACTATCGCACAGGTCAGCTTTAAAGTGAAGTTCTTG  
ATAGTCGGTTTAGAATCTGACAAAGGATGCATTACCAGCTGATTTTGTAAACAACCATCCAA  
GGAAGCCAATGCATTTTAAATCCCTTTCGCGAGGGATATTTTCCTATTATTTCCATTATTAA  
TGGAATAGCTGACCTTGCGCTTTCATCATCAATTTCTACTTCGTTTACTTCTTCAAACCCT  
TGCAAACACAGCATACCGTATTGCCCTATTTCTGCTACATTCAGCTTGCATCTTGAGGCTAC  
GGGTGTTGGCAGCAGATCAATGTTTCATCTGCAATAACACTTTTGCAGGAACTTTGCAGTGC  
TTGTGCAACTGAGCTCTTTCCCAATTTGTTCCATGCTTGAGATTCTCCTTCATACAATTTATC  
GATTATGAAGTTTGGCACTTTCTTCCTTCTGCAGTCTTACTTCCTGGAAGACTTCCTTGTAC  
ATACACCAAACGATTCTGACTGTAATGCTCTTTTGTCTCCCTAACATTGATCACAATTTCT  
CTTTTCAGATATACCTTCTTTTATTCTTCTTCAATGAATAATCCTTGATTGACTGGATCATCT  
CTCATGCTGCAAAACACCAGAGCGTCCAATATCTTTGTTCCAGCTGCAACCAACATTGTGAC  
ATCATCATTTCTATTATTGAAGTATTTCACTAGCAGATCCCCCTGTCTGTAAGACTCATCTTC  
TAGTGTGATCGTTTTAACAAAAGCTTCCAATATTTCTTTTAACTTAGATATTTTCGAGGACATA  
ACTTTGGGACTTGATGGTTGATTCAATCTCATTTTCTTGGTTATCTTCTTATCAGACAATCTG  
CTTGTTAATCCTTTTCTTGGTTCTTTTCTTCACTCTCTTCTTTTTTCCATCTCCACTGCT  
GCTCCCTGACATCTTCATTATCTTTCCCTCTACTAGAGTGACCATCTGTTCTTTGTTCTTTTC  
ACCCAATTAGATACCAATGTGCAGTTAGAGGACATATAACTTCCATTCTGCTTTAATAGCCC  
ATATTTCAACAAAAGTTCTTTGATCTCATCTCTAGCATTCTCCTTATCGCTGACATGCTCCTC

AAAGGCTGCATGGAGTTCGGAACTTTGATTTTGGATTCCATGGTGTCTTAATGCTTGAAAA  
ACTTGCAAAATGGTGCTTG

>Seq69 [organism=Phalaenopsis ophiovirus] RNA2 genomic sequence

ACCATTTTCACAAATAAGAAAGACACACATAACACATCATCACATCACCATTTTAATATATA  
ATTATAAATTGATTATCATCCAAGGACTACTTGGGAAGTATCGTCATTATTATCAAAAACAA  
GATAACCTCCCTTCTTAGAAAGTGTATAAATAACCCTCTCATCCTTTAATAATATAGATTTTT  
CATTATCTAATGATCTAAGACAGTCAACAATTTTATCTTTGACCAACTGATTAAGATATC  
AAGGGTTGGTGTCTGGCTGAACAATAGAGAACATCATTCAATTTTGTCCAGTGCCTACCTAA  
TTTGACTTCAACTGGCCATGGCAATATAACTTGCCGTACACTCTTAAACATTGAACTTTCCT  
TTCTGAAACGTGGGATCCTCCTATGAAATTTGGGTTATAAAGATGATGTTGAGGAGCACCAC  
TGTCCAAATATGATTATCCTTAAGCATGTATGGTAAGTCACGAGGAAGATGATTATGAATT  
TCTTTTTCAGTAATAGTTTTAGGAGGAGTAAAATTTTCTATTGTTGATTCACTATCCTCAGAC  
TTCTTCCTAAAGTGTTTTCGTACTTTAGCTTCATTATATTTAATTTCAACATCATCATTAGGTG  
AAGCATCTCTTCTCCTCAAGCTTCTCTATATCTTCTTCAAGTAACTGTTCAATATCATTTTT  
ATTTGGTGCATCAATATAGATGTCATTGTTCTGAGCTCTTTCATCCTAAAGTAGTCATGCTT  
TCTCTGTTTGAACCTCTCTTCTGTTCCGTATATCTGTGTTAACTTTGTCAACCAGCTTTTTG  
ATACTGCTTGTCTTGTTAATATCAATAGGCGCGTCTATTTCAATTAGTAAAAGTGTCAAGGGT  
GCTCTTATCTTCATACTAGCAGGAGCAAAATCCCTATGAATATAGAAAGCAACCATAACAAA  
AGCATATGATCTACCTCTGACAGGTATTTCTTCAGCAGTGTAATTGAGAGTAATGTTCTCTAT  
CTCTTTCATCTTAGTAAAAAACTCATAGACATCTCACTCATTGACATGACGTTCAAGGGAA  
GATCAACTCTTGATATCACTTGTTTGTATTTTCGATAACTGAATTGTCTTTAATGAGAATCT  
AATGATTTTTCCCTCAGCTATTCTTCGATCAAACAACGGCATGTAAAGGATTTTTACTTTATC  
TATGCGACAAAATGGATATTCTTTCTCCTCAATGTTTTTGAGAGAAGATGTTATCTTTGGAG  
AGTTGTTAATTCAACTTTTTGAGAACCCTGACCATCCTTTAATTTTAAAGAGAAAGGAGAAA  
CTATTGACTCTATTTCTCCGCGGGTTACATTTGCGAATTCTGCTGCCATGTCCTCCACATCAC  
CATTGATATCACCTCTCCTCCCAAGGAAACAATAGTATGTGCACCATCATTCAATAAATGG  
TCATTTGCTCTTCTAAAAGAAGCCATCTTGTAAGAAGTCAACGATCTATTATTACTGGACGAT  
TCATCATTGTAATATTCTAATGTGTTGCAGTGTCTCTCCATTGTTATTTACGTGGTTCTTTTG  
TGCTCTGATCCGAAGTGCACCAAGCAACAAAAGCACAGCGTCTCCGAATCACTCTAATCCAA  
ATGACCAAGTGAGACAGATTACTGTATCACAGACTGGTTGTTGACACTTAAGCAATTCAACG  
GCAAGCAGATGCAC

>Seq70 [organism=Phalaenopsis ophiovirus] RNA3 genomic sequence

GCGTGTTACAACCTTATCACCAAGTTAAAAATTTTCAATTTATTAACCTGTCATCACATCAGCAA  
ATCACTTGCCATATGCAGCCTTGATATTAGTGATGGACAGGCTAAGGAAATCTGCATCGGTA  
TTATCCAGGATGGGAAATATTAGCTCATTTTCATTGTTTCATGACTCCAAAGAAATTTGTATCT  
CTTTTGAAGGCTTCAATCTTCTTATCTATTATGGTGTTCATGAAGGTCCTGTCTACCCTTAGCA  
GTGAGAGAATAAATGATTGCATGTGTAAGTTGCAGTGTAAAATTTTCAATACTACTTTTTG  
AGAGTTCAAAGGATGCATCCGTTTTTGTGCTTCCCAGTCAGATGACAATGAACTCAAACAGT  
CAACTATATCGCATGCGGAAGATATTTTTCTATTAATTGCTCTGCCCACAGACCTCCGATAT  
CTTCAGCATCCGGGTCTCTTCTTTCGAAAGACTTTGCAAGTACTGCATATCTAATTGCTCTAT

TCCCCGCAATAGACATTTTGCACCTGGAAGCGACTTCAGTTGGTAAACTATCAATGGATATT  
TGTAAGAAAACGGAAGCAGGGAACCTCGAAGGGTTTGTAGAAGAAAGTCGTTTCGCAGAACA  
TCAGTTCAGTAAGATTGTTGTACCAAATATTGTCTCTTTAACAAATCGAGACATTTCCCTAT  
TCAACTGTCCTAATGAGGGCAAATAGCCTTGATTATAAACAGTCGTGAAAGCAGCTTTAATT  
GCTTTCTGCCCATAGTTTATATTTTCAGCTATCTCCAATTTATTACCTCATGATCCATCTTTT  
CTACATCGAAGATGAAGTTATGTTTCATCTGATTCATGATAGCAGCAGTAAAGTATGCTATCA  
AGAACCTTGCTCCCTGCAGCAAGAAGACTTGATACACTTATATCAATGTCTTTGAACATGTA  
AATTTTCACTTCTCCTGGTAAATAGGTTTCACCTGATTTTCGGCAATGTCTTGATATATTCTC  
AAGTACCTTTTTGATATTTTCCAAATTTAGGTTCAACGATTTTCTTCTATTAGTCCTTGTAAT  
TCAGATTTTTCAACAAGTGTTTTGTTGTATACTGTCCGTGCTGTGATAGTTGGAACCTGAGAT  
GAACTTCCCACCTGAGTAGTTGTACCTAACACGATTTTACCTTCCGCTGACAAGAATACAAT  
GTCATTTGGGTTTGTATGTTCAACTCTCTGAGTTTGATGACATTTTCTTGTTAGGCAAGTTA  
CTGCTTGTGTATAGACCAACGTCTTTCAGAATAGTCAACTCATTTCGCCGACTTCTTCTCTTG  
TTACACAGAGACAGCAAATGTGATGCAGAATATGCTCCTGACATTATGAACAGTAGTACTTC  
TTGACAAACCAGCAAGTGAACAAGCAAAAAAACTGAACTTAAACAGGCTACAGAGAACT  
AGACAAGAGATTGCAAAGTGAGCAAGTAGTTTGCAGAGAGATA

>Seq71 [organism=Phalaenopsis ophiovirus] RNA4 genomic sequence

ACTCGCCAGGTTACTTGTCTAAGTTAACTACTCCTACTCCTACTGACTAACGGGTTCGATT  
GACCGTAGTTTGGAGCATGGTTAGTGCTCAAGGGTGTTTTTTATCATTTATCCAAGTTTTAT  
TTAAAACCTATTTCTCTGTAAAATACAAATAACCATCTATTTTATCTAGCTCAAACATTATC  
TTTCTATCAAGTATAAGATAACACTTACTGTCAGAAACATATTTTCATACCATTGATAAAACC  
ATCTTCTACTAACTGAATATATGATATTATAGGTTCTGAATTGCAATCACCTATGCAAACATC  
TTTAAGAGGAACCCATTTATTATTCAATTTAACACTTATTCCTTTTCAATAATTATATATTTT  
CTCTTCTGTGATTCCTTGTATCCATCATTGGCATTCTTTTATTTGTTTCAAGGTTATTGTAAT  
ACAACCAGTGATTTCGGTGCTCCTGTGTCAAGGATATACCCTTTACCCTTTATGTGTGGGATAT  
CTCTGGGCAATAAGTTTTTATAGTTTTTTTCACTTAATTTGAAGGGAATTTTCATTTTTCCCAT  
GTTGATATCATTTTTTGAATTTTTTATCCCGAGTACAGAACTACCTTTTGATCTATTGTTCTTT  
TCATGTATTTTATTTTTCATTAAGTACCTTAGGACAATTTGTGCAATATGATTTTATTGATTTCCCTG  
ATGACCTGGAACCTGTTTCCCTCCATATTAGATTCTTTAGTTTTAGATGATAATTTGAACTAG  
AGCCGATGGATTTTGAAGTCCCATGATATCATAAATCTTCCTTGTTTTGTCAGATATGTTTG  
ATTTACCTTTAAAATCTCTGCTGAGTAATGTTATTGTTCCATCCTTTATTGAACTGTATTGAG  
AAGGAGAAGGATGATTGTTCAACCATGATTTTACATTATTGTCTGTGGAATTCATTTTGTTAC  
TTTCAAATGATATTTTTGTACCATGCAGGTATGAGTTATTATGAGAACTTCTACCTTTTGTGG  
GACATGATGAGCAATGACTTTTCTCATACTGTTTTTACTCAAACATGATGAACAATGTGAT  
ACAACCTTACCTGTGACACTTCGATCTGCCCATGTAACCTTTCTTGGGTACAGATAAACTTGAT  
GGATAGGGACAGCCTCCTGATGGGCAGTTTTGACCTTGGTAAGCATAACTACCATGAATTGG  
GCATGTCGGGTCAACCATCCAGTTGTTCCCATTAGGATCTACACCAGAGATCGGAA

>Seq72 [organism=Primula ophiovirus] RNA2 genomic sequence

TTGTTTTTGGTCTGAACTGACTACCGGTTTTGAAATAGGTTTTGTCCAACAGTGGCGGAGA  
GATGAACTAAATGGAGTGATTGTTGACATGTTTGTTTGAGCACAATTATTACCTTAGACAAC

GGATCTCTTAGGAACCTTATTCAACACTCAAAAGCAACACACAATTTGATCTCTCACTTCCTA  
GATCCCAGATCCAGAAAGCACAATTGCCCGTTTTCAACAACCTCCAACCTCCCACACCAGTTT  
ACTTTCCTTGTACAAATACCCTGAATCACCAGTTATTGTCAACCTGTCCACCAAATCATCCTC  
TTTGAGCCTGTCAAAAGATATGACATTTCTTCCTATATTGTCCTTCACCAGAAACACACTCGA  
CAACACAACCACTTTGCCCCCTATTATCATTTCAAAAGTTTGATTCAACCTTATAGCTGATCTT  
CTCAAACCCTATCACATTATGCATGTCAACATTGGGGATTACATGTGGAGAATAAATGTAAT  
GGTCCGGAGCTCCAGTGTCCAATATCATATTAGCAGCTCTGGAAGCCGTTCTAGGACCAATA  
ATCGAAAGCCCACTTGTGCTCTGATGAGACTGAGACACAGTGCTTAACCTCTCCCATTCACC  
AGAAGAATTCTCTTCTTCCTTGTCTGCTTCTTCTTCCCCGTCATCCTCTCCATCATCGATAGCC  
ATATTTCTCTTAATCCTCTCAATCCTTCTCTCCTCACTTCTCCTCTCTTCATTAACTTCGCTCT  
ATTCATCTTAATTCTCTTTTGTACACTCGCTCCGAGTTGAGTGAACACTGTCTTTCCACCGAT  
GTCCTTGGGGACTTCCATGTCATCAAGTATGAGAGACATGGGATCTTTTCTCTTGTACGTGCA  
AGGATCTTGATCGTGCTGAACAAAAAAGCTATCATCATTGATGCGTAAGATCTTTTATCAA  
CATCAATTCCTTCTGCCTTGAACCTCAACCTGATGTATTTTCATATCTTCTCTTTTACTTTAAA  
ATTCATAGACAATTCGCTTAGAGACATTACACCTCCAGGAATCTCAACGCCTGATATTCTCTC  
GTTTTCACCTGACCTTGATTCGTCAATTAGTTCAATAGTCATTTTGCTCTTGTCTTTTCCATTG  
TTGTGGAACAACGGACAATACATGATTTGAATCCTGTCAAATCTGACAAAAGGTTTTGCATC  
TCCCATTAGACCAATCTTTTGAATGGCTCCAGTTATTGATTCCAACGTCCCGATAGATAAGCC  
AGTTATTTCTTCCTCCTTTTTCAATCTGACCGTCAATGGAGTTATTACAGTCTTAATTTCTCCT  
TTGGATATTTGGGTGAAATCTGCTGCTATGCATTCAATGTTTGCCTCCATTCTCCTCCCTCA  
GATAAAGAGATAATGTTGTGTACACCCTCTTTCATTAAATCGGCACTAGCACGTCTCGAACT  
CAAGGTAGGAATTTTGGGCTCGTGCTAACTATACTCTTGTCTTTTTGGACTTCAATGACGA  
CATCCTCTTAAAACTCGACATGTTGATTTCAAAAGAACACAAGATCTATTTTTTCAG

>Seq73 [organism=Primula ophiovirus] RNA3 genomic sequence

AAAAAACATATCATGATTTCTTTAAACGAGATTACACCTGAAGACGAGTTCACATACTCTA  
TCTTCAACAATCGATCACTGTTTATTCTTCAACACGCAGACGCTTAAAAAAGGAGGAAAAGA  
AATCTCAAGACATCATTCGGTCTCTTTCAGACACTTCCTTGAGCAACAGCGGCCACACCATA  
GTAAGACCTGAGAGCTTCCACTGATACATCATTAAATCTGCTTCTGTGTTCTCAAGGATGG  
ACCACACGACTTCATCACCAACCTCTTCTCCGAAGAAATTTTTATCAATTTGGAAAGCATTGT  
TTTTTGCATCGATTACTCTCCTTCTCATCGCCATTCTGCCATTGCTGGTCAACGACTCTATGAC  
AGCTCTAGTAAGCTTTAAAGTCAGATTTTTTGACAACAGGTCTCTTTGGGGCCATAGGATGCA  
TTTTCGCCTGAGCAACATGATTCCCGTTTAGAGAGACAAGAAAGTTGCAGATTGCATGGCAC  
TTATCTATCCTCTGATTTCTTGCCACAGCAGCGTCTATGTCTTCAACTCCTTGAGAGATATT  
TTGCTTCTTTTTTCCATATTGCATGCATAAGCTGCATAACGTATGGCCCTGTTCCCTGCGATA  
GATAGTTTGCACCTAGAAGCAACGGCATGGGGAAGCAAATCCAGATTTAGCTCTAGGAAAA  
TAGATGCCGGGAACCTTGAGAGTAGAGGTTGAGGAAAGTTGAGCCGCTATTTTCATTCCTGTT  
ATGGCCAGGTTTTTGTATATACCTTCTTTGACCAGTCTCGGGACCTGTTTTTCTCATCTTGTC  
CGACAGTGGGCAGGCTTCCTTGAGTCCAAAACAAGACAACCTCCAGCTTTTATCGCTTCTTT  
GCATTGTCCACGTTTCGTGCCACAACCTTTGGCTGTCAGAGATGTCACTTGTTTTAAAGAAAA  
CATCTTCATCTCACCTTCATTCTCCCTGCAAGTCGCATATAACATAGCATCTAATATTCTAGT



TCCAGCTGAGATCAGAGGAACCAGTTCGTTAGAAGGTTCTTTGTCAAAGTGCCATATCACAA  
TCTCACCCCTTGGTGTAAACCTTCTTCTTCCCTTTGGAAGCAACGAGAGATAAGCTTCCAACCTGAG  
CTTTGAGTCTGATCAAATCTATATTGAAGGAATCATTACACTCTCTTTCTTAGCTTCTTCAC  
CTGTGGATATCACTTTGCTGCCCACGTACATTTCTTCTTCCATTTTTTCTTTGTTTTTATTTTGA  
TTACCGCTTGAAGACTCTACGGCCTTCCTGACTGATTGAGATCTGTGTCCATCTTTTGACCAC  
TCTGTGATTACGCCGTCTATTAGAGAGACAACAGAATCATCCTTCATCTCCTGCAGTTTGTGG  
TAGTTCTCCACAAGCAAACCTTCATCTTCATCGATGAGGCCAAATTGTTTAAGTAGTCTAATG  
TCTCCACAGTCATTGATGCACTTTTTCTCCTTGCCATTGCATCCATCAATGAGATCTTGCTG  
GTTTTAGACGCCATTTCTTTCAAGCTTGAAAAGTTGGTTCCTTGAATTGCGAAATAGTGAAT  
CTTTG

>Seq74 [organism=Pseudolycopodiella ophiovirus] RNA2 genomic sequence

TTGATGTCAACAATCGTAGTTTTGAAATAATACAATGTACTCCGTAAGTGGCGAGCTTGGAG  
ATCCCTGAGCCGCTCAGCTGATAAATAAAGTCCTGGACGAGACCAGGAGCCCAGGAAACAG  
GGCCATCCTTTGAAGTACTACATTACTACCAATATCTCCAAGGTATCAGTAAATGATATTCTA  
TGTAGACAATAGACATTTTAATTTTGATTATATATTACCTTCCTTTTATATAAAACGATAAC  
TTATCATAGTTAATCCTATATAAAGACCTTATAATAGCACGTTAAACAATCGAAACATAAGT  
ATTTATTTTTTCGTGATTATCGTATTCGTTATCATAGTAACTTATTCTGAATTGCAAGGTCTCTC  
TATAACCCCTCTTTCCTTTAGTGATAACTCCATGACGGCCTACTAACATATTAGCTTTATTCAT  
ATAAACTCTCGCCTCTTATCTCGGTTTTCTAAAACTAGATATAGATTATTATCAGTTTTTTC  
AGCGCATAATTTTAATTTGCCGGAAGATAAAGATCAAAAGTTGATGTTTTCTCATCTATAA  
TTTCTGTTTTTATAGAATCAAAGAAACCTGATTGTTGTAGTGAACCAAGCGACAATATGTTTT  
TCTTCACCTCGGATGTTTCAAACACATTGAGCAATTTGATGAAATCATTCTGTATATAAAACA  
TTAATTCTTTATGCAAATACCCTTTGATTTTTTTGCCATCAGGTAAAATCATCTCATTACATTT  
TGAAGATCTCTCAGACACAAGGATATGTTGTGAGGCCCTGAATCTAGGTACCATTGTCTTA  
TTTCTTCGCTTTCGCGAGCCACAGAAAAATCGGTATTCTCAATAGCCGATGATGAAATCATA  
TTCAACTCTTGTTGAGATTTGTTCTGAATCATGTATTCGGAACGTCTTTTTCTACCATCTTGC  
TTGCCTTCTTTGAACTTGTCTTTCTCTTTTCTCCAATTTCTTTTCAATAGACTTATTGAATTCT  
TGAATTATATTTTTACATTCAAGTTTTTAGGCATTTGTATGTCATCTAAGTAAATACATTTT  
GGGATATTCTTTTCATATATTTTATTGATAAACTCATTATGGACATGAAACAATAATATTTAA  
GTGCAAAAAGCCCTGCCCTTGACTGGAACATTAGAGAATCTATACTTTATTTTTATATGATCA  
CTATTCTTATCCAACACAGAAAAATTCATACTTAATTCAGATAAGGCCATTCTGTTGCCACAA  
AAGGTGACACCTTGGATTATCTGGTCTTTCTGATTAATTACAGAATCATCGATAAGAGTTATT  
TCACCTTTCGAATTTGCACCAATGTCGCTATTAAGCAGGTAAGTATAAGACATTGATTTTT  
TGATACCTGGTAAATTTATTCTTGTTACCAGGGACCATTTTCATGATGGTGTTCATGTATTA  
CTCAATGTTGTAACTTCAAAGGTTTTGATCCTGATTTTTCGGTAACCTTGATTGTCATGATAT  
GAACACCAGTGTAGATAGCATCTTCGACAAATTTATGAAAGTCTTCAGCCATATCTACCACC  
TCTGAAGACAATGCATCATTGCTATCCAAAGATAGAAACCTTTGAAGTCATTACCAAACCTC  
ATCTTGGACAGATTTGTGAAAAGTTACACTTGTCTTAGCTTCTACCAAGTGCTTATGTGATGT  
TGTGCTGAAGCGAGATGACGATGCATTTGAAGAAAATACATTTTCCATTTTGAATTTTGAT

TTTGTACTTTGTAGATTTATGATATTAGAAAGAAGTTAAGTTTATTTAACTTATCGATCAAT  
TATAT

>Seq75 [organism=Pseudolycopodiella ophiovirus] RNA3 genomic sequence

GTTATAATTAAGTTATCGATCAATTATATTGATGTAAACAATTGTAGAAGAAAATTTATTTAA  
ATCGAAACCGTAATACATGCGGTTTAGGAAGACTGTGAGTGTGAGCCCCACCTCACTTAGAC  
TACTTTAAAGATGGAATCCAACATCTCAAGGGATACATCCATAAAGTTAACATTCTGATCGG  
AAAGAATTTCCCAAGTCACCTCACCGGCCTGGTCAGTCGACCCATAGAAATTCAGATCTTTC  
TGGAATGCAAGTATCTTCTTCGAGTCAATATGCTTTCTCATCGCGACACGGCCACTTTCGCTC  
AATGTATGAAGTATCGCTTTTGTCAATTTTCAGCGCAAACCCGACAGGAAGTTTCTTATTCGGA  
TTCAAAGGATGCAACATCATTTGGGCCTCGAAGTTGCCCTGTCTATCTTTCAATCCTTTGACC  
AGTTTAAGAGCATGTTCCAAATTGCCTTTTTCAATTAGATCTTCCATTTTCGGGGGATCCGAT  
ATAGGAGCTACAGCCTTGTCAAATCTGCTAGCTAACTCAGCGTATTTAATCACTTTGTTTCCA  
GCCGGAGATAGTCGTATTCTAGAAAAGAATTTTGAAGGGAGATCTTTAATGTTGATCTTCAA  
GAAAACAGAAGATGGAAATTTTCATAGGATTGGAACAAGTAAGATCAAGAGCTACAGATTGT  
TCAGTAGCATCCATACCGTACTCTAGATCTTCGCATATCAATTTAATCAGAGGTCTTTTACTA  
GCCATGCCCACCTTTAGCTGGCATACTACCTCGAGTGAAAATAAGGATTATCGTTGAAATAAA  
TGCACATTTTGTCTGTCTGCAAATTACTCATCACAGAATTGAATTCTAATTCCTTGGATTGTTGT  
AATTTCAAAAAGGTACTTTGCCTCTTCTTCCTGATGCATGGCCATATATATGATGGCGTCAAG  
CACCAAAGTTCCAGCAGCGATCAAATTATGCACACTAACCGGAGAATCTTCGAGGATAGTG  
ACTTTGACTTCACCTGCTTTATAGGTTTCACCTTCAGGGATTGATGTAATATAATCATTCAAT  
ACTTTAACAACCTTTGTCAGCATCGAACTTAACTTCGATTCCCTGCATGACAGCATTTATATTC  
ACGCTGTTGACCCATCCTGTTTTTCGGAAGAGCCTTGGTTACCTTTTTCTTAGGATCTCCTCCTC  
CTGACGAAGATGCCTTGTCTTCTTTTTTCAGAGACCTTAGCAATGGCGCCTTGGAGTTCCTTCA  
TTTTCTGCGACTGTCCCGTGGACATTTTCTCAACTGTGATACTGGGGTTACTTTCTTTTTTCAGT  
GATCTCGGGAGGCGTCATACTTACTATCTCAAAATCGTCGTTATCGTTCAATTGAATGGGCA  
CATCACCATGGGCTTTAAACATCTGCTCCAACTTAGATAATCGAGACGATACGACTCTCTTA  
TCAGCATTAATTAACCTTAAACGCAGAAAGGAGAGGCGTGTGAGAGTCTGAACCTTCACCTGA  
CCTAAGGCGCTTTGCCATCAACAGGATATCTTTCAGCATTGTTCGTAGTCATTTTTGACGATAG  
GCGCTATACCCTGAATTTGTGTAGGAAGA

>Seq76 [organism=Ranunculus white mottle virus\_hele] RNA1 genomic sequence

TTTGAACCTTCGAACCCGGCGAGTCGCAATGACTGTAGTAGCAAACCTTTGAATCCTGTCAC  
TTGTCCTATGAATTTTGATAGCCAAATATATAGTTAACTATGTTAGTATTCTTCATTATCATC  
ACAAAACCTCATTATCTCTAATCAGAGAAATCTTCTTCAATATCTGCCCATGCACCAATAATTT  
CACTTTCTCCCATAAATTCTGTTAATTTCTCAAAAGTGTCTATACTTCTGTTAATCTCCATTTCT  
TTCTCTGTGGCTCCTAGTCCTATATCTAGTGCACCTTATGTCAGGTATGTTTGTATACTTTCA  
TCAAGTCTTCTAGAAAGATCTGATATTGCTCCATTAATAATGCCCTACAAAGGAAAAGTACTC  
GGTATTTATTTCTTGAAAGAATTTTTCTAGCATCTTTTCATCATTCAATTGATTGTGATAATCCT  
CTCAGGTCCAATGATATCTTCTCTGCTATGTTTGACCATAGCTCTTCGAATTTTCTATTAT  
CTATTCCTAAAAAGTACGGTTCAGTATACATAGATCTGGAAGCCAACATTATTCTATTTCATAT  
AAAGTTTGTAAATGTAAATGTTTGTTCGTGTGGTTTTGTCTTTATGGTCCAAAATTGCTTTTC

GTTTAAGATTCCCATATTAGCAACCACCAACAAACCTTCTATTATTCTTCCTGTTTTGAAAG  
ATAGTATCGCTTTTGATGCTATTTTCGTATGAGGAATTGATGGTTCTATCGATTGTTTTCTTGA  
ACTTCTTAATGTTGATCATGTCTGTTATAGCATCAGAATCAATAACCTCTTCATTTCTGACA  
AATTTAAGATCAGTTTCCAGCATTCTATAGAATTCTTTTTATTGTTTTTAACATTCAAGATCTC  
TTCCATAAACTTTATCAATTCATCATTATTCATATCCGTCACCTCCCTTGACAATCACAAGATG  
ATCTCTTATCACCTTGTTTCTAACTTCTATTGTATCACGATCATCTTCTCTGATCTTTCTCCCT  
AGTTCGGTTAAGTTTTTCAGGCAACTTCCTATCCTCTCTCCAGTTTCCGTTACAGATGATTCTTC  
TGTCTAGTTCTTTTAATTTTTCTCTGTTTTTCTGTAATATGTGTTTGAAACATATACGAGCAT  
GTTATCTTTGAATTGATTCAATGATGTTATTTTATTCTTAATTTCTGACTTACATGAACATAA  
TCGGGATCTTCTTCTACCAGCATTCTATTAGTTTATCATCATTAATAATTTCCATGGTTGGAT  
CTTGAACCTTGCTTGGGTGGAACCTGTTATCACATTTTTCAAATCAACCTTTGATACTGCATTAA  
CCAAAGATGAAGATATAATAGATCTATTATAGCCCTTTTTCTCACTAATGCTAGATGTGTTTA  
TCATATCACTCTGTTTTGTGAAGTCTACTAGTAGATAAACATAACCAGGAGATTCTAATGCT  
GGTAAACAGACTTTCAATTCAGATCCTCTCATTTTCATCTAGCACTTTCTCATTTAGGAACTTG  
TTTAATCCATTTAATCTCAATATCATTTTCTTCTTTGCAATTCTCGCATCCCCTATGATTCCAC  
TCAAACAATCATGTTTGCTTGTAATATGAGAAATATCAAGCAGTATAATATTGTGATCAAAA  
TAGCTTATATAATCTTGTTGTTGAAACAGTTGAAACTAACCTTCTTGATGTCAATTCCTGGT  
ATCCTCATGACTAAGTTGTAACCATCTTCTCTTGAAATTGTTGTGTGTTTTATATTGCTTTCCA  
TCATCGCCAGATGAAAATCACCTCTTCCACCGCAAAGTTCAATAACACTTTTCATCTTCTTTAA  
TGAATCCATTCCCTTTCAATAATGATAATAGACCTTTTGCACTTGGATAAACAGATGACATC  
GTTGGTGAAGATACCTTTTCAGGGCTCACCATTAATGAACATGCTGTTTCAAATCCTTTCAAT  
GCAGAATCTATCCCTCTAGTATCTCTAAAATCTTCCTCTGAAACATTGATCTCAGTAAATTCT  
ACTTGCCCGTAATGCACATTTTCTTTCTTTTCAGTATATGACTTGTGGAGTTTAAGGTAATAA  
GAACCCAACCTCATCTGTTCAAACCTCAATATTGCTGATCTCATCACAAAGAATACTTGCCCT  
GAGTGGATGTCTGAGTAGGTGTAACCCAAAGTAGGGAATGAATTTACAATCATTCTGTAAAT  
TCTTTTATCCTTGATGTAAAATTGACAAACACCTTTCCTCATTTTCTCAAAATTGCTTTTGCTG  
TTAATTATCGTTTCGGTGCTTGTTTACTTGCAATCTGACAGTGTTGTTCTCTTGGTCTACCATCC  
TGTATGATAGTGAAGTAGACAAAATGAACAATCTCATTAAAGGCTTTCTTGAATCCGCTAGAA  
TAACCAAACCTTGTCATTTTCATCAGTCCATAGTTGTTTTCTATTGAATTTTCGTTACACTGA  
ACATTTCTTCATAAAGAAGTCCTCTGATAACAGATCGTGAAGGAGTTTCATTGCCAATAACA  
TTTAAAGACTTATAGTACCTGTAGAACTTATCAAAGAATGTCATCCTACCCTCCTGAAGATT  
TCTTCTCCTATTAGTCCTTTCAAGATATCATCTGATACTAATTCTGGACTAACTATCATTGGT  
CCACCATATAAGAGTGAACAGACCTAAACGCGCTTTCCTGATTCACAAAATATTCTTTAGTT  
GTGGAAACATGGTTTATGAATTTATCTGCTATATCTTCATTCTTTTCAACAAAAGTAGAATAA  
TTGTAATACATTTTTCTCTTTCTTTGATCTTCTTCTTTGAAGCCATCTTATATAATTTCTTATC  
GACCTTTATTTGTTTAAATCCTTTGATAACAAATGACACGTCCTTGATATGCTCAAGAATGTC  
ATTAGTTAAAGTCAAAGGAACTAACTCCCAAGCACTTGGTTCTAAGAAAGCCAATCCTATTC  
TGATATAAATCATTAAATATTGAAGGTTGAGATTGTTGTCCACTCCTCCTGTTTTTGCGATAA  
GTTGATCAACTCCTGTTATGTCATAATTTCCGCTCAATAGATTGGAGGAAAGATCTCCAGTCT  
TTGATTGAATCCTCCTGTTAACGCTCTATGAAAATATCTTCCACTTTTGGGACAGACAACAT

TTTCTTCTATATCACTGTATTTGGCATCAGTAAATGTGTTCAAAACTGTGTCACAAATGGAAA  
TCAAAGTTGTCTTATCAATTCAGACATTCCTGATGAAAATTTCTCTTGTTCCATCATAAGCC  
ATTTTACGTACCTAACCAAGTCATATGCCTTGAAGATTAACCTATGTTCGAACATTCATCTA  
CGCCTAATTCTCTGTCGAACCTTAGCAGAGTTGTGGAAAGTTCTTTGTGGCGGCCTTGCTTTTC  
TTCCTTCCTCTGTTAATTTAGTTGTGCCTTTGAATATCGGTTGGATCATACTTTTGAGATTTGA  
GTGTACAACTTTTCCCATAATCGGTATTTCTCTATTTCTAAGAATTCAGTGATACAGATTC  
TTTGTGTTGGCAAGACCAATGCTTTGTTTCCTCTAGCAAACATCAAATCATCATAATTTATGAT  
TGTGTTAGCATTAAAGTTTTATTTTCATTCTAAAATTCGCCTGCCATGCCTTGTCATCAACAT  
CATCATTTTTCTTCCACCAAGAAGCATCTTCATTGTTGCTGCATTGTCTATCTTTGACAAGATT  
TCTTGACATACGCATATAAGCTTGATTCTAAGAACCTTACCTGTGATTCTTGATGAGAAACA  
ATTCTTAAATGCTGAAACCAATTGTCCTTTAAATTCCAATTCATCTTCTCGAGTATAGAGTGA  
CAAGAAGTCTAATAATTCCTTGTTTGTAACAACTCTCGATAATATTCTTTCAATTTCTGGCCT  
TACAAAAGTGATGTGTCTTTTCTTCCCCCAATCATAGGAAATGGATTGTCTAGGTAAGTGA  
TAGCATTCTGTGAAAGATTGATTAAGGAACCCATCTTCTTGACGTTTTCAACTTTCAATATTC  
CTTGAGATAACTTATTCTTTTACATTAGACAACTATAGCCTGAAATCAATACGTCAGGC  
AAAGGTGTTAGAGCAAACCCATACATTGTGTATGGAGAGTACAGAAACATAATAATGATGT  
CCAAAACATCCTGATCATTTTGGTGGAAGTGGAAAAATTCAATGTTTCTTGACCGAGGTGCA  
GGTATAAACACTTTGTTATTCACATTCTTGTTGAGCCCTCTCAATGCTGATTTCATGCTGATC  
TCATAGTTATGTTTGCTTGAAAGATATCTTTCATCAAGGTTATCTTGAGGATTTTCTTCAGTC  
ATCTTTCTCAAAGAACTTGAAAGCAGTTTTATGATGCGGAAATTCCTAAGCAATGCCTGTGT  
CCATATGGTTGAAGATCTAGTACAACTTGAGGTGAAACCCGAATCAATCAAAGTGCTAGATT  
CTAGTTCATCACAAAGAATCTTAGGACCATTAGGGCTGATGGACATCATCTTTTTCAATGTC  
ATTCGATCGGGATACCCTTATAATAGTGTTCTTCAACATAGAACATCTTCCATTTGTGACT  
TGAGTTTGTGAAAGCTTAACAATGAGTCCCATATCCTCACCACATCTCTGAACATTCTTGATT  
ATTCCGTTTCAAGTTTTGTACATCCATAGACCTTTGAGTAAACACACCACATGAATCATCAGA  
ATAGGTTGTTCCAATAAAATCCTTGACACCTAATTGCATAAACATATCTTCCAGCATCAACT  
GAGATTGAATTCCCCATAGACCCCCTAACCAACCTTCAATTGCACCCAATTGTCCTTTTGAAT  
AATAGATCATATCACTCCATGTATCTTCCACTATTAAATGGATGTTACTAAAGACATAAGGC  
AGTGAAGTAAATTCTTCATATTCAAGCGATCCCTCAAAGTAACCGTACATATTGGCAATTC  
TTCCATTATAAAATTTGTATTTTTCAGGCCTTTGAGACGTATTATGACCTGAATAATCCAAAAA  
GAGGGAATATGTATCCTCCTCCAATAATTTTCTGACATTTTAAACATAATTTCTCTTCTTCA  
TCATCTGTCATGGTCATCATTTGTCCAGGTAAAAGTTTCATTGCCCTTTTTACCATCTCCATTG  
TTGAACTAATCCAGAGCTTTAACTTGAAAGAAGCAATGCCGTAAAATCTAGCAGCAATCTTT  
TGTTACGTTCCCTTTTCTGAGAGTTTGACTAACATATATTTTCTATGTTTTTCTGCAGACCTT  
CAGACCTATGGATTACTTCAGCAATTCTTGAGGATGACCTGTATGCATTCTTTTTGATCCCCA  
TTGGTTTCAGAGAAGACATCTTCCATGTTATGAGTGATATAATAATGAATTTCTTTCTCAGAGT  
TACTTTCTTGGAATAATTTCTTTTGAGCAAGCCTTATCTATTATTCTTGACTGCAGATTCAT  
TTCTTCACCAGGCTCCAGAACTTGCCTAATTTCACTTCATCATATCTGCTAGTTTCAGATAT  
CATCTGATTTATATAATTACCTCCTGCTGCCTTCATTTCTAACTGAGCACCCAAATCTTCAGG  
AACACTTACTAAGTTCGGGACTCTTCCGTGTTTTTAATGTAAGCAGAAATTACTCTTTGTTT

GAATAGAGACCTTAACCTCCTTACCGTGTTTTCATTAACCTATGTTGTCTCGATTTGTCCGTTG  
GGTATATCTACTAATCCCTTTCCCTGGTTTTGTGCTTGCAATGATCAATGTTTTCCCTATGGA  
AGACATTCTGATACAAACCTCAGGCTCTGATTCTTGACAGATCTCAATGAGTTTTCTGTATG  
GTTGAGAGAAACATTAATCGATTCTACAACATTATCAAGAATTGGCATACTCGCTGAAAGAG  
TTTTCATGTCAGAAAGAAGAAGACATGTTGTTTCATAAAGACCTCCCATTCTATCCTGATGT  
CTTCGGGTTTCATACAACAGACTAGTGTAGTAATCCAAAACTTCTTTTCAGATTCTGACATTT  
GGTTACGAACGATGCTAAGTGACAATAGATTATCTGCTAAGTATAAGCTGTACTGTAGCATA  
TCAGGTCTTCCCAAATACACTTGAGAACCATCGTCCCAATAATAAGCACAAATTGTAGAGGA  
CAAAAAGATGATTAGATATCTTCCCTCCTTTTCAAACCTCGACTTTTGAGATTGAGGCTCCTAT  
GGGAAAATATCGAGTGTTCAACCTCTTTCCTTCATAATGTTCAATGCTTATGTCCAACCTCACG  
ATTGTTGTGTTTGGCACTGGCGCTCCTCAATATGTTCTTGTTTAGGTGCTCAAAAATATCCAA  
GACCCAATAATTTTTTGCAGCATCTTCACTAATTTTCATAAGACATTTTTGTTCTTTTCTTTGTT  
CCTAGAAGTTGTTTTTCCAGGAGAGAGATTTTCATGGTTTATTAGATTTCCGGAAAATTTCAAA  
AATACTCCTGATTTCACTAGAAGCAAGACTGAGTTTCTTAAGTCGTTTGATGAGATCTATCGA  
ACCCTTCTGTCTGAGTTCAGGGTTTATAAGAGGAATACAATCGTCTCTTGCTTCCTTGAGGAA  
AGTTTCTCTGAACAAAAACAATTCCAACATATTCTTTTCTGACCATTTTTTCGGAAATTGTGA  
ACCTAAAACAATAGAAGCATTGTGTTGAGTGATTTCCTTATAAGGACTGTCAAGTTTTACTA  
AAATACACGGTGTCCCTATCTTATTCATGTTTAAGAAAAAGTCTTTGCTGCAGTTTTTCAGGT  
CAACAAGTTTATGTTCAAAATCAATTTTCACTTCATCTGCTTCTTTCTCTTCTCGTTTTTAAT  
TGTTTGAGTGAGTACATCAAAGTCATTGACAAATTTACTCATTACCTCCCTGGTCGATGGTGT  
GTCACAATAATTGATATTTTTCTCCCTAAGATATGCTTCCATTTGATTTGCTCAATTTCTACTA  
GTGTTATTGGTTCAGAGTTACTTTTTATTTAAAACGAAGAAAAACAACCTCAATTCATGATTT  
GTTTCTTCTTGATTTCTTTGTACTTTTTGTCCCTGTTCTCTTTTATCTTCTTTTCCCTCCAATGTTA  
GTTTCAAACCTATATTTGGGCGGTGTAACCTTCATTCAATTATAATGAAGATTCTTCTGTCTTTCA  
TAAGCAAAATTAAGTCAGATTTATAAACTCTATTATAAAATGATTTCATGCTTCTTTGAAAG  
AGTTTGCCAAAGTAATCTCAATCCCCTTATGAATATCACCATCAACAATTTTCCCATGTGTTT  
TGATGATAATTATCCCTTCTTACAAAAAGGATTTTCGTTCTCTTCAAGTGTCATAACCATG  
AACCATAGAGAAACCTATTCTCTTCATTATAACTAGTTTTATACTCAACAAAATCAGCAAGA  
ACTCTCTCATTTCTTTCTTTTATCTCTTGATCAAGATGCACTATTTCTTGAGAACAAAACCTT  
TTATTCCAGTCATTTCGAATTCATTAGTCATCCTGTTATTATTTTCTTGTTATATTCTGATAAG  
ATTAACTTTTAATATGTGAATTTTCGAAAAGGTTTA

>Seq77 [organism=Ranunculus white mottle virus\_hele] RNA2 genomic sequence

AAATTATTCTCTTTCACACTTGGAATGACCTCGCCGTCTATCGTGCTAATCCCTCATTGAGCG  
AATACGAACACGGTGCGATGACTACGGCTCATTCCGTAAAAGAGTGAACCCGGACGGGCGG  
GCCGCAATGGCCTTAGTAAAAATGGATTAGAATAGGAATATAATTCCTACCTTCTCACCCAAT  
GTGTTTATTTAAAACAAGAACACACCACACCGAGTACAAATGACAATACCACACACAAACA  
AGCGATAATCAACAAACCAGAACCAAATCTACTTTCTATGAAGTCTAAAAGACACATTACCC  
CATATAGGGTATCACTCAATGATCATTTTTACTACTGGAACCTATCGGAAGCATCAAAAACATA  
ATAAGCTCCATCGTGAGTCAGACTGAACACGAGTTGATCATCGAGACATAGAGTGGCCTTGT  
TGTTTGGAAGAGAATTAAATTGATTTATTATTCCCTGATTCAGCTAACTCCGATATGATATTA

GAGGTATATCATCTTTCTTACCATATAGGACCTCTTTCAGTCTCACCCAGTGAACGCCTAATT  
TGATCTCAACCCCATTTGAGACGATGGAAATTAGTGCCTTCAGCAAGATTATCACCTTGTGTA  
ATCTCTTTTAGTTCAGCAAGGTCTGGATTGTAAAACCAGTGATCAGGGGCACCTGTATCGAG  
GATGATTCGGTCACTGTTTGTGAACGGGAGTCTTCTTGAAGGAAGCTTGAATGTCAGAAT  
TATAAAGCTGCAAGTCATCTGCTACAACCTTTCTTTCCATCAAAGAAGCCAGAGTCTATCCTAT  
TAGGTTTCTTTTCATTGGGTAAATCGAAAAGGATTGGAGCAAATCTCCTTTCTTCTTCTCAT  
CCTCTTTGTCTTTGTTCTTCAAAAATTTTCCTTTGTTCTTCTCTATCCGGGAATTCACCTCTTTC  
ACAAGACCTTCTATACTTGATTTCTTTGTTATATCAACCGGGTGCTCTAGCTCATCAATCAAT  
AGGACAATTGGTTTCTTCTGAGCGATAGTAACTGGTATGAAGTCTCTTTGAATATAGAAAGA  
CAGACAAACAAACGCAAAAGCTCGATCCTTCACAGGAACTCCTTTTGCTTTGTACCCAAACT  
CTATCACATTCAGCTTTTTCTTGTCAACAAAATATGATGAATGAAGTTCAATCATACTCATCT  
TGTTCAAGGAGCATCTGCTTTTGTGACAATCTTTGAACCATTCTAATTGAAGTGTCTCTGA  
TAGAAAACGTGATTGCTTGATCTTGAGCCAGCTCTCCTGAAAATAAGGGAAGATAGAGGATT  
TTCAGCCTGTCCACTCTGTAATAAGGATAATCCTTTCCAAACAAAACATTTGCAACAGTCTTT  
AGTGTTCCTATAGTAACTTTCTGTTGATCTTCTTTCACCTTTCAGTTTTATCTGCATCGGGGAG  
ACAACTGATTGAATGTCACCTCTGATTGCTTCTTGAAGTCTGCAGCCATACATTCTACTTCT  
GGACTCAGATTTTCTCCCTTGAGTGATGCTAATATAGAAACACCATCTTCTACCATATCCTCT  
GCAGCTTTCCTAAAAGAGACAACAGGATGACTTGAGGTAGTTCTAGTTAATTCTCCTGTTCT  
CTTCAAGATCCTGGAACCTATTCTTGAAACAAGGTTGGACTGAGATGCCATGGAATATTGAT  
TGGAGATAACTTGCACTTTAAGAAGATTCGTCTCTTTATGAGCGGATAGGTTTCCTCTTGAAT  
AGCTTAACATGTAC

>Seq78 [organism=Ranunculus white mottle virus\_hele] RNA3 genomic sequence

TTTTTTTTTTTTTTTTTTTTTTTTATTTAAAGCTATCTTGTGCAACAGAGAACATTCCACTCGTAAT  
GCCGTTCAATTTCTAAAATCGAGAAGCATTGTCGCTCATGCAAACCTATTCTGCCAACTTTCAA  
CCTTTTAAGTGGTCAAACCGTATGCTGCCTTCACAGCTTCCATGGATAACTCGGAGAAATCA  
GCCTCTGGATTGACAACACAGGAAAATGAATCACACCTAAACTGTTTTCTTTCCCGTAAAT  
GCTATCATCTCTTTTGAATGCTTCAATCTTCTGGTCACTATCAACTTCCTCATCATTTCTCTT  
CCTTCGGTTGAAAGAGCATATACGATCGCACATGTCATCTGGAGTGTGAAATTCTTCCGAGA  
TGGTCTTTTCGGGTGAAAGTGGGTGCATCCGTTTCTGAGCATCAAAGTTTGATCCTAAGGTAC  
ATAGTGTGTTCACTATGGCTTTAGCTTTATCGAGTTTCTCATTCTTCTTTACATACTCAAGCAT  
TTTTGTTGCATCCGTAGGAGCTGAAATCATGTCTTTGGGAAACTTCTGTGCAAAGATAGCAT  
ATCTAATTGCTTTATTACCTGCAATAGACATCTTGCATCTCGAAGAACTTCGGTAGGAACA  
TTGTCAAGCGAGATTTTATAGGAAGACTGAGGCAGGAAACAAAGAAGGATCGGCAGAAGAG  
AGATGAACACACAAATCTTTTGTCTCCATTTTCGCGTTATTGAATATTGTTTCTCTAATGAAC  
TTTGAAAGGGTCCTTGATTCAGATGACTTCTTTGGCAAACCTCCTTGATTATACACAAGGCA  
AAATGCTGCTTTGACTGCTTTATTGCCAAAATCAATGTTCTCAGAAATGGTTTTACTAGATAG  
ATGAGAAGGCTTACTATTGTGAATGGTGAAAATGAATTGATGCTCAGCAGAATCCAAGTAG  
GACAAGTATAATATAGCATCGAGAACTTGGTTCCAGCAGACAAAAGAGAACTCACACTTA  
ACTCGATACCTTCAAAGTCTTGATCTGAATTTACCTTCTTTGTAGGTCTCAGCACTTTTCG  
GGATTGTTTTTACATAGTTCTCTAGAGTCAGTCTGATCTTTTCTTGATCTAACGAAAATTTCTT

TCCATCAATTATTTTGTGAAGTGCTTCAGCAGAAAAGACTATGTCCGCAACATGGCTAACAG  
ATTCAGTTGGTTTAGTTGTGCAACTTTCTAAGAACTTCAGTTTCCCTTCCTCATCAAGATACA  
CTACCGCAAATGGTGTCTTTGCTTCAACAGCTCTTAACTGTTTAGTCTTCTCTTTGTTACCAAT  
CTCATCATCATTGATCAAACTAAGGCTTTTGAGAATCTTCTTATCCTCAATATCCCAAGTTGA  
CTTTCTCACGATAGCCAACACCTGTTCAACGGTATATTTGCCAGACATACTTTGCTAATTTTT  
GAAAATTTTCGAGATATAAGATCTTTAATTGTGAGTTCTTGAGTAAGTGAGACGTTTTGCT

>Seq79 [organism=Ranunculus white mottle virus\_hele] RNA4 partial sequence

CTCTGTACACCTTGTCAAGTTAAGACGGGGTCAGAGAAGGGCCAGCGGAATGGAGGCCAAC  
GGCAGCGTTTAAAAGAACGAACATGGTTAGAGGGAAAGAAATTACTTTAAACAGTTAACGG  
CANNNNNNNNNNNNNNNNNNNNNNNNNNNNNNNNNNNNNNNNNNNNNNNNNNNNNNNNN  
NNNNNNNNNNNNNNNNNNNNNNNNNNNNNNNNNNNNNNNNNNNNNNNNNNNNNNNN  
NNNNNNNNNNNNNNNNNNNNNNNNNNNNNNNNNNNNNNNNNNNNNNNNNNNNNNNN  
NNTCATTAAATTGCTGTCAAATGCGCTTGTTGTCTTCAATACCCTCAGCATAATAGAAGACTG  
GATTGTAACCTTGTCAAACATGGTTGTCAGTCTTCAAAATTCTCTCTATGTGTTCTATCATG  
ATAGATCTCAATCAATAGACAGTAAGTATATTTGATATTGTAATAATAGAAGTATGATACATGA  
ACTTATCAGTATGTATTCCTAGATCATTAGAGAAATAATTCATAAAGGTTATTAGGGTAATA  
CATTCCCCTGATCAGGTGTTCTAATACACTTTATTCTTCTGTTGATGTCGTTCCCAGGATGC  
CTGTGATTCTGAAGCAAGTTGTCAATTCTTCTTGGATTGTAATGGATCAGATAATCAATTCCT  
TTCTCAAGATCTCTGATCAGACTCTCCTTGATTGGATTGTAGAAATAGACTGTTTCATGTAAA  
GAGAGTGAGTGTTCCATTTCTTTCTTGAAGAAGTTTAGGAACCTGTTTGTTGCAATTGGAGTA  
AAATTGGAATCTTTTTCCATAAATTCTTCTAATACTGGTTTTATAAAGTCAGCAAGGAGCTTT  
TCTTCTAAAGTGTTTAAAGTTCAGATTGTACTTTTCAATTATCATTCTTCTTTGTTTTGCATCAA  
GAAGAAAGTTTTGATGCTCGGGTTCGCCTAGGTATTTGAATTTTTGGTCAATAAACTTGATCC  
TATTGGTCAAGTTGTTTTGATCTAATGCATCGAGAATGTCTATCCAATTATGGGGCTTAAAG  
CAATGTTGATGATCTCCTTAATATGAGGTATGATAGCCATTGCCTTACAAACCAGAGGCTCC  
AACATAACTACCCAATATGCAAAAATGTTCAATTGTGCGATGGTAATATTCTTC

>Seq80 [organism=Rhododendron ophiovirus] RNA2 genomic sequence

CTGCTCATCCATTCTTAAGGGAATTATGATTCCATGATTTGCCAATCCCTACGCAACACGAA  
GAATATCTAAAACGAAACCCCGAGAGGCGAAACCCTAACGATGTCACAGTCGATCTTTAGG  
AAAAAGCCAAATTATAGAAGCTTTTTCTAAAGAACTGATAAATCGTTGGATGTCACCACCCAA  
GGATGACCCGTTTCCAGGGGAGCGCATTGCTCCTGGAAGAGGCAAGCCTCAATTCAA  
CTTTGCATTTTATTTAAAACGATTCTAGCCAAAATATAAAGACTAGTAATCGACGACACAAA  
AGGTAAAATTCATTAAACAATTCAACAAAACACACAGGACACAAAAGAAACACTCATACT  
AGAAACCAGATAAACGAAATTATTTAAACTCGTGAAACACACTTAACTGTAGTGACATTTTG  
AAGATTCAAAATACCAGTTTCCCAGCATCATCAACACTGAGTTCCCAACAAATCTCCCCATT  
GAGATAAAGAAGACCCACCTCTTTTGAATTGTCAGCTTATCCACCAGACCTTCCCTCTTTAA  
CGCTGCAAGTGACACTAGATCAAATCCCATATCGGCAGTCGTGATTTCGGTTTCTGTGAGGA  
TGACTTCATTCTTCCGAGCCTGACGCGAACTCTTGGAAGAACTTTGTAAGGAAGATCGGAC  
ACTCCACCGACATTCTCATAACTTTGTCAGTCACTATATTTGGTTTGTAAGAGATGACCG  
GGCGCACCTGTGTCCAGCATTTTCATGTTTGAATTCTCGATCGAAATCACAGCCTCAGAGGA

TGCAACTTTTCGGTTTCATGAGAGAAGATAGATCAGCAGACATTTGAGACCGGTTATCTTCTT  
CATCTATGCTTTCCTGATCAAACATCATCCTCTTCATTTTCATCCTTTATTGCTACACTCTTCAT  
TTTCTTGTTCAAATATTTCTTCTCCTCCCTTTTTATCTTCTTAAAACTTGCTTTCTTTTTTCATTA  
CGGATGATTGGACAGCATCCCCCAATTGGGAAAATACAGTTTTTTGAATTGATGTCTATTGGT  
CTATCTAGTTCGTCCAAGTAAAGGGTTGTTGAACTCTTTTTCTTGAAACTTGCACTGTTGAAA  
TCTTCGTGCACATAGAATATCACCATCATAGAACCATAATCTCTATTGGTGATCTTAATCCCT  
TCTGCAATACATCTCAATTTTATCTTGTTTCATGTCAGCAGCACGAACAAAATATTCCATGCTT  
AACTCATTTAATGACATAGAGTCAGCTCGGATCAAAGTGGAATCGATTACTGATTCCTCATC  
ATCATCATATCCCTCATCCACCAGTTGTATTTTCGATTGTGCCTCCAGGTTGCCCTTCTCTATG  
ACATTGTAGTCAATCTCTCCTTGTGTCTTCTTTCCCAAATTGAAGTACAGGCATTGGATTTTG  
TCAAACCGAACAACACGGTTTGTGCTGTCCAAGAGTTCCTCCGCTGATTTTCTTTGCTGCGTTG  
AGAATTGATGATAGGCTACCAAGACTTAACCCTTTTTCTATCTCGTCCTTCTTCATCCTCAAC  
GTCATTGGGCTCATCAATGTATGAATTTCCCTTTTGCTAATTGCTGCAAATTCAGCAGCCAGG  
CATTCTATCTCAGGGGATACATCTCCCATGTCCTTCATAGATATCACAGTTTTGATTCCTGAC  
TTCATCAAATCTTGAGTTGCTATTGCAGCAGAAAGTTTACCTATATTCTTAGCCTTCACTTTT  
CCATTTGAGCTCTTAACAGCGCTAACCCTCTGAATCGACGACATGGTTATCGTAAGTCCTTGC  
ACAGAGATCTC

>Seq81 [organism=Rhododendron ophiovirus] RNA3 genomic sequence

GACAGTTCAAACATGCTCTGCAAAACAGGTCACAGCATCTTGTAATAACCCTTCAGTGCTGC  
CAGGCTAAGTGACCTAAATCAGCCCGAGCATTTGTGAGAATGGGCCATACACGTTCTTCGC  
CCATCACAACACCGTAATATCCAGTATCCAAAGTGAAAGCAGAGTTCCTTTCATCATCAACC  
TTTCTCACTAATTGATACCTCCCCACCACAGACAAATTCTCTATTATCGCTCTCGTAAGCATC  
AAAGAAAGATCCTTGACCACTGGTCGATCTTTCCGCTGTGGATGCATCCTGGCCTGTGCGTC  
TGTGTTTCCCTGAAGACTAACCAAGAAATCAACAATGCTTCTTGCCAGATCTATCCTCTCATT  
CCTCGTCATTGCCTCTTGAATATCAACTGCAGTCATCCCTTCAACCACAGTTCTTCTAGCTTG  
CTTTTCACAATCAGCTGAATATATGGCATATCTCACAGGCCTATTTCCAGCGACAGACAATTT  
GCACCTTGATGCGACACCTTGATCTAACTCGGAAATCTTTACATCCAAGAATACAGAACAAG  
GAAATTTAGTGTTGACGTTGAGGAGAGTTGCTGAGCAATCTGCAAATGATTCTCAACTTTT  
CCTCCATATATGTAATTCCTAACAAATTTTGACAAAGACCTCGATTGTGTAACCTTCTGACGGC  
AGGCCACCTTGCGTCCACACTAGCACCAGAGCAGCTAGAATTGCCCTCCGTGCTTCCTCTAA  
ATTCTTAGAAATGACCAAAGAGTTCAATTTGAGACAGAGACAAAGTGGAACATGCCAACCC  
TTTGTTTCATCTTCAACCAATGCACAAAACAACAACGCATCCAAGACCTTCGTCCCTGCTGC  
GATCAGCAGCTCGGGGTTTTGCTGAGCTGCCTGGTCGAAATGCATAATTTTAACATCTCCCTT  
TTTATAACCTTCACCCTCCCTATGAGACTTCTTGAGAAACGTTTCCAGTTCTTCACGAATCTT  
CTTCTCATCTAACGCGTAATTCGATTCACAAACCAAAAAGCTGTGCTTCAGTAGAAGTTGATA  
CAAATTCTTGTTTTATGTCATCTCCTATTTTCATCTTTTTTTTACTTCTTCAGATGTGCTGCCCTT  
AAGCTCACAATGGAGTTCCAGTCGAATGTTTCTCTAATTTACCGGCAATCAAGGACACCAC  
ATCCGAGTTCTCCAAGCTGACCAACAGTTGATAGTTATCAGCGCACAGACGGCCAGTCTTGT  
CAGTTATTCCGTACTTCTCCAACAAGCTTATATCTTCTCCACTGGGAACACCTGCTTTCCTTCT



ATCATTTGCTTTGATCAAATGTTCCACCTGAATGCGATCCATAATGACGTGAACAAGTTCAA  
ACGCAAGAAAATTAAGATCGGAAGAGCACAC

>Seq82 [organism=Silene ophiovirus] RNA1 partial sequence

TAGGTGACTAAATAGTCAAGTATTTGGATTTTAAGGAATTGATAATTTAACAATTTAATAAT  
ATTCATCCTCATCATAATATTCTTCAGCTAACATTTCTAGTAATATATCACTATCATTAATTAT  
CTCTTCCATTCTTTTCTTGTTAGATTCCATTTCTTCTGGACTGCATAAGAAATTTTCAAAAATG  
TTTGTGTCAAGCGTTATCTCTAATTCTCCATTAGAGTTCAAAATATAGTGATTTTTTCATTTTGT  
CTCCCAATTCGTGAGATATACTGTCAAAAATTCCTATCCCTTCTCCTGAAAAATATTCTTCAG  
TGCTTTTATATTTTTCAAGCAATTGAAGTATTTCTTTGTTTATGTTATTATTGTTGTCAAAAAC  
TTGACCTTTGATTTCAATTTTCTATTCTATTGAACCTGCTAACAAAATTTTCATTATTTTCTCTT  
CTCTTTATGTATGAATAATTCAATAATTGTATAATGTTAATTACTCTGTTAGCTATCAATTTAT  
AATTTACTATGTTATTTTTGTTAGTTCTTGTTTTCACTTTCATTAAATTTTGAAGTTTCTTTCT  
TCTAAATGAGATATAGTCATTAATCCTTCCATTAATTTCCCTTGAGCAACGGCATCACATACT  
TGATGTGCAATTGTATACAACTCTCCCTACCAGATGATATTCTCTGATATTTTAAATTCCAC  
AAGTCAATTGTTTCTATGATATCAATACTTGAGATTTTATTTTTCCATTAGTTATGTAAAC  
ATTTCCCAAATGTCTCGGGTCAGGTAATTTCTTTCATTTTCCAGAACAATTTGTGTTAACTT  
TTAAGTTCTTGTTCTCTAAGTCTTTGTAACCCATAACAAATGTTGAGGATATGATTCAAGT  
TCTTCTTGAGTTACTAGGAATTCTTCTAGATTATTATTTAATGCATTATTTATTATCTCTCTCA  
GATCGGATTTTCTGTTTTGTTACCATCTGAAATGAGTTTTACATTTAGTATTTCTAATTTATT  
TTTGATAAAATTCATCTTATTTGTAACTTTGTTATAAAATTTAACTTCAAATCCTCTTTGCTC  
TTTATTTCTCTAATGCTGTTGGGAACTATTATTTTGTTTTCTTCGACACTTTCATTATGTTCA  
CTAATTTCTTATTGCTTAGAAGTTCTTCTGTGTGATCAGATATTTCTTCTCCTTTGCTAAAATT  
GCACTTGAAAGTCAAGTCTTTTGTTTTCATGGTTAATTTTTCTAGTATTATTGAGTCACTAAA  
AGACTTGATTTCTTTTTCTTGCCTTTATATTTTTCCATAGAATTTTGGATGGATTTATTAAT  
ATATAAATTAGCCCATTTGAATTAACCTCTGGTATTAATATGGATGTTGCATAATTTTCTCTG  
CTAATCAATTCTATGAATGGTTCAGAAAATCTGTCTGATGTAGTGTTAATCTTATAATTGTT  
TTCATTTTTTGTTTTAACCTTCCATCACAAATTGCAAAAATCATCATCCTTTCTGTAAAAAT  
GTGATATATCTAGTAATAACAATCTCCTACTAAATATCTCATGTAATTTTCTTTTTCAATC  
CATCCCAATCTTTCTTTTTCTCTATCATTCCTACCATCCTATTAATTAAATTATAACCATCATT  
CCTAGAAATGCTTTCATGTTCTATTTCTAATTCTGTCATTGCTAAGTGAAAATCTCCTCTTCCT  
CCGAAAAGATCCACTACTTTTTTGACATTGTATTTTCTTTCATTCTTTTCATTATGTTTATTG  
CACTTGAATATACATCACTTTTAGTTGGTGATGAATACTTTTAAACAGAGAAATTTAATGAAC  
AAATATATTCAAAACCTTTGATTGCTGCTCTCATTCATCTTTATGTTGTAATTCCTTAATATT  
TAAACTGTGTTCTTCGTAAGATGTTTCTTCATATTCAACTTGGTTGCTTTTTCTATATATGAT  
TTGTTTTGTTTTATGAAAAATTCTAATTGCCTAAATTGAGTAAATGTTTTCCCTTCTAGTTTCGC  
TGATAAATTATCTACAGAACATTTAATGTCATCAAAATCATATGACATTAAAGGCATGCCA  
TATATTATCATTTCGGCAATAGTTTTGTCTTTTATATGGAAGTGATGATCTCCAGCTCTCAGA  
TTTTTTATGCTAAACATTGTGTTTCTTATTGTTCTCTCTTTGTTAATATGAATTTTAATTTTATT  
GTCATTTTTCAGTACTTATTGTGTATATCATTCCGCATGATATAACAAATAATCTTAATAATTC  
TTTTCTATAATCTAAACTGAATCCTTTAGTTATGATATCATTACACCACATTTCTCCTTTTTCA

TCTTTTCGGAAAATTTCTCTGTTTAATAATCCTCTTATAACAGCTTTCTGAGGAGTTTCTTTTC  
CGATGACATTCAATGATTTGAAAAATTCATAGAATTTGTCAAAAAATAAATCTTTACTAAGA  
TATTTTCTTTTAAATGTGGTATCAATTGCAACAAAATATTATCGTTAATTATTATGGGAGTT  
ATTATATTTTGATCCTCCATGTATAGCTTTATAATTCTAAAATCACTTTCTTCAACTATCAACT  
CCTCTGGTACCAATTCTTTTATGCCTATGTATCTCATTTTCAATTCTTCATCAGTGCTAATGAA  
TGTAGAGTAATTTTGTATATTGATTTTGCTTTTTCTAATTTTTCAGTGTTGAATTTTATTCTGT  
TTTGATAATTGTAACCTGGAATTTTAAATCTGTTAATTCAAAAGTCACATCTTTTAAATATG  
GTAATATTTTCATAATCTAAAGAAAGCGGTTGCAACTCCTTTTCTTCAGCTTTTATTATACTTA  
ATTGTATTTTACAGCTAACCATTAAATATTGCAAATTAAGATTGTTATCTTCTCCTCCTGTAC  
ATGTCAGCAATTTTCTATTCTGTCAATTCGTATTTTCCAGATTTAATACTCAAAGATAAAT  
CTCCTGTTTTTGGGTTGAATCCTCCTGTTATTGCTCTATGAAAATATCTTCCTCCTCGAGGTGC  
TGTTATACCTTTTTCAAGTAGTTCATATTGTAAGTTAGAAAAAGTTTTTAAAGTCATGTTGCA  
TGTTTCTATAAGAACTTTTTCTGTAAAGTAATTAATTTTCGAAAATTTTCCCAATTCATATAT  
AATCCATTTAGTGTAACGACAGATATCAAATGCTTGTAATATCAATTTTGATTCAAACATGC  
CTTCAATTCCAGGATCTCTATCAAATTTACCAACATTGATGGCTGCTTTTGCTGGTGCATTCC  
TCACAAGACCTTTATCAGTCAATTTGTGAGTGCTTCTGATTACCGGTCTAAACAATTCATATT  
CTTTATTTGTTTCGATCAGTCCCAATAGTGGTATTTCTTCAATTTCAATGAATTTTATTTTAT  
TTTTTGTCTTTACTGTAAATTTTTTTCAGTTTCATTTCTCAAATTTATCATTTTGCTATAGGAA  
AGATTAGGAAATAAGATTTTCATTTTTTATTATTTCTAACTTATGATTTCTCGTCCAACATTCAT  
GCCACGCTCTAGAAAACCTTAGATTTTCTGCAAAGAAAACCTAAAGTGCTTGAGTTTTCTACT  
TTACTTAAGAAATAATCTATGTAACCAAAAATAGAGTCATCTTTATATTTACTGACAATCCTG  
CTGCTAAAACCTGTTTGAAAAAATCTTACTATTTTCATCTGAGAAATTGTTCTCATTTTCTTTGT  
TTCCTTGTTTTATTCTTTCATTTATTTTTCTGTTCTTTGAAATTTTCGATATAATTGATTTTAAT  
ATATCTTTCATTTTGTACTTGTGTCAAACCTTCCTCCTGTTAATGGAAAAGGGTTATTAATA  
TATGAATGTGAATTTTTTGAAAAATTTACTAACATTCCAAATTGTTTTCTAAATGTTTTGGA  
ATTATACTGTTACATAACAAATTCTTTTATATTTGATATAGAATATCCAGATATTAAAGCA  
TCAGGCATGGGCGTTAAAGAATAGCCATACATGGTATAAGGTAAGTACATCATGCTGAGTAT  
CATCTCCTTTACTAAATTATTTTCTAAGTGTGTAAACATAAAAATAATTATCTTCATTGTAAA  
ATTTGGTAATTCTGCTCTGGAAAAATTTCTGTTGATCTTATTTTCATTTTGCTTATTTCTATC  
AATCTTTTATTGTTCTTTACTAACCCATTATATCTTTCATCTAATTTCACTTCGAAATTACTCA  
CAAAATGCCTAACATTCCTAATAGATATGTCTAAGAATTTTGCGTTTCTCAAATAGTCTGA  
AGTCGATGATTCTCACCCATAGAAGAAGATGATGTGTATCCTCCATCAATTAGTCTTGTCATT  
TCTAACTCATCACCCCATAAAGTAACTAGATAAATTACTTATGCCCATCATTCTCTTATAAGTG  
TTTTCAATTGGAGTGTCTTTCCAATAATGTGTTTTCAACATGGAGCACCTAATTGAGCTAACT  
TGAGTTTGAGATAATTTGACTAGTAAACCCATGTTTGAAGCAAAATCTTGACATCTCTTATT  
ATTTGGTTCAATTTATATTCGTCAATTTCTTTTTCTATGAAAACCTCCACATGAATCATCAGAG  
TAGGTTGTGCATTTTTTACTCTTGAAGCCTAATCTTTGAAATAAACATTCCATCATCAATTGG  
GATTGTATCCCCATAGTGCACCCAACCAACCTTCTATTGCTCCTTTCTGTCCTTTAGAATAG  
AACACTTCATCACTGTATGCATTTTTCATATATTATATCTATGTTAGAAAACACATATAGCAAG  
GATATGAAATTATCATACTTTTCTTGATCTTCATCTAAACCATACATAGCAGCGATCTCTCC

ATCATGAATAAGTTATTTTCAGGTCTTTGTGAAGTATTATGACCTGAATAATCAAGAAACAA  
GCTGTAAGCATTAGGATCTTTTAACATTATAGACATTTTCATACAAAATTGTTTTTCTGTCATC  
ATCTGTCATAGTCATCATTTGTCTGGTATTAATTTTCATAGCTCTCTTAATCATTTCCATACTA  
GATGATATCCATAAATTTTAAATGGAAGCTAGCAATTCCAAAAAATCTTACTGCTTCTTTTTGC  
TCTTTTTCTTTTCCTGCTATTCTTACTATCATATTATTTTTCATTGTTTTTAAAAAAGGATCTTT  
ACGATCAACGTTTTTTGTGTCCTATTTTCTGGAGAATTTAATGGAATTCTTATTATATCTTGA  
GGGTCTTTGATTTCTTCTTGATTTAAATAATATATTAATTCTTTAATTGAGTTCCCATTTCTCAT  
CATAGTCATCTTTAGTGCAACTTTTATCTAGAATTCTAGTTTCTAATGATGTTTCTTGCCCTAA  
TTCTAGCATTTTTTCCTAATTTTACGTCAAAGAAGTTTTTATGATTTTTTACAAATTCTTTTTCA  
TATACTCCTTTACTTGCCATAATTTCCAATTGATGCTTAAGAGTTTCTTCACACTCTTTCATTG  
GGGGAACTTTTCTACTTTTTTAATGTAAGTGTATTACAATACATTTAAACATTGCCCTTA  
GTTCTTCAATTGTTTCATTGTATACTGGATGGTTTCTGTTTGTCTTTGAACATATTTACTTAA  
ACCTTTATTCTTGTTAGTTTCTGCATAAATTAATGATTTGTACAGGCAACTCATCTTTAAAAC  
AGTTGGTCCATCACTCTTGTCAATTATCCTCAATAGTTTTTCAGTGTAAGTTTGGTTTATATCG  
CAAGATTCTATTAAGACATCTAAAGGAGGTAACCTTGAACATTTCCCTTTCATATCAGTCATC  
ATTAGACAAAATGTTTCAAATGTTCCACCTAAACCACACCTTACTTTACGATCTTCTATCCTT  
CCAATTTCTAATATGTAGTCTATAAATCTTTTTTCATTTTCATTACCGCTGTAATCTTTAATTA  
CATTCAATGTGAATTGATGATCTACTATTGTTGTTAGATAATCTATTGCACTTCCCGTCCCGA  
TGAAAGAATA

>Seq83 [organism=Silene ophiovirus] RNA2 genomic sequence

CTTGAACGTCAGATAGCCTTAAAGCTCATTCATTGATATCTACATCTTGAATTTACCTTAT  
TTTTTAAAAAACGAAAAAGCAACAACACACAACTGAAACAACACAAAATGCAAAATACAG  
AATTGAAAATTACATAAATGAAATTACTCATCAACGCCTCTCACTACATACATCCCATTATT  
ATTGTAACACTTGAATACTGCCTTCTTATTCTTCATTAAGACAATTGAGTTATTTTCTATTTTC  
ATGTCATCTATCATCCCATTCTTCTTGAGAGAATTCAAAGAAAGCAGATTATGCTTTATTTCA  
TCTGTGATAAATATGTCATTATGCTGATGACATTATTACCTATGTTACAGTAAATTGGATAA  
TCACAAACTTTCCCTAACACCTTCTTTCCATTACTCAATATCATTGAGTCTTTTGTCTTTTT  
GGTTTATTCCAAATTTGACACTTTGTACATGTCTACTTGCTCCAGTGTCTAAATACCAAATGC  
TATTTCCACTTGGAATCCAGCTCTGATATCATGTTAACACTTCCTTCTCCAATTTCAAAG  
TACTACTTATTTTCTTCTTCTCGTTTTCTTTCACCATCAATCCTTCTTCAATGATTCTAGT  
CGATTGTTTTCAATTCTTTCTACCTTGTTATACCCAATTCTTCTTGTTCACCTTCTGTTTTGAG  
ACTACTTCCAATTCTTGTCAACACATTTTCTTGTTAACATCTTTTGGAGCTTCAACATTATCC  
ATATAAACGCAAATTCCTTCACTGGCTACAGTCCTTACAGGATTCATAGTCTTGTGTTTTG  
AAGCAAATAAACATTGTTCCATAAATTCTTCCCTATCACAGGAACCTCAGTTGGTTTCACAAC  
AACTTTGATAAACTTAGCATCTTTAGTCTGAACTTTATAATCCATTCCAAACTCTGTATATGA  
CATTCTGTGAATATCAGCTACAGTTTCTGCTTTCACCTGGTCTTTGATATTCTTCATTGATTTA  
TCAACAAGTTTGAATACAATTTTCCATTACTCTCACCGTTTACTGTAAAGAGAGGAATGTA  
GAAGATTGTATTTTATTAAATTGAATGAAAGGCTTCTTGTTGATCTTAAACAAGTCACCTAT  
CTTTTCCAAATTTGATAATTCAAATCCTTCTTCATTTTCTCTTCCCTTCCAATTTATAGATATA  
ACATGAACACTTGTCTTTATCTCATCAGTGGACATGTTTTGAAATTCAGAGGCCAAATCTTCA

ATTGCGTCAACATTCTCTATGCCAGGAAAAGCCATTATTCCCTTAACTCCTTCTTCACTCAAT  
TCCTGAGTTGCTCGGCTGAATGAAATAGTTCCAGTTGCCTGAGATGAAGGATTTCTCAAAGT  
GCCACTGCTGAGTAGAGGCTTGAGAGCAAGGTTGACATAGCTAGATTGAGAGACGAGAGT  
TCACAGGTGAAAACCTTGATAAATATATGTTCAATTGAGTTGTCAACTGGCGTTAGATAATC

>Seq84 [organism=Silene ophiovirus] RNA3 genomic sequence

TTTTTTTTTTTTTATTAAAACGAAAATTGAAAAACAAACAAAAGAAAGAAAGCACGTAGAAT  
ATTGGAAGATGGATTTTTGAATTTTCAGTTCTTTTTCTTAAATATGTCTAACACTGCCTCCTTA  
GAATACTTCATGAAATCAACCTCCTTATTATCTAATATAGGCCACTGTCTAACACCAACCGC  
ATTGATAGTACCCACAATATTCGCGTCTTGAGCAAAAACCCCCAGCTTCTTAGTAATGATGA  
TATCCACTAAGTTTTCCCTTCCCTTACTATCAAGCTGAAACATGATTGCTTTAATGGCCGAAA  
GAACAAATCCTGGAGGAACATGCCTCTTCTTATTCAAAGGGTGAAGGTTTAATTGACCTTCT  
ATATTTGCAGCTTGTTCCACTAAACAATCTGATATTTCTTTACTCTTTGCTAATATCAAATTGT  
ATTCTATTCCTTTTACCATTTCTTCAGGTTTCATTTTTGTGATATCCCGGAGTTTTTCTTTGGA  
ATGACCAGCAGCAAGGCATGCTAGCCTTACAAATTTGTTTCCAGCAATTGATAATTTGCATC  
TACCTCCTACTTCTGCAGGTAATGATTCCAATTTCAATTTAAGTAATGCTTCTCCAGGAAATT  
TTCTTAGATTTGATCTAGATAATAATTTTGCTAGATCACTTTCTGTATCAATTTTAAATTCTCT  
GAATGAAAAATTTTCCAATACAAATTTCTGCAACGGCTTTTTAGATTCAATGGTTGGTAATCC  
TCCTCTATTATAAACCATACAGATAGCAGCACAAAATCCACTCTTCCCAATTATAAGATTGT  
CTTGATCTCATTTTTTGGTATAGATTCTACCGTAACAACCTTCAAAAATATCATTTATTTTTTC  
ATCATTATGAAATGCTTCATATAATGCAGCATCCAAAACACAAGTCCCTGCTGCAATGAGGA  
ATTCCATTTTCACTTCTGCACCAACAAAAGTGGCAACTTTCACCTCTTTTGGGACATACCCTG  
CCTCAATTTTACACTGAGGAGCGAAATCATTTAGTACACTGATTAATTTCTCAGGGCTAATTG  
ATATAGATTCAATGTTAACCATCTGAGAGAACGATTCTATAGTGTTGATAACCTCAGAATGG  
CCAGATGGAAAATCTCGCATACTGGAAAAACCTAATTTATTTTCCCTCTGACGGGGGTACCTG  
GTCTGCCGGCCGGATCCCCCTTGCCGTAAATTCTTTACCCAAGTCTTCAGCATCAATTTCCAA  
GTTAGAATCCAGCCCCGCTAGAACTGTCACCTTGTTATCATCAATTGTATCGCTGTCTTTTAA  
CATGTTAAAATCAGCTAAAACCTTTTGCCATTGAAGCTGATGCATTCTTAGCAGAAAACCTGA  
AGCTGTAGTCTATAAGGTCAGCAACTTTTACCTTGGGAGACGACATTTCACTTTAGTAGCG  
TGCTTGATTGTAAGTTGTACTTTGCAAGTTTTTAAATCTTAAATTGTTCAAGTAGATGAGCTAG  
AGGTAGTTGTTTTTAACTATCCCGC

>Seq85 [organism=Thymus ophiovirus] RNA2 genomic sequence

CGATAACAAGGAATACATATGCTTCTGGACTTAAAATCCTTCTTTTAGTGATAATCTAGTC  
AAGCTCCCACTTGATTTTCAGACATCAAGTGCCTTGTCAGAGACTGTGCATTTCTTACTGCAT  
GTTCAATAACTGAACAACCACCATGTTCTTCACATGCAGCATATGATTCATCTTTGAGCCAC  
ATTCTTCCTTCATTGCTTGCATCAAATCTCATTTTTTATTACATCATCTTTCATCAAAAAGACTT  
CATCCCCACTTGAGACCATTGCATCTACTATCTTGTCCCCTCTCAATTTTGAAAAAGACAATA  
TGTTACATCCAAACCTAAGATCAGAGAAAAAGCTTACTTCACTGAACAGGATCAGATCATCA  
CCAAGGCTAAAAACATGGCTCCTTCTTCAATGTCCATTTTGTGACACCGCCAAAACCTC  
AATATCGGTAGTAGGGTTAATTTTAGGCCTATAGTAAAAATGTTCTCCAGATCCAGTATCCA  
ACATAGTTGAGAGCAGAGGATGCTTATATTGTTTATAAACATTCTTCATGGCTTTTGTTTTGG

GGGTTGCCAGCTGCGAGTTCTCAGCCTTACTGTCAGAAATATTCATCTCATTTAGGTACCTTC  
CTAACATGTCAACACTCTTCCTTCCAGCTTCTATGAATGTCTCTTTAGAGTCAGTAGATGAAC  
TACTGAAGCTTTTCCTGCTCTCAGTTTCCATTATGACATTTTTCATTTTCTTCTTCCATCTCTT  
TTTCCTTCTCTCACTGATTTAAGTTGTTCTTCTCTTTTTCTCTTGACCTCATCCGCAACAATTC  
ACTCACATTGCTTAAAACACTTCTTTTGTAAAGGTCTTTTGGAGCCTTACCACCATCAATATA  
AATCAGAGTGCTTGGCTTGGGTCGTAACCTGAATGGAATCATTTCTTCATGGACAAAAAATG  
CCACAAATAGTGAACCATAAGCCCTTCCAACAACAGGGGCTACACTTGCACAGATTTCTATC  
GAAATTTCTGCAACATCCTTTTTTTCAACAAAATAGTTCATGGATAATTCGGCCAAAGCCATC  
TGGTCCAATCTGATGTCCCTCTTCTGAATCAATCCGTCATATCCAGCCTTTTCCTTCCCATGAT  
CTATCAAACAGACTTAAAGTTTCATTCTCAAAATTCTTCTTATCTGAACCAAGCAATGGAA  
GATAGAGCACTTGCACCTTCTCAAACCTGATAAAAGGGTATTTTTTCTTCTTCAAGTCTGGAA  
TGAACCTTTTGATTTTGTCCAAAGTTGTTAATTGCAATTTTTTTATTGTGCTCAGTTTCTTGAG  
ACTCACAGTGATGGGGGCAATTACAGACGTGATTATCCCTTTTGTATTTTCCAAAATCAG  
CAACAATGTCTTCTATTCTTCAGGCAAATCACCATCTTGAGACAATGACACAACCTGTTGTGT  
CCGATAGCTTCAGTATCTCATCCTTGACTTGTTTGGCTGACATTCTCAATGATGAGCTTGAAC  
TCTCTCTCATTGAACCTGAGTTGTTGAATTTTCTCAGTGAGCGGTTTCCGGATGTTGACATCT  
TAAAAACAAGTTACGATTGATCAC

>Seq86 [organism=Thymus ophiovirus] RNA3 genomic sequence

ACTGTTTCAAAGAATTTATTTAAACGAGTGAACGGAAAAATAATATCATCGAGACTAATCAA  
GAGCAGAGACAATTCAATGCTTTGAGTATGCAGAATAGACAGACTGTGAAGTGAAGTTTCATTG  
AAATCAGCATCTGGGTTCTCCAAGATATGCCATATCAAGGCACCTTCCTCTTCACTACCAAC  
AAAGTTTGTATCACGGAGAAACGATGAATTGTTGTCTTTCTTTGCCTTTCTGTTGATTTTCAGG  
TCTCGCAGATGGAGCAACAGACTCAATGATTGCTCTAGTTAACTTCAGAGTGAAGTTCTGAA  
TTACTGCTCTAGATTGAGAGAGAGGGGTGCATGTTTCAGTTGGGTTTATAATCAGTTGCAATT  
GTCCTCAGAGCTTTAACTATCTCTTTTCGCTTTTGTATTCTTCTGTTGTGCTCTTCATACTGTTT  
GTAAAGCTCAATTCCTGCTCCGGCTGGTATTGCTCTTTCTTCTGCTTCCTTCAGGGATGCTGT  
AAAGATAGAGTAACGAATAGCTCGATTTTCCTGCTATAGACATCTTACATCTGGTTGAAATTG  
CTATTGGAGTCCTGTCTAGGTCAATCTCAAGGAAAATCTTTGAAGGAAATTTTTCAGTATTTG  
TGCTCGAGAGAAGTTCAGCGATAGCCTTTAAGCTACCTATTTACCTTTAAATATCTTTTCCT  
TGATGAATTTAGGAATTGGCTTTGTGTCATCAGACTTTGAAGGAAGTGAACCTTGAATAAAC  
ACAAGGACAACCTGCCGCTAACAATGCTCTCTTTGCATTTATTATGTTGTCACTAACAGAAGA  
TGCAGTCAGTTTTGTGACTATCCTAGTAGTGAAAAGCCCAGCATTTCCTTCTCTTGTCCCTAT  
TGCTTCATAAAGAAGAGCATCTAGCACTTTAGTCCCTGCGGCAATTAAGTTGTTACATCCTT  
TTTGTCACTGTAAATGTTTATTTAATGTCCCCAGTCCGGTAAGCATCATCTTCCCATTTTATT  
CCATAGAGGAATCTTGTCAAGTGTTCTTGATTTCTTCAGCAGACACAGTATAAGACTGTTGT  
TTCATAAATTCTCTACTTCTTCAGTAGATAAAACCTTTCTGTGTTCAAACTGCATGTCCA  
GGGTTAGGCTTGTGATGCTCCTCATCAGTGATTCTTCTCCTTCTCCTCCTCCACAGCACTGG  
AAAACTTGAACCTTGTGGTGTCTCCTTTCTGAAATGTAATCCTCAACTGTTTTGCTTTT  
CGATGAAACCACATGGGAAACAACCAATTTTTTTATTGATCATTATAAGATCAGCATTGGGTT  
TTTCACTTTCATGTTTAGAAAGAGATATGAGAAATGCATTTTCTCTTCATTGTTGTCCAGAT

TGACACCAAATTCTTTAAAAAACTTGTCAATAGCTTTTATCTCTCTGGGGTTACTGCTTACTT  
CTCTCTTATCTGCGAGCTCTCTCAGCACGACCACAGGGACATCATTAGATTTAAGTGAAGTC  
ATCTTGTGTTATTTGTTTTAAAGTTCAAATTTGCAAATTTGTTACTCGTTTTAAATAAATCCCCC  
TCAACTGTTTTGCTTTTCG

>Seq87 [organism=Tulip mild mottle mosaic virus\_chilo] RNA3 partial sequence

CCACCTTCTCACTACGCGATCTTCATCATTTCTTACCGTAAGCAGTCTTCACGGCATCGACTG  
AAAGTTCAGAAAAGTCAGCTTCTGAATTCGTCAGAGTAGGAAAGACCGGATTACCTACAGC  
ATTTAGCTTTCCAAATATATTCTCGTCTCTCTTGAAGGCTTCTATCTTCTTGTCTTCGATTGCT  
TTTCTCATTTCTAGCCTTCCCTTGTAAGACAAAGATGTGACAATAGCAGAGGTCAGTTGCAG  
AGTGAAATTCTTTCTTGATGATCTTTCAGGGGATAGTGGATGCATCCTCACTTGTGCTTGGA  
ATCAGAAGCTAAGGAACACAAAACATCAACAATTTTCTTAGCTTTCTCCAATTTCTCCTTTTT  
CTGCATGTA CTAGCTCCTGCAGTTGCTGTATCGGATCGGGAACGGGAACCTTCATCCTTTTT  
AACTTTTGAGCTAATAGAGCATATCTTATTGCTTTGTTTCCAGCGATAGACATTTTACAACG  
CGATGAGACTTCAGTTGGAAGGTTCTCAAGCGCAATTTTCAAAAAGACCTGACTTGGAACA  
AAGAAGGGTCTGCAGATGACAAGAGTGCACATAGATCATTTGACTTGAGATCCTTCTCTCTG  
AAAATCGTCTCCCTTATGAATTTTGAAAGGGGTCTTTCTTCGTTTGTGTTTTGAAGGTAATCCT  
CCTTGATTATAAACAAGACAAAAAGCTGCTTTTATGGCTCGATTTCTGTTTCGATTTTGAG  
ACTAAATCCTTGCTATCAACAAATTCAGGTGACAATGCTTTCACATCAAAGATGAAATTGTG  
CTCGTTTCGAGTCCTTATACGTACTGTATAGAATGGCGTCCAAAATTTTGGTCCCTGCAGAGA  
GTAAACTGCTAACGCTGTACTCAACCCCTTGAAGTACTTAATTTTCGATTTCTTTTGGCTTAT  
ATGTCTCAGCTGTCCGTGGTAGATTTTTCACGTAATCTTCCAAAACTTTTTGGATTTTGTCTG  
ATCGAGCGTGAGACTTTTACCTTCGATCAGCTCTTTTACTTTGGCTGCACTAAAAGCAATCTT  
TTCACCGATTTCAACTTTTTTCTCTGCTTCCTTGCCCTTAGAGCTAGGTTCAACAGCCTTCTTG  
GAACTTCAAAAAGACAGGGAACCGTCCTCGAGGACAAAAACGGTAGCGTTTGGATCTGCGG  
ATGTGAACAGGGCCATCTTTGCAGGAACAGCCTTCTCATCCTTTGTCATGAGACCAAGAGAA  
ATAAGAATCTTTGTCTCATCTTCAGAAGTTACGTCCTTTTGCAAGATATTCTGGATCTCAG

>Seq88 [organism=Triticum associated ophiovirus] RNA1 partial sequence

TCCAGGTTGTGATCCCTAACAGCTCAAATAACACTTCCTTGCTTCGTCCAAATTTGACACCTT  
TCCAAGCACTTCTTATTAATTCATTGACATTGTCAAGGTGTAAATCACTTCCATTTATGTAAC  
TGTTGACTTTGGAGTAGACCAAATTTTTGATAATGTATTCTGTATCCACTTCTTCTAATTGTA  
GTTCTTCTGCGATCTGCAAAATTAACATCCAGCTCCACACAAGCTTCTTATTGGACATTCTAG  
AATGTAAGTTCAGTACATATTGCAATAAGTCATTGAATGGTCCTTTGTACCCAGTAATCACA  
ATATTTCTCGTCACTTGGTTACTGCCCACTTCTATCAAATCTTTCCCGGCAATGTAATCATCA  
TATATTTCATACATTGGTCTATCGACAGATTCTGCCCTGTTATTAATCGCATCGAGTCAGTT  
ATGCACTGAGATGGGTGATCATAGGAATAATGTAATAATTGTCTTCTTAAATCACGTTCACT  
CTTGATATACTGGTTGAGCATTGTTGGGATCTCAAATCTTTTCTGGACTGTTGCCTTATCAAC  
AATTTCAAGGATTGACTCTTTGCTGATCATTTCTTCACTTGGATCTCTGATGAATTGTGGATT  
GCTGAATTCTATATCTTTAGATAAACCATCTTGACATGTGCTGATTATTTCCGACTGAATAC  
TGAAC TAATGAAGCCTTTTTCAGTGCTTATTTCTCCAATTTTTGTACGCTTAGTTGGTTTGAAC  
CATAAGTAAATGAGGCCTATTGAATTAGAAGATGGAACCAGTGCATCACAAGTGAAC TTTT

CAACACAGTTAGGACCTCGTCTGGCATCTGATCAGCTACTGAGTTTAATCTTATGATGCATTC  
TTTTCCGTTTTCTAAAATGTTGCTAGCCGCTTGCCACACATTCTTCCCTGTTTTGTGGCTCACA  
TCGAAGAGAATTATGTCATGATTGTAATACTTTTCATACTCCATGCTTTGGAATGCATCAAAT  
GTTTTCTTTTTTGCTATCATTCTGGTGCACGCTCAAGCAAGTTGAATCCGTCATTCTTGATA  
ATGATGTGTGTTCTAATTGGTACTCTTGTAAGCTAAGTGGAATTCTCCTCTCCCCCGCACA  
TGTCAGCAATTTCGTTATCTAAGGAAGATAGTTGCAGTAGCTCACATACTCCGAGTGCAGAT  
GAATATGTTAGAGACCGTGTTGGTGATGAGAAGATTTTCGATGTCTGCGCTTAGTCTGCATAC  
AGTTTCAAGAAGCCGTATTGCTGCTCTAACACCAACTACATCTTGATAGACATTCCACATCAA  
ATGGGACTGTATCATAATTTACTTTCTTCATTGATTCACCCATCATTGGTTTTATAAAGCCGC  
AGTGTTGTGGGGTATAATAAGAATCAATTTTCCTTTGTTCAAAGCTCATTTTATTGTATTTGT  
GACAAAAGAAATCTATCGCGTCTTCTATGTCCTTATAACTAGCACCGAGGGCTGGGAAACCA  
TTTACTAATGTGTCTCCAATGGCCTGAGATCTGATGTATATGTGACCTTTTAGCTCTCTCATT  
GATTTAAGAACAGTCTTTCCTTTGTGCTTGCTAGCTTTCTCTTTTATGAGTAATTTAGGCTGC  
TGTCTTCGTTTTGGACAACCTTCGTAAACCAAAGAAGTTGCCAAGACGAATAGCTTCATCATA  
GCATCCCGATATTCCAGTGAATAACCATGCCTTTCAATTTCTTGAATCCAATTCTTTTGATCG  
CCTAGTCGGAATACTTCTTGGTATATGATGGATCTGATAATAGCCTGATTTGGAGTTTCTGTT  
CCAATGATGTCATAGCCCTTATAGAAGTCGTAGAAGTTATCCAAGAATTCAATGTGATTCAT  
GTCACCGATCTCATACAGTGTCTATAATATCCTTGATGAATGATGGAGCAATTCTATTTGGTGT  
CATCAACCTTTGATCTTCCATGTATGAGAATAGATGGCGAAATGCTCCTTCTTCTTCATTCT  
ATATGTGCTTTTTGTCTCAACATCTTCAATGAAATCTTCTGAATTACTTGGAATAGCGGCAAG  
GAATGATGAGTATTGTCTGTATATGCGCTTACCAGTTTCAAACAAGTTTTTGGGCACAAATG  
TTTGCATTTGCATCTTGCTAACTGAACTAAGTTCTTTAATTCAAAACCTCACATCTTGTAGTA  
GTGGTTCTAATTCTGGGATGAATGAATATCCATAGCATTCATGCTTATCTGCATTTAAGAGTG  
ATAACTGTATTCTCATGCAGACATTTAAGTACTGTAAATTTAGGTTGTTATCTTCTCCTCCAT  
ATTCTGACAATAGATGATCAAAGTTTGTGACTGTGTACAACCTTTGATTGTCTTGGGATGAG  
AGATCTCCGCTGAATGCTTTGAAACCACCACCATCGGCACGATGGAATATTCTACCACCTGA  
TGGCACTGCAATTATATCTCTTAAGTCATTGAGCCGAATATCAGTGAAGGTGCTAAGTGTTA  
AGTCACATGCATCCGTTAGCCCAGTTGCAGTTGTTTTATCTTCCATTCCACTTCTGAATTGCT  
CTGATCCCATCCACACTGTAAATCGACACACATCATAAGCAAGAAAAATGAGTTTGTGAGCA  
AACATTCCCTCAATCCCTATTGTTCTGTCATATTTTGGTCTTGCGCCACTGGAATACAGGGGT  
GGCCTAAAGTGTTACCATCTCTAGTTAAGACTTTTTTCAGTGAGTCTTGACAATTGAAATCTC  
ACACTAAACGGGTTCTCTACAATGCATCCAAGAATTGGGATCTCTTCAATCTCAATGAACTT  
GATCCCAAGTATTTGGCGTCGCATGTCTTGCACTTGGCAAGTGATAAGTGACCAAGCTCAG  
GGCGCATTAATGGCAGAATTGGTCGATGGTTGGTTTTCCATGCTTTTGAGTGAATGATGTTTA  
GTTGTCGGTTACTGAGTAGATGTGGAAGAGTCACAGAATTATCGATTTTTGACACCCATGAT  
CTGGCGTAACTGAAAATGCTACATTCATAATATTTTGATGTCCAGCGGTAGTGGAATGCNNN  
NNNNNNNNNNNNNAGTAGTTTTTGCTTGATTCCAATTCTTGTTGGTGATCCAATCATTTTTAT  
TGCTCTCAGCAGTTCTTCGTTTTTCACTTTATAAGGGAGAATTTTGATTAGTTCATCAGAGAG  
GAGTGTGCTAGTGTGGAAGTAACCTCCTGTTAGCGGAAATGGGCTCATTAAATATGACTCTA  
GGCTTGTCGAGGGTTGATATAAGCTATGGATTATGTAATGGTATTGTTTTGGGATTAAAGAG

TTCGCATAGTGTATCCGTTTCACATTGGAGACTGAGAAACCAGAAATCGCAGCATCTGGGAN  
NNNNNNNNNNNNNNNNNNNGTGCTCTTCCGATCTCATGAGTACTAAGGTCAGTCCAAGTACT  
AGTTCGTTATCCTTGTGAAAATGCATGAATGATGCATTTAAAGATTCTGCATCTGGCAACTTT  
TCCCATTTGTTTGGATTATACCCCATTGATATGATTTGGCCCAACTCACCAAGTTGAGTTCC  
TGTAAGTGAATCTTTACTGTGTTCTGATGTATGATGAATCTGGGATCTATCTCATTGTGATT  
GTAGGATTTTGTATCTAATGCTTTCAATGTGTAATGACAATAGTTGATAGTTCCTAATACAAG  
TCTGCAACAAGTGATCATCTGATCCTTCGCTAGCTGATGTGTAGCATGAATCAGCAGTAGTA  
ACGTCTGATAATTCTCCGCAGATTAGCCCATCAGTACTACTAGTCATTGACAGAATTCTTTTG  
GCACTAGTGTCTATTAATTTACCCCGCCAGTAATGGTTTTTTAACATTGTTGCCCGATTTTCT  
GATACTTGAGTCTGTGAGAGCTTCAATATTAGTCCCATTTTTAATGCTGATGATTGGCAATTC  
TCAACTATATTATCAAGTTCTTCTACTTGTGCGATTGGGAATCCTCATGGTTGCACATACATCA  
TCTGAGTAACTTGTTGCAATAGCTCTATATATCCCTTGATCAACAAGCATTGTGTTCAATCATT  
AGTTGTGATTGGATTCCCCATAGTGGACCAAAACCATCCTTCAATTGCGCCGATTGGAATGC  
TGATAAGTATACAAAATCAGACCATAAGGTCTCTGAGAATATCGGACATGAGTGAAACACC  
CAGGGCAATTTTAAAGAAATCATCATTATCAGAACCTTCTAGTCCGAACATGTCACCTATTTCT  
TCCATGAGAAATGATGTATTCTCTGGCCTTTGTGTGGTGTGTTGGCCTGAGTAGTCAAGAAA  
TAAAGCAATTCATGTGGATGATCTTGCATTTACACATTTTTGTCATCATGTTTAATCTAGA  
GTTTGAATCCATAGTCATCATTGTCCAGGTATTAATTTGGCTGCCCTTTTGACCATTTCCAT  
GGCTACTGATAACCTCAGCTTTAATGCAAAGCTTGCTATTCCGTAGAATCTTGGATCACTCTT  
CATTTCTTTCTCTTTTTCCGCCAGCCTAATCCACAGTTTTGTAGCCTTCATTTGCGGGGATGTCA  
TCTCTTCGGAATACATTGACGAATCGATCTGGGTATTCTCTATGAATGACTTGAAGTCCACC  
TCAATATCAATCTCTTGGCTTTCAATGAACACAACCAGTTCCTTGATAGAGTTATGACCATTC  
GGATCATAGTCATCAACAGTGCAGAGATCGGAAGAGNNNNNNNNNNNNNCTTAAACAAGCTT  
CTTTGTTAAATTCACATTTTTCCTAATTTCACTGTTGAGTAGTTGGTGGGGTTATATACTA  
TACTTTTATCATATTTCTGTTTGTGTTGCAAAGAGTTCTAAGTGAAACATTAGCTCGTCATTG  
CTTTGATGGGGGGTAATTTCTTATTTTTTGTATATATGATGTCACTACGTGCATTTTGAATCT  
CATCCTCAATTTTCTATTTGTAGTTTATCTATTGGGAGGTCCCTTTCTGTCCTTTGCGTGTAT  
CGAATCAATCCACCCTCGTGGCTAACAGCTGCAAAATGTGCATTTTTGTCATATACCAGTCAG  
CCAAATGCAGTTTTCTGCGCTAGTAATGTTTAAAAGTTGGATCGTTTGTTCACCCATGTCATT  
GTCTATTTGATACATTTCTAGTAGAGCATCGAGGTATGGCATGTGGGCACATAATCCCTTCAT  
GTCTGCTGCCATCAATGTATATGTCTCTAGACTAGCTAAAACTTCACTTTTTTGTATGATT  
CCAGTTTGCCTTTTTGATTGATAGCACAAAGTTCAATTAAGTTTCGTTGTTGAGCCCCACAATT  
ATCACGGATTATGTGAAGGTTGCACATGATTTCTGAATAACTAAA

>Seq89 [organism=Triticum associated ophiovirus] RNA3 partial sequence

CGATCTTTATACCTCTGGTTATTTTTCTTAACACGAGACTGTTGACCACTTGATCGCACTACT  
TGGTGTAATTCGTAATCCATTTACAGTGAGTTCCTCTCCACGTAATTCAGGAGATTGGAGA  
CCAGGGCAGGATAGGACTTGGCCAACCTCTTGATACAACATGGTATCCAACCTTAATGCACG  
CATATTTTTGTCACGGATGAATGCCAGTGCTGCAGTCAGTCCGTGTTGTCAAGGGAGCGGA  
ATGCCATGACTGACAACTTCTGGCTGAGTTTCGCAGCGTGTCCATTGGTGAGGGGGAAGTCT  
GGGTGAAACTTGCGCAACGTATCCCACTTGAGAGATAACACATAAGCTCGGATCTCACGAG



ATAGTGTAGCGACTGGAGTTTTGTTCTTGCCACCGTCGTGAGCCGCAGCAATCTGAAAGTAT  
CGAACAAATTTTCGTTCTGCTGGGCTCAGTTCGATTTCGGTTAGCTGTAACCTTGTCTAAATTG  
TTGAGGTCGTCCAATAGGAATGTGGTCATTGGGAATTTACTGAGAGGTGCACTGCTGAGAAT  
GCTGGCAAGCTGTGCCTCTGTCTTGACATTCAGGTTTCGCCATGGTGCGGTAACTATGTTTGC  
ACTTAGGGGGCTAGATGTAGCATCACGTTTTGGGGCAAAACCTCTCGTCAAGTAAAATTCAC  
AGAGTGCAAATATTGACTTGCCGGCCGTATTGCGGATGCTACCAGCTGTTCCACTATCTGTG  
CTAAATGGACCACTGATTTTGAAGATCCGTTCAAAGTTGGGATCTTGACCGTGAGTAAAGAA  
GATTAGTGCATCAATGACTCCAGTTCAGCAGCACAAACATTAGTCAGGAGTTCCTCTGCAT  
CCCAATCCATCATATCTTGGAACATGAAGATCTTGATTTGCGCGGCGAAGTAAGTGTCTTGC  
TTTGGAATTGCTCCAAGAAGCTTATGGATGCAGGCTTTC AACAGATCACCGTCAAGCACTAG  
GCCAGTCTTTCGGAGGTCTTCATAAGCCTGTACACCGGCTGCATCTCCAATCGGCACAACGG  
CTCCAGTATTCAACATCACTGGTGCGGCCTGAGTAACAGCTGGCGCAGAAGCAAGATTCTGC  
AGGGACAGGAAAGGGGAAGCCATGTTAATCGCTGAGAGATTGTCAGGAATTAGTCTTGAGA  
ATAATTGCTCACG

>Seq90 [organism=Viola ophiovirus] RNA1 genomic sequence

TAGGGTCTTCACTTTCAAACAATTCTAATTAGAATTAAGTATTGCCGAGTTTTTCAC  
CTCCGCTTGGAACACAACAATGATTATAGGTCACAGCTGCATTCCTGTTTAATTAATAATCC  
AAATTAATAATATTTAATATTCATCGTATCTGAATAGGTTAGGGTCTTCACTTTCAAACAATTC  
TAATTCTGCAAGTGTCTTCCAAAGTTTTTCTTCTCCACATTTTTAATTCATCATTTAGTT  
GTAAAAATTTACTCATAATATCTGTTATTCTATCTTCTTCTTTTTGTAAATTATTTCTTCTCT  
TCTTTAAACTATCAATAAATGATTGATTGAACAAATCATTTAATGGATTTGATTTAAATTCA  
TCCGAGTTCATATATTCTATAGCATCCTTATATTTTAATTCAAGATTTTCAATTCTTCTCTG  
ATCTGATTCTATCCTCTTTTGAAGCTACTTCACCCCTTAGTTTTAAATAAAATCGATAGTTT  
CCAATTTTCTGATTCTGTTTTATTACTTATCCTATAATCTTTGGCAAGTCTCATTACTCTATT  
TAATATGAGTTTAAATCCTTTATATTGTTTGTGTTGGTTCTTGTTTTTACTTTTAACAAACCG  
GATAAGTTGTTTGTGTGAACACCAGAAATAATTCGCATTTCCTAATTTTATTGATTTCTCTTC  
CATAATTCAGTAACTAATTTAGTAGTTGTAAAAAGATTTGTCACTAATTTCCCTGTGCTATTT  
TTCTTTATAGCTTCTATGCTTACTGAATCAATTAAGTCCTTGGAGCTTATCCCTCTTTCATCAT  
TCATCAATGTGTAAAGTAAGGACCATGCTGATTTATGTCTCATAGGTATGTTCAATTATGGAA  
ACCTCTTGCAAAAATTCAGCTAGTTCACTTTGTTTTGACTCCTTAAATCCATAGACTATATAA  
GGAGGGAAGGATGACAACCTTTTACAATGTACTTCAAATTCAGTGCTACCTAATTCTTTATA  
TTCCTTTATTATTTCTGAAAAATTCTTATGTCCTGATTCTCCCTTTGAAAGATATGTCAAGTTA  
TCATATAAAAGGTATTTATCTGGTTTTTCCAAGTCCCACACATAGTAAATTTTCTAAGTCA  
ACTTTATTATTAACACTTCTTTTTAAATCATCAGGGACAATTATTATTTTCGTCTTTCATTGGTG  
ATAACATCTCATTTAAATATGGTTATCAGTTATGAATTCTTCCGTATGGTCTACAATGTTTA  
ATCCAAATCTAGGCATAACTGGTTTGGACATTAATTCTAATGAATTTTAACTAATTGTCGCA  
ATAATAGTGAATTATTAACCCACCTTTTTCAATATTCTCTGAAAGAAATGGTCCATCTAAAC  
TAATCATATCATTTTCATTTCTTCTAGATAAAGATAAATTATACCAAGTGAATTATAGTCTG  
GCACTGCAATTTTGTATTACATTTTTTAACCAGTTCCCAGAAGCTTCTTGGTGCATTACCGA  
TTATGCTATTGATTCTTAGTATTACAACCTTATCATTGTTCAATAGATCAGTTATTGAATTTGT

TAATTTTGATTTATAGTCAGTTGCATGGGAGATATCTATTAAGAAAATGTTATGAAAATTTAT  
TGAATTATAATTTTCCTTATCGAAGCAATTCCAATTTGCTTTCTTAGTTACTAATCCAGGCAT  
TCTATTAATCATATTGAAACCATCAAGTCTAGAATATGATTTGTGGATTAAATTTGCTTCTTC  
CAATGCTAAGTGAAAGTCACCTCTTCCCCGCACACATCAGCAATATTATCATCCATGCTTA  
AAATCCCTTCTTCTATAAGGGTCCTTATTAGTCCTTTTCGCGGTTGGATATATATCTGATTTTGT  
TGGTGAGGAAATTACAGATACATCACAAGCTATTGATGTAGCATATTCATAAGACCTTATAG  
CTGATCTTAGTCCTTTTATGTCAGAAATATCTGATTCTTCAAATCAAGTATTTTATAATTAA  
CCTCTCCAAAGAATTTGTTTTCTTGTTTTTAATCTCTTTTGGAATTTTCATCTGTAAAAAACTC  
ATAAAATCTTGCTTGTTCAAATTCCTATGGTTTAATTCTTTGATCATATCTTTTGCACAGCAT  
TCTATTTCTACAATTTTATAAGACATTAAAGGAAAACCATAAATTAATGTTCTTTGTATTGAT  
TTGTCCTTAATATGAAAGTGATAATCTCCAGATTTTCATTTTAGATAATGCTCTTTTGAATTTT  
CAATTGTTTTGTCAGAATTTATTATGAGTTTAAAGTTATTAGCCCCTGTTGTTTCAACTGAAT  
ATACTAATCCACAAGCTATAATGAATAATCTTAATAAGTTGTTTCTGTACGTGAATGAAAAA  
CCAGTTTTAACCATTTCTGCCATCCAATTTTCCCAATTTTCATCTTTTTTGAAGATTTCTTCAT  
ACAACAATCCTCTTATTATAGCTCCATAATTACTTTCCTTCCCAATGACGTTAAGAGAAGAGT  
AATAATTATAAAATTGATTAAAGAAATCATCCTTATCATAAAATGTTCTTTCTGAATTATCTA  
TGATTTGAAATAGTAATTCATCGGCTATTATTTCTGGAGTTGTTATAAGCTGGTCCATCATAT  
ATTTATAAACTATTTTAAACTTGTCTCTGCTTTGATATCACTTAGTTTAAATCCTTCAGATAT  
AGCAACAAATTGATCAGGGTCTTCGTCATCACAACCAATAAACTCTGAATATGTTTTATAGA  
TTTTACCTGATTCCATAAAATATTTTTTAGATAATAAATTATTGGGTGTTATTTCTTCTCTAA  
TTTTTGATTCCAGATAAAATTAAGTTACATCTTTTATGTGATTAACTATTGTATCAGAGAG  
AGTATAACTAGCTAAGGATTTTCTTGAAGTGTTCAATAAGCTTAGGATTATCCTCGTTGAGGT  
AATTAAATACTGTATATTTAAATTATTATCTTCTCCACCTAAGAGATACTGCATTGTACTAAT  
TCCTAGTATTTTCATATTTTGAAGATACAAGATGGCTACTTAAATCACCTGTCTTAGGATTAAA  
ATTACTTGAGTTTGCTCTATGGAAAAATCTTCCACCAATAGGAGGAGATATAAATTTTTCTA  
AGTCTTCATATTTTGAATTAGAAAAATGTTGATAATGTAAAATTACAAACCTTATTAACAG  
AATTCTTCTCTTATTGTTATTTTCAGAAAAATTTTTAATTTCCATTATTATCCATTTTGTAATC  
TTGTTATTTCTAATCCTTGAAATATTAATTTATGTTTGAATAATCCTGATATTCACCTATCTGA  
ATCATATTTTGGCAAATTTAAAGACGTTCTAACAGGTGGAAGTCCCTTAACTCCTCTTTCTGT  
AAGTATTTTATTTCTCTAGTAGTTATTTTGAACATTTTATTCCAGGTAGTAGTTTCAATGTTT  
CCCATAAATTGGTACTTCTTCTATGTTTGAAGAAATTCATAGATAATTTTTACCTATTTCTCTTC  
TTTCATCCATAAGACCATCAAAATTAAGATTCTTTCTCTTTGTTTTTTAAATTAAGTTT  
GTTATTCTTTATAATTATTTTATGGTTAGCAGTCCAAGCTTTATTCCATAATTTGATGAATCTG  
TACCCCATCATACATATAAAGGTGGTTGAATTATCTATTTTCTTTATAAATGTGTTAATATAC  
CCATAAACTGATTCTTCATAATATTTAGATACTATTCTCGAAGAATAAACTCTAAAAATGG  
TTCCATTATGTTTTTCTTGAATTTATTTTCTTTTTGCTATCAACTAAATTAAGATTTGTTTCT  
ATTTCTATATTTTAAATCTTTTTTGAAGTACCCTTTTTAGTGAATCAGAAAGGAGTGTTGAG  
GTATCATACCTTCTCCTGTCTATGGGAAATGGAGTACTTAGATAGCTTAATCTTTCCGTAGAT  
AAATTAATTAATTTAGTTAATGAATATTGATCATTTTCATCTAATAACATTCTTAAGTAAGAT  
AATCTTTTAACTTGATTGAGAATATCCTGAAATTAAGGCATCTGGAATTGGGGTTAATGA

ATATCCATAACATGTATAAGGGGCATAAAAAGAAATAAAGAATGTGGCTTAAAAAACTTTTA  
TTTTTCAGGTTGAATGTTATAATTGTTGTTTCGGGATGTAAATCAGGTGAATTTGGAACATTC  
TCTCTCTTTAATATTTCTTTGGCATTAAACCTTGAAAATTTCTTAACGTTATCATCTTTGTGTT  
TTCTAAAAGTAATAGATCTATTATCTTCTGAATAATCTGTCTGTGAAATTAAATGAAGCAAA  
TCTTTAATAATAACTTTTTATTATCCTAAAAATTTCTAATTACTGATTGCAAAAGATTTGAAGAT  
GCTTTTTCTGAAGAAGACGTAAAACCAGAATCAGCTAATTTACATAACTCTAAATCGTCACC  
AAATAGATAGGATGAATTTGTTGATATGCCAGTCATCTTTTTTAGATTGTGTTCTATAGGCAT  
GTCGTTATAATAATGATTTTTTAAGCATACTACTTCTAGATTTACTTATTTGAGTTTGACTCAG  
TTTTACTATTAAACCCATTTTTAAACCAGATGTTTGTACCCTTTCAATCATAGCATTAAAGAAC  
TTTGGTTGATACATTTTTATATTTGAAAACAGCAAATGCATCATCTGAATAAGAAGTAGCTA  
TATATTCACCTTACCTTAAAATTCATGAACATGGATTCTAACATCAATTGTGACTGTATTCCCC  
ATAATGGGCCTAACCAACCTTCTATTGCTCCCTTTTGTCCCTTTGAATAATAGACATAATCTG  
AATACATTGACTCTCCAATATATCAAGATTTTCAAAAACATTTAATATTGAACAAAACCTTTT  
TCAACTCTTCAGATTCTTGCTCGAATCCATATAAAGCCCCTATTTCTTCCATTATAAATAAAT  
TATTTTCTCTTTTTTGAGATGTATTATGACCAGAATAATCTAAAAATAAAGAATAACTTCCTT  
CATCTGTTAATAGACTAGTCATGTCATACATCTTAGTTCTTCTATCGTCTTCGTTCCATAGTCAT  
CATTTGTCCAGGAATAAGCTTCATTGCTCTTTTTACCATTTCATAATTGAAGATATCCATAA  
TTTTAAATGAAAAGACGCAACACCATAAAATCTTCCAGCACTTTTTTGTCTTTTTCTTTTTCT  
ATTATCCTGGTTAATGTATGTAATGTTTCTATTGTAAATTCATTTCCTTTTTAAACACTTTATTA  
TTCTTTCCCTTTCAACTTCTTCAAAATTGAATAAATCATTAGGGTCACTTATTTTCTCATGCTC  
TATATAATATAAAAGTTCCTTAATTGAATTCATCCCCTTTGATTATAATTGTCAGTAGAACA  
AGACTTATCAATTAGTCTGCTTTGAAGGTTGATTTCTTCTCCAACCTCCAAAGTTTTGCCAAA  
AAGTATATCCTTGTAATTATTTGGATTATTTACAAACCTTTCATTATAATTTCCATCTGCAAC  
CATTATTTCAAGTTCCTTGCTTAAGTCAGCATTTATAAACTTAAATTTTGGCATTTTTTCTCATT  
TTCTTAATACAGCCAAGTACCAATTCATTCTTAATATATTTCTCAATTCTGTAATGTAGGAT  
GCTGAAACTGGCAAGTCTCTATTTGTTCTCCGAGTATACTTTGAAATTCCCAAATCATAATCA  
ACTTCAGCATATGTTAAAGTCTTATTTATGCATGAATACTTTATCATTGTTTCAGGGTCAGAA  
TTGTAACAAATAGAAAAAATTTCTTCAGCTTTATCTGGGTAAATCTTTATTGTCTCAATTAAA  
TTGTCTAAAACAGGCATTTGAGCACAAACATTTGTGTAATCACTCATCTAAACAGTTAGT  
TTCATACAGGGAAGCTAGAGCAGTTCTTTCAATAGAGTCTTTTATATCTAATAGTGATTCTAT  
ATATTCACAAATCTTTTTTCATTAAAAGGTATATTATCCTTAATAATTGAAAGTGTTAAGGA  
ATGATCAGCTAGAGTCATTAAATAATCAACCATAGAACCTGGACCTACATTTAATTTATTTT  
GAAAATAGACAAATGATAGTGTCTCGATTTGTAAATATAGATTTCTTCTGGTTCAGATTCTA  
TCTCTATTTTTTGCCAAAACCTTGTCAAAAGGAAAAACCTTAAACATTTATCCTTTTTCTTCAT  
GAAACATCATGCTTCCAATGCTTTTTACTGAGTGTTTTCTTTCATTAACGGATGTTTTAGCTTT  
AAAATTGATAGTCTCAACCAAATCCAAAACCCATGATTTTCTTAATGTCTCCTCAGATAATTC  
ATCTGATACAACATTTGGAATTTTTCTTCCCTGATGTATAGAATTTTGAAGTGATGACAT  
TTCATGTTCCATGAGAGAATGAGATAATTTCCAAAAGACAGAAGATCTATTACTGGGATTAC  
TTTTTGATAATAGATATTTATAAAAATTTATCAATCTGTCTGATTGGAAGTGACCTTATTAA  
TGACAAATCCCTTTATGTTTTCTCGTAAAAGCATCAAGTCAATCCTTGCTTTATTATTCCATT

>Seq91 [organism=Viola ophiovirus] RNA2 genomic sequence

CCCGCCCTCTCAAACAAGGTCGTGAGAACCACGTTATTGCGATGCAACATTGCCACAGTGTT  
ACAAAACAAAGAGACACTAGTCACACCCAATGATTATCGGTACAGGGCATTAGGCTAGTC  
TCTCCCGTGGACAATCAATACTGATAGTCAAATGTTATTTTATTTAAAACGATAGTCGGA  
AGCGATTTCAATTAAGTATAGATAATTTTTCTTCACTAAGAATTGTCATGAAGACCAGATCAT  
CTCCGGAATAGTACATGGTCCTTTCATCTGACAATTTCAATTGTGTCAATGATTCTATGGCTCT  
GCAAAGGCCAAGTGATAAGATGTTGATTTCAATTTCAATCAGTCACAAATGCTTCTGGGAGG  
CAAATGTTATGATCATTCAAATCAACAGTTACATTTTGCAATATAGTGCCCCTTATAACATTG  
CCATTTGCAGTGTGGATGATCTTATCTTTCTTTTCAGCACTTCTGGCTATAACATGCAATGCA  
GATCCAGAATCAATTATCCAAGAATCCCTTGACAAAGCTTCTAAATTAATCCAATAGTATA  
TAAAGGATTTTCTTCAGAGTTCTCATTTTTCTCATTTTCAGATTTAGAGCTTTCTCCCATTTCA  
AGAATAACCTTCCCTTCTCGATTATCCCTTTCTTCCTTAACCTTTTCTTCAAGTTTAGACAATT  
TTTTGTCCTTTATTGCCTTTAGTTCACCTGTCACTGTCCTGATTATACTCTTTGAGTTTAAAAG  
GCTTGGTCTTGGGCAATTGTTGAGTAATAAACAAATTGGCTTGTTTGTCTCTACTTTAAGTCC  
GATAGAATTTGCATCAATATGTGTCATGATACAAATTGAAGCATATGCCCTGTTGCAGACAG  
GAACCTCTGTTGATTTGAACCTTAACACAATACATTGAGCATCTGAAGACAGTATTGTGTAA  
CTCATACTCAAAGACTAATAGCCATTTGAGTAGCAGGATGAATGACTTCTTGGATAACCCT  
ATTTGTAGAAGTATCAAATAATTGAATTGTGATTTGAGGATTTAATCCCTCTACTGCTTCAA  
GTGTGGAATATATAAGATGTCAACCTTTCATACCTTAAGTATTTTGGGGTTTTCTTAGTGAA  
GGAAATTATACTTTTAGCTGATCTTTCATCAAATGAAGCTTTATTTTCTTAGTTTCATTTTC  
TCTTTAAGCTTGTGGCAATAGTGTAACCTTGATGTCCAGATTTTATTCCGAACAAACCCTTCA  
AAGTCACCAGCAAGATCAATAATTCTATCATCAGACTGATCAGGAATTTGGACAACAGTATT  
AAAGCCCTTCTCAATCTCTTGAATTATTGGAGCATCAACATTAATTCTTCCTGTAGGTCTTGT

GCTGTTTGTGGAATAATTAGTTCCAATTCATCTTTCCTGTTTAGAGAAATTGACCTTGTGAA  
CTTTTTTACAGATTCTTTTTTCCTAAGATCAGACATGCTTCTTCTTGGAGCTTCCATTGAGTGA  
GATTCGAATTGATTTCGATGCTTTAATTTCCAAAAGAGCTTGTTGTTTAAAAACAATATCCC

>Seq92 [organism=Viola ophiovirus] RNA3 genomic sequence

TTTTATTTAAACCGAAATCACAAAAGACTGATTTGAATTAATCCTTATCAAACACTGCCTTAA  
CAGAATCTACAGTCATTCCCATAAAGTCAGCATCATCATATCCAAAACAGGCCAACTTGTC  
TTTCCTGCAGCATCATCTGTTCCCATGAGGTCAGCATCCTTTGTGTAAGTGTACATTTTCTTCT  
CCCTGAAGTAATTTATCATATCTAGTTTTCCCTTGTTGGTTAGGGTGTACAGTATAGCACAGG  
TGCATTTCTAGAAAATCCCTTGGGTGCTGATCTTCTTGGATTCATTGGGTGGAGCTTCAGGC  
AGGCCTTCCAGTTGTTACATATGAAGCAAGTGTAGCAACAATATCATTTGCTTTTACCAA  
GCATTGTTTCAGGTCAATTGCTGCTTAGATACAGCTCTATCACCAAAATTTGAATAGGAAC  
CTTTTCAAATTTTGATGCATAAACTGCATAGCGCAATACTCTAGTTCCAGCAATTGATATTTT  
GATTCTTGAGAATGCAGTACCAGGAAGACTTTCAAGATTCACCTTAAGTAGAAGATGTCCTG  
GGAACCTTCTGGGACTAGTACTAGATAGCCTAGTAGCAATTTGCCCTTCAGTGCTCACTTTCC  
CATTAAACAAATTCCTTATGAATTCGGGAAGTCTCTCTTTTCAGCACCTTTTATAGTAGGAA  
CAATCATGTTACCCCTTATCAGAACCAATATAACCAAGGAAAGAAAGCATTCTGACCTATT  
TCAATTCTCTTTTTTACCTTTTCAAGAGTAAGCTTTGAAATATCAGCAGGAAGTCTTTGAAA  
ATACCAGCAGAATTGGGTTCAGAAGAGAGTGCAACATATAAAATAGCATCAAGCACTTTTG  
TTCCAGCTGCAATCAATGAAGGAACATCTTCTTTTCCTCATGGATAAAAACACTACAATGTCC  
TTTCTCCATAGGATTCCTTGGCTGGCAGTGATTTTATGTAATTGTCCAGAGCAGCAATTACTT  
TATCTTCATCAATATCAAATTGAGCACCAGCAACAGCAGCATCAAAATTATTAGCATCAACA  
GGTGTA AAAATCTTTTGATTTTACCTTCTTCAACTTCTTCATCACTTTCTATTTTCAGTTTCAT  
CACCTTCTTCTTCTTGCCTCTCATCATTATCAGAATCATTGGTTCACTAGGAACAACCCCTTC  
CAAATTTTCAACAGCTGAAGCAGAAGTAGCTCCCTTATAGGATTTCCAGCTACTGTAGACT  
TTGGAGAACCAACAACAACATCTCCATTATCCAGAAGATCAAGTCTGGAAGTACTTGGC  
TCAAATTTCTCTCCTTGAGAAATATACTTGTCCAAGGTTTTAGCAATCAACCTGTTATTGTTT  
CCAATAAGACCATATGATCTTAACTCTTTTAAACCTTCAGGAGGTAAGACATTTTCCCTTAAC  
TTCTTTAGTGAATTCTCAAGAGCACTAAAATAGATAGAGGACTTAATTGTCGGAGTTTGTTT  
AGGAGGAACCATATTAAGGAAATTCGGAATTTTAGCTTTTAAACTTGGAATAAGAAGCTT  
TTTGTTTTTT

>Seq93 [organism=Viola ophiovirus] RNA2 genomic sequence

CGCCACTTTCTCATGCTGCCTGATCGCAATGATCTCGAGTGAAGTGTTATCCTTAAATCATTT  
GATGCTCCGCAATTGAATAACACCAAAATGATTTAAAGAAAATCACTTCAGGGGCAGCAGG  
CTAGTCCAAGTTTCTTTAAACGAACCCGTAACAAATGAAGTGTGATCAAGAGTTAGTGTG  
AGGTTTGATCCAAGTACCATTGAGTCTTGAATCATAAACCACATTCTTCCTTCTTCAGTATT  
ATCAATCCTGAATACTGTTTCATTCTTTTTACCAAATATATAAAATCCCCAGTATCATCCAT  
CCTAGTTATTAAGCCTTGTTTTTAAAGCTTACTATAGGAAATCCTATTTGGATCAACATTATC  
CCCTACAAACACATCTTCTAATTTAACAACCTTTCCTCCAATTATAGTTGTTAATTCTTTAAC  
CTCAGAATAAGATTTCCCGTCTTCAATTATTTTCTTTATGACCTCTCAGGTGGATATAATG  
CTTGGAAGAAACAGTATCAAGTATGAATCCTTTTCACTTTTATGATCACTTAAAGCCCATCT

TATGACTGATGAGTCATCACTGCCAACTGATTTCACATGTTTCGTACTCTTCAAATTCGCCTCT  
ATCCTCTGTAATCTCACTTGAAATAGATATTGCACTACTAGTGGCTTTATCCTCAAGGAACAT  
GTTGTTTTGAAGTGATAATAACCTTTCTCTTCAAGGTTCATTTTATTTTTCATTTTTTTGTCAT  
TTTCTAATGACAATGCTTCCAACCTTTCCCCTATTTGTTTGAATATGGAACCCAATTTTACAT  
CTTTGGGTTGGTCTGATGGATCAATATACATGATTTTTGAATTTTCATGTTTATAGCTTCCTGC  
ACAATGAGATGAGTGAACAAAGAAAGCTATCATAACTGAAGCGAATGAACCAGATTTGGTT  
GGTTCATTTTCTACTTTCATTAATAATTTTATTTTCTTTATATCTTTTCTAGGAACAAAGAAGG  
ACATATTCATCTCTAAGAGAGACATCTCATTTATTGATGCACTTAGCTCAGCAATTGTTTGGT  
TTTCTAAATCTCCATTCATCCTTTCATCAACCAGTATAAAATTGATTTTGTATCTTTATTCTT  
CCTGCCATCGAATAAAGGAAAATAAACCATTTGAATTTTGCTAAACCTCATGTAAGGTTTAT  
CTTCTCTATATACTGCCTTCTTTATTCTCTCCAAATGTTTGAGAGAGAATTTACTGTTAAAG  
ATGCTTCACCTGTTTTACCTTTCAAATTAATTTCTATTGGAGAGAATGCAGAATCAATCCGAT  
CTTGTTGTTATTTTGGCAAATTCACCAGCCATACACTGAATTTTCAGGAGATAAATCTTCATCGG  
ATGACGAACCTACAATTATGATAGCTTCATCTTTTGCATCGTTAGTTCTTGTCTTTGATATAG  
ATATCCTTGGATGCTGAGTCAGGGAAGTGCTTGACGTTGAATTCATACGTCTTAGAGAGCGG  
TTATTTGCTGAAACTGAAACCATTTTCTTAATCAACAATAATACCACGCAATGATCTTAC

>Seq94 [organism=Viola ophiovirus] RNA3 genomic sequence

AACCGTTTTTGGCGTGAATGGAATTTATTAAAACGATGACATGAGGAGCGGAATTAATTAT  
GCAAGTTCTGGGGGAATCGTGAAATCTTTCCCATACATGTTCTTCAGTGTCTCAACAGTGATT  
GAAGAAAAATCGCCTTCAGGCGTATTCAGCTCAGGGTAAACCCTCCTCCCTGGCTCTCCAGG  
TTTTCCAACCAAAGTTTCATCTTGTAAGAAAGCAGTATTTTGTCTGCTTTAGATGGTTGTA  
AAGATCAACTCTTCCCTTATCAGTAAGAGAATAGATGATCGCACAAAGTATTTTTCTTGTGAG  
GCCAGGTGTTGTTGGCCTTTCAGGGCTCATGGGATGCATTTTTTTTCATGGCTTCCAAATCAGT  
TTGAACAGCCAACAGATACTCAAGAATACAAAAGCTTGTTTCACCTTCTCCTCTCAGCAT  
TGTTTCTCAAATCTCTGCTTCAGTACCTCCAGGAATAAAAGCTGGAATTCCTCTTCTTTCAA  
ATCGTGAAGCACTTATTGCATACTTCACGATTTTGTGTTCCAGCAACAGACAACCTGACCTTG  
ATGCATCATTCACGGTAGTATATTCAGGTTGATTTCAAAGAAGATCTTTTGGCAAAACTTC  
CTTGTTGAAGTACATGATAAGAGCTCTGGAAGATCTTGCATCTTAGTAACATTCAGCTCGAT  
TAGATGTTTCAAAGATAAGCAGGAATTGGCCTTGATCAGTTGAATCAATGCTAGGAAGGA  
AGCCTTGAATCCATACCATAATAGTACAAGCTCTTATCAATCCTCTTCCTGTCTTATGTAA  
AAGACATATCTTCTCAGCATATGACTCAATTTGTGAATGTCAAACATTCCGTTTGACTTTT  
CATCAGTCGCTAGAGAAACAAATAGTAGTGCATCCAACGGTTTTGTTCTGACCTAACAGC  
TCACAGAGAGAAAATTCAGAATCTAAATCCCCAAACCTGAAAATTTAACCTCATTAGCTGA  
ATAGCCTTGACCATCAGCAGGTAAATTGTTGTAGAACTTTTCAAGTTCTGCTTTTACTCTGCT  
AGCATCAACTTGAAAATTCTGACCAGATAAATTCGTCATCAATTCAGCACCAGACTTCATCA  
CTTTAGATCCCTCACCTCTCTCATTGTTTTTCTTTGTTTCTTGGCCTCTTTTTCGTGGTTCAGGA  
GGTGGTTTATTAGTTTCTTCTTGAATAGGACACTGTTCAAGACTTCCGGCCTCATCAACAGTA  
AGTAGCCAATCTTTATCGCTGTTGGCCATTTCTTTGAGTACAACCAGATTGCTGGGATTAAGG  
GCCCCGATTATCATAGCAGATTTTGAATTCCTTTGAGAAGGGACCACTCAGCATCGTCTAGGTT

CGCCTGGTCCTTTTCATACTTTTCATGGAGGGACTTTAATTCGCTAGTCCTGATTTTAGACAT  
ACTTGAATCACCTGAATGATCAATAACTTAATGAGCAATAGAAAT

>Seq95 [organism=Xerochrysum ophiiovirus\_brac] RNA1 genomic sequence

GTTTATACATAATCCTTCTTCCAGATCGCAATGATCAGCAGTGTTACAACCTAACTCTATTGAA  
CTATACTACAATACATAATAAATTTACAAATAGATTACCATTCAAACCTCATCCTCATAATCA  
CATCCTTCATCTTCTAGGAGTTTTAAGTTTTCTCATATGACCTATTTCTATTAGCTTCAATTT  
CTTCTTGAGTGTTGTCTGTAAATGTAGGAATTGTATCAGGTTCAATAATTTCTTCAGACACAG  
TATACATTTTTTTCAGTTTCCTTTTGGACATTGAACTAACATAGAGAAAAAATCTGGTATTT  
CATTTCTTCATCATCGAATCTTTGTTATTTTCCAACTTTCAACAATTTTCATTAATTCTGT  
AGAGCTCAATTCAGGTTTCATCACATGCTGGAGTATCATCCATATCGGCCCATTTTTTCATTTTC  
AGTTGGATTTTTCTTATACCTTGGGAAGAAGATTAAATTTTTCTTTTCAGTAATCGTATCCTATT  
GATTAACAATTTATAATCCATGATTTTATTCCTGGTTGTTTTCCCTTTGTTTTTCATTAATTCA  
TTTAAACTCCCTCTCCTCATTCCCTGTTAAAAGTATTAAATTTTCCATTGTTTTTCCAGTTTTAT  
AAGAGACACAAGCTATTTTTGCAATTTTATGTGTTGCATCAATGGCTTTTATCTCTTCTTTCTT  
CAATTCTGTAAATTTATAATGTCTATTAATGAATTCAGAGAGACCTTTTTATCTGATTCCTTT  
ACAATCTTAGTAAAAATTTCCCATATAAATTTGGCCTTTGCATAATTCAAACCATTAGTATCT  
ATTTCTAGGTGAATTTCTTCCAATTCTGATTTAGTTAAATTATCAAAATTCTTAATTGCTTTTA  
CAAAAGGAGTTGAAAGAATTTTATTATTAACCTCTTACAAACACATCATCAGAATATAAATCA  
TTATAAGTTTCAGTGAATAGACAATTATCATTTGATATGAATCTAGCTTCTCTGAATTTCTACT  
TTTTTACATAATGATGAATTATTTTCTATAAATTCTCCACTAAGAAATACCATTGAGTATTTT  
TCTACTTCTTCTTTGGTTGAGAATTGTGAATGAAAAGATAGTGGTACATGATTTACATCACTA  
TCAGGATCTAATATCATTTACACAAGAAATCATCTGATACTGTCTCCATGGTATGATCTAGT  
ACATTTTCTGGTTCTCTTGGAAATGGTTTTAGACCTACCATACATTTAATATTGTTAGTTAAT  
CTTTCTAAAATTACAGAATCAGTAAATGTTTTTACTTTTAATGATCTTTCTAAAAGTTTCACCT  
GTTAAAGTCTTTTTTGGTTCTATAGTTAGGTAAATTACTCCAGGTGAAGACAATGTTGGAATC  
CTTAAATTTAGTATAGCATTATTATCCAAAAAGTTTCTAAACTCTTGTGATTCAAATATTTTCG  
CATGTTGTATTAAATCTCATTATTATTTTTTTATCTTGTTTAATAACTAATTCTATTAATGAGA  
TTAGTTTTTCTTTTGTCCAGTTAAGTGTGAGATATCTAACAAAAATATATCATTTTCTAAAT  
ATTTTACATATTCGAACTCATCAAGCGCATTCCAGGAAGCTTTCTTTTTTTCCATCCCTGTTAT  
TCTATTTATAGTATTATAGCCATCTAATCTTGATACTGAATGATGATTAATATCCTTCTCAAT  
CATAGCCAGGTGAAAATCACCTCTTCTCCAAAAAGGTCAATCACTTTATCACCTAATTCTA  
GATTTACAAATTTTTTCATTGCACAGTAGGCTCATTAATCCCCTAGCCGATGGATAGATATCA  
GATTTGGTTGGAGAAGATATATGTTTTGGTAAACAGTACATGGCAGCCATCATTTTCATAACC  
CTTGATAGCCGCTTTTCATTGCTTTTGTATTTTCAAGGTCTTTTGGCTGTACAATGTGTGAATCA  
AAGTCAATGAATCCATATTCTACATTATTGTCTTTTCATTATTTCTCAGACAATTGTTCTTTAT  
AGTATTCAGTGATCCTTTCTTGTTTGAATTTTCATTCCATGTAATGAGTCACATAATTCATCAC  
ATGCTGATTCAAGCTCATCGAATGAATAAGATAACACAGGCATTGCATTTATTAACAACTA  
CATATCTTCTGTCTTTTGTCCAAAAATGATGTTCCCTTTCCTGATATTATTCAATGCATTTCT  
TTGAATTTATTTTTGTGAGTCGTCTATTTACTCGTATTATATTCTCTACTTCTGAAACGTCTTC  
AACTTTAAAAATTAACCCACATGATATTACAAATAACTTTAAAAGTGAAATTCTGTAACATAA

CTGAGAAACCACTTAATGCTAATTCTTTTACCCAAGATTTTGAGTCATGTTCCCTATGAAACA  
ATTCATGATTTATCAAAGACCTAGTTATTGCTTTCAATGGTGTCTCATTTTCTATTATATTCAA  
GTCTTTATAATGATTATAAAAATTCTTCAAAGAAATATTCTTTTGAAGCAAAATCACTTAAATT  
GGGTATGATTTTTTTGTAAAGTCGGTAAAGGAATTGTTTCTGGAGAAATTATCAATTGATCTTC  
CATATAATTATACAGGTTAATAAATGAAGATTCATTTTTGATTATTTTCGTCTGGTATGACCGC  
ACTTTCTGATATGAATTTTCCAGCCAAACATTCATCTTTAGCAATAAAAATTCGAATATGACTT  
ATAAATAAATGCTTTTTCTTTTTACATTTTCGAATGGTATTAGAGTCATTGCCTTTTTTGACATG  
CCAATGTGTAAATGTCTTATTCCATGAATATTAAATGTGACATCTTTGATTTCTTCTAATATA  
TCAGATCTAATACTCAATGTTCTGAGTTCTCTTCTAGCAGGTTGTAATAGTCCCATACAAACC  
TTGACTATGGTGATAAGGTATTGTAAATTCAAGTTATTATCTTCTCCTCCGGTAGAGAATATT  
AGTCCAGTTATACCTGACACGTCATATTGTCCACTAATCCTATTTGAACTTAGGTCTCCTGTC  
CTTGGATTGAACCCTCCTGCGGAAGCCCGATGGAAATATCTTCCTCCTCTTGGACAAACTAC  
ATAATCAACCATATCTTTGAATTTTACAGTTGAAAATGTTGATAATGTTAGGTCACAAACAC  
TTACAAGGGCTTCCTTTTTCTTCATTTGTCACTTCACTGAATCTTTCTAATTCCATTATTATCCA  
CTTGGTATATCGAGTGAGCTCATATGCACTGAAAATTAATCTGGATTGGAACAAGCCTTGAA  
CCCCTATATCCCTATCAAATTTAGCCAAGTTAATGTGTGATTTCAATTGGTGGGTGTTTCTTAG  
GTCCTGAACTAGTTAGCACAGTATCACCTTTGAATATTGGCAAAATATTGTGCGATAAAACT  
CTGTGCTCTAAGGCTCCCAGTAAAGGGATTCTTCTATGTTAATGAAATTTAACTTTACAGGA  
ATTCTTTCTTCTAATTTTATATTTCATTGTTTTTTCTTTATTATTCCTTTCATCTACAATAGACCA  
ATAAGAGACTAAATGCAAGCCAGATCTAACCATTTCTATCTTTCTATTCTTTTTCCAGACTTT  
ATGCCATAATTTTCCCATCTCTTCCTTACTAATAATTGCATAAAAAGTGGATGAGTTTTCTAC  
TTTGCTACAAATAGTTTCAACATAGCTGAAAATTGATTCTTCATAATATTGCCAGCTATTCT  
AGCAGAAAAACAATCCTTGAATGCAAACACTAATTTGTTTAGGAATTCTATTTTATTATTCTC  
TTTTTTCATTTCAAATATTTTCTTTAGATTTTTATTTACAGTGTGATTTTCTAATATTCTTTCAA  
CTTTATCAGCCAAAACGTGCCTGTATCAAATCTTCCTCCTGTAAAGGGTACTGATTTGTGA  
CATAATGTTCTACTTTTCGTATTAAAATTTATCAACTCACCTATGAAAGTCTTTCCTTGATATG  
ATAATAAACTCTGAACATAAATGATCCTTTTTTACGTTTGATAATGAATACCCAGATATATGT  
GCATCAGGTATTGGGGTCATTGCGTAACCATAACATTGTATAAGGTAAGTACATAAAAAGATAG  
TATAATTGACTTTACTTCATCTATTTCTCTATTAAAAACAAAAAGTTAGCTATATTTTCATC  
TCTTTTGTCCACTAGATCATTTATTTCAATTTGTTTCAAGCTTTTCTTTTAATAATTCTTTTTGAT  
GTGTAACACTGAAGCTTTTTAGTGACCTATACCTGTTATCTACATTTAAATAAGGTACTTGTT  
CAACTAAATTTATTAATTCTTTTTTTGAGGTGCACAAGAATCTATAATTTCTAATTATTGTTTG  
AATTTTTACACTATCAGACCTAGCTGAAGCTGATCCATATCCAGAATCGATGAACTTAACTA  
ATTCTAATTCGTCACCCACATTGCACAAAGATTAGGTGATATTCCCATCATTCTTTGTATG  
TTGTATCTACAATAACATCTTTAAAATAATGTTCTTTCAACATACTGCATCTACTATTTGTCA  
CTTGTGTTTGTGAAAGTTTTACTAATAAGCCCATTTTCAATCCTGACAATTGAACATGTTTAA  
TTATTTCAATTTAGTTTATTGTCTGTCATCTTTTCCATCTTAAACACAGCACAAGAATCATCAG  
AATATGTTGTAGCTAAATACTTGGATAAAGCAAGTGAACCTCAACATATCTTCTAACATAAGT  
TGTGATTGAATCCCCATAAAGGACCAAACCATCCTTCAATAGCACCTTTTTGACCTTTAGAA  
TAATATATCAAATCAGTGAAAGGTTTCATCATTAATGACAAAAATATTAGAAAACAAATATAC



AATTGAAATCATATTTTCATATTCTTCCATACCCTCAGTATAACCATACATGTTAGCTATTTCTTCAATTATGAATAATGTATTTTCCGGCCTTTGTGAAGTATTGTGGCCAGAATAGTCTAAAAATAATGAATAACAATTATCATCGGATATCATTGTGCTCATTTTATACATTATATCCCTTCGTTCATCTTCAGACATAGTCATCATTTGTCTGGTAATAATTTCAATTGCTCTCTTAATTCTTTCCATCATTGATGATATCCACAGTTTTAATCTAAAGCTTGCTATTCCAAAAATCGTGCAGCTGGTTTTAATTCTTTTTCTTTTTCAGCTAGTCTCACAATGAAATATTTTCTCATCTTTTTTAATTCTTTATCTTTCTATCATATACTCTCACTACTCTATCTTTTTCACTATAATATTCTTCCTTGTTGACTTTCAATTCATCTGAAAAATCTCCATCAAAATCATTTTAAATATAATATATTAATTCTTTAATAGAGTTGTTTTTTCGTCATATTCATCTTTTGTGCAAGCTTTATCAATTATACGTGACTCTAAATTCATTTCATCACCTTCTTCTAACATTTTTCTAGCCTTACATCTTTATAGTTTACAGGTTCAGAAACAATCAAATTATTATAATTTCCCCCAGCTGCCATTATTTGTAATTCTTGATCTAGAAATGAGTTGAATTTAATAAAAGTGGAACCTCTACCATACTTTTTGATATAATTCCTAATAACATTCATCCTGAATAGTCTTCTTAATTTTTCAATCTGATGTGAGTCAACAGGGTGATTTCTGTTTGTCTTTGAGTATACTTGGTTAAGCCTTGATCTTTGGAACTTCAGCATAGATTGTAGTTTTCCAATGCAAGACATTTAATGCAAGTCATACCATCTGATTCATCACACATCTTGATCAGTCTTCTGTATATCTGGTGATAATTCATATGAATCCAAAACATTGTGCGAGAATTGGCAAAGCAGCCGCAGTTCTTTGTATCAGCCATTAATAAACAAGTTGATTCATACAATGCTGCTAAACCATTCTCACTCTGTTTCAACTATTTGAGTTATGGATAATATATAATCTATGAATTGTTTTCCATTGGTTCTGCCATTTCTTTATGAAATTCAAAGTAACTCATGATCTATCATTGAGATAACATACCGAATCATCGAACCATCTCCAATGTTAATTGTTCCATTTCCATATGAGAATGCAGAAAAAGTTGATGAAATGTACCAAGTTGTCACAATGCCTTCTCCTTCTATTTCTAAATCAATTATTGATTGACCAGTGCTATATACTTCTACTCTCACTCTTTTTCTTCATTGAAATACAATTCATTTCCCTTGTTTGATTTGCATTTTCATTGACATATTGATTTTTATTTTCCTATTCATGTTTCAATGATGTCTAATAACCATGCTGATTTTATCACATCTTCAGAAAACCTGTGTTTCATATTGAAATTCCTTCTTATTAAGTAGTGATTTACTTAATTGATTTAATTCATGGTCATATAGATCAGCAGAAAAAGATAATAGTTTTCCAGAAGTGAGTGAGGGCCTACTCAAAGATCGCAATTTATTCATTAACCTTGATGCACATATGTTGAGAAGAACCACAATTCAGTTCTCCATGTCTTTCCTTCATCTCTGCTAAATAACAATTCCTAAAGCCACAAATCTTCTTTCAATTTTCAGTCCCCATTTTCTGGATACAAATGGGTTGATGTGACATCTCTATATTTTCTTCAGAAAATGATTTAAAAGGAGAATTAATTTTCTCAAGCAGTATTGTTTTGTTTTGATGTTCCCTTTCAATCCATTTGAATCCGACAGTGTGATTGAATTCATCTCAATTTAACTTCTTCCAATTCAGGTTCCATTTCAGCTTCTTGTTTTCTCAACGAGGTCAAGTCATGATGGAATTTCCCATACTTATTCAACACATTTTTAGTATGAATATGGGAATCATGAATAAGATTAATAGGGCGCTCATGATTACAATAATTGATAATAATAAATGTTTGCCAGTATATAAATATAAGCTTGTGGTTTATAAACCAAATGATTTTTATTAAAACGATGAGCATTTAATTACTGGACTAGAGGAAGCCTTTCCCTTGATTTTCTTTTTATCCTTTTTACACAATCTACAAATTTTCTTCTTAATTGGACTTCTTATTACTGTTCTTTTCTTGACTCCAAACATTTTCATGATGGATTTCAATCATAGTCAATCCTCCTGCAAGTTAGGTTGACATATTGAAGCTCAGGATTCTCCTCATCAGTGTAATCAGATGTGATTAATTCCACTTCCCTGAATGATAAAGGATAAACTGATTTCCATACCCATCAACCGAGGTATTTATTAAAGTCATCAACTGACCTGGCATAGACTATGCGAAGTCTTCAGAATCATCAGAGCAAGGGATTATGGTTTCATCACAGATAACTAATGCAATTTTACTCAAAA

AATCATTCGTCTTGAAAACCCATAATCCAAATAGTAAGACCATCTTTGTTTTTTCTTTAAAAG  
CATTTCTTTCTTTGGCTATCTCTAGTAGATTATTAAGTTCATTTGTTTTTTCTTCGCACAAGGT  
GATTTCAATCTCTTTTGTCCATTCAGGAAAGATGTGAGGGTCAACATAAGCTCTTTCTACTTT  
CTTTAGACATTCAATCGACATGTTTTGATTAAAAACAAGAAGTTTTTACTTTTTTAAAGTA  
AACCTGATTTCAATCTCTTTTGTCCATTCAGGAAAGATGTGAG

>Seq96 [organism=Xerochrysum ophiovirus\_brac] RNA2 genomic sequence

CCGATCTCTGAATTCCAGTTCGGAGGAGGACGGGGGCCATGAGGGGTAGTACCAGGATCGC  
AATGATCAGCAACATTGCTCTACAGATTTACATGGTGAGATGGTCGCATTGACTTGTATCCA  
CCTATGTAAATCTAAGAGTCAACGGGGAATCTCCCTATTCCGAATACTTTAGTTTTTATTTAA  
ACGAATACTAGGTGAAAATTACTCAATCATCCTCTTATAAACTCACCTGAGGCACTCTGTAC  
CATGAACCACATTCTACCATCCGAAGTGTTATCAATTACAAATTTAATCAAGTCCCCTTTCAT  
TAAGTGAATTGTGTCACCTTCATCAATCATCCTATCAATAATCCCCTGCTTTTTTAGTTGACT  
ATATGAAATAAGATTTGGATTAACATTGTTTCCTACAAAAACATGGTTCAATTCAACCATTTT  
TCCACACAAATCTAATACAAGGGAATTTATTTTCAAGTAACCCACATTCCACCTATTTTTGTTTT  
ACCAGAATGCCCTTTTAGATGAATAAAATGAGATGGAGCACCAGTGTCCAGGATATATCCA  
ATGTCACCTGAATAAGTTTTCTTGGACCACTCTTCAAGATTAATCACACAATGTGGAATTAAC  
TCTTCCACTGACTCTTCTTTGATCTCACTAATTAATGAAGTTGAGTTTCTTCTAGGAATATCTG  
AATTCCTTTCTGCTACATTTTCTAGCAACCCATCAGTGAGTATTTCTTCAGCTCTTTCTAACCG  
ATCTAACTTCTTTTCAGTTAATAGAGAAGCCCTTTCAAGCTTCTTTCCAATGTTTCTCAGAAC  
AGAACCTGATTTGATTGTTTTTCGGGTGACTTGTTGGATCAATGTAAACACTTTTGATCTTTC  
TACTTCATAAGTTCCAGGAAAATAAGATGAATGTACGTAAAAATCCTATCATTAAGGAAGCAA  
ATGAACCAAACCTTTGTTGGTTTCACTTCACTGTTGTTATTAACCTTTATCTTTTTAATATCATC  
TTTTGGAACAAAAAAGACATGTTTCTCTGACATTGACATTTTCAATTTATTGCAGCTGTAAT  
ACTCGCAATTACTCTATTCTCTTTGCTTCCTTTTTCATCCTTTTCAACCAAAGAGAATGTAAT  
CATTTCTCCTTTATTCTTACGCTGATCAAACAGTGGACAGTAGAGAATTTGTACCTTGCTCAA  
CCTCATATAGGGTTTATCAGCTACTTTTATTATTTTCTTCAATCCAGACCAGACTTGTGCGAA  
TGAACCTAACAGTAAAAGATGCTTCCCCAGTTTTTCTTTTCAAGTTCAGCTCTATTGGTGAAAA  
TGCTGAATTTATTCTACCTCTAGTCATTTTGCTAAATTCAGCTGCCATGCATTGAACTTCAGG  
ATTCAATGGCTCATCTCCTGACAAGCTGATTATTGTTCCCTTCGCCAGCAGGGAAAGTTTCACT  
TATCGCCCTTTCAAGTGATATTTCGTGTTCCGATCGGTGGAGTTCCGTAGGAAGTGTTGTTGA  
TCTCCTGAGTAATCGTATTCCAGAGTTGGCAGATTCCATCGAATTGTTTTCTGTTTAAACAGCA  
AGGAGA

>Seq97 [organism=Xerochrysum ophiovirus\_brac] RNA3 genomic sequence

CCGATCTTGTAGCCATTGTTCCCTACTGACCTAGGAGTTTTATTAAAACGAAAGGCAGTGCA  
ATAGAAATACTGCAAAGAACTTACTTTGCATTGCCAGCAACCACAACAACTCCTTCCCAT  
ACATATTCTTCAAGGTATCAACTGTAATTGATGAAAAGTCACAAGATGAATCGGTCAAGTTT  
TTATGGATCCTTGTTCCAGAGGGGCCAGTCATCCCAATCAAGTAGGAGTCCTTCAGAAAAGC  
CTTATTGTCTTCCAGAGTCAGATTGTCAACAAGCTCAATCCTTCCTTTTCAATTGACAAAGAAAA  
TACAATTGCAGTAGTTATTTTCTTGTGAGGTTTGTACTGATGGCTTGAATCCATTGAGTGG  
GTGCATCCTGAGCATTGCTTCAAAATCAGTTTGAACAGAAAGAAGATAGTCTACAATGTTGT

AGGCTTTTTGCAGTTTAAGCCTTTCATTGTTTACCTTTTCAAGTTCTTCCATATTTTTTGGGAAG  
AGCAGGCATTGGGGCTCTCTCAAACCTTTGAAGCAAGAACAGCATATTTCACTATCTTGTTTC  
CTGCAACAGATAGTTTACACCTGGCACAATCAGCATCAGGAAGAGTAGCTGTATCAACTTTC  
AAAAAGATTTTTTGAGGAACTTCTTTGTTGAAGTGCTTGATAAAAAGCTGAGGGATCTCCTT  
CATCATCGTGTACTTTCCATCCAAAAGATGCTTTTGGATATAGCTTGGTATGGGTCGTTGGTC  
TTTTTCATCAATGATTGGCAAACCACCTTGACATAAACCATGACAGTACAAGCTCTCAACA  
ATCCTTTCCCTTTCTTGATGTTTTTGGCCATAAACTTTCTTCATCTTGTCAACAACATTAAC  
ATGAAACATTCCATTTGATTTTTTCGTTGTTACCTAACGCTTTGTAAAGTATGGCATCAAGAGG  
AAGAGTACCAGCTCCAAGGTATTCAAACAACTAACTTCTTCATTGGTGTCTGCAAATTTAA  
ACACTTTTACTTCCATTGGTCCATAACCTTCTCCATCAGCAGGTAGTTCTTTGTAAAAGTGT  
CAAGTTCTGCTTGAAGTGCTTCAATATTCACTTCAAAAGAACGAGCAGCTAGTTTTGCCCTCA  
ATTCTTCACCTTTGATTTCTTCATCATTTTTCTCTAGCTCTGGGATCCTTTCATCATCATCATC  
CTTGCTTTTATTACGTTGGAAGTGTTGGTGTCTATCCCTTCTTCAATATCCTTGTACATGAGT  
TTTCCAGTGTGAGGGTCAAGAAACATAATATGATCCTTGCTAGGAGTGAGAGCGAGTTCATC  
GAGAGTCCTGATATTGATTTTGATTTTCATCCCTATCACTGTCAATTACTCCGAATTGTTCAAG  
GGTTTTCCACTCTTCTTTGCTCAATTTTTGTGCGGTGCTTTTTGAACTTGTTGAGAACTCTGTTA  
AGGTGAGAAGCTTTGATAGTTGACATTTTGCAATAAGATGGAAGTCAATAAAAAAGTATATA  
ATTGAAAAATTAAACCCATCCCTATCACTGTCAATTACTCCGAATTGTTCAAGGGTTTTCCAC  
TC

>Seq98 [organism=Xerochrysum ophiovirus\_macra] RNA1 genomic sequence

TCTTCATAATCACATCCTTCTTCCAGATCGCAATGATCAACAGTGTTGCACTTAATACTACAA  
TAAGTTACATTAAAATATATTACATAATATACATTAAATTGATTTACCATTCAAATTCATCTT  
CATAATCACATCCTTCTTCTTCTAATAATTTTAGGTTTTCTCATATGACCTATTCTATTAGC  
CTCTATTTCTCTTGAGTGTTATCTGTAAATGTTGGAATTGTTTCAGGGTCAATAATTTCTTCA  
GGTATATTATACATTGTTTCTGTTTCTTTCCTTACATTTGAACTAACATTGAGAAAAAATCT  
GGTATTGCATTCCCCTCATCATCAAATTC AACATTATTTTCTAAGCTTTCTACTATTTTCATTA  
ATTCTGTTGAACTTAATTCAGGTTTCATCACATGCAGGTGTGTCATCAATGTCAGCCACCTTT  
CAGTTGGATTTTTCTTATACCTAGGAATAAGGTTGAATTTTTCTTCAATAATCTTATTCTATT  
TATTAATAATTTGTAATCCATAATCTTATTCTAGTTGTTTTACCTTTATGTTTCATTAACTCA  
TTTAGACTACCCCTTCTCATTCCTGTCAGAAGAATTAAATTTCCATTGCTTTGCCTGATTTAT  
AAGAAACACAAGCTATTTTTGCTGTTTTGTGTGTTGCATCAATAGCTTTTATTTCTTCTTTCT  
TAATTCTGTAAATTTATAATGTCTATCAATGAATTTAAAGAACTTTTTTATCTGATTCTTTA  
ACTATTTTAGTAAAAATTTCCCATATAAATTTAGTTTTAGCATAATTTAAACCATTTGTATCA  
AGTTCTAGGTGAATTTCTTCTAATTCTGATTTGTTTCAGGTTATCAAAAGATTTAATTGCCCA  
ACAAAAGGAGTCGAAAGAATCTTATTATTTACTCTTACAAATACATCATCAGAATATAAATC  
ATTATAAGTTTCTGTAAATAAGCAATTATCATTTGATATAAATCTTGCTTCCCTAAATTCTAT  
TTTTTCACAGATTCCTGGATTGTTCTCTATAAATTTCCACTAATAAATGCCATTGAATACTTT  
TCTACTTCTTCTTTGGTTGAAAAATGTGAATGGAAAGATAATGGTACATGATTTACGTCACGT  
TCAGGATCTAATATCATTTACATAAGAATTCATCTGATACTGTTTCCATGGTGTGGTCTAAT  
ACATTCTCTGGTTTTCTGGGAAATGGTTTTAAGCCAACCATGCACCTTAATATTATTAGTTAAT

CTCTCTAATATAACTGAGTCAGTAAATTTTCTTACTTTTAATGATCTTTCCAAATTATTATCAC  
TTAATTCTTTTTTTGGTTCAATAGTTAAATAAATGACTCCTGGTGATGATAAAGTTGGAATCC  
TTAAATTCAATATTGCATTGTTATCCAAAAATGTCCTAAGTTCTTCGGATTCAAATATTTCAC  
ATGTAGTATTAAATCTCATGATAATCTTTTTATTTTGTGTTGATGACTAATTCTATCAATGAAA  
TTAATTTTTCTTTTGTCCAGTTAAGTGTGAAATATCTAATAAAAAATATATCATTTTTCTAAAT  
ATTTTACATATTCAAATTCATCAAGTGCATTCCAAGATGCTTTCTTCTTTTCCATACCTGATAT  
TCTATTAATTGTATTGTAACCATCTAATCTTGACACTGAATGATGATTAATATCTTTTTCAAT  
CATAGCTAAATGGAAGTCACCTCTTCCTCCAAATAAATCAATAATCTTATCATTGAGGTCCT  
GATTTATGAACCTTTCATTACATAATAAATCAAGTAATCCTCTTGCTGAAGGATAGATATCTG  
ACTTAGTAGGAGAAGATACATGTTTTGGTAGACAATACATTGCAGCCATCATTTCATATCCT  
TTGATGGCAGCTTTCATTGCCTTTGTATTTTCTAAATCCTTTGGTTGTACTATATGTGAATCAA  
AATCAATAAATCCATATTCAACATTGTTATTCTTCATTATTTCTTCTGATAATTGTTCTTTATA  
ATACTCAGTTATCCGTTCTTGTTTAAATCTTCTTCCATGTAAAGAATCACATAATTCTTCACA  
TGCTGACTCGAGTTCATCAAAAGAATAGGATAAAACAGGCATTGCATTAATCAATAAATTAC  
AGATTTTCTTATCTTTAGTCCAAAAATGATGTTACCTTTTTTAATGTTATTTAATGCATTTCT  
TGAATTGATTTTTGTAAATCGTCTATTTACTCTTATTATGTTCTCTGTTTCAGAAACATCCTCT  
ACCTTAAATATTAATCCGCATGAAATTACAAACAATTTTAACAATGAAATTCTATAACTAAC  
TGAAAAACCACTTAGTGCCAATTCTTTGACCCAAGATTTAGAATCATGTTCTCTATTGAATAA  
TTCATTATTAATTAGAGACCTAGTTATTGCTTTTAAAGGTGTTTCATTCCCTATAATATTTAA  
ATCTTTGTAATGATTATAAAATTCTTCGAAAAAGTATTCTTTGGATGCAAAATCACTTAAATT  
AGGAACAATCTTTTGTAGAGTTGTTAAGGGAATTGTTTCTGGAGAAATTATCAACTGATCTT  
CCATATAATTATAAAGATTTATAAATGAGGATTCATTCTTAATAATTCGTCTGGTATGACTG  
CACTTTCTGAAATGAACTTTCAGCTAGGCACTCATCTTTTGCAATGAAATTAGAATATGACT  
TATAAATGAATGCTTTTCTTTGACTTTCTCAAATGGTATTAATGTCATGGCTTTTTTTGACAT  
TCCAATATGTAAATGTCTTATTCCATGGATGTTGAATGTCACATCTTTAATTCCTCTAATAT  
ATCAGATCTAATGCTCAAGGTCCTTAGTTCTTCTTAGTTGGTTGTAATATTC CATACAAAC  
CTTTACTATAGTAATAAGATATTGTAAATTCAAGTTATTGTCTTCTCCACCTGTTGAAAAAAT  
GAGTCCTGTTACTCCTGATACATCATATTGTCCACTTATCCTGTTTGAGCTTAAGTCACCAGT  
CCTAGGGTTAAATCCTCCTGCAGAAGCCCTATGAAAGTATCTTCCTCCTCTTGGACAAACTA  
CATAATCAACCATATCTTTAAATTTACAGTTGAAAATGTTGACAATGTTAGGTCACAAACA  
CTTATTAGTGCTTCCCTTTCTTCATTGGATATTTCACTAAATCTTTCTAATTCATTATAATCC  
ACTTAGTATACCTAGTAAGTTCGTATGCACTAAAGATTAATTTAGACTGAAATAATCCTTGA  
ATACCTATATCTCTATCAAATTTTGCTAGATTTATATGTGATTTTCATTGGTGGATGTTTTCTAG  
GGCCAGCACTAGTCAAAACCGTATCTCCTTTGTATATAGGTAATATGTTATGTGATAGCACT  
CTGTGTTCTAATGCACCTAATAACGGAATTTCTTCTATATTAATAAAATTTAATTTTATTGGA  
ATTCTTTCTTCTAATTTTATATTCAATTGTCTTTTCTTTATTATTTCTTTTCATCTACAATGGACCA  
ATAAGAGACTAAGATTAACCCGGATCTCACTATTTCAATTTTTCTATTCTTTTTCCATACTTTG  
TGCCACAATTTACCCATTTCTTCTTTGCTTACTAATTGCATAAAAGTAGATGAATTTTCTACTT  
TACTGCATATTGTTTCTACATAGCTGAAAATTGACTCTTCATAATATTTACCAGCAATCTTG  
CTGAAAAACAATCTTTGAATGCAAAAACTAATTTATTTAAAAATCTATTTTATTATTTTCTT

TTTTCATTTCAAATATCTTTTTCAAATTTTTATTTACAGTGTGATTCTCCAATATCCTTTCTACT  
TTATCTGCTAATACTGTTCCCTGTATCAAATCTTCCTCCTGTTAATGGGTACTGATTAGTTACAT  
AATGTTCTACTTTAGTATTAATAATTTATTAATTCACCTATAAAAAGTCTTTCCCTTGATAAGATA  
ATAAACTCTGTACATAGATTATCCTTTTTACATTAGACAATGAGTACCCAGAAATATGAGCA  
TCAGGAACTGGAGTCATTGCATAACCATACATTGTATATGGTAGATACATAAAAGATAATAT  
CAGTGATTTCACTTCATCTATTTCTCTGTAAATACAAAAAAGTTAACTATGTTCTCATCTCTT  
TTATCGACTAAATCATTTATTTCTTTTTGTCAAGTTTTCTTTAATAATTCTTTCTGGTGTGT  
GGCACTAAAACCTTTCAATGATCTATATCTATTATCTACCTTAAGATATGGAATCTGTTCAAT  
TAAGCTAATCATTTCTTTTTTTGATATACACAAAAATCTATAATTTCTAATAATTGTTTGAATT  
TTTACACTATCAGACCTGGCAGATGCAGAACCATAGCCAGAATCAATGAATTTTATTAATTC  
TAATTCATCACCCACATGGCACATAAATTAGGTGATATCCCATCATCCTTTTATATGTAGT  
ATCTACAATGGTATCTTTAAAATAATGCTCTTTCAACATGCTGCATCTGCTGTTTGTTACTTG  
GGTTTGTGAAAGCTTTACAAGTAAGCCCATCTTTAACCAGATAATTGTACATGTTTTATTAT  
TTCATTAAGTTTATTATCTGTCATGTTTTCCATTTTAAAACTGCACAAGAATCATCAGAATA  
AGTTGTGGCTAAATATTTAGAAAGAGCAAGAGAACTCAACATATCTTCTAGCATAAGTTGTG  
ATTGAATTCCTCATAAAGGACCAAACCATCCTTCAATGGCGCCTTTTTGACCTTTAGAATAAT  
ATATTAAATCAGTAAAAGGTTTCATCATTAAATGACAAAAATATTAGAAAACAAATATACAAT  
AGAAATCATATTTTCATATTCTTCCATCCCTTCTGTGTATCCATACATATTTGCTATTTCTTCT  
ATTATAAAACAAGGTATTTTCTGGTCTTTGTGATGTGTTATGTCCAGAGTAATCTAAAAATAAT  
GAATAACAATTATCATCGGATATCATGGTGCTCATTTTGTACATTATATCTCTTCTTTTCATCTT  
CAGACATAGTCATCATTTGTCCTGGTAATAATTTCAATTGCTCTCTTAATCCTTTCCATCATAG  
ATGATATCCACAATTTGAGTCTAAAACCTAGCAATACCAAAAAAGCGTGCAGCAGGTTTTAAT  
TCTTTTTCTTTCTCAGCCAGTCTCACAATGAAGTATTTCTCATTCTTTTCAATTCCTCATCTTT  
TCTATCATAAACTTTAACCCTCTAGCTTGATTGCTGTGATACTCTTCTTTATTTACTTTTAAT  
TCACTTGAAAAATCTCCATCAAAGTTATTTTAATGTAGTAAATCAATTCCTTAATAGAGTTT  
GTTTTTTCATCGTAATCATCTTTGGTGCAAGCCTTGCTATTATTCGAGACTCTAAATTCATTT  
CATCACCTTCTTCCAGCATCTTTCCCTAACCTTACATCTTTATAATTAACAGGCTCTGATACTA  
CAAGGTTATTATAATTTCCCTCCAGCTGCCATTATTTGTAATTCTTGATCTAAGAATGAATTTG  
AATTTAATAGCAGTGGAACCTTCCATATTTTTTAATATAATTTCCGATCACATTCATCCTGA  
ATAATCTCCTTAGTTTTTCAATCTGGTGTAATCGACAGGATGATTTCTATTAGTCCGTTGAG  
TATACTTGGTTAAACCTTGGTCTTTGGAACTTCAGCATAAATTGTTGTTTTACCAATACACG  
ACATCTTAATGCATGTCATTCCGTCTGATTCATTACATATTTTAATCAATTTTTCAGTGTTTTC  
TGGTGATAGTTCATATGAGTCTAAAACATTGTCAAGAATTGGAAGAGCAGCTGCAGTTCCTT  
TTGTGTCAGCCATCAGTAGGCAAGTTGACTCATACAACTAGCCAATCCTGTCTTTTCTTTG  
TTTCAACGATCTGAGTTATAGACAATATGTAATCTATAAATTGTTTTTCCATTGGGGTTGCCA  
TTTCCTTGATGAAATTCAAAGTAAATTCATGATCAATTATTGATATAATATCTAATCATAG  
AACCATCTCCAATGTTAATCGTTCCATTGCCATATGAGAATGCAGAAAAAGTTGATGAAATG  
TACCATGTTGTCACAATACCTTCTCCTTCAATTTCCAGATCAATAATTGACTGTCCAGTACTG  
TACACTTCAACTCTTATTCGCTTTCCTTCATTGTAATACAATTCGCTTTCCTAGTTTGATTTT  
GCATCTTCATTGACATGTTAATCTTGATTTTCTATTTCATAGTTTCTATAATATCTAATAGCCA

TGCAGACTTTATCACCTCCTCAGAAAATTCAGTTTTTCATGCAAAAATTCCTTTTTATTGAGTAG  
TGATTCACTTAGCTGATTAGTTCATGATCATAAAGATCAGCAGAAAAAGATAACAATTTTC  
CAGCAGTGAGCGAAGGCCTACTCAGGGATCTTAATTTGTTTCATTAATTTTATGCACATGTGTT  
GGGAAGAACCATAATTTAGTTCTCCATGCCTTTCTTTTCATTTCTGCTAAGTAACAATTTCTAA  
GTATCCACAGGTCTTCTTTTCATTTTCAATCCCCATTTTTCAGGGTATAAGTGAGTTTCTGTGA  
ACATTTCAATGTTGTTGTCAGAGAATGATTTAAAGGGAGAGTTGATTTTTTCTAGCAATATTG  
GTTTTGTTTTAATGTTCCCTTTCAACCCATCGGAATCCAACAGTGTGATTAAATTTTCATTTCAA  
TCTTGACTTCCTCTGAAGTAGGTTCCATCTCAGCTTCTTGCTTCCTTAATGACATTAAATCATA  
ATGAAATTTCCCATATTTGTTTCAGAATACTCTTGGTGTGAAAATGAGAATCATGAATGAGGT  
TAAGTAGGGCGCTCATGATTACAATTTGAAGTAGCAATAATAATTTAAAATCCAGTTCTTAA  
AATTAAGCTTATGGTTTGATAAACCAAATGATTTTTATTAAAACGAGAAACAATTAATTACT  
AGAAGTAGAAGAAGCTTTGCCCTTAAGTTTCTTCTTATCTTTTTTGCATAACCTACAAATTTT  
CTTTTTAATGGGGCTTCGAATCACTGTCCTCTTCTTAACCTCAAACATCTTCATAATCGATTTCA  
AACTCATAATCAATTCTTCTACAAGTCAGATTAACATATTGGAGTTCTGGATTTTCTTCATCA  
GTGTAATCAGATGTAATCAACTCAACTTTCCCTGAGTGATAAAGAATGAATTGATTTTCCAT  
GCCCATTAGACGAGGTATCTTATTAAAGTCATCAACTGATCTAGCGTAAACTATCCTGAGTT  
CTCCGAGTCATCAGAACATGGAATTATTGTATCGTCGCAGATTACTAGTGCAATTTTACTCA  
AATAATCATTGTGTTTTGAATATCCACAATCCAAACAATAGAACCATTTTTGTATTTTCTTTGA  
AGGCATTCCCTTCTTTAGCTATTTCTAGTAAATTGTTAAGCTCAGTTGTTTTTCTTCACAAAG  
AGTTATTTCAATTTCTTTTGTCCATTCTGGGAATATATGAGGATCAACATAAATTCTTTCAAC  
TTTCTTTAGACATTCAATTGACATTTTTTTGATTGAAAATGAGAAAAAGTTTTTACTTTTTAAA  
GTAAACCCACAGAGTTATCTCAATTTCTTTTGTCCATTCTGGGAATATATGAG

>Seq99 [organism=Xerochrysum ophiovirus\_macra] RNA2 genomic sequence

TTTAACAATTAAACTGAATTCCAGTTCGGCGGAGGACAGGGGCGGACTTTCCCACTCAAGGGA  
TGGTACCAGGATCGCAATGATCAGCAACGTTGCTCTATAGATCTACATGGTGAGATGGTCGC  
ATTGACTTGTATCCACTCATGATGATCTAAGAGACAACGGGGAATCTCCTTATTCGAATAA  
TTTAGTTTTTATTAAAACGAATACAAGGTGAGAATTGTAAACTTATCCTCTTCTAAGCTCACC  
AGAGGGACCTTGTTTCATGAACCACATTCTACCATCCGATGTGTTGTCAATGACAAATTTAA  
TTAAGTCTCCTTTCATTAAGTGAATAGTATCACCTTCATCAATCATCTTATCAATTATATTCTG  
TTTTTTAAGTTGACTATATGAAATTAGATTTGGATTAACATTATTTCCGACAAACACATTGTT  
CAGTTCAATTATTTCTCCACACAGATCCAATACTAATGAATTTATTTTCAGTAACCCACATTTCA  
ACCTACTTTTGTGTTTTCTGAATGCCCTTTTAAGTGAATGAAGTGAAATGGAGCACCTGTATC  
CAATATATAACCTATATCACTTGAATACACTTTTTTAGACCACTCTTCAAGATCAATCACACA  
ATGTGGAATTAATTCTTCCATAGATTCCTTATCAATTTTCATTAATTGTCGAAATTGAATTTCTT  
CTTGGGACACTTGAATTTCTTTTCAGCTACATTTTCTAACAACCGTCTACAAATATTTCTTCA  
GCTCTTTCTAACCGGTCTAATTTTTTCTCAGTTAATAAAGAAGCTTTTTTCAAGCTTTTTTCCAA  
TGTTCCCTAAGCACAGATCCTGATTTAATTGTTTTAGGGTGACTTGTTGGATCAATATAAAACA  
CTTTCGATCTTTCTATTTTCATATGTTCCAGGAAAATAAGATGAATGAACATAAAAAACCTATC  
ATCATGGAAGCAAATGAACCAAATTTTGTGTTTCATTATCAACTGTTGTTATTAATTTGATC  
TTTTTAATATCAACTTTTGGAACAAAAAATGACATATTCATCTCAGACATTGACATTTCAATTT

ATTGCGGCAGTAATACTAGCAATCACTTTGTTCTCCTTACTGCCCTTCATCCTTTCATCAATT  
AGAGAGAATGTAATCATTCTCCCTTATTTTTTCGTTGGTCAAATAGAGGACAGTAAAGAAT  
TTGTACTTTACTCAATCTCATATAAGGCTTATCAGCAACTTTAATTATTTTTTTCAATCCAGAC  
CAAACCTTGAGCTAAAGAACTAACAGTAAATGATGCTTACCTACTCTTCCTTTCAAGTTTAG  
CTCTACAGGAGAAAAATGCTGAATTTATTCTACCACAAGTCATTTTGCTAAATTCAGCAGCCA  
TACATTGCACTTCAGGACTTAATGGCTCATCTCCTGAAAGACTGATTATTGTTCTTCTCCAG  
CAGGAAAAGTTTCATTTATCGCCTTTTCTAATGATATCCTTGTTTCTGATCGTTGAAGTTCCG  
TGGGCAATGTTGTTGACCTCCTGAGTAGACGTATTTTCAAGAGTTGACAGATTCCATCGAATTG  
TTTTCTGTTTAACAGCAAAGACGTTTTTCCTTTCAAAAAGTAAACCATCGTTCCTTCTCCAGCA  
GGGAAAGTTTCAT

>Seq100 [organism=Xerochrysum ophiovirus\_macra] RNA3 genomic sequence

ATTTATGATGTAGCCATTGTTCCCTACTGAACCCGGAGTTTTATTAAAACGAAAGGCAGTAA  
AGTAGAAATACTGCAAAGAACTTACTTTGCATTACCAGCAACAACAACAAATTCTTTCCCA  
TACATGTTCTTCAAGGTGTCAACAGTAATTGATGAAAAGTCACATGATGAATCGGTCAGATT  
TTTATGGATTCTTGTTCAGAGGGCCCAGTCATCCCAATCAAATAGGGATCCTTCAGAAAAG  
CTTTGTTGTCTTCAAGAGTCAAATTATCAACAAGCTCAATTCTTCCTTTCATAGACAAGGAAA  
ATACAATCGCAGTGGTTATTTTCCTGGTCAGGTTGGTCACTGATGGCTTAAACCATTGAGT  
GGATGCATCCGAAGCATTGCTTCAAATCGGTTTGAACAGAAAGCAAGTAGTCTACAATGTT  
GTAGGCTTTTTGTAGTTTAAAGCCTTTCATTGTTTACCTTTTCAAGTTCTTCCATATTTTTCGGA  
AGAGCTGGCATTGGGGCTCTCTCAAACCTTTGAAGCAAGTACAGCATATTTCACTATCTTGTTT  
CCTGCAACAGATAATTTGCACCTGGCACAATCAGCATCAGGAAGAGTAGCTGTATCAACTTT  
CAAAAAGATTTTTTTGAGGAACTTTTTTTGTTGAAGTGCTTGATAAAAGCTGAGGAATTTTCA  
TCATCATCTTTAACTTTCCATCCAATAGATGCTTTGAAATATAGCTTGGGATTGGTCTTAAAT  
CTTTTTTCAATGATCGGCAAACCACCTTGAACATAAACCATGACAGTACAAGCTCTCAAT  
AAACCTTTTCCCTTTTTAATATTCTAGCCATGACACTTCTTTCATTTTCTCAACAACATTGA  
CATTGAACATTCCATTAGATTTTTTCAATTGTTTCTAGTGCCCTGTAAAGAATGGCATCAAGAG  
GAAGAGTTCCAGCTCCAAGATACTCAAATAAGCTACCTTCTTCATTAGTATCTGCAAACCTTA  
AACACCTTAACTTCTAATGGTCCATAACCTTCTCCATCAGCAGGTAGCTCCTTGTAACCTTA  
TCAAGTTCTGCTTGAAGTGCCTCAACATTTACTTCAAAGGAACGAGCAGCTAGTTTCGCCCTC  
AGTTCTTACCTTTAATTTCTTCATCAGTTTCTTCAAGTTCAGGGATTCTTCATCATCATCAC  
CTGTTTTGGTGTTAGAAGTGTATCTCCTTCTTTCGTCATGTCTTTATACATGAGTTTTTC  
CGTTTCTTCGTCAACATACATAATATGATCTTTACTAGGAGTGAGAGAAAGTTCCTCAAGAG  
TCCTGACATTGAGTTTAATTTCAATCCCTATCTTGTCAATGACTTTGAATTGTTCAAGTGT  
CCATTCGTCTTTACTCACTGTTTTTCAAGTTCTTCTTCATTTTGTGAGAATTTTGATGAGGTGT  
GAAGCTTTGATGGTCGACATTTTACAGCAAGATGGAATTCAGCAAAAAAGTTTATAATTGAA  
AAATTAA

>Seq101 [organism=Xerochrysum ophiovirus\_visco] RNA1 genomic sequence

TTACCATTCAAACCTCATCTTCATAATCACATCCTTCATTTTCTAAGAGTTTTAGATTTTCCTCA  
TATGATCTGTTTCTGTTAGCCTCAATTTCTTCTTGAGTATTATCAGTGAATATCGGTATAGTG  
GTTGGATCAATGACTTCTTCAGATATATTATACATTTTTTCTGTTTCCTTTTTTACATTTGATA

CTAGCATTGAAAAGAAATCTGGTATTGCATTTCCCTCATCATCAAATTCAGTGTTACTTTCTA  
GACTTTCAACTATCTTCATTAATTCTGTTGAACTCAATTCAGGTTTCATCACATACAGGTGTAT  
CATCAATGTCAGCCCACTTTTCATTTTCAATTAGACTTCTCCTATATCTTGGCAAGAGGTTGA  
ACTTTTCTTTTAATAATCTTATTCTATTTATTAGTAGTTTATAATCCATAATCTTATTTCTTGTA  
GTTTTACCTTTATGCTTCATTAATTCATTTCAGACTTCCTCGTCTCATCCCAGTTAGTAATATTA  
AATTTTCCATTGCCTTACCTGATTTATAAGAAACACAAGCTATTTTCGCAATTTTGTGTGTTG  
CATCAATAGCTTTTATTTCTTCTTTCCTCAATTCTGTCAAGTTTATTATGTCTATTAATGAATT  
CAGTGAAACTTTTTTGTCTGATTCTTTTACAATTTTAATAAAAATTTCCCACAGTAATTTAAC  
TTTTGTGTAATTTAATTTATTGTTGTCAATCTCCAAATGGATTTCTTCTAATTCTGATTTGTTA  
AGATTATCAAAGGTTTTTATTGCTTTTACATAAGGAGTAGAAAGGATCTTGTTGTTGACTCTT  
ACAAAAACATCATCAGAATATAAATCATTGTAAGTTTCTGTATATAAGCAATTATCATTGTA  
AATAAATCTTGCTTCTCTGAATTCTAGCTTACTACATATTATTGGATTATTTTCTATAAATGTT  
CCACTAAGAAATGCCATTGAATATTTCTCTACTTCTTCTTTGGTAGAAAAGTGTGAGTGAAA  
AGATAATGGTACATGATTAACATCACTGTCTGGATCTAATATCATCTCACACAAAAAGTCAT  
CTGATACTGTTTCCATTGTGTGGTCTAATATGTTTTCAGGTTCTCTAGGAAATGGTTTTAAAC  
CTACCATGCATTTTATATTGTTAGTTAATCTTTCTAGTATTACTGAATCAGTAAATTTTCTTAC  
TTTTAATGATCTTCAAGAGTTTCATTACTTGGTGCTCCTTTTGGTTCAATGGTTAGGTAAAT  
GATTCCTGGTGATGATAAGGTTGGAATCCTCAGGTTTAGTATTGTATTGTCTCTAAAAAATT  
TCTAAACTCTTCTGATTCAAATATTTACATGTTGTATTGAATCTCATAATTACCTTTTTATTT  
TGTTTTATAACTAATTCTATGAGAGAAATCAATTTTTCCTTAGTTCCAGTTAAGTGTGAAATA  
TCTAATAAGAATATATCATTCTCTAAATATTTTACATATTCAAATTCATCAAGTGCATTCCAT  
GATGCTTTTTTCTTTTCCATTCTACTATTCTATTAATGGTATTATAACCATCTAGTCTTGATA  
CTGAATGATGATTGATGTCTTTTTCAATCATTGCTAGATGAAAATCACCTCGGCCACCAAAT  
AAATCAATTATTTTTTCGTCTAAATGTTGATTTATAAATTTTTTCATTGCACAATAGACTCATT  
AATCCTCTAGCTGAAGGATAGATATCTGACTTGGTAGGAGAAGATACATGTTTTGGTAAGCA  
ATACATTGCAGCCATCATTTTCATATCCTTTAATAGCAGCTTTCATTGCTTTTGTATTTTCTAAA  
TCTTTAGGATGTACTATATGTGAATCAAATCAATGAATCCATATTCAATATTTTTATCTTTC  
ATTATTTCTTCTGATAGTTGTTCCTTATAATATTCTGTAATTCTTTCTTGTTTAAATTTCTTCC  
ATGCAATGAATTACATAATTCTTCACAAGCTGATTCTAGCTCATCAAATGAATAAGACAATA  
CTGGCATTGCATTAATTAATAAATTGCATATTTTTTTATCTTTTATCCAAAAGTGATGTTCTCC  
CTTTCTTATGTTGTTAGTGCATTTCTTGAATTTATTTTTGTCAATTGTTTGTGTTACTCTTATTA  
TGTTTTCTGTTTCAGAAGCATCTTCAACTTTAAAAATCAGTCCACATGATATCACAAACAATT  
TTAACAATGATATCCTATAACTGACTGAAAAACCACTTAATGCTAATTCCTTGACCCAAGAC  
TTGGAGTCATGTTCTCTATGAAATAATTCATGATTGATTAAAGATCTGGTTATTGCCTTTAAG  
GGTGTTCGTTTCCTATTATGTTTAAATCTTTGTAATGATTATAGAATTCTTCGAAAAAGTAT  
TCTTTAGAAGCAAAGTCATCTAAATTGGGGACTATCTTTTTAAGTGTTTGAATGGAATAGTT  
TCCGGGGAAATTATCAATTGATCTTCCATATAATTGTAGAGATTAATAAATGATGATTCATTT  
TTTATAATTTTCATTGGGTATGATAGCACTTTCAGATATGAATTTTCCTGCCAAGCATTTCATCT  
TTTGCTATAAAATTTGAGTATGATTTGTATATGAATGCTTTTTTCTTTACATTTTCAAATGGAA  
TTAAGGTCATTGCTTTTTTTCGACATTCCAATGTGTAGTTGATTTATTCCATGAAGATTGAAAG



TAACATCTTTAATTTCTTCTAAAATATCAGACCTGATACTCAAGGTTCTTAGTTCTCTTCTTGA  
AGGTTGTAACAATCCCATGCAAACCTTTTACTATAGTGATTAGATATTGTAAGTTCAAATTATT  
GTCTTCTCCACCTGTAGAGAAAAATGAGGCCTGTTATTCTGAAACATCATATTGACCACTTAT  
TCTATTTGAACTTAAATCACCGGTTCTGGGATTGAACCTCCTGCAGAAGCTCTATGAAAAT  
ATCTTCCTCCTCTTGGACAACTACGTAATCAACTATATCTTTAAATTTTACAGTTGAAAAAG  
TAGATAATGTTAAATCACAAACACTTACTAAGGCATCTTTTTCTTCGCTGGATATCTCGCTAA  
ACCTTTCTAATTCCATCATTATCCATTTGGTATATCTGGTAAGTTCATATGCACTAAAAATTA  
ACTTAGTTTGAACAACCCCTTGAATACCTATGTCTCTGTCAAACCTTAGCTAGATTTATATGTG  
ATTCATGGGTGGATGTTTTTTGGGGCCAGAACTAGTTAATACTGTGTCTCCTTTGAATATAG  
GCAATATGTTGTGTGATAAGACTCTGTGTTCTAAAGCTCCTAATAAAGGTATCTCTTCTATGT  
TGATGAATTTTAATTTAATTGGGATTCTTTCTTCTAGTTTTATGTTTCATTGTTTTTTCCTTATTG  
TTCCTTTCATCAACAATAGACCAATAGGATACTAAATGTAAGCCAGACCTGATTATTTCTATT  
TTTCTATTCTTTTTCCAGACTTTGTGCCATAATTTCCCATTTCTTCTTTGCTTACTAATTGCAT  
AAAAGTAGAAGAATTTTCTACCTTGCTGCAAATTGTTTCAACATAGCTAAAAATTGATTCCT  
CATAATATTTACCTGCTATTCTAGCAGAGAAACAATCCTTAAATGCAAATACTAATTTGTTTA  
AAAACCTCTAGTTTATTGTTTTCTTTTTTCATTTCAAAGACCTTTTTCAAATTTCTATTTGTGGT  
GTGATTTTCTAATATTCTTTCTACTTTGTGAGACAAAACCGTTCCTGTGTCAAATCTTCCTCCT  
GTTAAGGGATATTGATTAGTCACATAATGTTCCACTTTTGTATTGAAATTTATTAATTCACCT  
ATAAAAGTCTTCCCTTGATATGATAATAGACTTTGAACATAGATTATCCTTTTAAACATTGAC  
AATGAATACCCTGATATGTGAGCATCAGGAATTGGGGTCATCGCATAACCATACATTGTATA  
AGGCAGATACATAAAAGATAGTACCATGGATTTTACCTCATCTATTTCTCTATTAAAGACAA  
AAAAGTTTGCTGTATTTTCATCTCTTTTATCAACTAGATCATTTATTTCAATTTTCACTGATTTT  
TTCTTTTAATAATTCTTTTTGATGTGTAACACTAAACCTTTTAAATGACCTATATCTGGTATCC  
ATATTCAAATAAGGAACTTGTTCAACTAAGCTTATTATTTCTTTTTTGGATATGCATAGGAAT  
CGGTAATTCCTGATTATGGTTTGAATTTTACACTATCAGACCTTGCAGATGCTGATCCATAC  
CCAGAATCAATGAACTTCACTAATTCTAATTCATCACCCACATTGCACAAAGATTAGGAGA  
AATTCCCATCATTCTTTTGTAAGTAGTGTCTACAATGACATCTTTGAAATAATGTTCTTTTAG  
CATACTGCATCTGCTGTTTGTGACTTGAGTTTGTGAAAGTTTGACTAATAAACCCATTTTTAA  
TCCAGATAATTGGACATGTTTAAATTATTTCAATTAATTTATTATCTGTCATTTTTTCCATTTTG  
AAAACCTGCACAAGAATCATCAGAATAAGTAGTGGCCAAATACCTAGAAAGTGCAAGTGAGC  
TTAACATGTCTTCTAGCATCAGTTGTGATTGTATTCCCCATATAGGACCAAACCAACCTTCAA  
TTGCACCTTTTTGACCTTTTGAATAATATATCATATCAGTGAAAGGTTTCATCATTGATGACAA  
ATATGTTAGAAAACAGATATACAATAGAGATCATATTATCATATTCTTCCATTCCCTCAGTAT  
AACCATACATGTTTGCTATCTCTTCTATTATAAATAATGTGTTTTCCGGCCTCTGTGATGTGTT  
ATGCCCAGAATAATCTAGAAACAACGAATAACAATTTTCATCAGATATCATAGTACTCATTT  
TATACATTATATCTCTTCTTTTCGTCTTCAGACATAGTCATCATTTGTCTGGTAATAATTTTCA  
TGCTCTTTTCACTCTTCCATCATTGATGATATCCACAGTTTGAGTCTAAAGCTTGCTATACC  
AAAGAATCGTGCAGCTGGTTTTAATTCCTTTTTCTTTTTTCAGCAAGTCTTACAATAAAGTACTT  
TCTCATCTTTTTTAACTCATCATCTTTTCTATCATACACTTTAACTACCCTTTCTTGATCATTGT  
AATATTCTTCTTTATTTACTTTTCAGCTCTCTTGAAAAGTCTCCATCAAAATCATTTTTTATATA

ATAAATTAACCTCTTTTATGGAATTGGTTTTTTCATCATAGTCATCTTTGGTACAGGCCTTGTC  
AATTATTCTGGACTCAAGATTCATTTTCGTCACCTTCTTCTAACATTTTTCCTAGTCTAACATCT  
TTGTAATTCACAGGTTTCAGAACTATCAAGTTATTATAAATTCCTCCAGCTGCCATTATTTGT  
AACTCTTGATCTAAGAATGAGTTTGAGTTCATGAGTAGTGGAACCTTCCATATTTTTTAATG  
TAATTACGAATTACATTCATTCTAAATAACCTCCTTAATTTTTCAATTTGGTGCAAATCTACA  
GGATGATCCCTGTTTGTCTTTGAGTGTATTTTGTTAAACCTTGATCTTTTGATACCTCAGCAT  
AAATAGTGGTTTTACCAATACAAGACATTTTGATACATGTCATTCCATCTGATTCATCACATA  
TTTTTATCAATTTTTCTGTGTATTCTGGTGATAATTCATATGAATCTAAGACATTATCAAGAA  
TTGGTAAAGCAGCTGCAGTTCCTTTGGTGTCGGCCATTAATAAGCAAGTTGACTCATATAAT  
CCAGCTAATCCACTTCTTATCTTTGTATCAACAATCTGTGTTATAGATAGGATGTAATCTATG  
AATGGTTTTTCTGTTGGTTCAGCCATTTCCCTTAATAAAAATTTAAGGTGAACTCATGATCAATC  
ATCGATACTACATACCTTATCATGGATCCATCTCCAATGTTGATTGTTCCATTCCCATATGAA  
AATGCAGAGAAAGTTGATGAAATGTACCAAGTTGTTACAATACCTTCTCCTTCAATTTCTAG  
ATCAATTATTGACTGACCAGTACTGTACACTTCAACTCTTACCCTCTTTCCTTCATTGTAGTAT  
AATTCATTTCCCTAGTTTGATTCTGCATCTTTACCGACATGTTTATTTTGATTTTCCTATTAA  
TATTTTCAATAATGTCTAGTAGCCATGCAGATTCATCACTTCTTCTGAGAACTCAGTCTTCA  
TGCAACAATTCTTTTTATTGAGTAATGAATTACTTAGCTGATTTAATTCATGATCATAGAGAT  
CAGCAGAGAATGAGAGAAGTTTTCCAGCAGTAAGAGAAGATCTACTAAGAGATCTCAGCTT  
ATTCATCAGTTTATACACATGTACTGTGATGAATTACAATTTAATTCTCCATGTCTTTCTTTC  
ATTTCTGCTAAATAACAATTCCTAAGGACCCACAAATCCTCTTTTCATTTTCAATCCCCATTTT  
TCAGGATATAGATGGGTTGATGTAAACATCTCAATATTACTTTTCAGAAAATGATTTAAAAGG  
AGAATTGATTTTTTCCAATAAAATTGGCTTTGTTTTAATATTCTTTTCAATCCATCGAAATCC  
GACAGTGTGATTAAATTTTCATCTCAATTTTAACTTCTTCTGATTTTCGGTTCATGTCAGCTTCT  
TGTTTTCTCAAAGATGTAAAGTCATTATAGAATTTTCCATACTTATTTAAGATATTTCTTGTGT  
GAACATGGGAATCATGAATAGGGTTAAATAGGGCGCTCATGATTAAAATTATTAGCAATGA  
TAATAACTTAATAGCCAGTTTGTTAATATAAACTTATGGTTTAATAAACCAAATGATTTTTAT  
TAAACGATGAGATTTAGTTACTAGAACTTGAAGAAGTCTTTCCTTTATTTTTCTTTTTATCTT  
TTTTACATAATCTGCAAATTTTCTTTTTGATTGGGCTTCTTATTACTGTTCTTTTCTTAACTCCA  
AACATTTTCATGATGGTTTTTAATTCATGGTCTATCCTTCTACAGGTAAATTCACGTATTGG  
AGTTCAGGATTCTCTTCGTCAGTATAATCAGATGTGATTAATTCCACTTTTCCTGAATGGTAT  
AGAATGAATTGATTCTCCATACCCATAAGACGAGGTATCTTATTAAATCATCGACTGATCT  
AGCATAGACTAGCCTGAGTTCTTCAGAATCATCGGAACACGGAATTATTGTTTCATCACAAA  
TAACTAGTGCAATTTTACTCAATAGATCATTTGTTTTGAAAATCCACAATCCGAATAAAAGA  
ATCATTTTTGTGTTTTCTTTTAGAACATTTCTTTCTTTAGCTATTTCTAACAAGTTGTTAAGTT  
CATTTGTTTTTTCCTCACAAAGAGTTATTTCAATCTCCTTTGTCCATTTCAGGGAATATATGGG  
GATCAATATAGGACTTTTCAACTTTCTCTAGACATTCAATCGACATATTTTAATTAATAAATTGA  
GGAAAAGTTTTTACTTTTTAAAGTAAACCCACAGAGTTATCTCAATTTCTTTTGTCCATTCTG  
GGAATATATGAG

>Seq102 [organism=Xerochrysum ophiovirus\_visco] RNA2 genomic sequence

CTTGTTTCCCTTTTCGGAGGAGGACGTGGCCGACTAGGAGGTAGTACCAAGATCGCAATGATC  
AGCAACATTGCTCTATAGATTTACATGGTGAGATGGTCGCATTGACTTGTATCCACTCTTATA  
AATCTAAGAGACAACGGGAATCTCCCTATTCCGAATATCCTAGTTTTTATTAAAACGAATA  
CGATGTGAAAATTATCCAATCATCCTCTTTGAAGCTCACCAGAGGCACCTTGTTCATGAAC  
CACATCCTACCATCGGACGTGTTATCAACAACAAATTTGATCAAGTCTCCTTTCATCAAATG  
AATTGTATCACCTTCATCCATCATCCTATCAATTATTCCTTGTTTTTTTAATTGACTATAAGAA  
ATGAGATTTGGATTGATATTGTTTCCTACAAACACATTGTTGAGCTCAATTATTTCCCCACAC  
AAATCTAATACTAGTGAATTTATTTGAGTAACCCATAATTCACCCATTTTTGTTTTTCCTGAA  
TGCCCTTTTAAATGAATGAAATGAAATGGAGCACCTGTATCCAAGATATAACCTATGTCGCT  
TGAATATGGTTTTCTAGACCACTCTTCAAGATTAATTACACAATGTGGAATTAATCCTTCTAC  
AGATTCTTCATCAATTATAGAAGTAGAATTTCTTCTAGGAATATTGGAATTTCTTTCAGCAAC  
ATTTTCTAACAACCGTCTACAAATGTTTCCTCAGCTCTTTCTAATTTATCCAATTTCTTTTCT  
GTTAATAAAGAAGCTCTTTCAAGTTTTTTTCCAATGTTTCCTAAGCACAGACCCGGATTTAATT  
GTTTTCGGGTGACTTGTTGGATCAATGTAAAACACTTTTCGATCTTTCTACTTCATATGTGCCA  
GGAAAATAGGATGAATGAACATAAAATCCTATCATCATGGATGCAAATGAACCAATCTTTGT  
TGGTTCGTTATCAACTGTTGTTATTAAGTATTCTTTAATATCATTTTTTTGGGACAAAAAA  
AGACATGTTTCATCTCAGACATTGACATCTCATTATTGCAGCAGTGATACTAGCAATTACTCT  
ATTTTCTTTACTTCCTTTCATCCTTTCATCAATTAGAGAGAATGTAATCATTCTCCCTTATTT  
TTGCGTTGATCAAACAATGGACAATAAAGAATTTGCACTTTACTCAATCTCATATATGGCTT  
GTCAGAAACATTTACCATCTTCTTCAGTCCAGACCAAACCTGTGCTAGTGAAGTACAGTGA  
AAGATGCTTCACCAACCTTTCTCTCAAATTCAACTCTACTGGTGAAAAAGCTGAATTTATTT  
TACCTCTAGTCATTTTGCTAAATTCAGCAGCCATGCATTGCACTTCAGGACTTAATGGTTCAT  
CTCCTGAAAGGCTGATTATTGTTCTTCTCCAGCTGGGAATGTTTCACTTATAGCCCTTTCAA  
TTGATATTTCGTGTTTCCGATCGTTGTAATTCGGTTGGAAGTGTTGTTGATCTCCTGAGCAATC  
GTAATCCAGAGTTGACAGATTCCATCGAATTGTTTTCTGTTTAACAGCAAGAACGTTTTTCCT  
TTCTAAA

>Seq103 [organism=Xerochrysum ophiovirus\_visco] RNA3 genomic sequence

TGTAGCCATAGTTCCCTATTGACCTAGGAGTTTTATTTAAAACGAAATGCAGTAGTATTGAAA  
TACTGCAAAGAACTTACTTTGCATTTCCAGCAACAACAACAAATTCCTTCCCATACATATTC  
TTCAAGGTGTCAACTGTGATTGATGAAAAGTCACATGATGAATCGGTCAAGTTTTTGTGAAT  
TCTCGTACCAGAGGGCCCAGTCATTCCAATCAAATAAGTGTCTTCAGAAAAGCTTTGTTGT  
CTTCAAGGATTAAATTGTCAACAAGATCAATTCTCCCTTCATAGACAATGAAAATACAATT  
GCAGTGGTTATTTTCTTGTCAAGTTTGTCACTGATGGTTTGAATCCATTTAGTGGATGCATT  
CGGAGCATTGCTTCAAAGTCGGTTTGAACAGAAAGGAGATAGTCAACAATATTGTAGGCTTT  
TTGCAGCTTTAGCCTTTCATTGTTCACTTTTTCAAGTTCTTCCATGTTTTTTGGAAGAGCTGGC  
ATTGGGGCTCTCTCAAACCTTTGAAGCAAGAACGGCATATTTTACTATCTTGTTTCCAGCAACA  
GATAGTTTGCATCTAGCACAATCAGCATCAGGTAGAGTAGCTGTGTCAACTTTCAAAAAGAT  
TTTTTGAGGGAACTTTTTTGTTGAAGTGCTTGACAAAAGTTGAGGAATTTCAATTCATCATTTT  
GTGTTTTCCATCCAAAAGATGTTTTGATATGTAACTCGGTATTGGTCTCATATCTTTTTCATCT  
ATTATTGGTAAACCACCTTGAACATAAACCATGACAGTACAAGCTCTCAACAACCCCTTTC

CTTCTTAATGTTTCCTGGCCATAGCACTTTCCTTCATTTTCTCAACAACAAAAACATTGAACAT  
TCCACTTGATTTTTTCATTCTTACCCAAAGCGCTGTAAAGAATAGCATCAAGAGGGAGAGTAC  
CAGCTCCGAGATATTCAAACAAACTCCCTTCCTCATCAGTGTGAGCAAATTTGAAAACTTTA  
ACTTCCATTGGCCCATAACCTTCTCCATCAGCAGGTAGTTCTTTGTAAAACCTTGTCAGTTCT  
GCTTGAAGTGCCTCAATATTTACTTCAAAAGAACGAGCAGCTAGTTTTGCTCTTAATTCTTCA  
CCTTTTATTTCTTCATCATTTTCTTCTAATTCAGGGATCCTCTCCTCTTCTTCATCTTTTTTTGT  
GTTAGAAACATTCCCTTCGTCTTCTTCATCTATGTCCTTGACATGAGTTTTCCCGTTTCTTCA  
TCTACAAACATAAGATGATCCTTGCTGGGAGTGAGAGCAAGTTCATCAAGAGTCCTGACATT  
GATTTTAATTTTCATCTCTGTCTTTGTCAATAACTTTGAATTGCTCAAGAGTTTTCCACTCTTCT  
TTGCTCACTGTTTTTTGGTTTTTCTTGAACCTTGTTAAGAATTTTGTTGAGGTGAGAAGCTTTGA  
TGGTCGACATTCTGCAGCAAAATGGAATTCTATGAAAAAGTATATAATTGAAAAATTAAACC  
TGGTTTTTCTTGAA

>Seq104 [organism=Zostera ophiovirus] RNA1 genomic sequence

CCAAAGCTATGAAGATTAAGCTTAATACAGCAAAGGGAGATTTTAATCAAATTTTTTCCCTT  
TTCAGAGTCTCAATGACTGCTTTGACAAAAACAATGGCTATCACTCCTCATCTTCATAATCGT  
CATCTTCTTCCCAACCGATTCCCTCCTTCTTCCAGTAATGCTTTACAATCATCTATTGTCATATT  
CTTATTTCTCTCTATTTCCTCATCTGTAACTTAAACATACCAAATACGGAATCCCCCTCTACT  
TCTTTAAACAATTTCTCTTTTTTCGATTTCTTTTGAATGAATATCTAGTGCTTTAAACTTTACGT  
TCATAATGTCAGATTGTCTCATACAATTAAACATTGTATCTTCTTCTTTATCATTTAGGAAGT  
TAAGTATACCAGTTGACTCTATATCCGTTAATAATTTTGCTTCATGTTTCATCTATTATATGCTT  
TACTTTATCTCCTGTGTAGTAACTTATGTGATCTTCTATGTTATAATCTTTTGCTATTAACCTT  
AGATCATATTTTTTCATTTATCTTTAATAATCTATTGTAAATTAATTTATAATTAACATTAAT  
TTTTTGTTGCTTTGAATTTATTTTTCAACAAAACATCTTTACTCAACATAGACAACCTTTGTGAT  
CTCCTTTAGTCCACGTGTTTGTATGCCATTCCCTATAACATGTCACAGCATACCTTGCAGCTCT  
TGATACTTCATTTATAGCTTTACCTCTTTGATCCTTAAATTTCTGTTGTCTAATTCTAGCTTTT  
AATAGAGAAGTGGACACTTTTTTCATCATTTTTTAATGTTGTGGAAGTATGCTAACCAAAGACT  
TCTAGTATTTAAAGAATTTTAGTATTATTAATGACATTTAATGATAGATCTAAAAATTCATC  
TGCGGAAATATCTTTACATCCATCTATTATATTTTTCCCTGTTAACAACAACCTTTTGCTCACC  
TTTATTTTCAGGAGTTAAGTCTGACCCTACATTTGATTTTAATGCTCTTGACTCTTCATAATATA  
AATCATATAAATTATCTATCTTGTGAGTGGTATCACTAGTATCTAAAACATAATTATCTATAG  
ACGGAATTATCAATTTATTCCTATACTTTCAAATAAATTATTATCAATAAATGCTCTCTGCA  
TTGCATTACATTGTGTTTCATCAAGTAACTTGGCTATTATATTCTCATTTATTTTGTATTCTTC  
ATCTTTGTCTACTAGTAACATTTCAATCAGTTTTTTCGTCAGATATGTGTTCTTCTGTATGGTCT  
ATAACATTTTCATATTTTCTATTCAAAATATCATAATCTGTAATATTGTTTAAATCATTTGTTA  
ACATTTCACTTAATAAGCTCCTGTGATAACCTTTTACACTACTTTCAAATTTCTGTGTTCTCTT  
ATTAAAGTCTATCGTCAAATAAATTATACCAGGAGAATACTGATATGGAACATAGCAATTCA  
TTTCTACATCCTTGATTTGATCATAAAACAATTTATCAAAGTATTTTATCATTGTATTTAATCT  
TATGATAACTTTTTTCTTGAAAAACTTCATATCATCAATTATGTCTTCAAACAATCTTTGGT  
ATTAGTTACATGAGATGCATCTATTAAGAATATAGATGATCCTATATAATTCATATAATTATT  
TCTATCAAATGAATTAATAATTTGATTTTTCTTCTCTCATACCTATGATCCTGTTTATAATGTTA

TACCCATCATTTCTTGATATCGAGATATGATCAACTTTTTCTTCAATCATTGCAAGATGAAAA  
TCACCTCTGCCTCCAAATAAATCAATGATTTGGTCTTCACTTCTTATAAATCTATTATTTTTCA  
ATGTTTGTATTAATGATATTGCAGTAGGATATATATCAGACATAGTTGGAGATGACAAATGT  
TTAGGTCTCAAACCTTAATGCACAAATCATCTCATAAGCTCTAACTGCAGAAGATAATCCCTT  
TTTATCTACTAAATCTTTACTTGTACACTTATTTCTCTAAACATTATATTTCCAAAAACATTG  
TTATCATTCTTTTCAATGTAGTGATGGAACCTCAGTAGAGAAGTATTCGTTGATCTTGTTTTGA  
TGAATATTCATTTTATTTAACATTTTCATATACAATGTGTACTTGTTTCAGTGATTTTCATATGGTT  
CGTATGATAATATGGGCATCACATCAACAATTGCTCTAAATATCTTTTGATCTCTAGTATAAA  
TTTGTAGCTTTCCAGATTTGAGACCTCGAATATTTTTCCTTGATTTTTCCAGTGTTCTTTTCTC  
CATTATATGAAGTTTATAATTTCCATTATTAAGTGTATCAAGCTTATATATCATACTAGTTGC  
CATAATGAATAAACGTAATACAATAAATCTCATATCATTACTATATCCTTTATCCATCAATTC  
ATCAAACCATTTGGGTTGTAATGGATTTAAATACATGTGATCGTAAAGAATGGATCTGATAA  
TACATTTTGAAGGAGTGTCACTTTCAATTATGTTCAATCCTGCATAGAACTTGTAATAAAT  
GATACAAATTTTCCTTTGATCCGAATGTATCCTCTAAATTTGGTACTAACTTCCTAAGTGTCT  
TTTCAGGTATTAAGCATACAGAGGATTCAAATGAGTTATCCATGTAACGTTTATATTTATAT  
ATGCTGTTTGTATTGTCATTTTCAGTCTCACTACTACTTATCAGCTGGTTTATGAATGACTTTTC  
TAAATCTTCATCTACTGCTATAAAATTGGAAAAAGTGAGATACAGTGGTCCCCTTTCTATCA  
ATTCATTAACCTTTGATTATGTTTCGATTCTTTCAACTTCCGTAAACACTTGGATAACCTATAT  
TGAATAAATTGAAAGTAACATCTTTTGATATCTCATAACATCTTCAGTTAGAGTAAGTCTTA  
ATGCTTTATCTTTTCTTGTTGAGTTATAGATAAACTAACTCTTAGATATGTCATCACATACT  
GTAGATTTACATTATGATCTTTTCCTCCAGATTTTCATTATAAAGTCTCTTATCCTACTCAAATC  
CCATTTAGTAGTTTCCTTATTAGATGATAAGTCTCCAGTTTTAGGATTGAAATTTGCAGTTAA  
TGCCCTATGAAAAACCTTCCACCTTTTGGAGATGTCACATATTTTTCAAGATTGTAATAATT  
TCCATGACTAAATGTTGACAAGGATCTATTACACACTTCTATTAAACACAATTTTTCATCATC  
ACTATTTTTGAATATTTCTTCAGTTCCATCAGTATCCATTTTGTATATCTAACTAAATCAAAT  
GCCATAAATATTAACCTGTTTTTGAAGAAACCCTCAATTCCAATTTCTCTTTCAAATTTTGCC  
AGATTTGTATGAGATTTTACAGGAGGTCTTGACATATTTTATTATTGATTTTTTGAGTATTT  
GGCACATTGATAGGTTGTATAATAGTATCGTGAGAAAATGAGACAAGCTTTCCCATAAACCGG  
TAATTCCTTCTATGCCAATAAATTTCAATTGTATTATTTTCATCATTCTTCATGTACTTCAGACAA  
TGTTCTCTCGCTAGAAACAAATGATCATAATCTAGTATAGGATATTTGTTCAATTTCACCTTT  
CTATTGTAATTAATAGACCAAGCTTTGTTCTTAATTTTATTTAGAATCTTACCTCCAAGCATC  
ATTTTCATAGTACCAGAAGAATCTATCTTGTTCAATATTTCACTTATATAATTGAAAATTGTA  
CATTCCTTGATTTTCTCTGTTATCCTGCAAGAAAAGCAATCCTTAAAAGTTCTCAACAACATC  
ATATCAAACCTCTTCTGATTTCATCATTATCAATGCTCATATATTTTAACAAATCTGGGTTTC  
TTGTATATTCTTTTAACTTCAATTTTAATATATCATTTAATAATGTTTTAGTATCAACAAACCC  
ACCTGACAAAGGGAAAGGTGTAGTCAAATATTGCCTGGCATTGTTGATGGATTAATCAATT  
TTCCAAACAGTTTTGAATTATCTCTCTTAAGGAATCCTTGTATATATGATATTCTCTTAACATT  
AGATAATGAATATCCAGATATCAATGTGTCAGGCATAGGTGTTAGAGAATAACCGTAACAA  
CTTGTTGGTGCATACATTAACATTAATAACAATTCTAAAATTCTAATATTCTTTCTATGAAAG  
TGTATGAAGTTAACAGTATCATGTCTACTAGTTGGCAAAGACTTCATATCAAATCAGTTGT

TAAATCTTTCGTTTGTGCCTTCAACAATAACATTTCTCTAACATAATTTTTGTTTGACACTAA  
GAATCTATGATCTAATTCAACTTCTTCAGGAATTTTCAGTAAAAACCTTTTAAAGCTACTAGC  
CAATAACTTTAGAACACGATAATTCCGTAATATTGTCTGAATATGGATTTTCAGTGGACCGGA  
AACAAAGCAGAATTGTACCCTGAGTCTATCAATCCTGACATCTCTTGATCATCATATAATAAC  
CCTGAACCATTGGGAGATATTGACATAAAATTTCTTATAATTCGTTTCTATATATTCTTCATAT  
GTATAATGCTCTTTCAACATGCTACATCTTCCATTGGTAACTTGAGTTTGTGACAACTTTACT  
AGTAATCCCATATCTGAACCAAACCTTTGAATATTTTGAATTATATTATTCAACTTGTTTCTG  
TCCATATTCTTCTGTACAAAAACACCACATGAATCATCAGAATAAGTTGTTGCTATATACTGT  
TTCATCCCCATGTTTGAGAACATATCTTCAAGCATTAACTGTGATTGTATTCCCCATAATGAT  
CCAAACCAGCCCTCAATAGCACCTTTTGACCCTTTGAATAGTATACACTATCTCTCCATTTA  
TCTTCAGAAATGACTGTAATATTAGAAAATAGATATGCTAATGATGTAAATTTTTTCATAGAA  
AGGTTCTCCAGAATAACTTCCATACATGTTTGCTATTTCTTCAAGTAAGAACAATGTATTCTC  
AGGTCTCTGTGAAGTGTGTGACCCGAATAATCTAGAAACAATGAATAAGAATCATCTTCAG  
CTAATATCATTGACATCTTGTGCATTGTTTCTCTTCTTTTATCATCTGTCATAGTCATCATCTG  
TCCTGGTAACAGTTTCATTGCTCTCTTGACAACTCCATCATTGTACTAACCACAAATTTCAA  
ATTAAGATGCTATACCAAAGTATCTAGCTTTTTCTTTTAGTTCCTTTTCTTTTCACTAAGT  
CTTACCAGAAAATGCTTTCTATGATTGAATAATATTCGCTTTTCTATCAACTATCTTGATGT  
TTCTAGTCTCTTGATAATCTGAACTGAATATATACAATTCTTCTTCTCTAATTTTGCTTATATC  
ATTTCCATATGTAATAACTTATCTCTTTAACTGTATTATTATGTGAATTATAATTATCTGATGTG  
CAGGCTTTATCTATTATCCTTGTCTGTAAGTTGATTTCTTGACCTGGTTCTAAAAATTTTCTTA  
ATGTCAAATTGTTATATAATGTCAGATCAGATATGATTAAATTAGAATAGTCTGAAGATGAT  
GCCATCTTCTCCAGTTCATATGCAAGTGACTCAGGAACATCATATAATTTTGGAACTCC  
ATATTTTTTGATAAACTCTATTATAACTTTCTTTCTGAATAATGATCTCAATCTTTTAATTGTG  
TTCTCATTACAGGATTTTTTTTGCAATCCTCCCTCTGTGTCTGTTTCTGCCAATGACATCCTTA  
TACATTGAGACACTGAACTTTGAAGACACAAATTAACAAGCTTTTCAGTATAAAATGGACTG  
ACTTTTATAGATTCAATTAAATTATCCATTAAAGGCATAGAAGATGATTTCTTCTCTATAATCA  
GACATTAATAACAAGTTTGCTCATACAAACCTGCCAGTCTCTACTCTTTTGCTAGTTTCAGGA  
ATATCTAATAATGATTTTCATATATTCTAAAAAGCTCCTCTCGACATAACCTAGATTGATATCA  
TTCATCATATTTAATGTCATCATGTTATCAGTAATAAACATAGTGTAACCTTAACATTTCCAAT  
CTGCCCACATGTACTATATCTTCATCTGCAAAATTGTACGATGAGATAACATTTGATATAAA  
CATGTTCAAATTCATTTTCAGGATAATCTTTGAATTCTACAAGAACAAGACTGTTTCTGTGAAT  
ATGTGTTAATACATTTATTCTTTTACCTTCATAAAAGCTCACATTTCTTTTAATTTTCTTTTGA  
TTCTCCCTTGAGTACTGTTGATTTTATCATTTTATTGATTGTTTCAAATATATCTAGTACCC  
AATGGATTTTACATGATTCTTCTGACATCTCTATATTTTCACTAATATGATATTTGTCTTCCAT  
ATTCTTCTCAGTCAAATGTTGTGATAAGTTGTCTGCTTCCATTGAATATAACATCTTTGACAT  
TGTAATATATCAGCACATTCGACTGAAGGTGAGGCTATTTTCATTAATCTCTTATACAAATG  
GATAGCTGAATATTGATTATGATTATAATGATTTATAGGATGAAGTGATTTTCATATCAGAAA  
GATAAGCAGTTCTCCAATGATACAATGAAAATTGATCTTTCTTTGACCATTTTTTCAGGATACA  
GATTTCTAACATCATTTTCGATATTTTTCATCCGATAAAGATTTATAAGGACTATCAATTTTGT  
TAATCAAAGCAGGAGTACTCTCTTTAGTCAATATCCAATAATCAAAGTTCACATTTACCAGA

TGATTATGTTTTATGGGTATTTCAAATGATACTGGTTCAGATTCCATTTTCATCCTCATTTCTTA  
TAGAGCGATAAAGTTCAGAATAATGATCACTCATCTCTATCAGCAACTTGAACACGCAAGGA  
TGTTGAAGCTCATTAAATGTTATATCTTTCTAGCAAGTCACTTATGTTTCGAGAATGTTGGTCC  
ATTGTTTTCTATTCAAATTTTAGTTTATTTAAAACCATTCTCATTAATTAACATGATCAAATTA  
TCATTCAACAAACAGAAAATGATTTTCATGCAATTTCTTTAGAGTTGAATTTAACTTGTGCCT  
TCTAGATCTAACTTTTCTCTTTCTTTTCTTAGTGCATCTATTCATCATCATGCATTAAC  
TTCTCATATGGCAAATCAACAACTCCCCTAGTGTCTAAATAGATTGTAATTTACAAGATGCT  
TGAAGTATCATATCACAAATAAACATGATATCTTTATGCTCAATCATCATCTTTCTGACATCA  
TTTGTAATAAACACAGACATTTCTTCTATTTTCGATCACTTGTGTATTGTAAAACATGCTATCA  
ACCACTATCAAACCCATTGGATTCATAGGATAATCACGAATTTTATCATCTATTAACCATGAT  
CCAAACAAGCACCTTGTTAATACTTTATTTCGTGATAATCAGATTCTCTAAAAATTCCATATAC  
CTTCGATTTCTCAGCTTTAACTCTCATCAGCTTTCAAGTTACCCATGAACAGACCATCCAAA  
GTGAAGAAGCTTTATATTGCGACAATCATAACACAATTCTTCAGTATGGTCAATTGGGTCAAC  
AGATGAAATGTACATATCCGGAAGAGACATATGCACGAGAGGCCGATCAGCTAAATTGTTA  
TAAATGAGATCGAGAGAGTCCATGATTTAGAGTGATCTGTTGACAGCGTAAATTACGTTTAA  
GACCATCCAAAGTGAAGAAGCTTTATATTGCGACAATCATAACACAATT

>Seq105 [organism=Zostera ophiovirus] RNA3 genomic sequence

ATGTATCTTCTGACTGAAACACACAAAAAAGTTTGTTTAAAGCCCCATCAAAACGCAGCAC  
AAAATATCAGCAAAACAGACTAACAACTGTTTCATTGTTTACCCCAAACCCCTCTGATCGTT  
TCAATTGACAAGCCACTGAAGTCAGCAACGCTCTCATCGAATACAGGATAAGTCCTTATATT  
CGAATCAATGTCATTGCTGGTACTAATTCCCCAGAAATCGATGTCTTTCTTCCACGACAGAC  
GATTTTCAGAGACGACACGAGATGCCATCTGTCTCAGACCATCTATTGAAAGGCTATAGAGA  
ACAGCATGTGTCAATTTCTTCGTCAATCCAGGAAGAATGACTTTCGTTTCAGAGAAGGGATG  
ATTCATACATTGTGCTTCAAAATCACTTTCTAAGCTTGCCAGAAAAGTCCTTATCTCAATAGA  
AAATGCAATCTTTATATTGTCAGCCTCTAAATTCAGTCGATTGTGAGCAGGGGTAAACATAA  
ATCTGTTTTTCAAAACAATTCGCCATCGCAGCATACCGGATAACTCTATTACCAGCAACATTG  
AGACGACAGCGAGCAACACAAATTGAAGGAAGAAGATTTGATATATCAGGAAACAGAAAA  
GCACTACCAGGAAATTTCTTTAACTCGCAGAAGAAAGCAAATTGGCTAATTCACCTTGGTT  
CTTCAGCTCATTATGAAAAACAGTTTCACGGATAAACTTTGGTAACTGTTTTGTTTCATTGAG  
CTGAGGAAGATAACCTTGATTATAGACAAACACAAAAGCAGATGTCAGTGCTTTGTGTCCAA  
CAGAAATCTTGCGACAAATTTCAGCATCAGAAATGGTAAAAGTTCCATCAGGGTTCGGAGG  
AAGAGTGCTAATATCAAAAGCGTCAATATTGCTTTTCATGAAATGCTTGAACAGTATAGCAT  
CTATAACCCGAGTGCCAGCACCTATTAGAGACCCGAATGTGGATTTCAGAGTTCTCAAAGAA  
GACAATTTTCACCTCTTTCCGATCATATGTGTTATATTACCAGGTATCTCTCTAAGACATTC  
AATCAGAGAATCAGTGATATCATCTTTCCGAACTCCCAGGGCAACAGAGTTAAAGATCCTAT  
TCAATTCTGCTACACTGACATTACGTGTACCAGATGAACTGCCAGCACTGAAAACCTGATGAA  
GCAGGTCTAGGATTAATAGCTGGAGCAGGAACAATGACTTCATCTCGAACATAATCGACATT  
ACCATCTTTATCCCAAAGAACCAGTCTATTTCTCTCATTGACAGGAAGCAAGAAACTGACAG  
CCAAATCTAGTTTCCTAGTTCTGACATATTTCCCATGAGCATCAACATCAAAAAATCCTCTTC  
CCTTGAGAAGTCTCGACTTTGCTCATCTGTCAAGACTGAACGAGCGAGTGCTAAGAATTCA

TCAACGCTGAGACGTGAACTCTCATTCTTACAAATAAGTGACAATGGAAGAAGGCTGAA  
AACTACAAAAAGAGCAGGAGTGTGAAACGAGAAGATCGGGAAAGTCTGTGAGAAGGGATT  
TG TTCACAAGGTTGAACTGAGCATACGCGCAAAAAGATATCA
